# Supplementary material for: Identification of Novel Molecular Targets for Endometrial Cancer Using a Drill-Down LC-MS/MS Approach with iTRAQ
Source: PLoS One. 2011 Jan 31;6(1):e16352. doi: 10.1371/journal.pone.0016352 (PMC3031560; doi:10.1371/journal.pone.0016352)
Supplement: Table S1 — Protein average iTRAQ ratios and t-test results. (XLS) [file pone.0016352.s003.xls]

## Sheet: Table S1
Table S1: Protein average iTRAQ ratios and t-test results
			Normal proliferative samples		Endometrial carcinoma samples		Comparison by t-test
Protein Number	Accession Number	Protein Name	# occurences	Mean	# occurences	Mean	t-test value	Pvalue
1	trm|Q5HY55|Q5HY55_HUMAN spt|P21333|FLNA_HUMAN trm|Q5HY54|Q5HY54_HUMAN trm|Q5HY53|Q5HY53_HUMAN	Filamin A, alpha (Actin binding protein 280) Filamin-A (Alpha-filamin) (Filamin-1) (Endothelial actin-binding protein) (Actin-binding protein 280) (ABP-280) (Nonmuscle filamin) "Filamin A, alpha (Actin binding protein 280) " "Filamin A, alpha (Actin binding protein 280) "	10	0.9	10	0.672	-2.414	0.025
2	spt|Q9Y490|TLN1_HUMAN	Talin-1	10	0.998	10	0.917	-0.674	1
3	spt|P02768|ALBU_HUMAN	Serum albumin precursor	10	0.965	10	0.537	-3.88	0.001
4	spt|P18206|VINC_HUMAN	Vinculin (Metavinculin)	10	0.937	10	0.758	-1.981	0.05
5	trm|Q53G76|Q53G76_HUMAN trm|Q53GK6|Q53GK6_HUMAN trm|Q53G99|Q53G99_HUMAN spt|P60709|ACTB_HUMAN	Beta actin variant (Fragment) Beta actin variant (Fragment) Beta actin variant (Fragment) "Actin, cytoplasmic 1 (Beta-actin) "	10	0.983	10	0.996	0.109	1
6	trm|Q548L2|Q548L2_HUMAN trm|Q53HU8|Q53HU8_HUMAN spt|P08670|VIME_HUMAN	CTCL tumor antigen HD-CL-06 (Vimentin variant) Vimentin variant (Fragment) Vimentin	10	0.896	10	0.661	-1.615	0.1
7	trm|Q59EJ3|Q59EJ3_HUMAN trm|Q5SP17|Q5SP17_HUMAN spt|P08107|HSP71_HUMAN	Heat shock 70kDa protein 1A variant (Fragment) Heat shock 70kDa protein 1A Heat shock 70 kDa protein 1 (HSP70.1) (HSP70-1/HSP70-2)	10	1.047	10	1.087	0.385	1
8	trm|Q53H26|Q53H26_HUMAN spt|P02787|TRFE_HUMAN	Transferrin variant (Fragment) Serotransferrin precursor (Transferrin) (Siderophilin) (Beta-1-metal- binding globulin)	10	0.99	10	0.56	-4.25	0
9	spt|P01024|CO3_HUMAN	Complement C3 precursor [Contains: Complement C3 beta chain; Complement C3 alpha chain; C3a anaphylatoxin; Complement C3b alpha' chain; Complement C3c fragment; Complement C3dg fragment; Complement C3g fragment; Complement C3d fragment; Complement C3f fragment]	10	1.037	10	0.747	-4.155	0
10	trm|Q0V924|Q0V924_HUMAN trm|Q5VYM0|Q5VYM0_HUMAN spt|P55072|TERA_HUMAN	Valosin-containing protein Valosin-containing protein Transitional endoplasmic reticulum ATPase (TER ATPase) (15S Mg(2+)- ATPase p97 subunit) (Valosin-containing protein) (VCP)	10	1.017	10	1.125	1.829	0.05
11	trm|Q6P4C7|Q6P4C7_HUMAN spt|P05787|K2C8_HUMAN trm|Q0JUV7|Q0JUV7_HUMAN	KRT8 protein (Fragment) "Keratin, type II cytoskeletal 8 (Cytokeratin-8) (CK-8) (Keratin-8) (K8) " Hypothetical protein KRT8 (Fragment)	10	1.014	10	1.975	6.478	0
12	spt|P11021|GRP78_HUMAN	78 kDa glucose-regulated protein precursor (GRP 78) (Heat shock 70 kDa protein 5) (Immunoglobulin heavy chain-binding protein) (BiP) (Endoplasmic reticulum lumenal Ca(2+)-binding protein grp78)	10	1.063	10	0.94	-1.357	0.1
13	trm|Q58J86|Q58J86_HUMAN spt|P13639|EF2_HUMAN	Elongation factor 2 Elongation factor 2 (EF-2)	10	0.999	10	0.985	-0.185	1
14	spt|P08238|HS90B_HUMAN	Heat shock protein HSP 90-beta (HSP 84) (HSP 90)	9	0.981	8	1.112	1.415	0.1
15	trm|Q53X65|Q53X65_HUMAN spt|P04406|G3P_HUMAN trm|Q2TSD0|Q2TSD0_HUMAN	GAPD protein (Fragment) Glyceraldehyde-3-phosphate dehydrogenase (EC 1.2.1.12) (GAPDH) Aging-associated gene 9 protein	10	1.023	10	1.316	3.046	0.005
16	spt|P14618|KPYM_HUMAN trm|Q53GK4|Q53GK4_HUMAN	Pyruvate kinase isozymes M1/M2 (EC 2.7.1.40) (Pyruvate kinase muscle isozyme) (Pyruvate kinase 2/3) (Cytosolic thyroid hormone-binding protein) (CTHBP) (THBP1) Pyruvate kinase 3 isoform 1 variant (Fragment)	10	1	10	1.43	4.978	0
17	trm|Q53FT9|Q53FT9_HUMAN spt|P06733|ENOA_HUMAN	Enolase 1 variant (Fragment) Alpha-enolase (EC 4.2.1.11) (2-phospho-D-glycerate hydro-lyase) (Non- neural enolase) (NNE) (Enolase 1) (Phosphopyruvate hydratase) (C-myc promoter-binding protein) (MBP-1) (MPB-1) (Plasminogen-binding protein)	10	0.934	10	1.2	3.38	0.002
18	spt|P13667|PDIA4_HUMAN	Protein disulfide-isomerase A4 precursor (EC 5.3.4.1) (Protein ERp-72) (ERp72)	10	1.003	10	1.141	1.8	0.05
19	trm|Q8N6N5|Q8N6N5_HUMAN trm|Q8IZ29|Q8IZ29_HUMAN spt|P68371|TBB2C_HUMAN trm|Q8IWP6|Q8IWP6_HUMAN	Tubulin, beta 2C "Tubulin, beta 2C " Tubulin beta-2C chain (Tubulin beta-2 chain) Class IVb beta tubulin	10	1.095	10	1.046	-0.568	1
20	trm|Q5U0N8|Q5U0N8_HUMAN spt|P05783|K1C18_HUMAN trm|Q53G38|Q53G38_HUMAN	Keratin 18 (Cell proliferation-inducing protein 46) "Keratin, type I cytoskeletal 18 (Cytokeratin-18) (CK-18) (Keratin-18) (K18) " Keratin 18 variant (Fragment)	6	0.872	9	1.433	2.579	0.025
21	trm|Q5I6Y6|Q5I6Y6_HUMAN spt|P02545|LMNA_HUMAN	Lamin A/C transcript variant 1 Lamin-A/C (70 kDa lamin) (NY-REN-32 antigen)	6	0.969	6	0.803	-0.813	0.25
22	trm|Q5DSM0|Q5DSM0_HUMAN spt|P02788|TRFL_HUMAN	Growth-inhibiting protein 12 Lactotransferrin precursor (EC 3.4.21.-) (Lactoferrin) (Talalactoferrin alfa) [Contains: Kaliocin-1; Lactoferroxin A; Lactoferroxin B; Lactoferroxin C]	1	1.194	2	2.367
23	trm|Q6PJA4|Q6PJA4_HUMAN	IGHG1 protein	0		0
24	spt|Q01995|TAGL_HUMAN	Transgelin (Smooth muscle protein 22-alpha) (SM22-alpha) (WS3-10) (22 kDa actin-binding protein)	4	0.641	8	0.689	0.214	1
25	trm|Q8N473|Q8N473_HUMAN trm|O76045|O76045_HUMAN spt|P02452|CO1A1_HUMAN trm|Q59F64|Q59F64_HUMAN	Collagen, type I, alpha 1 Pro alpha 1(I) collagen Collagen alpha-1(I) chain precursor Collagen alpha 1 chain variant (Fragment)	8	0.994	10	0.523	-3.269	0.002
26	spt|P30101|PDIA3_HUMAN	Protein disulfide-isomerase A3 precursor (EC 5.3.4.1) (Disulfide isomerase ER-60) (ERp60) (58 kDa microsomal protein) (p58) (ERp57) (58 kDa glucose-regulated protein)	10	0.986	10	0.972	-0.175	1
27	trm|Q6FHZ0|Q6FHZ0_HUMAN spt|P40926|MDHM_HUMAN trm|Q75MT9|Q75MT9_HUMAN	MDH2 protein "Malate dehydrogenase, mitochondrial precursor (EC 1.1.1.37) " Hypothetical protein MDH2 (Fragment)	10	1.017	10	1.089	0.833	0.25
28	spt|P11142|HSP7C_HUMAN	Heat shock cognate 71 kDa protein (Heat shock 70 kDa protein 8)	10	1.003	10	1.128	1.681	0.1
29	spt|P06396|GELS_HUMAN	Gelsolin precursor (Actin-depolymerizing factor) (ADF) (Brevin) (AGEL)	10	0.997	10	0.946	-0.64	1
30	spt|P14625|ENPL_HUMAN	Endoplasmin precursor (Heat shock protein 90 kDa beta member 1) (94 kDa glucose-regulated protein) (GRP94) (gp96 homolog) (Tumor rejection antigen 1)	10	1.021	10	1.01	-0.202	1
31	trm|Q6NUR7|Q6NUR7_HUMAN trm|Q4VX75|Q4VX75_HUMAN	Villin 2 (Ezrin) Villin 2 (Ezrin)	8	1.077	7	1.466	2.12	0.05
32	spt|P68363|TBAK_HUMAN spt|Q71U36|TBA3_HUMAN	Tubulin alpha-ubiquitous chain (Alpha-tubulin ubiquitous) (Tubulin K- alpha-1) Tubulin alpha-3 chain (Alpha-tubulin 3) (Tubulin B-alpha-1)	10	0.972	10	1.163	1.7	0.1
33	spt|P22314|UBE1_HUMAN	Ubiquitin-activating enzyme E1 (A1S9 protein)	10	0.991	10	1.039	0.678	1
34	spt|Q9P2E9|RRBP1_HUMAN	Ribosome-binding protein 1 (Ribosome receptor protein) (180 kDa ribosome receptor homolog) (ES/130-related protein)	10	1.018	10	0.84	-1.869	0.05
35	trm|Q6FHP9|Q6FHP9_HUMAN trm|Q53HE2|Q53HE2_HUMAN spt|P60174|TPIS_HUMAN	Triosephosphate isomerase (EC 5.3.1.1) (TIM) (Triose-phosphate isomerase) (Fragment) Triosephosphate isomerase 1 variant (Fragment) Triosephosphate isomerase (EC 5.3.1.1) (TIM) (Triose-phosphate isomerase)	10	0.956	10	1.081	1.428	0.1
36	trm|Q5J7W1|Q5J7W1_HUMAN spt|P00558|PGK1_HUMAN	Phosphoglycerate kinase (EC 2.7.2.3) Phosphoglycerate kinase 1 (EC 2.7.2.3) (Primer recognition protein 2) (PRP 2)	10	0.989	10	1.35	3.089	0.005
37	spt|P63104|1433Z_HUMAN	14-3-3 protein zeta/delta (Protein kinase C inhibitor protein 1) (KCIP-1)	10	1.001	10	1.099	1.691	0.1
38	trm|Q8WUK1|Q8WUK1_HUMAN trm|Q96BB9|Q96BB9_HUMAN trm|Q6GMY2|Q6GMY2_HUMAN	IGHM protein IGHM protein IGHM protein	9	0.859	8	0.69	-1.414	0.1
39	spt|P22626|ROA2_HUMAN	Heterogeneous nuclear ribonucleoproteins A2/B1 (hnRNP A2 / hnRNP B1)	9	0.972	9	1.186	1.775	0.05
40	trm|Q6IBN1|Q6IBN1_HUMAN trm|Q5EC54|Q5EC54_HUMAN trm|Q59F98|Q59F98_HUMAN	HNRPK protein (Heterogeneous nuclear ribonucleoprotein K) Heterogeneous nuclear ribonucleoprotein K transcript variant Heterogeneous nuclear ribonucleoprotein K isoform a variant (Fragment)	10	1.014	10	1.153	2.659	0.01
41	trm|Q6FGI1|Q6FGI1_HUMAN spt|P37802|TAGL2_HUMAN	TAGLN2 protein (Transgelin 2) Transgelin-2 (SM22-alpha homolog)	10	0.985	10	1.127	1.828	0.05
42	trm|Q6FHB3|Q6FHB3_HUMAN spt|P08758|ANXA5_HUMAN	ANXA5 protein (Hypothetical protein ANXA5) (Fragment) Annexin A5 (Annexin V) (Lipocortin V) (Endonexin II) (Calphobindin I) (CBP-I) (Placental anticoagulant protein I) (PAP-I) (PP4) (Thromboplastin inhibitor) (Vascular anticoagulant-alpha) (VAC-alpha) (Anchorin CII)	10	0.997	10	0.778	-3.377	0.002
43	trm|Q8N1C8|Q8N1C8_HUMAN	Heat shock 70kD protein 9B (Mortalin-2) (Fragment)	10	1.091	10	1.215	1.377	0.1
44	spt|P06576|ATPB_HUMAN	ATP synthase subunit beta, mitochondrial precursor (EC 3.6.3.14)	10	0.967	10	0.841	-1.05	0.2
45	trm|Q6N090|Q6N090_HUMAN	Hypothetical protein DKFZp686G21220 (Fragment)	2	1.238	4	0.631
46	spt|Q96KP4|CNDP2_HUMAN	Cytosolic nonspecific dipeptidase (Glutamate carboxypeptidase-like protein 1) (CNDP dipeptidase 2)	10	1.016	10	1.304	1.908	0.05
47	spt|O43707|ACTN4_HUMAN	Alpha-actinin-4 (Non-muscle alpha-actinin 4) (F-actin cross-linking protein)	8	1.004	7	0.969	-0.425	1
48	trm|Q5TZY3|Q5TZY3_HUMAN	Glutathione S-transferase pi (GSTP1 protein)	10	0.991	10	1.29	2.855	0.01
49	spt|P07237|PDIA1_HUMAN	Protein disulfide-isomerase precursor (EC 5.3.4.1) (PDI) (Prolyl 4- hydroxylase subunit beta) (Cellular thyroid hormone-binding protein) (p55)	10	0.931	10	1.041	1.774	0.05
50	trm|Q38L19|Q38L19_HUMAN spt|P10809|CH60_HUMAN	Heat shock protein 60 "60 kDa heat shock protein, mitochondrial precursor (Hsp60) (60 kDa chaperonin) (CPN60) (Heat shock protein 60) (HSP-60) (Mitochondrial matrix protein P1) (P60 lymphocyte protein) (HuCHA60) "	10	1.022	10	1.198	2.121	0.025
51	spt|P08123|CO1A2_HUMAN trm|Q15177|Q15177_HUMAN trm|Q7Z5S6|Q7Z5S6_HUMAN	Collagen alpha-2(I) chain precursor Prepro-alpha2(I) collagen precursor "Collagen, type I, alpha 2 "	9	1.023	9	0.561	-3.36	0.002
52	trm|Q6ZN40|Q6ZN40_HUMAN	CDNA FLJ16459 fis, clone BRCAN2002473, moderately similar to Tropomyosin, fibroblast isoform 2	9	0.751	9	0.812	0.236	1
53	trm|Q5JNX2|Q5JNX2_HUMAN trm|Q6P4R1|Q6P4R1_HUMAN spt|P0C0L4|CO4A_HUMAN trm|Q4LE82|Q4LE82_HUMAN	Complement component 4A Complement component 4A (Rodgers blood group) Complement C4-A precursor (Acidic complement C4) [Contains: Complement C4 beta chain; Complement C4-A alpha chain; C4a anaphylatoxin; C4b-A; C4d-A; Complement C4 gamma chain] C4A variant protein (Fragment)	8	1.028	7	0.677	-6.179	0
54	spt|Q06830|PRDX1_HUMAN	Peroxiredoxin-1 (EC 1.11.1.15) (Thioredoxin peroxidase 2) (Thioredoxin-dependent peroxide reductase 2) (Proliferation-associated protein PAG) (Natural killer cell-enhancing factor A) (NKEF-A)	10	0.959	10	1.238	3.342	0.002
55	spt|P05164|PERM_HUMAN	Myeloperoxidase precursor (EC 1.11.1.7) (MPO) [Contains: 89 kDa myeloperoxidase; 84 kDa myeloperoxidase; Myeloperoxidase light chain; Myeloperoxidase heavy chain]	3	0.984	3	2.598	3.99	0.01
56	spt|P07339|CATD_HUMAN	Cathepsin D precursor (EC 3.4.23.5) [Contains: Cathepsin D light chain; Cathepsin D heavy chain]	9	0.961	9	1.222	2.463	0.025
57	trm|Q8TCD0|Q8TCD0_HUMAN	Hypothetical protein	2	1.957	2	0.4
58	trm|Q6IPN6|Q6IPN6_HUMAN trm|Q9NZS6|Q9NZS6_HUMAN trm|Q5VTE0|Q5VTE0_HUMAN trm|Q53HQ7|Q53HQ7_HUMAN trm|Q53HM9|Q53HM9_HUMAN trm|Q53HR5|Q53HR5_HUMAN trm|Q53GE9|Q53GE9_HUMAN trm|Q6IPT9|Q6IPT9_HUMAN spt|P68104|EF1A1_HUMAN	Eukaryotic translation elongation factor 1 alpha 1 Glucocorticoid receptor AF-1 specific elongation factor (Fragment) Eukaryotic translation elongation factor 1 alpha-like 3 Eukaryotic translation elongation factor 1 alpha 1 variant (Fragment) Eukaryotic translation elongation factor 1 alpha 1 variant (Fragment) Eukaryotic translation elongation factor 1 alpha 1 variant (Fragment) Eukaryotic tran…	10	0.98	10	1.013	0.26	1
59	trm|Q6S377|Q6S377_HUMAN	Plectin 10	1	1.104	2	1.081
60	trm|Q8NF12|Q8NF12_HUMAN spt|Q13938|CAYP1_HUMAN	FLJ00390 protein (Fragment) Calcyphosin (Calcyphosine)	10	0.953	10	1.596	4.112	0
61	trm|Q6ZSH5|Q6ZSH5_HUMAN spt|Q15084|PDIA6_HUMAN	CDNA FLJ45525 fis, clone BRTHA2026311, highly similar to Protein disulfide isomerase A6 (EC 5.3.4.1) Protein disulfide-isomerase A6 precursor (EC 5.3.4.1) (Protein disulfide isomerase P5) (Thioredoxin domain-containing protein 7)	10	1.006	9	0.921	-1.298	0.15
62	trm|Q5U077|Q5U077_HUMAN spt|P07195|LDHB_HUMAN	Lactate dehydrogenase B (Transformation-related protein 5) L-lactate dehydrogenase B chain (EC 1.1.1.27) (LDH-B) (LDH heart subunit) (LDH-H) (NY-REN-46 antigen)	10	0.982	10	1.065	1.262	0.15
63	spt|Q15365|PCBP1_HUMAN	Poly(rC)-binding protein 1 (Alpha-CP1) (hnRNP-E1) (Nucleic acid- binding protein SUB2.3)	7	1.028	10	1.126	0.643	1
64	trm|Q6FI10|Q6FI10_HUMAN spt|P04075|ALDOA_HUMAN	Fructose-bisphosphate aldolase Fructose-bisphosphate aldolase A (EC 4.1.2.13) (Muscle-type aldolase) (Lung cancer antigen NY-LU-1)	10	0.932	10	1.295	4.593	0
65	spt|P25705|ATPA_HUMAN	ATP synthase subunit alpha, mitochondrial precursor (EC 3.6.3.14)	10	1.019	10	1.028	0.106	1
66	trm|Q53HU0|Q53HU0_HUMAN spt|P50990|TCPQ_HUMAN trm|Q4VBP8|Q4VBP8_HUMAN trm|Q7Z759|Q7Z759_HUMAN	Chaperonin containing TCP1, subunit 8 (Theta) variant (Fragment) T-complex protein 1 subunit theta (TCP-1-theta) (CCT-theta) (NY-REN-15 antigen) "Chaperonin containing TCP1, subunit 8 (Theta) " CCT8 protein	9	1.046	9	1.074	0.305	1
67	spt|P11586|C1TC_HUMAN	C-1-tetrahydrofolate synthase, cytoplasmic (C1-THF synthase) [Includes: Methylenetetrahydrofolate dehydrogenase (EC 1.5.1.5); Methenyltetrahydrofolate cyclohydrolase (EC 3.5.4.9); Formyltetrahydrofolate synthetase (EC 6.3.4.3)]	7	1.159	5	0.968	-3.772	0.002
68	trm|Q5TCG3|Q5TCG3_HUMAN	OTTHUMP00000016816	2	0.854	4	1.023
69	spt|P07737|PROF1_HUMAN	Profilin-1 (Profilin I)	10	0.928	10	1.032	1.797	0.05
70	trm|Q53QP9|Q53QP9_HUMAN	Hypothetical protein CCT4 (Chaperonin containing TCP1, subunit 4) (Delta)	9	0.951	9	1.09	1.05	0.2
71	trm|Q6N0B3|Q6N0B3_HUMAN trm|Q567R4|Q567R4_HUMAN spt|P07355|ANXA2_HUMAN trm|Q8TBV2|Q8TBV2_HUMAN	Hypothetical protein DKFZp686P03159 ANXA2 protein (Annexin A2) Annexin A2 (Annexin II) (Lipocortin II) (Calpactin I heavy chain) (Chromobindin-8) (p36) (Protein I) (Placental anticoagulant protein IV) (PAP-IV) Annexin A2	10	0.933	10	0.976	0.265	1
72	spt|P26038|MOES_HUMAN	Moesin (Membrane-organizing extension spike protein)	10	0.963	10	0.981	0.334	1
73	spt|P04792|HSPB1_HUMAN	Heat-shock protein beta-1 (HspB1) (Heat shock 27 kDa protein) (HSP 27) (Stress-responsive protein 27) (SRP27) (Estrogen-regulated 24 kDa protein) (28 kDa heat shock protein)	10	0.958	10	0.681	-2.956	0.005
74	trm|Q53FI1|Q53FI1_HUMAN spt|P13796|PLSL_HUMAN trm|Q9NTI9|Q9NTI9_HUMAN	L-plastin variant (Fragment) Plastin-2 (L-plastin) (Lymphocyte cytosolic protein 1) (LCP-1) (LC64P) Lymphocyte cytosolic protein 1 (L-plastin)	9	0.983	9	1.275	2.499	0.025
75	trm|Q549N7|Q549N7_HUMAN trm|Q0JTD4|Q0JTD4_HUMAN spt|P68871|HBB_HUMAN	Mutant beta-globin Hypothetical protein HBB (Fragment) Hemoglobin subunit beta (Hemoglobin beta chain) (Beta-globin)	10	0.87	10	0.667	-1.162	0.15
76	spt|P19338|NUCL_HUMAN	Nucleolin (Protein C23)	5	0.849	7	1.423	4.895	0
77	trm|Q5U4P6|Q5U4P6_HUMAN	KHSRP protein	10	1	10	1.18	1.148	0.15
78	trm|Q53FP8|Q53FP8_HUMAN spt|P51911|CNN1_HUMAN	Calponin 1, basic, smooth muscle variant (Fragment) "Calponin-1 (Calponin H1, smooth muscle) (Basic calponin) "	9	0.679	9	0.525	-0.783	0.25
79	trm|Q53GL5|Q53GL5_HUMAN spt|P48735|IDHP_HUMAN	Isocitrate dehydrogenase 2 (NADP+), mitochondrial variant (Fragment) "Isocitrate dehydrogenase [NADP], mitochondrial precursor (EC 1.1.1.42) (Oxalosuccinate decarboxylase) (IDH) (NADP(+)-specific ICDH) (IDP) (ICD-M) "	9	1.033	8	1.258	2.103	0.05
80	trm|Q5EBM2|Q5EBM2_HUMAN	Hypothetical protein	8	1.121	7	0.671	-2.096	0.05
81	spt|P31948|STIP1_HUMAN	Stress-induced-phosphoprotein 1 (STI1) (Hsc70/Hsp90-organizing protein) (Hop) (Transformation-sensitive protein IEF SSP 3521) (NY- REN-11 antigen)	3	1.124	3	1.348	4.322	0.01
82	spt|P04083|ANXA1_HUMAN	Annexin A1 (Annexin I) (Lipocortin I) (Calpactin II) (Chromobindin-9) (p35) (Phospholipase A2 inhibitory protein)	10	1.074	10	1.492	2.077	0.05
83	trm|Q59FF0|Q59FF0_HUMAN spt|Q7KZF4|SND1_HUMAN	EBNA-2 co-activator variant (Fragment) Staphylococcal nuclease domain-containing protein 1 (p100 co- activator) (100 kDa coactivator) (EBNA2 coactivator p100)	6	1.03	6	1.155	0.802	0.25
84	spt|P06744|G6PI_HUMAN	Glucose-6-phosphate isomerase (EC 5.3.1.9) (GPI) (Phosphoglucose isomerase) (PGI) (Phosphohexose isomerase) (PHI) (Neuroleukin) (NLK) (Sperm antigen 36) (SA-36)	8	0.957	7	1.38	3.929	0.001
85	spt|Q15746|MYLK_HUMAN	Myosin light chain kinase, smooth muscle (EC 2.7.11.18) (MLCK) (Telokin) (Kinase-related protein) (KRP)	9	0.806	9	0.693	-0.646	1
86	spt|P40925|MDHC_HUMAN	Malate dehydrogenase, cytoplasmic (EC 1.1.1.37) (Cytosolic malate dehydrogenase)	10	0.924	10	1.178	2	0.05
87	spt|P30044|PRDX5_HUMAN	Peroxiredoxin-5, mitochondrial precursor (EC 1.11.1.15) (Prx-V) (Peroxisomal antioxidant enzyme) (PLP) (Thioredoxin reductase) (Thioredoxin peroxidase PMP20) (Antioxidant enzyme B166) (AOEB166) (TPx type VI) (Liver tissue 2D-page spot 71B) (Alu corepressor 1)	8	0.942	7	1.058	0.862	0.25
88	spt|P30086|PEBP1_HUMAN	Phosphatidylethanolamine-binding protein 1 (PEBP-1) (Prostatic-binding protein) (HCNPpp) (Neuropolypeptide h3) (Raf kinase inhibitor protein) (RKIP) [Contains: Hippocampal cholinergic neurostimulating peptide (HCNP)]	10	0.995	10	1.06	1.087	0.15
89	trm|Q53EM5|Q53EM5_HUMAN spt|P29401|TKT_HUMAN	Transketolase variant (Fragment) Transketolase (EC 2.2.1.1) (TK)	10	1.049	10	1.194	1.841	0.05
90	spt|P00738|HPT_HUMAN	Haptoglobin precursor [Contains: Haptoglobin alpha chain; Haptoglobin beta chain]	9	0.873	8	0.584	-2.281	0.025
91	trm|Q8WV32|Q8WV32_HUMAN spt|P37837|TALDO_HUMAN	TALDO1 protein (Fragment) Transaldolase (EC 2.2.1.2)	8	0.966	7	1.204	2.144	0.05
92	trm|Q6GMX4|Q6GMX4_HUMAN	IGLC1 protein	5	1.007	6	0.767	-1.642	0.1
93	spt|P46940|IQGA1_HUMAN	Ras GTPase-activating-like protein IQGAP1 (p195)	7	1.036	5	1.2	1.917	0.05
94	spt|P61981|1433G_HUMAN	14-3-3 protein gamma (Protein kinase C inhibitor protein 1) (KCIP-1)	10	0.978	10	0.982	0.037	1
95	spt|P31150|GDIA_HUMAN	Rab GDP dissociation inhibitor alpha (Rab GDI alpha) (Guanosine diphosphate dissociation inhibitor 1) (GDI-1) (XAP-4) (Oligophrenin- 2)	4	1.162	2	1.207
96	trm|Q53FB6|Q53FB6_HUMAN spt|P05091|ALDH2_HUMAN	Mitochondrial aldehyde dehydrogenase 2 variant (Fragment) "Aldehyde dehydrogenase, mitochondrial precursor (EC 1.2.1.3) (ALDH class 2) (ALDHI) (ALDH-E2) "	7	1.052	5	1.339	1.712	0.1
97	spt|Q86VP6|CAND1_HUMAN	Cullin-associated NEDD8-dissociated protein 1 (Cullin-associated and neddylation-dissociated protein 1) (p120 CAND1) (TBP-interacting protein TIP120A) (TBP-interacting protein of 120 kDa A)	3	1.166	6	1.141	-0.291	1
98	spt|P67936|TPM4_HUMAN	Tropomyosin alpha-4 chain (Tropomyosin-4) (TM30p1)	6	1.028	6	0.84	-1.952	0.05
99	trm|Q59GB4|Q59GB4_HUMAN spt|Q16555|DPYL2_HUMAN trm|Q53ET2|Q53ET2_HUMAN	Dihydropyrimidinase-like 2 variant (Fragment) Dihydropyrimidinase-related protein 2 (DRP-2) (Collapsin response mediator protein 2) (CRMP-2) (N2A3) Dihydropyrimidinase-like 2 variant (Fragment)	10	1.009	10	0.638	-3.943	0
100	spt|P02671|FIBA_HUMAN trm|Q4QQH7|Q4QQH7_HUMAN	Fibrinogen alpha chain precursor [Contains: Fibrinopeptide A] "Fibrinogen alpha chain (Fibrinogen, alpha chain, isoform alpha preproprotein) "	10	0.887	10	0.542	-3.182	0.005
101	trm|Q60FE7|Q60FE7_HUMAN spt|O75369|FLNB_HUMAN	Filamin B Filamin-B (FLN-B) (Beta-filamin) (Actin-binding-like protein) (Thyroid autoantigen) (Truncated actin-binding protein) (Truncated ABP) (ABP- 280 homolog) (ABP-278) (Filamin 3) (Filamin homolog 1) (Fh1)	3	1.256	6	1.159	-0.564	1
102	spt|P23526|SAHH_HUMAN	Adenosylhomocysteinase (EC 3.3.1.1) (S-adenosyl-L-homocysteine hydrolase) (AdoHcyase)	7	0.986	5	1.616	3.909	0.002
103	spt|Q9Y3Z3|SAMH1_HUMAN	SAM domain and HD domain-containing protein 1 (Dendritic cell-derived IFNG-induced protein) (DCIP) (Monocyte protein 5) (MOP-5)	3	1.291	3	1.178	-0.513	1
104	spt|P23528|COF1_HUMAN	Cofilin-1 (Cofilin, non-muscle isoform) (18 kDa phosphoprotein) (p18)	10	0.978	10	0.95	-0.199	1
105	spt|P32119|PRDX2_HUMAN	Peroxiredoxin-2 (EC 1.11.1.15) (Thioredoxin peroxidase 1) (Thioredoxin-dependent peroxide reductase 1) (Thiol-specific antioxidant protein) (TSA) (PRP) (Natural killer cell-enhancing factor B) (NKEF-B)	10	0.933	10	0.956	0.248	1
106	trm|Q3KQW3|Q3KQW3_HUMAN spt|P62937|PPIA_HUMAN	Peptidylprolyl isomerase A (Cyclophilin A) Peptidyl-prolyl cis-trans isomerase A (EC 5.2.1.8) (PPIase A) (Rotamase A) (Cyclophilin A) (Cyclosporin A-binding protein)	10	0.934	10	1.02	0.915	0.2
107	trm|Q0PVP5|Q0PVP5_HUMAN spt|P01009|A1AT_HUMAN	Alpha-1 antitrypsin variant Alpha-1-antitrypsin precursor (Alpha-1 protease inhibitor) (Alpha-1- antiproteinase)	10	0.993	10	0.557	-3.959	0
108	trm|Q53FV4|Q53FV4_HUMAN spt|P51884|LUM_HUMAN	Lumican variant (Fragment) Lumican precursor (Keratan sulfate proteoglycan lumican) (KSPG lumican)	8	0.918	7	0.83	-0.442	1
109	spt|Q00839|HNRPU_HUMAN	Heterogeneous nuclear ribonucleoprotein U (hnRNP U) (Scaffold attachment factor A) (SAF-A) (p120) (pp120)	10	0.925	10	1.297	3.96	0
110	spt|P55786|PSA_HUMAN	Puromycin-sensitive aminopeptidase (EC 3.4.11.-) (PSA)	3	1.335	6	1.044	-1.201	0.15
111	spt|P62258|1433E_HUMAN	14-3-3 protein epsilon (14-3-3E)	10	0.967	10	1.004	0.627	1
112	trm|Q53GL9|Q53GL9_HUMAN spt|Q13838|UAP56_HUMAN trm|Q0EFA1|Q0EFA1_HUMAN	HLA-B associated transcript 1 variant (Fragment) Spliceosome RNA helicase BAT1 (EC 3.6.1.-) (DEAD box protein UAP56) (56 kDa U2AF65-associated protein) (ATP-dependent RNA helicase p47) (HLA-B-associated transcript-1) BAT1 protein	8	0.946	7	1.17	1.439	0.1
113	trm|Q5CAQ7|Q5CAQ7_HUMAN trm|Q5CAQ6|Q5CAQ6_HUMAN spt|P07900|HS90A_HUMAN	Heat shock protein HSP 90-alpha 2 "Heat shock protein HSP 90-alpha 4 (Heat shock protein 90kDa alpha (Cytosolic), class A member 1) " Heat shock protein HSP 90-alpha (HSP 86) (NY-REN-38 antigen)	10	0.989	10	0.971	-0.178	1
114	spt|P09651|ROA1_HUMAN	Heterogeneous nuclear ribonucleoprotein A1 (Helix-destabilizing protein) (Single-strand RNA-binding protein) (hnRNP core protein A1)	9	0.854	8	1.417	2.903	0.01
115	spt|O43488|ARK72_HUMAN	Aflatoxin B1 aldehyde reductase member 2 (EC 1.-.-.-) (AFB1-AR 1) (Aldoketoreductase 7)	7	1.153	5	0.921	-2.905	0.01
116	spt|O00299|CLIC1_HUMAN	Chloride intracellular channel protein 1 (Nuclear chloride ion channel 27) (NCC27) (Chloride channel ABP) (Regulatory nuclear chloride ion channel protein) (hRNCC)	7	1.053	5	1.469	2.999	0.01
117	trm|Q6FHG6|Q6FHG6_HUMAN spt|P51888|PRELP_HUMAN	PRELP protein (Fragment) Prolargin precursor (Proline-arginine-rich end leucine-rich repeat protein)	4	0.751	2	1.697
118	spt|P00338|LDHA_HUMAN	L-lactate dehydrogenase A chain (EC 1.1.1.27) (LDH-A) (LDH muscle subunit) (LDH-M) (Proliferation-inducing gene 19 protein) (NY-REN-59 antigen)	10	1.014	10	1.453	3.013	0.005
119	spt|P52272|HNRPM_HUMAN	Heterogeneous nuclear ribonucleoprotein M (hnRNP M)	8	1.021	6	1.162	0.908	0.2
120	spt|Q96AE4|FUBP1_HUMAN	Far upstream element-binding protein 1 (FUSE-binding protein 1) (FBP) (DNA helicase V) (HDH V)	10	0.939	10	0.907	-0.479	1
121	trm|Q6FGL5|Q6FGL5_HUMAN spt|P80188|NGAL_HUMAN trm|Q5SYV9|Q5SYV9_HUMAN	LCN2 protein (Fragment) Neutrophil gelatinase-associated lipocalin precursor (NGAL) (p25) (25 kDa alpha-2-microglobulin-related subunit of MMP-9) (Lipocalin-2) (Oncogene 24p3) Lipocalin 2 (Oncogene 24p3)	0		2	4.216
122	trm|Q3LHW8|Q3LHW8_HUMAN spt|P16152|DHCA_HUMAN	Carbonyl reductase 1 Carbonyl reductase [NADPH] 1 (EC 1.1.1.184) (NADPH-dependent carbonyl reductase 1) (Prostaglandin-E(2) 9-reductase) (EC 1.1.1.189) (Prostaglandin 9-ketoreductase) (15-hydroxyprostaglandin dehydrogenase [NADP+]) (EC 1.1.1.197)	8	0.986	7	0.984	-0.019	1
123	trm|Q6IBM4|Q6IBM4_HUMAN spt|P31943|HNRH1_HUMAN	HNRPH1 protein Heterogeneous nuclear ribonucleoprotein H (hnRNP H)	8	0.904	7	0.958	0.277	1
124	trm|Q6IAZ4|Q6IAZ4_HUMAN spt|P14550|AK1A1_HUMAN	AKR1A1 protein (Aldo-keto reductase family 1, member A1) (Aldehyde reductase) Alcohol dehydrogenase [NADP+] (EC 1.1.1.2) (Aldehyde reductase) (Aldo- keto reductase family 1 member A1)	7	0.95	8	1.086	1.116	0.15
125	trm|Q6FIB9|Q6FIB9_HUMAN spt|Q9Y230|RUVB2_HUMAN	RUVBL2 protein (Hypothetical protein RUVBL2) RuvB-like 2 (EC 3.6.1.-) (48 kDa TATA box-binding protein-interacting protein) (48 kDa TBP-interacting protein) (TIP49b) (Repressing pontin 52) (Reptin 52) (51 kDa erythrocyte cytosolic protein) (ECP-51) (TIP60-associated protein 54-beta) (TAP54-beta)	5	1.145	7	1.266	0.666	1
126	spt|P01023|A2MG_HUMAN	Alpha-2-macroglobulin precursor (Alpha-2-M)	9	0.921	8	0.589	-3.312	0.002
127	trm|Q1KMD3|Q1KMD3_HUMAN	Scaffold attachment factor A2	6	1.005	3	1.08	0.818	0.25
128	trm|Q0JVC4|Q0JVC4_HUMAN spt|P09382|LEG1_HUMAN	Hypothetical protein LGALS1 (Fragment) Galectin-1 (Lectin galactoside-binding soluble 1) (Beta-galactoside- binding lectin L-14-I) (Lactose-binding lectin 1) (S-Lac lectin 1) (Galaptin) (14 kDa lectin) (HPL) (HBL) (Putative MAPK-activating protein MP12)	8	1.01	7	0.963	-0.302	1
129	spt|Q08211|DHX9_HUMAN	ATP-dependent RNA helicase A (EC 3.6.1.-) (Nuclear DNA helicase II) (NDH II) (DEAH box protein 9)	6	1.093	9	1.361	1.731	0.1
130	trm|Q59ER5|Q59ER5_HUMAN	WD repeat-containing protein 1 isoform 1 variant (Fragment)	9	1.082	9	0.916	-2.832	0.01
131	spt|P42167|LAP2B_HUMAN	Lamina-associated polypeptide 2, isoforms beta/gamma (Thymopoietin, isoforms beta/gamma) (TP beta/gamma) (Thymopoietin-related peptide isoforms beta/gamma) (TPRP isoforms beta/gamma) [Contains: Thymopoietin (TP) (Splenin); Thymopentin (TP5)]	1	1.153	2	1.066
132	spt|P00505|AATM_HUMAN trm|Q53FL3|Q53FL3_HUMAN	Aspartate aminotransferase, mitochondrial precursor (EC 2.6.1.1) (Transaminase A) (Glutamate oxaloacetate transaminase 2) Aspartate aminotransferase 2 variant (Fragment)	8	1.045	7	1.291	3.585	0.002
133	spt|O60701|UGDH_HUMAN	UDP-glucose 6-dehydrogenase (EC 1.1.1.22) (UDP-Glc dehydrogenase) (UDP-GlcDH) (UDPGDH)	9	0.9	9	1.106	1.648	0.1
134	spt|P30041|PRDX6_HUMAN	Peroxiredoxin-6 (EC 1.11.1.15) (Antioxidant protein 2) (1-Cys peroxiredoxin) (1-Cys PRX) (Acidic calcium-independent phospholipase A2) (EC 3.1.1.-) (aiPLA2) (Non-selenium glutathione peroxidase) (EC 1.11.1.7) (NSGPx) (24 kDa protein) (Liver 2D page spot 40) (Red blood cells page spot 12)	8	1.035	7	1.181	1.741	0.1
135	spt|Q93052|LPP_HUMAN	Lipoma-preferred partner (LIM domain-containing preferred translocation partner in lipoma)	7	0.854	8	0.831	-0.197	1
136	spt|P02647|APOA1_HUMAN	Apolipoprotein A-I precursor (Apo-AI) (ApoA-I) [Contains: Apolipoprotein A-I(1-242)]	8	0.991	6	0.665	-2.548	0.025
137	trm|Q59F66|Q59F66_HUMAN	DEAD box polypeptide 17 isoform p82 variant (Fragment)	4	1.005	5	1.182	0.895	0.25
138	spt|P06748|NPM_HUMAN	Nucleophosmin (NPM) (Nucleolar phosphoprotein B23) (Numatrin) (Nucleolar protein NO38)	9	1.014	8	1.286	2.377	0.025
139	spt|P40121|CAPG_HUMAN trm|Q53SA7|Q53SA7_HUMAN	Macrophage capping protein (Actin-regulatory protein CAP-G) Hypothetical protein CAPG	6	0.909	6	1.67	5.356	0
140	trm|Q68CK0|Q68CK0_HUMAN spt|P04217|A1BG_HUMAN	Alpha-1-B glycoprotein Alpha-1B-glycoprotein precursor (Alpha-1-B glycoprotein)	6	1.066	6	0.694	-2.786	0.01
141	trm|Q2M1U4|Q2M1U4_HUMAN spt|P04040|CATA_HUMAN	Catalase Catalase (EC 1.11.1.6)	4	0.98	5	1.086	0.632	1
142	spt|P02675|FIBB_HUMAN	Fibrinogen beta chain precursor [Contains: Fibrinopeptide B]	9	0.933	9	0.504	-3.11	0.005
143	trm|Q4LE64|Q4LE64_HUMAN spt|Q14980|NUMA1_HUMAN	NUMA1 variant protein (Fragment) Nuclear mitotic apparatus protein 1 (NuMA protein) (SP-H antigen)	2	0.663	5	0.819
144	trm|Q6IBH5|Q6IBH5_HUMAN spt|P23284|PPIB_HUMAN	Peptidyl-prolyl cis-trans isomerase (EC 5.2.1.8) Peptidyl-prolyl cis-trans isomerase B precursor (EC 5.2.1.8) (PPIase) (Rotamase) (Cyclophilin B) (S-cyclophilin) (SCYLP) (CYP-S1)	10	0.949	10	0.98	0.358	1
145	spt|P00450|CERU_HUMAN trm|Q1L857|Q1L857_HUMAN	Ceruloplasmin precursor (EC 1.16.3.1) (Ferroxidase) Ceruloplasmin (Fragment)	7	1.121	5	0.621	-3.806	0.002
146	spt|Q99497|PARK7_HUMAN	Protein DJ-1 (Oncogene DJ1)	10	0.935	10	0.925	-0.099	1
147	trm|Q2VIN3|Q2VIN3_HUMAN	RBM1 (Fragment)	1	0.769	2	1.063
148	trm|Q96GX7|Q96GX7_HUMAN	Selenium binding protein 1 (SELENBP1 protein)	9	0.96	9	1.141	1.234	0.15
149	trm|Q71RH4|Q71RH4_HUMAN	FP1047	10	0.955	10	1.057	1.179	0.15
150	trm|Q7LDY7|Q7LDY7_HUMAN spt|P36957|ODO2_HUMAN trm|Q6IBS5|Q6IBS5_HUMAN	Alpha-KG-E2 "Dihydrolipoyllysine-residue succinyltransferase component of 2- oxoglutarate dehydrogenase complex, mitochondrial precursor (EC 2.3.1.61) (Dihydrolipoamide succinyltransferase component of 2- oxoglutarate dehydrogenase complex) (E2) (E2K) " DLST protein	9	1.034	9	0.966	-0.598	1
151	trm|Q7L266|Q7L266_HUMAN	ASRGL1 protein (Fragment)	7	0.992	10	1.278	1.809	0.05
152	trm|Q6NXQ8|Q6NXQ8_HUMAN trm|Q6IPD2|Q6IPD2_HUMAN trm|Q6NSD1|Q6NSD1_HUMAN spt|P08865|RSSA_HUMAN	Ribosomal protein SA "Ribosomal protein SA (Laminin receptor 1) (Ribosomal protein SA, 67kDa) " Ribosomal protein SA 40S ribosomal protein SA (p40) (34/67 kDa laminin receptor) (Colon carcinoma laminin-binding protein) (NEM/1CHD4) (Multidrug resistance- associated protein MGr1-Ag)	10	0.861	10	1.042	1.687	0.1
153	spt|P49411|EFTU_HUMAN	Elongation factor Tu, mitochondrial precursor (EF-Tu) (P43)	8	1.042	7	1.085	0.379	1
154	trm|Q7Z3V0|Q7Z3V0_HUMAN trm|Q567U4|Q567U4_HUMAN trm|Q0QER2|Q0QER2_HUMAN spt|O75874|IDHC_HUMAN trm|Q0JVH0|Q0JVH0_HUMAN	Hypothetical protein DKFZp686M0959 (Hypothetical protein IDH1) "Isocitrate dehydrogenase 1 (NADP+), soluble " Isocitrate dehydrogenase 1 (Fragment) Isocitrate dehydrogenase [NADP] cytoplasmic (EC 1.1.1.42) (Cytosolic NADP-isocitrate dehydrogenase) (Oxalosuccinate decarboxylase) (IDH) (NADP(+)-specific ICDH) (IDP) Hypothetical protein IDH1 (Fragment)	10	1.006	10	1.244	1.493	0.1
155	trm|Q6IPF4|Q6IPF4_HUMAN trm|Q59HD4|Q59HD4_HUMAN spt|Q15366|PCBP2_HUMAN trm|Q68Y55|Q68Y55_HUMAN trm|Q32Q82|Q32Q82_HUMAN	Poly(RC) binding protein 2 Poly(RC)-binding protein 2 isoform b variant (Fragment) Poly(rC)-binding protein 2 (Alpha-CP2) (hnRNP-E2) Poly(RC) binding protein 2 PCBP2 protein	9	0.996	8	1.145	1.666	0.1
156	spt|P08727|K1C19_HUMAN	Keratin, type I cytoskeletal 19 (Cytokeratin-19) (CK-19) (Keratin-19) (K19)	9	1.115	8	1.241	0.623	1
157	spt|P40939|ECHA_HUMAN	Trifunctional enzyme subunit alpha, mitochondrial precursor (TP-alpha) (78 kDa gastrin-binding protein) [Includes: Long-chain enoyl-CoA hydratase (EC 4.2.1.17); Long chain 3-hydroxyacyl-CoA dehydrogenase (EC 1.1.1.211)]	4	1.066	5	1.3	1.291	0.15
158	trm|Q6FG40|Q6FG40_HUMAN spt|P12277|KCRB_HUMAN	CKB protein Creatine kinase B-type (EC 2.7.3.2) (Creatine kinase B chain) (B-CK)	10	1.002	10	0.693	-2.326	0.025
159	spt|Q14204|DYHC_HUMAN	Dynein heavy chain, cytosolic (DYHC) (Cytoplasmic dynein heavy chain 1) (DHC1) (Dynein heavy chain 1, cytoplasmic 1)	4	0.918	2	1.24
160	spt|P27797|CALR_HUMAN trm|Q53G71|Q53G71_HUMAN	Calreticulin precursor (CRP55) (Calregulin) (HACBP) (ERp60) (grp60) Calreticulin variant (Fragment)	8	0.9	7	0.952	0.697	0.25
161	trm|Q9BRB1|Q9BRB1_HUMAN spt|Q14240|IF4A2_HUMAN spt|P60842|IF4A1_HUMAN	Hypothetical protein (Fragment) Eukaryotic initiation factor 4A-II (EC 3.6.1.-) (ATP-dependent RNA helicase eIF4A-2) (eIF4A-II) (eIF-4A-II) Eukaryotic initiation factor 4A-I (EC 3.6.1.-) (ATP-dependent RNA helicase eIF4A-1) (eIF4A-I) (eIF-4A-I)	8	1.067	7	1.189	1.499	0.1
162	trm|Q6P0L6|Q6P0L6_HUMAN trm|Q6IAM6|Q6IAM6_HUMAN spt|P28838|AMPL_HUMAN	Leucine aminopeptidase 3 LAP3 protein Cytosol aminopeptidase (EC 3.4.11.1) (Leucine aminopeptidase) (LAP) (Leucyl aminopeptidase) (Proline aminopeptidase) (EC 3.4.11.5) (Prolyl aminopeptidase) (Peptidase S)	7	1.045	10	1.093	0.424	1
163	trm|Q96DH3|Q96DH3_HUMAN spt|P30153|2AAA_HUMAN trm|Q6ICQ3|Q6ICQ3_HUMAN	Protein phosphatase 2 (Formerly 2A), regulatory subunit A (PR 65), alpha isoform "Serine/threonine-protein phosphatase 2A 65 kDa regulatory subunit A alpha isoform (PP2A, subunit A, PR65-alpha isoform) (PP2A, subunit A, R1-alpha isoform) (Medium tumor antigen-associated 61 kDa protein) " PPP2R1A protein (Fragment)	6	0.812	4	1.574	1.667	0.1
164	spt|P12956|KU70_HUMAN trm|Q6FG89|Q6FG89_HUMAN	ATP-dependent DNA helicase 2 subunit 1 (EC 3.6.1.-) (ATP-dependent DNA helicase II 70 kDa subunit) (Lupus Ku autoantigen protein p70) (Ku70) (70 kDa subunit of Ku antigen) (Thyroid-lupus autoantigen) (TLAA) (CTC box-binding factor 75 kDa subunit) (CTCBF) (CTC75) (DNA-repair protein XRCC6) G22P1 protein	7	0.878	5	1.067	2.567	0.025
165	trm|Q6NXR8|Q6NXR8_HUMAN spt|P61247|RS3A_HUMAN	Ribosomal protein S3A 40S ribosomal protein S3a	4	0.894	5	1.569	1.691	0.1
166	spt|P04264|K2C1_HUMAN	Keratin, type II cytoskeletal 1 (Cytokeratin-1) (CK-1) (Keratin-1) (K1) (67 kDa cytokeratin) (Hair alpha protein)	8	1.254	6	0.891	-1.639	0.1
167	trm|Q4VXH6|Q4VXH6_HUMAN spt|P52209|6PGD_HUMAN	6-phosphogluconate dehydrogenase, decarboxylating "6-phosphogluconate dehydrogenase, decarboxylating (EC 1.1.1.44) "	7	0.961	7	1.058	0.692	1
168	spt|P07741|APT_HUMAN	Adenine phosphoribosyltransferase (EC 2.4.2.7) (APRT)	8	0.896	7	1.156	1.58	0.1
169	trm|Q0D2M2|Q0D2M2_HUMAN spt|P57053|H2BFS_HUMAN spt|Q5QNW6|H2B2F_HUMAN spt|Q16778|H2B2E_HUMAN spt|P23527|H2B1O_HUMAN spt|Q99877|H2B1N_HUMAN spt|Q99879|H2B1M_HUMAN spt|O60814|H2B1K_HUMAN spt|P06899|H2B1J_HUMAN spt|Q93079|H2B1H_HUMAN spt|P58876|H2B1D_HUMAN spt|P62807|H2B1C_HUMAN spt|P33778|H2B1B_HUMAN	HIST1H2BG protein Histone H2B type F-S (H2B.s) (H2B/s) Histone H2B type 2-F Histone H2B type 2-E (H2B.q) (H2B/q) (H2B-GL105) Histone H2B type 1-O (H2B.n) (H2B/n) (H2B.2) Histone H2B type 1-N (H2B.d) (H2B/d) Histone H2B type 1-M (H2B.e) (H2B/e) Histone H2B type 1-K (H2B K) (HIRA-interacting protein 1) Histone H2B type 1-J (H2B.r) (H2B/r) (H2B.1) Histone H2B type 1-H (H2B.j) (H2B/j) Histone H2B typ…	10	0.954	10	1.185	2.209	0.025
170	spt|O75368|SH3L1_HUMAN	SH3 domain-binding glutamic acid-rich-like protein	7	0.816	5	0.91	0.717	0.25
171	spt|P31939|PUR9_HUMAN	Bifunctional purine biosynthesis protein PURH [Includes: Phosphoribosylaminoimidazolecarboxamide formyltransferase (EC 2.1.2.3) (AICAR transformylase); IMP cyclohydrolase (EC 3.5.4.10) (Inosinicase) (IMP synthetase) (ATIC)]	6	1.171	7	1.197	0.146	1
172	trm|Q3B757|Q3B757_HUMAN	PSMC3 protein (Fragment)	4	0.905	5	0.987	0.502	1
173	spt|P50502|F10A1_HUMAN trm|Q0IJ56|Q0IJ56_HUMAN trm|Q1XBU6|Q1XBU6_HUMAN	Hsc70-interacting protein (Hip) (Suppression of tumorigenicity protein 13) (Putative tumor suppressor ST13) (Protein FAM10A1) (Progesterone receptor-associated p48 protein) (NY-REN-33 antigen) FAM10A4 protein (Fragment) Aging-associated protein 14b	8	0.982	7	0.765	-1.88	0.05
174	trm|Q59GF8|Q59GF8_HUMAN	Heat shock 70kDa protein 4 isoform a variant (Fragment)	3	1.179	2	1.082
175	trm|Q6IAT6|Q6IAT6_HUMAN spt|P09960|LKHA4_HUMAN	LTA4H protein Leukotriene A-4 hydrolase (EC 3.3.2.6) (LTA-4 hydrolase) (Leukotriene A(4) hydrolase)	3	1.011	3	1.237	1.247	0.15
176	trm|Q5SZU1|Q5SZU1_HUMAN spt|O43175|SERA_HUMAN	Phosphoglycerate dehydrogenase D-3-phosphoglycerate dehydrogenase (EC 1.1.1.95) (3-PGDH)	4	1.116	5	1.448	1.214	0.15
177	spt|P63000|RAC1_HUMAN	Ras-related C3 botulinum toxin substrate 1 precursor (p21-Rac1) (Ras- like protein TC25)	6	1.124	9	1.013	-0.846	0.25
178	spt|O95336|6PGL_HUMAN	6-phosphogluconolactonase (EC 3.1.1.31) (6PGL)	10	0.977	10	1.065	0.906	0.2
179	spt|Q13435|SF3B2_HUMAN trm|Q9BWD2|Q9BWD2_HUMAN trm|Q7Z627|Q7Z627_HUMAN trm|Q7Z3K9|Q7Z3K9_HUMAN	Splicing factor 3B subunit 2 (Spliceosome-associated protein 145) (SAP 145) (SF3b150) (Pre-mRNA-splicing factor SF3b 145 kDa subunit) SF3B2 protein (Fragment) SF3B2 protein (Fragment) Hypothetical protein DKFZp781L0540 (Fragment)	2	1.073	4	0.951
180	trm|Q53G83|Q53G83_HUMAN spt|P23396|RS3_HUMAN	Ribosomal protein S3 variant (Fragment) 40S ribosomal protein S3	3	1.123	3	1.356	0.787	0.25
181	trm|Q53HK5|Q53HK5_HUMAN trm|Q53HL7|Q53HL7_HUMAN spt|Q9Y265|RUVB1_HUMAN	TATA binding protein interacting protein 49 kDa variant (Fragment) TATA binding protein interacting protein 49 kDa variant (Fragment) RuvB-like 1 (EC 3.6.1.-) (49 kDa TATA box-binding protein-interacting protein) (49 kDa TBP-interacting protein) (TIP49a) (Pontin 52) (Nuclear matrix protein 238) (NMP 238) (54 kDa erythrocyte cytosolic protein) (ECP-54) (TIP60-associated protein 54-alpha) (TAP54-al…	8	1.226	7	1.239	0.076	1
182	trm|Q8TAQ6|Q8TAQ6_HUMAN spt|Q99798|ACON_HUMAN trm|Q6FHX0|Q6FHX0_HUMAN	Aconitase 2, mitochondrial "Aconitate hydratase, mitochondrial precursor (EC 4.2.1.3) (Citrate hydro-lyase) (Aconitase) " ACO2 protein	8	1.039	7	1.05	0.139	1
183	trm|Q53FG3|Q53FG3_HUMAN spt|Q12905|ILF2_HUMAN	Interleukin enhancer binding factor 2 variant (Fragment) Interleukin enhancer-binding factor 2 (Nuclear factor of activated T- cells 45 kDa)	6	0.976	3	1.586	3.023	0.01
184	trm|Q53FT8|Q53FT8_HUMAN spt|P20618|PSB1_HUMAN	Proteasome beta 1 subunit variant (Fragment) Proteasome subunit beta type 1 (EC 3.4.25.1) (Proteasome component C5) (Macropain subunit C5) (Multicatalytic endopeptidase complex subunit C5) (Proteasome gamma chain)	7	0.955	5	1.279	5.1	0
185	trm|Q561V9|Q561V9_HUMAN spt|P60660|MYL6_HUMAN	Myosin, light polypeptide 6, alkali, smooth muscle and non- muscle Myosin light polypeptide 6 (Smooth muscle and nonmuscle myosin light chain alkali 6) (Myosin light chain alkali 3) (Myosin light chain 3) (MLC-3) (LC17)	8	0.881	7	1.044	1.306	0.15
186	spt|O75643|U520_HUMAN	U5 small nuclear ribonucleoprotein 200 kDa helicase (EC 3.6.1.-) (U5 snRNP-specific 200 kDa protein) (U5-200KD) (Activating signal cointegrator 1 complex subunit 3-like 1) (BRR2 homolog)	0		2	1.221
187	spt|P12429|ANXA3_HUMAN	Annexin A3 (Annexin III) (Lipocortin III) (Placental anticoagulant protein III) (PAP-III) (35-alpha calcimedin) (Inositol 1,2-cyclic phosphate 2-phosphohydrolase)	6	1.052	6	0.897	-1.003	0.2
188	spt|P28070|PSB4_HUMAN	Proteasome subunit beta type 4 precursor (EC 3.4.25.1) (Proteasome beta chain) (Macropain beta chain) (Multicatalytic endopeptidase complex beta chain) (Proteasome chain 3) (HSN3) (HsBPROS26)	2	0.928	4	1.54
189	spt|P11940|PABP1_HUMAN	Polyadenylate-binding protein 1 (Poly(A)-binding protein 1) (PABP 1)	5	1.081	7	1.101	0.218	1
190	spt|P07585|PGS2_HUMAN	Decorin precursor (Bone proteoglycan II) (PG-S2) (PG40)	9	0.908	9	0.666	-1.718	0.1
191	trm|Q9NPK9|Q9NPK9_HUMAN spt|P22105|TENX_HUMAN trm|Q5SQD3|Q5SQD3_HUMAN trm|Q5JNX3|Q5JNX3_HUMAN trm|Q5ST74|Q5ST74_HUMAN	DJ34F7.1.1 (Tenascin XB (Isoform 1)) Tenascin-X precursor (TN-X) (Hexabrachion-like protein) Tenascin XB (OTTHUMP00000062664) Tenascin XB (Fragment) Tenascin XB	1	0.65	2	0.759
192	spt|P13804|ETFA_HUMAN	Electron transfer flavoprotein subunit alpha, mitochondrial precursor (Alpha-ETF)	6	0.87	4	2.24	2.678	0.025
193	trm|Q5JPB8|Q5JPB8_HUMAN spt|Q9NY33|DPP3_HUMAN	Hypothetical protein DKFZp686O1117 Dipeptidyl-peptidase 3 (EC 3.4.14.4) (Dipeptidyl-peptidase III) (DPP III) (Dipeptidyl aminopeptidase III) (Dipeptidyl arylamidase III)	3	0.975	6	1.3	2.311	0.05
194	spt|P49748|ACADV_HUMAN trm|Q53HR2|Q53HR2_HUMAN	Very-long-chain specific acyl-CoA dehydrogenase, mitochondrial precursor (EC 1.3.99.-) (VLCAD) "Acyl-Coenzyme A dehydrogenase, very long chain variant (Fragment) "	5	0.998	4	1.225	1.407	0.15
195	spt|P61088|UBE2N_HUMAN	Ubiquitin-conjugating enzyme E2 N (EC 6.3.2.19) (Ubiquitin-protein ligase N) (Ubiquitin carrier protein N) (Ubc13) (Bendless-like ubiquitin-conjugating enzyme)	9	0.948	9	1.004	0.804	0.25
196	spt|P42224|STAT1_HUMAN	Signal transducer and activator of transcription 1-alpha/beta (Transcription factor ISGF-3 components p91/p84)	1	0.992	2	0.979
197	trm|Q8TBK9|Q8TBK9_HUMAN trm|Q86YS2|Q86YS2_HUMAN spt|P06454|PTMA_HUMAN trm|Q15204|Q15204_HUMAN trm|Q15202|Q15202_HUMAN trm|Q53S24|Q53S24_HUMAN	Prothymosin, alpha (Gene sequence 28) Prothymosin alpha protein Prothymosin alpha [Contains: Thymosin alpha-1] Prothymosin alpha Prothymosin alpha "Hypothetical protein PTMAP7 (Prothymosin, alpha) (Gene sequence 28) (Prothymosin, alpha (Gene sequence 28) variant) "	10	0.914	10	0.921	0.057	1
198	trm|Q9UM05|Q9UM05_HUMAN trm|Q17RR5|Q17RR5_HUMAN trm|Q5XG74|Q5XG74_HUMAN trm|Q7LCX9|Q7LCX9_HUMAN trm|O94979|O94979_HUMAN trm|Q9UM06|Q9UM06_HUMAN	ABP130 SEC31A protein SEC31A protein Sec31 protein KIAA0905 protein (Fragment) ABP125	2	1.117	4	0.935
199	spt|Q05682|CALD1_HUMAN trm|Q9NYG1|Q9NYG1_HUMAN	Caldesmon (CDM) NAG22 protein	9	0.855	9	0.873	0.116	1
200	spt|P14868|SYDC_HUMAN trm|Q68CR9|Q68CR9_HUMAN	Aspartyl-tRNA synthetase, cytoplasmic (EC 6.1.1.12) (Aspartate--tRNA ligase) (AspRS) (Cell proliferation-inducing gene 40 protein) Hypothetical protein DKFZp781B11202	4	0.866	5	0.817	-0.448	1
201	trm|Q53FR4|Q53FR4_HUMAN spt|Q96QK1|VPS35_HUMAN trm|Q0JS99|Q0JS99_HUMAN	Vacuolar protein sorting 35 variant (Fragment) Vacuolar protein sorting-associated protein 35 (Vesicle protein sorting 35) (hVPS35) (Maternal-embryonic 3) Hypothetical protein VPS35 (Fragment)	1	1.251	2	1.214
202	trm|Q5JSI3|Q5JSI3_HUMAN trm|Q59GX6|Q59GX6_HUMAN spt|O00571|DDX3X_HUMAN	DEAD (Asp-Glu-Ala-Asp) box polypeptide 3, X-linked DEAD/H (Asp-Glu-Ala-Asp/His) box polypeptide 3 variant (Fragment) "ATP-dependent RNA helicase DDX3X (EC 3.6.1.-) (DEAD box protein 3, X- chromosomal) (Helicase-like protein 2) (HLP2) (DEAD box, X isoform) "	1	1.041	2	1.368
203	spt|Q12906|ILF3_HUMAN	Interleukin enhancer-binding factor 3 (Nuclear factor of activated T- cells 90 kDa) (NF-AT-90) (Double-stranded RNA-binding protein 76) (DRBP76) (Translational control protein 80) (TCP80) (Nuclear factor associated with dsRNA) (NFAR) (M-phase phosphoprotein 4) (MPP4)	6	1.183	5	1.785	1.871	0.05
204	spt|P62249|RS16_HUMAN	40S ribosomal protein S16	3	0.924	3	1.571	3.305	0.025
205	trm|Q6DHV4|Q6DHV4_HUMAN spt|P07384|CAN1_HUMAN	CAPN1 protein Calpain-1 catalytic subunit (EC 3.4.22.52) (Calpain-1 large subunit) (Calcium-activated neutral proteinase 1) (CANP 1) (Calpain mu-type) (muCANP) (Micromolar-calpain)	7	0.948	8	1.319	2.565	0.025
206	spt|P36955|PEDF_HUMAN	Pigment epithelium-derived factor precursor (PEDF) (Serpin-F1) (EPC- 1)	3	1.236	3	0.636	-4.902	0.005
207	trm|Q6IBS9|Q6IBS9_HUMAN spt|Q99714|HCD2_HUMAN	HADH2 protein (Hydroxyacyl-Coenzyme A dehydrogenase, type II) 3-hydroxyacyl-CoA dehydrogenase type-2 (EC 1.1.1.35) (3-hydroxyacyl- CoA dehydrogenase type II) (Type II HADH) (3-hydroxy-2-methylbutyryl- CoA dehydrogenase) (EC 1.1.1.178) (Endoplasmic reticulum-associated amyloid beta-peptide-binding protein) (Short-chain type dehydrogenase/reductase XH98G2)	8	0.918	7	0.981	0.455	1
208	trm|Q8WU39|Q8WU39_HUMAN	PACAP protein	1	1.321	2	2.21
209	spt|Q9UQ80|PA2G4_HUMAN	Proliferation-associated protein 2G4 (Cell cycle protein p38-2G4 homolog) (hG4-1) (ErbB3-binding protein 1)	1	1.042	2	0.977
210	trm|Q6NTA2|Q6NTA2_HUMAN spt|P14866|HNRPL_HUMAN	HNRPL protein Heterogeneous nuclear ribonucleoprotein L (hnRNP L)	3	0.853	3	1.32	5.144	0.005
211	trm|Q5SZY0|Q5SZY0_HUMAN spt|P49368|TCPG_HUMAN trm|Q59H77|Q59H77_HUMAN	Chaperonin containing TCP1, subunit 3 (Gamma) T-complex protein 1 subunit gamma (TCP-1-gamma) (CCT-gamma) (hTRiC5) "Chaperonin containing TCP1, subunit 3 (Gamma) variant (Fragment) "	7	1.111	5	1.09	-0.212	1
212	spt|P08311|CATG_HUMAN	Cathepsin G precursor (EC 3.4.21.20) (CG)	3	1.067	3	2.017	3.484	0.025
213	trm|Q9UJY7|Q9UJY7_HUMAN trm|Q96D94|Q96D94_HUMAN trm|Q969E7|Q969E7_HUMAN trm|Q99628|Q99628_HUMAN trm|Q9UHX1|Q9UHX1_HUMAN trm|Q9NZA0|Q9NZA0_HUMAN	Poly-U binding splicing factor PUF60 (Fragment) SIAHBP1 protein SIAHBP1 protein Siah binding protein 1 (Fragment) Ro ribonucleoprotein-binding protein 1 (SIAHBP1 protein) FBP-interacting repressor (Fuse-binding protein-interacting repressor)	0		4	1.078
214	trm|Q59ER3|Q59ER3_HUMAN spt|Q01082|SPTB2_HUMAN trm|Q53R99|Q53R99_HUMAN	Spectrin, beta, non-erythrocytic 1 isoform 1 variant (Fragment) "Spectrin beta chain, brain 1 (Spectrin, non-erythroid beta chain 1) (Beta-II spectrin) (Fodrin beta chain) " Hypothetical protein SPTBN1 (Fragment)	1	1.029	2	1.942
215	spt|P20160|CAP7_HUMAN	Azurocidin precursor (Cationic antimicrobial protein CAP37) (Heparin- binding protein) (HBP)	1	1.12	2	6.015
216	trm|Q9Y3B5|Q9Y3B5_HUMAN trm|Q96CN7|Q96CN7_HUMAN	CGI-111 protein ISOC1 protein	6	1.008	6	0.865	-2.263	0.025
217	trm|Q9UNM1|Q9UNM1_HUMAN trm|Q53X54|Q53X54_HUMAN spt|P61604|CH10_HUMAN	Chaperonin 10-related protein (Fragment) HSPE1 protein (Hypothetical protein HSPE1) (Fragment) "10 kDa heat shock protein, mitochondrial (Hsp10) (10 kDa chaperonin) (CPN10) (Early-pregnancy factor) (EPF) "	10	0.955	10	1.197	2.647	0.01
218	spt|P02790|HEMO_HUMAN trm|Q9BS19|Q9BS19_HUMAN	Hemopexin precursor (Beta-1B-glycoprotein) HPX protein	7	1.036	5	0.7	-2.661	0.025
219	trm|Q53YD7|Q53YD7_HUMAN spt|P26641|EF1G_HUMAN	Eukaryotic translation elongation factor 1 gamma (GIG35) (EEF1G protein) Elongation factor 1-gamma (EF-1-gamma) (eEF-1B gamma)	10	0.934	10	1.08	2.372	0.025
220	spt|P46782|RS5_HUMAN	40S ribosomal protein S5	6	0.909	3	1.612	3.8	0.005
221	spt|Q14247|SRC8_HUMAN	Src substrate cortactin (Amplaxin) (Oncogene EMS1)	5	0.99	5	0.605	-1.148	0.15
222	spt|Q15019|SEPT2_HUMAN trm|Q53QU3|Q53QU3_HUMAN	Septin-2 (Protein NEDD5) Hypothetical protein NEDD5 (Fragment)	8	0.846	7	0.722	-1.212	0.15
223	spt|P14174|MIF_HUMAN	Macrophage migration inhibitory factor (MIF) (Phenylpyruvate tautomerase) (EC 5.3.2.1) (Glycosylation-inhibiting factor) (GIF)	9	0.997	9	1.132	0.911	0.2
224	spt|O60664|M6PBP_HUMAN	Mannose-6-phosphate receptor-binding protein 1 (Cargo selection protein TIP47) (47 kDa mannose 6-phosphate receptor-binding protein) (47 kDa MPR-binding protein) (Placental protein 17) (PP17)	9	0.901	9	1.118	1.75	0.05
225	spt|O95865|DDAH2_HUMAN	NG,NG-dimethylarginine dimethylaminohydrolase 2 (EC 3.5.3.18) (Dimethylargininase-2) (Dimethylarginine dimethylaminohydrolase 2) (DDAHII) (S-phase protein) (Protein G6a)	7	1.181	7	0.905	-1.705	0.1
226	trm|Q4LE83|Q4LE83_HUMAN	FASN variant protein (Fragment)	2	0.986	4	1.455
227	trm|Q4LE36|Q4LE36_HUMAN spt|P53396|ACLY_HUMAN	ACLY variant protein (Fragment) ATP-citrate synthase (EC 2.3.3.8) (ATP-citrate (pro-S-)-lyase) (Citrate cleavage enzyme)	4	1.033	6	1.562	1.035	0.2
228	spt|Q15233|NONO_HUMAN	Non-POU domain-containing octamer-binding protein (NonO protein) (54 kDa nuclear RNA- and DNA-binding protein) (p54(nrb)) (p54nrb) (55 kDa nuclear protein) (NMT55) (DNA-binding p52/p100 complex, 52 kDa subunit)	3	1.153	3	1.692	1.95	0.1
229	spt|P00390|GSHR_HUMAN	Glutathione reductase, mitochondrial precursor (EC 1.8.1.7) (GR) (GRase)	4	1.012	5	1.584	1.874	0.1
230	spt|Q09666|AHNK_HUMAN	Neuroblast differentiation-associated protein AHNAK (Desmoyokin) (Fragments)	10	1.025	10	0.86	-2.105	0.025
231	spt|Q01518|CAP1_HUMAN	Adenylyl cyclase-associated protein 1 (CAP 1)	7	1.053	5	1.427	4.085	0.002
232	spt|P47755|CAZA2_HUMAN	F-actin capping protein alpha-2 subunit (CapZ alpha-2)	6	1.283	9	1.333	0.279	1
233	trm|Q4W4Y1|Q4W4Y1_HUMAN spt|Q8WUM4|PDC6I_HUMAN trm|Q6NUS1|Q6NUS1_HUMAN	Dopamine receptor interacting protein 4 Programmed cell death 6-interacting protein (PDCD6-interacting protein) (ALG-2-interacting protein 1) (Hp95) PDCD6IP protein	5	0.911	4	0.87	-0.533	1
234	trm|Q53QM2|Q53QM2_HUMAN spt|P61158|ARP3_HUMAN	Hypothetical protein ACTR3 Actin-like protein 3 (Actin-related protein 3)	2	0.793	2	1.168
235	spt|P07910|HNRPC_HUMAN	Heterogeneous nuclear ribonucleoproteins C1/C2 (hnRNP C1 / hnRNP C2)	10	0.895	10	1.149	2.039	0.05
236	trm|Q59FG9|Q59FG9_HUMAN spt|P13611|CSPG2_HUMAN	Chondroitin sulfate proteoglycan 2 (Versican) variant (Fragment) Versican core protein precursor (Large fibroblast proteoglycan) (Chondroitin sulfate proteoglycan core protein 2) (PG-M) (Glial hyaluronate-binding protein) (GHAP)	4	1.009	2	0.523
237	spt|Q15717|ELAV1_HUMAN	ELAV-like protein 1 (Hu-antigen R) (HuR)	3	1.305	4	1.123	-0.568	1
238	trm|Q6NZ55|Q6NZ55_HUMAN trm|Q567Q8|Q567Q8_HUMAN spt|P26373|RL13_HUMAN	Ribosomal protein L13 RPL13 protein 60S ribosomal protein L13 (Breast basic conserved protein 1)	1	0.91	2	1.291
239	spt|P78371|TCPB_HUMAN	T-complex protein 1 subunit beta (TCP-1-beta) (CCT-beta)	8	0.952	8	1.146	1.074	0.2
240	trm|Q9HBB3|Q9HBB3_HUMAN trm|Q8TBK5|Q8TBK5_HUMAN trm|Q8N5Z7|Q8N5Z7_HUMAN spt|Q02878|RL6_HUMAN	DNA-binding protein TAXREB107 Ribosomal protein L6 Ribosomal protein L6 60S ribosomal protein L6 (TAX-responsive enhancer element-binding protein 107) (TAXREB107) (Neoplasm-related protein C140)	3	1.116	3	2.046	9.073	0
241	spt|P62158|CALM_HUMAN	Calmodulin (CaM)	8	1.236	7	1.026	-0.746	0.25
242	spt|P61626|LYSC_HUMAN	Lysozyme C precursor (EC 3.2.1.17) (1,4-beta-N-acetylmuramidase C)	1	1.151	2	2.093
243	spt|P62851|RS25_HUMAN	40S ribosomal protein S25	5	1.061	6	1.906	2.863	0.01
244	trm|Q8WZ56|Q8WZ56_HUMAN spt|P62714|PP2AB_HUMAN trm|Q5U0I7|Q5U0I7_HUMAN	Protein phosphatase type 2A catalytic subunit Serine/threonine-protein phosphatase 2A catalytic subunit beta isoform (EC 3.1.3.16) (PP2A-beta) "Protein phosphatase 2 (Formerly 2A), catalytic subunit, beta isoform "	2	0.89	4	0.981
245	spt|Q00610|CLH1_HUMAN	Clathrin heavy chain 1 (CLH-17)	7	0.995	5	1.118	0.67	1
246	trm|Q6IB06|Q6IB06_HUMAN trm|Q53EW8|Q53EW8_HUMAN spt|Q16762|THTR_HUMAN	TST protein Thiosulfate sulfurtransferase variant (Fragment) Thiosulfate sulfurtransferase (EC 2.8.1.1) (Rhodanese)	3	0.976	3	0.985	0.063	1
247	spt|P30050|RL12_HUMAN trm|Q59FI9|Q59FI9_HUMAN	60S ribosomal protein L12 Ribosomal protein L12 variant (Fragment)	1	0.749	2	2.432
248	spt|Q15274|NADC_HUMAN	Nicotinate-nucleotide pyrophosphorylase [carboxylating] (EC 2.4.2.19) (Quinolinate phosphoribosyltransferase [decarboxylating]) (QAPRTase) (QPRTase)	8	1.09	7	0.945	-1.464	0.1
249	spt|P00352|AL1A1_HUMAN	Retinal dehydrogenase 1 (EC 1.2.1.36) (RalDH1) (RALDH 1) (Aldehyde dehydrogenase family 1 member A1) (Aldehyde dehydrogenase, cytosolic) (ALHDII) (ALDH-E1)	9	0.912	7	1.006	0.602	1
250	trm|Q53ET4|Q53ET4_HUMAN trm|Q5BJF5|Q5BJF5_HUMAN trm|Q8N1A5|Q8N1A5_HUMAN spt|P34897|GLYM_HUMAN trm|Q5HYG8|Q5HYG8_HUMAN	Serine hydroxymethyltransferase 2 (Mitochondrial) variant (Fragment) SHMT2 protein (Fragment) SHMT2 protein "Serine hydroxymethyltransferase, mitochondrial precursor (EC 2.1.2.1) (Serine methylase) (Glycine hydroxymethyltransferase) (SHMT) " Hypothetical protein DKFZp686P09201	1	1.306	2	0.959
251	trm|Q3MNF1|Q3MNF1_HUMAN trm|Q3MNF0|Q3MNF0_HUMAN spt|P35749|MYH11_HUMAN trm|Q3MIV8|Q3MIV8_HUMAN	Smooth muscle myosin heavy chain isoform SM1 Smooth muscle myosin heavy chain isoform SM2 "Myosin-11 (Myosin heavy chain, smooth muscle isoform) (SMMHC) " "Myosin, heavy polypeptide 11, smooth muscle "	0		3	1.944
252	spt|Q86U42|PABP2_HUMAN	Polyadenylate-binding protein 2 (Poly(A)-binding protein 2) (Poly(A)- binding protein II) (PABII) (Polyadenylate-binding nuclear protein 1) (Nuclear poly(A)-binding protein 1)	4	0.938	5	1.207	4.629	0.002
253	trm|Q6FIE7|Q6FIE7_HUMAN spt|P62820|RAB1A_HUMAN trm|Q5U0I6|Q5U0I6_HUMAN	RAB1A protein (Hypothetical protein RAB1A) Ras-related protein Rab-1A (YPT1-related protein) "RAB1A, member RAS oncogene family (RAB1A protein) "	5	0.79	2	3.031
254	trm|Q5T937|Q5T937_HUMAN trm|O60744|O60744_HUMAN spt|P10599|THIO_HUMAN trm|Q5T936|Q5T936_HUMAN	Thioredoxin (TXN protein) Thioredoxin delta 3 (Fragment) Thioredoxin (Trx) (ATL-derived factor) (ADF) (Surface-associated sulphydryl protein) (SASP) Thioredoxin	10	0.981	10	0.883	-1.138	0.15
255	trm|Q5SUJ3|Q5SUJ3_HUMAN spt|P62269|RS18_HUMAN	Ribosomal protein S18 40S ribosomal protein S18 (Ke-3) (Ke3)	2	1.068	4	1.206
256	trm|Q6IRT1|Q6IRT1_HUMAN spt|P11766|ADHX_HUMAN trm|Q5U043|Q5U043_HUMAN trm|Q6FI45|Q6FI45_HUMAN	ADH5 protein (Fragment) Alcohol dehydrogenase class 3 chi chain (EC 1.1.1.1) (Alcohol dehydrogenase class III chi chain) (S-(hydroxymethyl)glutathione dehydrogenase) (EC 1.1.1.284) (Glutathione-dependent formaldehyde dehydrogenase) (FDH) "Alcohol dehydrogenase 5 (Class III), chi polypeptide " ADH5 protein	6	1.02	3	1.051	0.224	1
257	spt|P35270|SPRE_HUMAN	Sepiapterin reductase (EC 1.1.1.153) (SPR)	1	0.845	2	0.71
258	spt|Q14847|LASP1_HUMAN	LIM and SH3 domain protein 1 (LASP-1) (MLN 50)	5	1.013	4	1.053	0.281	1
259	spt|P16949|STMN1_HUMAN	Stathmin (Phosphoprotein p19) (pp19) (Oncoprotein 18) (Op18) (Leukemia-associated phosphoprotein p18) (pp17) (Prosolin) (Metablastin) (Protein Pr22)	6	0.983	9	1.008	0.083	1
260	trm|Q59ET3|Q59ET3_HUMAN spt|P40227|TCPZ_HUMAN trm|Q3KP28|Q3KP28_HUMAN	Chaperonin containing TCP1, subunit 6A isoform a variant (Fragment) T-complex protein 1 subunit zeta (TCP-1-zeta) (CCT-zeta) (CCT-zeta-1) (Tcp20) (HTR3) (Acute morphine dependence-related protein 2) "Chaperonin containing TCP1, subunit 6A (Zeta 1) "	3	1.162	3	1.042	-0.748	0.25
261	spt|Q15435|PP1R7_HUMAN	Protein phosphatase 1 regulatory subunit 7 (Protein phosphatase 1 regulatory subunit 22)	4	1.125	3	1.481	0.442	1
262	trm|Q68DQ7|Q68DQ7_HUMAN	Hypothetical protein DKFZp686E12175	0		2	5.571
263	spt|Q16629|SFRS7_HUMAN	Splicing factor, arginine/serine-rich 7 (Splicing factor 9G8)	2	0.884	4	1.443
264	spt|Q15102|PA1B3_HUMAN	Platelet-activating factor acetylhydrolase IB subunit gamma (EC 3.1.1.47) (PAF acetylhydrolase 29 kDa subunit) (PAF-AH 29 kDa subunit) (PAF-AH subunit gamma) (PAFAH subunit gamma)	4	1.011	5	1.553	7.888	0
265	spt|P46781|RS9_HUMAN	40S ribosomal protein S9	1	0.631	2	2.823
266	trm|Q1HE25|Q1HE25_HUMAN spt|P12814|ACTN1_HUMAN	Actinin alpha 1 isoform b Alpha-actinin-1 (Alpha-actinin cytoskeletal isoform) (Non-muscle alpha-actinin-1) (F-actin cross-linking protein)	8	0.936	7	0.801	-1.528	0.1
267	trm|Q53FN0|Q53FN0_HUMAN spt|Q01130|SFRS2_HUMAN trm|Q8NAK9|Q8NAK9_HUMAN	Splicing factor, arginine/serine-rich 2 variant (Fragment) "Splicing factor, arginine/serine-rich 2 (Splicing factor SC35) (SC-35) (Splicing component, 35 kDa) (Protein PR264) " "CDNA FLJ35170 fis, clone PLACE6012942, highly similar to SPLICING FACTOR, ARGININE/SERINE-RICH 2 "	5	1.085	4	1.171	0.445	1
268	spt|Q13263|TIF1B_HUMAN	Transcription intermediary factor 1-beta (TIF1-beta) (Tripartite motif-containing protein 28) (Nuclear corepressor KAP-1) (KRAB- associated protein 1) (KAP-1) (KRAB-interacting protein 1) (KRIP-1) (RING finger protein 96)	8	1.059	7	1.22	0.76	0.25
269	trm|Q14477|Q14477_HUMAN	HBB protein (Fragment)	2	0.759	4	0.495
270	spt|P68032|ACTC_HUMAN spt|P63267|ACTH_HUMAN spt|P62736|ACTA_HUMAN	Actin, alpha cardiac (Alpha-cardiac actin) "Actin, gamma-enteric smooth muscle (Smooth muscle gamma actin) (Gamma- 2-actin) (Alpha-actin-3) " "Actin, aortic smooth muscle (Alpha-actin-2) "	7	0.996	8	0.906	-0.463	1
271	spt|Q9Y4L1|OXRP_HUMAN trm|Q53H25|Q53H25_HUMAN	150 kDa oxygen-regulated protein precursor (Orp150) (Hypoxia up- regulated 1) Oxygen regulated protein variant (Fragment)	7	1.117	5	1.274	1.124	0.15
272	spt|P41250|SYG_HUMAN trm|Q7Z5H0|Q7Z5H0_HUMAN	Glycyl-tRNA synthetase (EC 6.1.1.14) (Glycine--tRNA ligase) (GlyRS) GARS protein	0		0
273	spt|P21281|VATB2_HUMAN	Vacuolar ATP synthase subunit B, brain isoform (EC 3.6.3.14) (V-ATPase B2 subunit) (Vacuolar proton pump B isoform 2) (Endomembrane proton pump 58 kDa subunit) (HO57)	2	0.999	4	1.643
274	spt|Q15181|IPYR_HUMAN	Inorganic pyrophosphatase (EC 3.6.1.1) (Pyrophosphate phospho- hydrolase) (PPase)	10	1.01	10	1.096	0.781	0.25
275	spt|P49588|SYAC_HUMAN	Alanyl-tRNA synthetase, cytoplasmic (EC 6.1.1.7) (Alanine--tRNA ligase) (AlaRS) (NY-REN-42 antigen)	2	0.977	4	0.931
276	trm|Q59G88|Q59G88_HUMAN spt|P31146|COR1A_HUMAN trm|Q2YD73|Q2YD73_HUMAN	Hypothetical protein (Fragment) Coronin-1A (Coronin-like protein p57) (Coronin-like protein A) (CLIPINA) (Tryptophan aspartate-containing coat protein) (TACO) "Coronin, actin binding protein, 1A "	4	0.841	2	1.4
277	trm|Q5TCU3|Q5TCU3_HUMAN	Tropomyosin 2 (Beta)	9	0.802	9	0.767	-0.161	1
278	trm|Q5VX86|Q5VX86_HUMAN spt|P09874|PARP1_HUMAN	Poly (ADP-ribose) polymerase family, member 1 Poly [ADP-ribose] polymerase 1 (EC 2.4.2.30) (PARP-1) (ADPRT) (NAD(+) ADP-ribosyltransferase 1) (Poly[ADP-ribose] synthetase 1)	1	2.058	2	1.679
279	spt|P19971|TYPH_HUMAN	Thymidine phosphorylase precursor (EC 2.4.2.4) (TdRPase) (TP) (Platelet-derived endothelial cell growth factor) (PD-ECGF) (Gliostatin)	2	1.308	4	1.515
280	trm|Q8WVX7|Q8WVX7_HUMAN spt|P39019|RS19_HUMAN	Ribosomal protein S19 (Fragment) 40S ribosomal protein S19	0		2	1.948
281	spt|P07437|TBB2_HUMAN	Tubulin beta-2 chain	10	1.04	10	0.88	-2.704	0.01
282	spt|Q07955|SFRS1_HUMAN trm|Q59FA2|Q59FA2_HUMAN	Splicing factor, arginine/serine-rich 1 (pre-mRNA-splicing factor SF2, P33 subunit) (Alternative-splicing factor 1) (ASF-1) "Splicing factor, arginine/serine-rich 1 (Splicing factor 2, alternate splicing factor) variant (Fragment) "	4	0.969	8	1.108	0.592	1
283	spt|Q14974|IMB1_HUMAN	Importin beta-1 subunit (Karyopherin beta-1 subunit) (Nuclear factor P97) (Importin 90)	2	1.763	4	1.692
284	trm|Q6DEN2|Q6DEN2_HUMAN	DPYSL3 protein	7	0.931	8	0.733	-1.125	0.15
285	trm|Q6FGY5|Q6FGY5_HUMAN spt|Q99426|TBCB_HUMAN	CKAP1 protein Tubulin-specific chaperone B (Tubulin folding cofactor B) (Cytoskeleton-associated protein 1) (Cytoskeleton-associated protein CKAPI)	5	1.036	7	0.775	-1.816	0.05
286	spt|P14314|GLU2B_HUMAN	Glucosidase 2 subunit beta precursor (Glucosidase II subunit beta) (Protein kinase C substrate, 60.1 kDa protein, heavy chain) (PKCSH) (80K-H protein)	9	0.987	8	0.763	-2.03	0.05
287	spt|Q08380|LG3BP_HUMAN	Galectin-3-binding protein precursor (Lectin galactoside-binding soluble 3-binding protein) (Mac-2-binding protein) (Mac-2 BP) (MAC2BP) (Tumor-associated antigen 90K)	4	1.006	5	1.365	2.008	0.05
288	spt|Q9H0W9|CK054_HUMAN	Ester hydrolase C11orf54 (EC 3.1.-.-)	6	0.872	4	1.015	0.645	1
289	spt|P04080|CYTB_HUMAN	Cystatin B (Liver thiol proteinase inhibitor) (CPI-B) (Stefin B)	5	0.953	4	1.358	2.273	0.05
290	spt|P31946|1433B_HUMAN	14-3-3 protein beta/alpha (Protein kinase C inhibitor protein 1) (KCIP-1) (Protein 1054)	9	1.05	10	1.091	0.192	1
291	trm|Q0JV76|Q0JV76_HUMAN spt|Q8N163|K1967_HUMAN trm|Q0JS16|Q0JS16_HUMAN	Hypothetical protein KIAA1967 (Fragment) Protein KIAA1967 (Deleted in breast cancer gene 1 protein) (DBC.1) (DBC-1) (p30 DBC) Hypothetical protein KIAA1967 (Fragment)	2	0.958	4	1.297
292	spt|P48637|GSHB_HUMAN	Glutathione synthetase (EC 6.3.2.3) (Glutathione synthase) (GSH synthetase) (GSH-S)	3	1.009	6	1.174	0.842	0.25
293	spt|P01011|AACT_HUMAN trm|Q2TU87|Q2TU87_HUMAN	Alpha-1-antichymotrypsin precursor (ACT) [Contains: Alpha-1- antichymotrypsin His-Pro-less] Growth-inhibiting protein 25	5	1	4	0.488	-4.027	0.005
294	trm|Q0QEW2|Q0QEW2_HUMAN spt|Q07020|RL18_HUMAN	Ribosomal protein L18 (Fragment) 60S ribosomal protein L18	4	0.835	5	1.66	3.254	0.01
295	spt|Q08257|QOR_HUMAN	Quinone oxidoreductase (EC 1.6.5.5) (NADPH:quinone reductase) (Zeta- crystallin)	8	0.939	7	1.176	0.882	0.2
296	trm|Q3MIH3|Q3MIH3_HUMAN	Ubiquitin A-52 residue ribosomal protein fusion product 1	3	0.854	3	1.398	7.658	0.001
297	trm|Q6IBN0|Q6IBN0_HUMAN trm|Q8N9M2|Q8N9M2_HUMAN trm|Q96N86|Q96N86_HUMAN spt|O43242|PSMD3_HUMAN	PSMD3 protein "CDNA FLJ36887 fis, clone BNGH42005504, highly similar to 26S PROTEASOME REGULATORY SUBUNIT S3 " "CDNA FLJ31237 fis, clone KIDNE2004846, highly similar to 26S PROTEASOME REGULATORY SUBUNIT S3 " 26S proteasome non-ATPase regulatory subunit 3 (26S proteasome regulatory subunit S3) (Proteasome subunit p58)	0		0
298	trm|Q53FT5|Q53FT5_HUMAN spt|O00231|PSD11_HUMAN	Proteasome 26S non-ATPase subunit 11 variant (Fragment) 26S proteasome non-ATPase regulatory subunit 11 (26S proteasome regulatory subunit S9) (26S proteasome regulatory subunit p44.5)	1	1.088	3	1.633
299	trm|Q9BR63|Q9BR63_HUMAN spt|Q9NSD9|SYFB_HUMAN	FARSLB protein (Fragment) Phenylalanyl-tRNA synthetase beta chain (EC 6.1.1.20) (Phenylalanine-- tRNA ligase beta chain) (PheRS)	4	1.071	5	0.934	-0.817	0.25
300	trm|Q4VXG8|Q4VXG8_HUMAN spt|Q16401|PSMD5_HUMAN	Proteasome (Prosome, macropain) 26S subunit, non-ATPase, 5 26S proteasome non-ATPase regulatory subunit 5 (26S proteasome subunit S5B) (26S protease subunit S5 basic)	0		2	2.713
301	trm|Q53H94|Q53H94_HUMAN spt|Q02252|MMSA_HUMAN trm|Q53FN8|Q53FN8_HUMAN	Aldehyde dehydrogenase 6A1 variant (Fragment) "Methylmalonate-semialdehyde dehydrogenase [acylating], mitochondrial precursor (EC 1.2.1.27) (MMSDH) (Malonate-semialdehyde dehydrogenase [acylating]) (EC 1.2.1.18) " Aldehyde dehydrogenase 6A1 variant (Fragment)	6	0.922	3	0.686	-2.146	0.05
302	trm|Q5U000|Q5U000_HUMAN spt|Q9UBR2|CATZ_HUMAN	Cathepsin Z Cathepsin Z precursor (EC 3.4.22.-) (Cathepsin X) (Cathepsin P)	5	1.014	4	1.309	1.644	0.1
303	spt|P59665|DEF1_HUMAN spt|P59666|DEF3_HUMAN	Neutrophil defensin 1 precursor (HNP-1) (HP-1) (HP1) (Defensin, alpha 1) [Contains: HP 1-56; Neutrophil defensin 2 (HNP-2) (HP-2) (HP2)] "Neutrophil defensin 3 precursor (HNP-3) (HP-3) (HP3) (Defensin, alpha 3) [Contains: HP 3-56; Neutrophil defensin 2 (HNP-2) (HP-2) (HP2)] "	3	1.026	3	5.096	4.437	0.01
304	trm|Q6N093|Q6N093_HUMAN	Hypothetical protein DKFZp686I04196 (Fragment)	10	0.882	10	0.418	-4.344	0
305	trm|Q8NEK0|Q8NEK0_HUMAN	IGKV1-5 protein	2	1.525	4	0.605
306	spt|Q15417|CNN3_HUMAN	Calponin-3 (Calponin, acidic isoform)	4	0.977	5	0.739	-1.356	0.15
307	spt|Q12888|TP53B_HUMAN	Tumor suppressor p53-binding protein 1 (p53-binding protein 1) (p53BP1) (53BP1)	0		2	0.897
308	spt|Q99613|IF38_HUMAN	Eukaryotic translation initiation factor 3 subunit 8 (eIF3 p110) (eIF3c)	3	0.998	2	9.525
309	trm|Q6FG59|Q6FG59_HUMAN spt|Q16543|CDC37_HUMAN	CDC37 protein Hsp90 co-chaperone Cdc37 (Hsp90 chaperone protein kinase-targeting subunit) (p50Cdc37)	7	0.985	7	1.083	0.833	0.25
310	spt|P24752|THIL_HUMAN trm|Q96FG8|Q96FG8_HUMAN	Acetyl-CoA acetyltransferase, mitochondrial precursor (EC 2.3.1.9) (Acetoacetyl-CoA thiolase) (T2) ACAT1 protein	3	1.08	1	3.2
311	trm|Q0VDC6|Q0VDC6_HUMAN trm|Q4VC47|Q4VC47_HUMAN spt|P62942|FKB1A_HUMAN	FKBP1A protein FKBP1A protein (Fragment) FK506-binding protein 1A (EC 5.2.1.8) (Peptidyl-prolyl cis-trans isomerase) (PPIase) (Rotamase) (12 kDa FKBP) (FKBP-12) (Immunophilin FKBP12)	10	1.095	10	1.139	0.226	1
312	spt|P53004|BIEA_HUMAN	Biliverdin reductase A precursor (EC 1.3.1.24) (Biliverdin-IX alpha- reductase) (BVR A)	1	0.992	2	0.932
313	spt|O00151|PDLI1_HUMAN	PDZ and LIM domain protein 1 (Elfin) (LIM domain protein CLP-36) (C- terminal LIM domain protein 1)	6	1.136	8	0.798	-1.74	0.1
314	trm|Q5U0E9|Q5U0E9_HUMAN spt|P62633|CNBP_HUMAN trm|Q4JGY0|Q4JGY0_HUMAN trm|Q4JGY1|Q4JGY1_HUMAN	Zinc finger protein 9 (A cellular retroviral nucleic acid binding protein) (Cellular nucleic acid binding protein alpha variant 1) Cellular nucleic acid-binding protein (CNBP) (Zinc finger protein 9) Cellular nucleic acid binding protein beta variant 2 Cellular nucleic acid binding protein beta variant 1	4	1.312	2	1.171
315	spt|P04004|VTNC_HUMAN	Vitronectin precursor (Serum-spreading factor) (S-protein) (V75) [Contains: Vitronectin V65 subunit; Vitronectin V10 subunit; Somatomedin B]	6	1.17	4	0.814	-1.396	0.15
316	spt|Q99733|NP1L4_HUMAN	Nucleosome assembly protein 1-like 4 (Nucleosome assembly protein 2) (NAP2)	3	1.189	4	1.795	0.633	1
317	spt|P17987|TCPA_HUMAN	T-complex protein 1 subunit alpha (TCP-1-alpha) (CCT-alpha)	4	1.099	5	1.002	-0.945	0.2
318	trm|Q6IPH7|Q6IPH7_HUMAN	RPL14 protein (Ribosomal protein L14 variant)	1	2.677	2	1.666
319	trm|Q5HYC1|Q5HYC1_HUMAN spt|P10909|CLUS_HUMAN	Hypothetical protein DKFZp686L07235 "Clusterin precursor (Complement-associated protein SP-40,40) (Complement cytolysis inhibitor) (CLI) (NA1/NA2) (Apolipoprotein J) (Apo-J) (Testosterone-repressed prostate message 2) (TRPM-2) [Contains: Clusterin beta chain (ApoJalpha) (Complement cytolysis inhibitor a chain); Clusterin alpha chain (ApoJbeta) (Complement cytolysis inhibitor b chain)] "	7	1.1	5	1.031	-0.301	1
320	spt|P05387|RLA2_HUMAN	60S acidic ribosomal protein P2 (NY-REN-44 antigen)	4	1.221	3	2.077	2.249	0.05
321	trm|Q5VWX2|Q5VWX2_HUMAN spt|O94760|DDAH1_HUMAN	Dimethylarginine dimethylaminohydrolase 1 "NG,NG-dimethylarginine dimethylaminohydrolase 1 (EC 3.5.3.18) (Dimethylargininase-1) (Dimethylarginine dimethylaminohydrolase 1) (DDAHI) (DDAH-1) "	2	0.896	5	0.719
322	trm|Q5JR08|Q5JR08_HUMAN spt|P61586|RHOA_HUMAN spt|P08134|RHOC_HUMAN trm|Q53HM4|Q53HM4_HUMAN	Ras homolog gene family, member C (Fragment) Transforming protein RhoA precursor (H12) Rho-related GTP-binding protein RhoC precursor (H9) "Ras homolog gene family, member A variant (Fragment) "	7	0.875	5	0.969	1.177	0.15
323	spt|P20774|MIME_HUMAN trm|Q7Z532|Q7Z532_HUMAN trm|Q5TBF5|Q5TBF5_HUMAN	Mimecan precursor (Osteoglycin) (Osteoinductive factor) (OIF) Osteoglycin OG "Osteoglycin (Osteoinductive factor, mimecan) (Fragment) "	5	0.838	4	0.641	-1.119	0.2
324	trm|Q0JU36|Q0JU36_HUMAN trm|Q9NZL9|Q9NZL9_HUMAN trm|Q9BS89|Q9BS89_HUMAN trm|Q567T7|Q567T7_HUMAN trm|Q1WAI7|Q1WAI7_HUMAN trm|Q9UJ54|Q9UJ54_HUMAN	Hypothetical protein MAT2B (Fragment) Methionine adenosyltransferase regulatory beta subunit (Hypothetical protein MAT2B) (Hypothetical protein DKFZp564B246) "Methionine adenosyltransferase II, beta " "Methionine adenosyltransferase II, beta " Methionine adenosyltransferase II beta variant 2 DTDP-4-keto-6-deoxy-D-glucose 4-reductase (MAT2B)	3	0.989	6	1.118	0.891	0.25
325	spt|P15374|UCHL3_HUMAN	Ubiquitin carboxyl-terminal hydrolase isozyme L3 (EC 3.4.19.12) (UCH- L3) (Ubiquitin thioesterase L3)	1	1.231	2	1.19
326	trm|Q6FGD7|Q6FGD7_HUMAN spt|O75347|TBCA_HUMAN	TBCA protein (Tubulin-specific chaperone a) Tubulin-specific chaperone A (Tubulin-folding cofactor A) (CFA) (TCP1- chaperonin cofactor A)	6	0.941	6	1.102	0.921	0.2
327	trm|Q5U0A0|Q5U0A0_HUMAN spt|P28066|PSA5_HUMAN	Proteasome (Prosome, macropain) subunit, alpha type, 5 Proteasome subunit alpha type 5 (EC 3.4.25.1) (Proteasome zeta chain) (Macropain zeta chain) (Multicatalytic endopeptidase complex zeta chain)	5	0.954	9	1.123	1.446	0.1
328	spt|P52566|GDIS_HUMAN	Rho GDP-dissociation inhibitor 2 (Rho GDI 2) (Rho-GDI beta) (Ly-GDI)	1	0.915	2	1.892
329	spt|O95777|LSM8_HUMAN	U6 snRNA-associated Sm-like protein LSm8	3	1.164	3	1.038	-0.786	0.25
330	trm|Q6FHU3|Q6FHU3_HUMAN spt|Q06323|PSME1_HUMAN	PSME1 protein (Fragment) Proteasome activator complex subunit 1 (Proteasome activator 28-alpha subunit) (PA28alpha) (PA28a) (Activator of multicatalytic protease subunit 1) (11S regulator complex subunit alpha) (REG-alpha) (Interferon gamma up-regulated I-5111 protein) (IGUP I-5111)	6	0.807	3	2.103	4.228	0.002
331	trm|Q52NV4|Q52NV4_HUMAN	Histidyl-tRNA synthetase	3	0.932	3	1.258	1.442	0.15
332	spt|P49419|AL7A1_HUMAN	Aldehyde dehydrogenase family 7 member A1 (EC 1.2.1.3) (Antiquitin-1)	7	1.069	5	0.97	-0.568	1
333	trm|Q5VU59|Q5VU59_HUMAN trm|Q5HYB6|Q5HYB6_HUMAN	Tropomyosin 3 Hypothetical protein DKFZp686J1372	9	0.835	8	1.281	3.736	0.001
334	trm|Q53HM8|Q53HM8_HUMAN trm|Q5T0M6|Q5T0M6_HUMAN spt|P20073|ANXA7_HUMAN trm|Q5T0M7|Q5T0M7_HUMAN	Annexin VII isoform 1 variant (Fragment) Annexin A7 (ANXA7 protein) Annexin A7 (Annexin VII) (Synexin) Annexin A7	2	1.278	4	1.008
335	spt|P50395|GDIB_HUMAN	Rab GDP dissociation inhibitor beta (Rab GDI beta) (Guanosine diphosphate dissociation inhibitor 2) (GDI-2)	10	0.926	10	1.199	3.579	0.002
336	trm|Q6NXT5|Q6NXT5_HUMAN trm|Q9NPH2|Q9NPH2_HUMAN trm|Q9H2Y2|Q9H2Y2_HUMAN trm|Q9NSU0|Q9NSU0_HUMAN trm|Q7Z525|Q7Z525_HUMAN trm|Q9NVW7|Q9NVW7_HUMAN	Myo-inositol 1-phosphate synthase A1 "Myo-inositol 1-phosphate synthase A1 (EC 5.5.1.4) (CDNA FLJ11464 fis, clone HEMBA1001620, moderately similar to MYO-INOSITOL-1-PHOSPHATE SYNTHASE) " Inositol 1-phosphate synthase Hypothetical protein DKFZp434A0612 D-myo-inositol-3-phosphate synthase "CDNA FLJ10463 fis, clone NT2RP1001543, moderately similar to MYO- INOSITOL-1-PHOSPHATE SYNTHASE (EC 5.5.1.4) "	1	1.064	2	0.952
337	spt|Q13011|ECH1_HUMAN	Delta3,5-delta2,4-dienoyl-CoA isomerase, mitochondrial precursor (EC 5.3.3.-)	3	0.882	6	1.11	1.705	0.1
338	trm|Q5VVD0|Q5VVD0_HUMAN spt|P62913|RL11_HUMAN	Ribosomal protein L11 60S ribosomal protein L11 (CLL-associated antigen KW-12)	0		2	1.873
339	spt|Q99961|SH3G1_HUMAN trm|Q9UQD4|Q9UQD4_HUMAN	SH3-containing GRB2-like protein 1 (Endophilin-2) (Endophilin-A2) (SH3 domain protein 2B) (Extra eleven-nineteen leukemia fusion gene) (EEN) (EEN fusion partner of MLL) SH3-containing Grb-2-like 1 protein	1	0.662	2	0.607
340	trm|Q53H88|Q53H88_HUMAN spt|Q13561|DCTN2_HUMAN	Dynactin 2 variant (Fragment) Dynactin subunit 2 (Dynactin complex 50 kDa subunit) (50 kDa dynein- associated polypeptide) (p50 dynamitin) (DCTN-50)	4	0.931	8	1	0.775	0.25
341	spt|P25789|PSA4_HUMAN	Proteasome subunit alpha type 4 (EC 3.4.25.1) (Proteasome component C9) (Macropain subunit C9) (Multicatalytic endopeptidase complex subunit C9) (Proteasome subunit L)	4	0.983	5	1.142	1.362	0.15
342	trm|Q5JP67|Q5JP67_HUMAN trm|Q53F89|Q53F89_HUMAN spt|P00751|CFAB_HUMAN trm|Q5JP68|Q5JP68_HUMAN	B-factor, properdin Complement factor B preproprotein variant (Fragment) Complement factor B precursor (EC 3.4.21.47) (C3/C5 convertase) (Properdin factor B) (Glycine-rich beta glycoprotein) (GBG) (PBF2) [Contains: Complement factor B Ba fragment; Complement factor B Bb fragment] "B-factor, properdin "	6	0.872	6	0.733	-1.117	0.15
343	spt|Q9NR12|PDLI7_HUMAN	PDZ and LIM domain protein 7 (LIM mineralization protein) (LMP) (Protein enigma)	2	0.309	4	0.556
344	trm|Q9UKY7|Q9UKY7_HUMAN trm|Q96IP9|Q96IP9_HUMAN	Hypothetical protein CDV3 protein	4	0.981	5	0.91	-0.565	1
345	trm|Q86UY0|Q86UY0_HUMAN spt|Q8NBS9|TXND5_HUMAN trm|Q6EHZ3|Q6EHZ3_HUMAN trm|Q658S9|Q658S9_HUMAN	TXNDC5 protein Thioredoxin domain-containing protein 5 precursor (Thioredoxin-like protein p46) (Endoplasmic reticulum protein ERp46) Hypothetical protein STRF8 Hypothetical protein DKFZp666I134 (Fragment)	9	0.986	9	0.702	-2.283	0.025
346	spt|P14543|NID1_HUMAN	Nidogen-1 precursor (Entactin)	1	0.77	2	0.416
347	spt|P51649|SSDH_HUMAN	Succinate semialdehyde dehydrogenase, mitochondrial precursor (EC 1.2.1.24) (NAD(+)-dependent succinic semialdehyde dehydrogenase)	1	1.119	2	1.811
348	spt|P55084|ECHB_HUMAN	Trifunctional enzyme subunit beta, mitochondrial precursor (TP-beta) [Includes: 3-ketoacyl-CoA thiolase (EC 2.3.1.16) (Acetyl-CoA acyltransferase) (Beta-ketothiolase)]	4	1.205	5	1.249	0.126	1
349	spt|Q14697|GANAB_HUMAN	Neutral alpha-glucosidase AB precursor (EC 3.2.1.84) (Glucosidase II subunit alpha)	9	0.916	9	0.839	-1.262	0.15
350	trm|Q2LE71|Q2LE71_HUMAN spt|O15145|ARPC3_HUMAN	Actin related protein 2/3 complex Actin-related protein 2/3 complex subunit 3 (ARP2/3 complex 21 kDa subunit) (p21-ARC)	6	0.963	3	1.312	2.83	0.025
351	spt|P06703|S10A6_HUMAN	Protein S100-A6 (S100 calcium-binding protein A6) (Calcyclin) (Prolactin receptor-associated protein) (PRA) (Growth factor-inducible protein 2A9) (MLN 4)	8	0.927	7	1.558	3.065	0.005
352	trm|Q59FT2|Q59FT2_HUMAN	Microtubule-associated protein 4 isoform 1 variant (Fragment)	8	0.935	9	0.975	0.354	1
353	trm|Q5JP00|Q5JP00_HUMAN	Retinoblastoma binding protein 7	1	0.873	2	1.101
354	trm|Q1ZYL5|Q1ZYL5_HUMAN	Tropomyosin 1 alpha variant 6	1	0.655	3	1.508
355	spt|Q9NQW7|XPP1_HUMAN trm|Q5T6H7|Q5T6H7_HUMAN	Xaa-Pro aminopeptidase 1 (EC 3.4.11.9) (X-Pro aminopeptidase 1) (X- prolyl aminopeptidase 1, soluble) (Cytosolic aminopeptidase P) (Soluble aminopeptidase P) (sAmp) (Aminoacylproline aminopeptidase) "X-prolyl aminopeptidase (Aminopeptidase P) 1, soluble (SAMP, XPNPEP, XPNPEPL) "	0		0
356	trm|Q6MZV5|Q6MZV5_HUMAN spt|P48444|COPD_HUMAN	Hypothetical protein DKFZp686M09245 Coatomer subunit delta (Delta-coat protein) (Delta-COP) (Archain)	6	1.014	6	1.171	1.242	0.15
357	spt|Q14166|TTL12_HUMAN	Tubulin--tyrosine ligase-like protein 12	1	4.253	2	0.893
358	trm|Q5SVZ1|Q5SVZ1_HUMAN trm|Q5SVZ2|Q5SVZ2_HUMAN spt|P30085|KCY_HUMAN	UMP-CMP kinase (UMP-CMPK) UMP-CMP kinase (UMP-CMPK) UMP-CMP kinase (EC 2.7.4.14) (Cytidylate kinase) (Deoxycytidylate kinase) (Cytidine monophosphate kinase) (Uridine monophosphate/cytidine monophosphate kinase) (UMP/CMP kinase) (UMP/CMPK) (Uridine monophosphate kinase)	5	1.08	7	1.357	0.76	0.25
359	spt|P30084|ECHM_HUMAN	Enoyl-CoA hydratase, mitochondrial precursor (EC 4.2.1.17) (Short chain enoyl-CoA hydratase) (SCEH) (Enoyl-CoA hydratase 1)	4	1.108	6	0.807	-0.698	1
360	trm|Q59GN9|Q59GN9_HUMAN spt|O00429|DNM1L_HUMAN trm|Q32Q67|Q32Q67_HUMAN	Dynamin-like protein DYNIV-11 variant (Fragment) Dynamin-1-like protein (EC 3.6.5.5) (Dynamin-like protein) (Dnm1p/Vps1p-like protein) (DVLP) (Dynamin family member proline-rich carboxyl-terminal domain less) (Dymple) (Dynamin-related protein 1) (Dynamin-like protein 4) (Dynamin-like protein IV) (HdynIV) DNM1L protein (Fragment)	1	0.946	2	0.996
361	trm|Q9Y2J6|Q9Y2J6_HUMAN	KIAA0992 protein (Fragment)	1	1.105	2	0.665
362	spt|P49448|DHE4_HUMAN	Glutamate dehydrogenase 2, mitochondrial precursor (EC 1.4.1.3) (GDH)	0		0
363	trm|Q6LES2|Q6LES2_HUMAN spt|P09525|ANXA4_HUMAN	ANXA4 protein (Hypothetical protein ANXA4) (Proliferation-inducing protein 28) (Fragment) Annexin A4 (Annexin IV) (Lipocortin IV) (Endonexin I) (Chromobindin-4) (Protein II) (P32.5) (Placental anticoagulant protein II) (PAP-II) (PP4-X) (35-beta calcimedin) (Carbohydrate-binding protein P33/P41) (P33/41)	4	1.227	5	1.009	-1.237	0.15
364	trm|Q6NWP7|Q6NWP7_HUMAN trm|Q6DRA9|Q6DRA9_HUMAN trm|Q6FGB8|Q6FGB8_HUMAN spt|P62805|H4_HUMAN trm|Q0VAS5|Q0VAS5_HUMAN	HIST1H4I protein "Histone H4/o (HIST1H4A protein) (HIST1H4I protein) (Histone 1, H4f) (Novel protein similar to histone 2, H4) (HIST2H4) (Histone 2, H4) " Histone H4 (Fragment) Histone H4 HIST1H4A protein	5	0.961	4	1.856	2.284	0.05
365	trm|Q6GMW4|Q6GMW4_HUMAN	IGLC2 protein	6	1.119	6	0.839	-1.25	0.15
366	spt|Q00796|DHSO_HUMAN	Sorbitol dehydrogenase (EC 1.1.1.14) (L-iditol 2-dehydrogenase)	6	1.391	9	1.545	0.348	1
367	trm|Q567Q7|Q567Q7_HUMAN spt|P62917|RL8_HUMAN	Ribosomal protein L8 60S ribosomal protein L8	3	1.059	3	2.901	6.199	0.002
368	spt|P62829|RL23_HUMAN trm|Q9BTQ7|Q9BTQ7_HUMAN	60S ribosomal protein L23 (Ribosomal protein L17) Similar to ribosomal protein L23 (Fragment)	4	1.016	2	1.139
369	spt|P23142|FBLN1_HUMAN	Fibulin-1 precursor	7	0.972	5	0.466	-2.822	0.01
370	spt|P01621|KV3C_HUMAN	Ig kappa chain V-III region NG9 precursor (Fragment)	4	1.086	6	0.988	-0.361	1
371	spt|Q9NZN4|EHD2_HUMAN trm|Q8NCJ3|Q8NCJ3_HUMAN	EH-domain-containing protein 2 "CDNA FLJ90220 fis, clone MAMMA1003126, moderately similar to Human Hpast (HPAST) mRNA "	7	0.957	5	0.903	-0.313	1
372	trm|Q8NFQ0|Q8NFQ0_HUMAN spt|P50851|LRBA_HUMAN trm|Q59HC1|Q59HC1_HUMAN	Beige-like protein Lipopolysaccharide-responsive and beige-like anchor protein (CDC4-like protein) (Beige-like protein) Beige-like protein variant (Fragment)	0		1	2.908
373	spt|O95487|SC24B_HUMAN trm|Q0VG08|Q0VG08_HUMAN	Protein transport protein Sec24B (SEC24-related protein B) "SEC24 related gene family, member B (S. cerevisiae) "	1	0.783	2	0.821
374	spt|Q9UMS4|PRP19_HUMAN	Pre-mRNA-splicing factor 19 (PRP19/PSO4 homolog) (Nuclear matrix protein 200) (hPso4)	1	0.987	2	2.063
375	spt|Q53FA7|QORX_HUMAN	Putative quinone oxidoreductase (EC 1.-.-.-) (Tumor protein p53- inducible protein 3) (p53-induced protein 3)	4	0.986	8	0.929	-0.243	1
376	spt|P62244|RS15A_HUMAN	40S ribosomal protein S15a	1	0.813	2	3.469
377	spt|P43243|MATR3_HUMAN trm|Q68D11|Q68D11_HUMAN	Matrin-3 Hypothetical protein DKFZp686K23100	2	1.319	1	1.939
378	spt|O14556|G3PT_HUMAN	Glyceraldehyde-3-phosphate dehydrogenase, testis-specific (EC 1.2.1.12) (Spermatogenic cell-specific glyceraldehyde 3-phosphate dehydrogenase 2) (GAPDH-2)	4	0.934	5	1.251	1.528	0.1
379	trm|Q53HV1|Q53HV1_HUMAN trm|Q96IR1|Q96IR1_HUMAN trm|Q6IPY4|Q6IPY4_HUMAN spt|P62701|RS4X_HUMAN	Ribosomal protein S4, X-linked X isoform variant (Fragment) RPS4X protein (Fragment) "Ribosomal protein S4, X-linked (RPS4X protein) " "40S ribosomal protein S4, X isoform (Single copy abundant mRNA protein) (SCR10) "	3	0.747	3	1.691	5.216	0.005
380	trm|Q53HS0|Q53HS0_HUMAN spt|P47897|SYQ_HUMAN	Glutaminyl-tRNA synthetase variant (Fragment) Glutaminyl-tRNA synthetase (EC 6.1.1.18) (Glutamine--tRNA ligase) (GlnRS)	1	1.155	2	1.34
381	spt|P02760|AMBP_HUMAN	AMBP protein precursor [Contains: Alpha-1-microglobulin (Protein HC) (Complex-forming glycoprotein heterogeneous in charge) (Alpha-1 microglycoprotein); Inter-alpha-trypsin inhibitor light chain (ITI-LC) (Bikunin) (HI-30)]	3	1.014	3	0.603	-2.376	0.05
382	spt|P62899|RL31_HUMAN	60S ribosomal protein L31	2	0.869	4	1.438
383	spt|P61960|UFM1_HUMAN trm|Q5VXS2|Q5VXS2_HUMAN trm|Q5VXS4|Q5VXS4_HUMAN	Ubiquitin-fold modifier 1 precursor Chromosome 13 open reading frame 20 (Fragment) Chromosome 13 open reading frame 20	1	1.075	2	0.982
384	trm|Q5BKZ9|Q5BKZ9_HUMAN	PGM1 protein (Fragment)	5	0.947	1	0.799
385	trm|Q53F64|Q53F64_HUMAN	Heterogeneous nuclear ribonucleoprotein AB isoform a variant (Fragment)	5	0.907	7	1.228	2.115	0.05
386	spt|Q9Y5Z4|HEBP2_HUMAN	Heme-binding protein 2 (Protein SOUL) (Placental protein 23) (PP23)	3	0.792	0
387	trm|Q12771|Q12771_HUMAN	P37 AUF1	6	0.887	3	1.381	4.889	0.001
388	spt|O14745|NHERF_HUMAN	Ezrin-radixin-moesin-binding phosphoprotein 50 (EBP50) (Na(+)/H(+) exchange regulatory cofactor NHE-RF) (NHERF-1) (Regulatory cofactor of Na(+)/H(+) exchanger) (Sodium-hydrogen exchanger regulatory factor 1) (Solute carrier family 9 isoform 3 regulatory factor 1)	2	0.985	3	1.255
389	spt|Q15124|PGM5_HUMAN	Phosphoglucomutase-like protein 5 (Phosphoglucomutase-related protein) (PGM-RP) (Aciculin)	4	1.002	2	0.864
390	spt|Q6P2Q9|PRP8_HUMAN	Pre-mRNA-processing-splicing factor 8 (Splicing factor Prp8) (PRP8 homolog) (220 kDa U5 snRNP-specific protein) (p220)	0		2	2.482
391	spt|Q14764|MVP_HUMAN	Major vault protein (MVP) (Lung resistance-related protein)	1	1.573	2	1.927
392	spt|Q16186|ADRM1_HUMAN trm|Q96FJ7|Q96FJ7_HUMAN	Adhesion-regulating molecule 1 precursor (110 kDa cell membrane glycoprotein) (Gp110) Hypothetical protein (Fragment)	1	1.348	2	1.025
393	trm|Q7Z612|Q7Z612_HUMAN trm|Q6ICQ4|Q6ICQ4_HUMAN trm|Q6FG99|Q6FG99_HUMAN spt|P05386|RLA1_HUMAN	Acidic ribosomal phosphoprotein P1 RPLP1 protein (Fragment) RPLP1 protein 60S acidic ribosomal protein P1	6	0.995	4	1.335	1.654	0.1
394	spt|O14737|PDCD5_HUMAN	Programmed cell death protein 5 (Protein TFAR19) (TF-1 cell apoptosis- related gene 19 protein)	4	0.906	5	0.854	-0.407	1
395	spt|Q99829|CPNE1_HUMAN trm|Q5JX46|Q5JX46_HUMAN	Copine-1 (Copine I) Copine I (Fragment)	8	0.963	7	0.761	-2.294	0.025
396	spt|P07858|CATB_HUMAN	Cathepsin B precursor (EC 3.4.22.1) (Cathepsin B1) (APP secretase) (APPS) [Contains: Cathepsin B light chain; Cathepsin B heavy chain]	9	1.046	9	1.61	3.395	0.002
397	trm|Q32Q10|Q32Q10_HUMAN	RSU1 protein (Fragment)	3	1.274	2	2.352
398	spt|Q15436|SC23A_HUMAN	Protein transport protein Sec23A (SEC23-related protein A)	3	1.222	4	0.721	-1.83	0.1
399	spt|Q04760|LGUL_HUMAN trm|Q59EL0|Q59EL0_HUMAN	Lactoylglutathione lyase (EC 4.4.1.5) (Methylglyoxalase) (Aldoketomutase) (Glyoxalase I) (Glx I) (Ketone-aldehyde mutase) (S-D- lactoylglutathione methylglyoxal lyase) Glyoxalase I variant (Fragment)	7	0.851	5	0.845	-0.069	1
400	trm|Q53GX7|Q53GX7_HUMAN spt|P26639|SYTC_HUMAN	Threonyl-tRNA synthetase variant (Fragment) "Threonyl-tRNA synthetase, cytoplasmic (EC 6.1.1.3) (Threonine--tRNA ligase) (ThrRS) "	2	0.743	4	1.004
401	trm|Q9BQ80|Q9BQ80_HUMAN trm|Q96FD7|Q96FD7_HUMAN spt|P13489|RINI_HUMAN	Ribonuclease/angiogenin inhibitor 1 RNH1 protein (Fragment) Ribonuclease inhibitor (Ribonuclease/angiogenin inhibitor 1) (RAI) (Placental ribonuclease inhibitor) (RNase inhibitor) (RI)	8	0.964	7	1.016	0.405	1
402	spt|P30048|PRDX3_HUMAN trm|Q53HC2|Q53HC2_HUMAN	Thioredoxin-dependent peroxide reductase, mitochondrial precursor (EC 1.11.1.15) (Peroxiredoxin-3) (PRX III) (Antioxidant protein 1) (AOP-1) (Protein MER5 homolog) (HBC189) Peroxiredoxin 3 isoform a variant (Fragment)	7	1.097	5	1.263	1.925	0.05
403	trm|Q5VU22|Q5VU22_HUMAN spt|Q8NC51|PAIRB_HUMAN trm|Q5VU21|Q5VU21_HUMAN trm|Q5VU20|Q5VU20_HUMAN trm|Q63HR1|Q63HR1_HUMAN	PAI-1 mRNA-binding protein (PAI-RBP1) Plasminogen activator inhibitor 1 RNA-binding protein (PAI1 RNA- binding protein 1) (PAI-RBP1) (SERPINE1 mRNA-binding protein 1) PAI-1 mRNA-binding protein variant (PAI-RBP1) PAI-1 mRNA-binding protein (PAI-RBP1) Hypothetical protein DKFZp686P17171	3	1.022	3	1.096	1.378	0.15
404	trm|Q59HD5|Q59HD5_HUMAN trm|Q6FHN9|Q6FHN9_HUMAN trm|Q2VEU1|Q2VEU1_HUMAN spt|P25325|THTM_HUMAN	3-mercaptopyruvate sulfurtransferase variant (Fragment) MPST protein (Fragment) Mercaptopyruvate sulfurtransferase variant (Fragment) 3-mercaptopyruvate sulfurtransferase (EC 2.8.1.2) (MST)	8	1.161	7	0.867	-1.355	0.1
405	trm|Q6GTG1|Q6GTG1_HUMAN trm|Q53F31|Q53F31_HUMAN spt|P02774|VTDB_HUMAN	Group-specific component (Vitamin D binding protein) Vitamin D-binding protein variant (Fragment) Vitamin D-binding protein precursor (DBP) (Group-specific component) (Gc-globulin) (VDB)	8	1.021	7	0.577	-4.42	0
406	trm|Q8NAB7|Q8NAB7_HUMAN trm|Q53HU6|Q53HU6_HUMAN trm|Q53FI4|Q53FI4_HUMAN spt|P21810|PGS1_HUMAN	CDNA FLJ35635 fis, clone SPLEN2011805, highly similar to BONE/CARTILAGE PROTEOGLYCAN I Biglycan preproprotein variant (Fragment) Biglycan preproprotein variant (Fragment) Biglycan precursor (Bone/cartilage proteoglycan I) (PG-S1)	6	0.98	3	0.953	-0.102	1
407	spt|P21399|IREB1_HUMAN trm|Q9HBB2|Q9HBB2_HUMAN	Iron-responsive element-binding protein 1 (IRE-BP 1) (Iron regulatory protein 1) (IRP1) (Ferritin repressor protein) (Aconitate hydratase) (EC 4.2.1.3) (Citrate hydro-lyase) (Aconitase) Iron regulatory protein 1	3	1.027	0
408	trm|Q6IA84|Q6IA84_HUMAN trm|Q53HD5|Q53HD5_HUMAN spt|Q9UJ70|NAGK_HUMAN	NAGK protein (Hypothetical protein tmp_locus_2) N-Acetylglucosamine kinase variant (Fragment) N-acetylglucosamine kinase (EC 2.7.1.59) (GlcNAc kinase)	0		2	0.729
409	trm|Q7Z7P3|Q7Z7P3_HUMAN spt|P00734|THRB_HUMAN trm|Q4QZ40|Q4QZ40_HUMAN trm|Q53H04|Q53H04_HUMAN trm|Q53H06|Q53H06_HUMAN	Coagulation factor II (Thrombin) Prothrombin precursor (EC 3.4.21.5) (Coagulation factor II) [Contains: Activation peptide fragment 1; Activation peptide fragment 2; Thrombin light chain; Thrombin heavy chain] Prothrombin Coagulation factor II variant (Fragment) Coagulation factor II variant (Fragment)	7	0.925	5	0.757	-1.462	0.1
410	spt|P10768|ESTD_HUMAN	S-formylglutathione hydrolase (EC 3.1.2.12) (FGH) (Esterase D)	4	1.177	2	0.919
411	spt|Q9UBT2|ULE1B_HUMAN	Ubiquitin-like 1-activating enzyme E1B (SUMO-1-activating enzyme subunit 2) (Anthracycline-associated resistance ARX)	3	0.923	6	0.887	-0.449	1
412	spt|Q14498|RNPC2_HUMAN trm|Q5QP20|Q5QP20_HUMAN trm|Q7Z3L0|Q7Z3L0_HUMAN trm|Q68DD9|Q68DD9_HUMAN trm|Q6N037|Q6N037_HUMAN	RNA-binding region-containing protein 2 (Hepatocellular carcinoma protein 1) (Splicing factor HCC1) "RNA-binding region (RNP1, RRM) containing 2 (Fragment) " Hypothetical protein DKFZp781I1140 Hypothetical protein DKFZp781C0423 (Fragment) Hypothetical protein DKFZp686A11192	0		2	1.926
413	spt|P43490|NAMPT_HUMAN	Nicotinamide phosphoribosyltransferase (EC 2.4.2.12) (NAmPRTase) (Nampt) (Pre-B cell-enhancing factor) (Pre-B-cell colony-enhancing factor 1) (Visfatin)	1	0.801	2	1.19
414	trm|Q7Z4Y4|Q7Z4Y4_HUMAN trm|Q7Z531|Q7Z531_HUMAN spt|Q9UIJ7|KAD3_HUMAN trm|Q9HC01|Q9HC01_HUMAN	GTP:AMP phosphotransferase GTP:ATP phosphotransferase GTP:AMP phosphotransferase mitochondrial (EC 2.7.4.10) (Adenylate kinase 3) (AK3) (Adenylate kinase 3 alpha-like 1) GTP:AMP phosphotransferase (Adenylate kinase 3 like 1)	2	1.134	2	0.999
415	trm|Q0JT29|Q0JT29_HUMAN spt|O43852|CALU_HUMAN	Hypothetical protein CALU Calumenin precursor (Crocalbin) (IEF SSP 9302)	6	0.93	3	0.454	-4.724	0.002
416	trm|Q53XZ1|Q53XZ1_HUMAN spt|P09496|CLCA_HUMAN	Clathrin, light polypeptide (Lca) Clathrin light chain A (Lca)	1	0.901	2	0.98
417	spt|P05187|PPB1_HUMAN	Alkaline phosphatase, placental type precursor (EC 3.1.3.1) (PLAP-1) (Regan isozyme)	1	0.674	2	1.079
418	trm|Q32Q12|Q32Q12_HUMAN spt|P22392|NDKB_HUMAN trm|Q1WM23|Q1WM23_HUMAN	NME1-NME2 protein Nucleoside diphosphate kinase B (EC 2.7.4.6) (NDK B) (NDP kinase B) (nm23-H2) (C-myc purine-binding transcription factor PUF) NM23-LV	10	0.969	10	1.098	1.45	0.1
419	trm|Q96CV8|Q96CV8_HUMAN trm|Q9BW75|Q9BW75_HUMAN spt|P52888|MEPD_HUMAN	Thimet oligopeptidase 1 THOP1 protein (Fragment) Thimet oligopeptidase (EC 3.4.24.15) (Endopeptidase 24.15) (MP78)	0		2	1.076
420	spt|P01593|KV1A_HUMAN spt|P01613|KV1U_HUMAN	Ig kappa chain V-I region AG Ig kappa chain V-I region Ni	1	1.529	2	1.046
421	trm|Q5TGE0|Q5TGE0_HUMAN	Ubiquitin-conjugating enzyme E2 variant 1	1	1.112	2	0.698
422	trm|Q53H03|Q53H03_HUMAN trm|Q53GW5|Q53GW5_HUMAN trm|O95138|O95138_HUMAN spt|P49321|NASP_HUMAN trm|Q5T622|Q5T622_HUMAN trm|Q5T626|Q5T626_HUMAN	Nuclear autoantigenic sperm protein isoform 2 variant (Fragment) Nuclear autoantigenic sperm protein isoform 2 variant (Fragment) Nuclear autoantigenic sperm protein autosomal variant (Fragment) Nuclear autoantigenic sperm protein (NASP) Nuclear autoantigenic sperm protein (Histone-binding) (Fragment) Nuclear autoantigenic sperm protein (Histone-binding)	6	0.876	6	0.943	0.558	1
423	spt|P50552|VASP_HUMAN	Vasodilator-stimulated phosphoprotein (VASP)	1	0.773	3	1.146
424	trm|Q53HK9|Q53HK9_HUMAN	Ribosomal protein P0 variant (Fragment)	2	1.413	3	2.322
425	trm|Q9NQR4|Q9NQR4_HUMAN trm|Q8WUF0|Q8WUF0_HUMAN	Nit protein 2 (Nitrilase family, member 2) (CUA002) "Nitrilase family, member 2 "	1	1.555	2	1.152
426	trm|Q1HDT5|Q1HDT5_HUMAN	Hemoglobin alpha 1-2 hybrid	3	0.929	6	0.462	-2.083	0.05
427	spt|P78417|GSTO1_HUMAN	Glutathione transferase omega-1 (EC 2.5.1.18) (GSTO 1-1)	8	0.979	7	1.282	2.045	0.05
428	spt|O75533|SF3B1_HUMAN	Splicing factor 3B subunit 1 (Spliceosome-associated protein 155) (SAP 155) (SF3b155) (Pre-mRNA-splicing factor SF3b 155 kDa subunit)	1	0.713	2	0.911
429	spt|P48643|TCPE_HUMAN trm|Q9BU08|Q9BU08_HUMAN	T-complex protein 1 subunit epsilon (TCP-1-epsilon) (CCT-epsilon) Hypothetical protein (Fragment)	8	0.838	7	0.965	1.058	0.2
430	trm|Q7KZ24|Q7KZ24_HUMAN	Nuclease sensitive element binding protein-1	2	0.897	4	1.036
431	trm|Q9NY85|Q9NY85_HUMAN trm|Q9BT63|Q9BT63_HUMAN trm|Q49AJ9|Q49AJ9_HUMAN trm|Q96QL0|Q96QL0_HUMAN trm|Q5I0G0|Q5I0G0_HUMAN trm|Q8TBW1|Q8TBW1_HUMAN spt|P39023|RL3_HUMAN	Ribosomal protein L3 (Fragment) RPL3 protein (Fragment) RPL3 protein Ribosomal protein L3 Ribosomal protein L3 Hypothetical protein (Fragment) 60S ribosomal protein L3 (HIV-1 TAR RNA-binding protein B) (TARBP-B)	1	1.057	2	1.019
432	spt|Q9BQ04|RBM4B_HUMAN	RNA-binding protein 4B (RNA-binding motif protein 4B) (RNA-binding protein 30) (RNA-binding motif protein 30)	1	1.855	2	1.579
433	trm|Q59GY2|Q59GY2_HUMAN trm|Q53G74|Q53G74_HUMAN spt|P36578|RL4_HUMAN	Ribosomal protein L4 variant (Fragment) Ribosomal protein L4 variant (Fragment) 60S ribosomal protein L4 (L1)	4	1.311	2	2.604
434	trm|Q53GU1|Q53GU1_HUMAN spt|Q9UGI8|TES_HUMAN	Testin isoform 1 variant (Fragment) Testin (TESS)	2	0.804	6	1.074
435	spt|Q15056|IF4H_HUMAN	Eukaryotic translation initiation factor 4H (eIF-4H) (Williams-Beuren syndrome chromosome region 1 protein)	3	0.779	3	1.162	1.832	0.1
436	spt|Q9H4A4|AMPB_HUMAN trm|Q7RU04|Q7RU04_HUMAN	Aminopeptidase B (EC 3.4.11.6) (Ap-B) (Arginyl aminopeptidase) (Arginine aminopeptidase) Aminopeptidase B (EC 3.4.11.6)	3	1	4	0.84	-1.652	0.1
437	trm|Q6NR85|Q6NR85_HUMAN spt|P00441|SODC_HUMAN	Superoxide dismutase [Cu-Zn] Superoxide dismutase [Cu-Zn] (EC 1.15.1.1)	10	1.046	10	1.02	-0.2	1
438	trm|Q8WVC2|Q8WVC2_HUMAN spt|P63220|RS21_HUMAN	RPS21 protein 40S ribosomal protein S21	2	1.332	4	1.593
439	spt|P26640|SYV_HUMAN	Valyl-tRNA synthetase (EC 6.1.1.9) (Valine--tRNA ligase) (ValRS) (Protein G7a)	9	0.953	8	0.733	-1.559	0.1
440	trm|Q5T986|Q5T986_HUMAN spt|P19823|ITIH2_HUMAN trm|Q5T985|Q5T985_HUMAN	Inter-alpha (Globulin) inhibitor, H2 polypeptide Inter-alpha-trypsin inhibitor heavy chain H2 precursor (ITI heavy chain H2) (Inter-alpha-inhibitor heavy chain 2) (Inter-alpha-trypsin inhibitor complex component II) (Serum-derived hyaluronan-associated protein) (SHAP) "Inter-alpha (Globulin) inhibitor, H2 polypeptide "	6	0.923	6	0.558	-2.691	0.025
441	spt|P24534|EF1B_HUMAN	Elongation factor 1-beta (EF-1-beta)	8	1.011	6	1.376	3.816	0.002
442	trm|Q6FHM6|Q6FHM6_HUMAN spt|P55769|NHPX_HUMAN	NHP2L1 protein (NHP2 non-histone chromosome protein 2-like 1) (S. cerevisiae) NHP2-like protein 1 (High mobility group-like nuclear protein 2 homolog 1) (U4/U6.U5 tri-snRNP 15.5 kDa protein) (OTK27) (hSNU13)	4	0.968	2	0.412
443	spt|P50570|DYN2_HUMAN	Dynamin-2 (EC 3.6.5.5)	1	1.142	2	0.943
444	spt|Q9UMX5|NENF_HUMAN	Neudesin precursor (Neuron-derived neurotrophic factor) (Secreted protein of unknown function) (SPUF protein)	1	1.16	2	0.777
445	spt|O94788|AL1A2_HUMAN	Retinal dehydrogenase 2 (EC 1.2.1.36) (RalDH2) (RALDH 2) (RALDH(II)) (Retinaldehyde-specific dehydrogenase type 2) (Aldehyde dehydrogenase family 1 member A2)	7	0.906	5	0.405	-5.327	0
446	spt|Q9NR45|SIAS_HUMAN	Sialic acid synthase (N-acetylneuraminate synthase) (EC 2.5.1.56) (N- acetylneuraminic acid synthase) (N-acetylneuraminate-9-phosphate synthase) (EC 2.5.1.57) (N-acetylneuraminic acid phosphate synthase)	1	1.537	4	1.011
447	trm|Q15367|Q15367_HUMAN	Ribonucleoprotein (La) (Fragment)	6	0.792	3	1.289	2.439	0.025
448	trm|Q6NUK9|Q6NUK9_HUMAN spt|Q12792|TWF1_HUMAN	PTK9 protein (Fragment) Twinfilin-1 (Protein A6) (Protein tyrosine kinase 9)	1	1.076	3	1.41
449	trm|Q9BV64|Q9BV64_HUMAN trm|Q6MZS5|Q6MZS5_HUMAN trm|Q0VGD6|Q0VGD6_HUMAN spt|O43390|HNRPR_HUMAN	HNRPR protein (Heterogeneous nuclear ribonucleoprotein R) Hypothetical protein DKFZp686A13234 (Fragment) HNRPR protein (Fragment) Heterogeneous nuclear ribonucleoprotein R (hnRNP R)	5	1.019	7	1.247	1.091	0.2
450	spt|Q02952|AKA12_HUMAN	A-kinase anchor protein 12 (A-kinase anchor protein 250 kDa) (AKAP 250) (Myasthenia gravis autoantigen gravin)	2	0.75	4	0.812
451	spt|P04433|KV3I_HUMAN	Ig kappa chain V-III region VG precursor (Fragment)	4	1.027	8	0.483	-2.762	0.025
452	trm|Q59EU8|Q59EU8_HUMAN spt|P54725|RD23A_HUMAN trm|Q5M7Z1|Q5M7Z1_HUMAN	UV excision repair protein RAD23 homolog A variant (Fragment) UV excision repair protein RAD23 homolog A (hHR23A) RAD23 homolog A (S. cerevisiae)	0		1	8.602
453	spt|O75390|CISY_HUMAN	Citrate synthase, mitochondrial precursor (EC 2.3.3.1)	6	1.037	6	0.888	-1.69	0.1
454	trm|Q5QPQ6|Q5QPQ6_HUMAN spt|P35914|HMGCL_HUMAN trm|Q5QPQ5|Q5QPQ5_HUMAN	3-hydroxymethyl-3-methylglutaryl-Coenzyme A lyase (Hydroxymethylglutaricaciduria) "Hydroxymethylglutaryl-CoA lyase, mitochondrial precursor (EC 4.1.3.4) (HMG-CoA lyase) (HL) (3-hydroxy-3-methylglutarate-CoA lyase) " 3-hydroxymethyl-3-methylglutaryl-Coenzyme A lyase (Hydroxymethylglutaricaciduria)	0		0
455	spt|P08133|ANXA6_HUMAN	Annexin A6 (Annexin VI) (Lipocortin VI) (P68) (P70) (Protein III) (Chromobindin-20) (67 kDa calelectrin) (Calphobindin-II) (CPB-II)	5	0.695	3	0.946	1.307	0.15
456	spt|P28065|PSB9_HUMAN	Proteasome subunit beta type 9 precursor (EC 3.4.25.1) (Proteasome chain 7) (Macropain chain 7) (Multicatalytic endopeptidase complex chain 7) (RING12 protein) (Low molecular mass protein 2)	1	0.955	2	1.745
457	trm|Q5T5C8|Q5T5C8_HUMAN trm|Q53HA4|Q53HA4_HUMAN spt|P49591|SYS_HUMAN trm|Q5T5C7|Q5T5C7_HUMAN trm|Q0VGA5|Q0VGA5_HUMAN	Seryl-tRNA synthetase Seryl-tRNA synthetase variant (Fragment) Seryl-tRNA synthetase (EC 6.1.1.11) (Serine--tRNA ligase) (SerRS) Seryl-tRNA synthetase SARS protein	4	1.074	2	0.828
458	spt|P30040|ERP29_HUMAN	Endoplasmic reticulum protein ERp29 precursor (ERp31) (ERp28)	6	0.954	10	0.925	-0.181	1
459	spt|Q9HBL0|TENS1_HUMAN trm|Q4ZG71|Q4ZG71_HUMAN	Tensin-1 Hypothetical protein TNS	1	0.58	2	0.816
460	trm|Q95HN7|Q95HN7_HUMAN trm|Q29911|Q29911_HUMAN trm|Q29766|Q29766_HUMAN trm|Q95364|Q95364_HUMAN trm|Q29981|Q29981_HUMAN trm|Q29985|Q29985_HUMAN trm|Q08173|Q08173_HUMAN trm|Q29662|Q29662_HUMAN trm|O19691|O19691_HUMAN trm|Q29938|Q29938_HUMAN trm|Q95353|Q95353_HUMAN trm|O97996|O97996_HUMAN trm|Q29932|Q29932_HUMAN trm|Q29748|Q29748_HUMAN trm|Q29694|Q29694_HUMAN trm|O19771|O19771_HUMAN trm|O19773|O197…	HLA class 1 antigen Transmembrane glycoprotein precursor (HLA-B*1513) MHC type I antigen (Fragment) MHC HLA-B*51 protein (Fragment) MHC HLA-B cell surface glycoprotein precursor MHC HLA-B cell surface glycoprotein precursor MHC HLA B71 (Fragment) MHC class I protein HLA-B heavy chain (Fragment) MHC class I lymphocyte antigen precursor (Fragment) MHC class I lymphocyte antigen precursor MHC class …	0		0
461	trm|Q6FGX8|Q6FGX8_HUMAN spt|P09455|RET1_HUMAN	RBP1 protein "Retinol-binding protein I, cellular (Cellular retinol-binding protein) (CRBP) "	6	0.984	3	0.979	-0.024	1
462	spt|Q9HC84|MUC5B_HUMAN	Mucin-5B precursor (Mucin-5 subtype B, tracheobronchial) (High molecular weight salivary mucin MG1) (Sublingual gland mucin)	3	0.888	8	1.053	0.833	0.25
463	trm|Q5VVW7|Q5VVW7_HUMAN spt|Q96TA1|NIBL_HUMAN trm|Q4LE55|Q4LE55_HUMAN	OTTHUMP00000022188 (OC58) Niban-like protein (Meg-3) C9orf88 variant protein (Fragment)	0		0
464	trm|Q9BUH6|Q9BUH6_HUMAN	Chromosome 9 open reading frame 142 (OTTHUMP00000022672)	1	0.67	2	1.229
465	trm|Q1ZYW2|Q1ZYW2_HUMAN spt|Q6FHJ7|SFRP4_HUMAN	Secreted frizzled-related protein 4 "Secreted frizzled-related protein 4 precursor (sFRP-4) (Frizzled protein, human endometrium) (FrpHE) "	6	0.724	3	0.432	-3.071	0.01
466	spt|Q9NVA2|SEP11_HUMAN	Septin-11	1	0.927	4	0.657
467	spt|Q15257|PTPA_HUMAN	Serine/threonine-protein phosphatase 2A regulatory subunit B' (PP2A, subunit B', PR53 isoform) (Phosphotyrosyl phosphatase activator) (PTPA)	5	0.792	3	1.979	3.256	0.01
468	spt|P23368|MAOM_HUMAN trm|Q9BWL6|Q9BWL6_HUMAN	NAD-dependent malic enzyme, mitochondrial precursor (EC 1.1.1.38) (NAD-ME) (Malic enzyme 2) ME2 protein	1	1.02	2	0.978
469	spt|P61970|NTF2_HUMAN	Nuclear transport factor 2 (NTF-2) (Placental protein 15) (PP15)	6	1.082	3	0.975	-0.805	0.25
470	spt|P17844|DDX5_HUMAN	Probable ATP-dependent RNA helicase DDX5 (EC 3.6.1.-) (DEAD box protein 5) (RNA helicase p68)	2	1.038	4	1.543
471	trm|Q59FD4|Q59FD4_HUMAN spt|P19367|HXK1_HUMAN	Hexokinase 1 isoform HKI variant (Fragment) Hexokinase-1 (EC 2.7.1.1) (Hexokinase type I) (HK I) (Brain form hexokinase)	6	1.119	3	1.199	1.043	0.2
472	spt|P50454|SERPH_HUMAN trm|Q6ZMS8|Q6ZMS8_HUMAN	Serpin H1 precursor (Collagen-binding protein) (Colligin) (47 kDa heat shock protein) (Rheumatoid arthritis-related antigen RA-A47) (Arsenic- transactivated protein 3) (AsTP3) (Proliferation-inducing gene 14 protein) "CDNA FLJ16712 fis, clone UTERU2032279, highly similar to 47 kDa HEAT SHOCK PROTEIN "	9	0.958	9	0.34	-3.127	0.005
473	trm|Q5U0I1|Q5U0I1_HUMAN spt|Q15907|RB11B_HUMAN trm|Q2YDT2|Q2YDT2_HUMAN trm|Q6FHR0|Q6FHR0_HUMAN trm|Q6FI42|Q6FI42_HUMAN	RAB11B, member RAS oncogene family Ras-related protein Rab-11B (GTP-binding protein YPT3) "RAB11B, member RAS oncogene family " RAB11B protein (Fragment) RAB11B protein	3	1.106	7	1.378	0.545	1
474	trm|Q6FHF5|Q6FHF5_HUMAN spt|P12004|PCNA_HUMAN	Proliferating cell nuclear antigen (PCNA) (Fragment) Proliferating cell nuclear antigen (PCNA) (Cyclin)	1	1.042	2	0.829
475	trm|Q5VYJ4|Q5VYJ4_HUMAN spt|P62304|RUXE_HUMAN	Small nuclear ribonucleoprotein polypeptide E-like 1 Small nuclear ribonucleoprotein E (snRNP-E) (Sm protein E) (Sm-E) (SmE)	6	1.047	5	1.356	2.47	0.025
476	trm|Q3SYL3|Q3SYL3_HUMAN spt|P09972|ALDOC_HUMAN trm|Q6P0L5|Q6P0L5_HUMAN trm|Q6FH94|Q6FH94_HUMAN	ALDOC protein (Fragment) Fructose-bisphosphate aldolase C (EC 4.1.2.13) (Brain-type aldolase) ALDOC protein (Fragment) "ALDOC protein (Aldolase C, fructose-bisphosphate) "	6	0.947	8	1.02	0.348	1
477	trm|Q3KQU0|Q3KQU0_HUMAN spt|P18124|RL7_HUMAN	RPL7 protein 60S ribosomal protein L7	1	0.804	2	2.026
478	trm|Q0VAX8|Q0VAX8_HUMAN spt|Q14008|CKAP5_HUMAN trm|Q0VAX7|Q0VAX7_HUMAN	Cytoskeleton associated protein 5 Cytoskeleton-associated protein 5 (Colonic and hepatic tumor over- expressed protein) (Ch-TOG protein) CKAP5 protein	0		0
479	spt|P16104|H2AX_HUMAN	Histone H2A.x (H2a/x)	7	1.319	5	1.572	1.608	0.1
480	spt|P07954|FUMH_HUMAN	Fumarate hydratase, mitochondrial precursor (EC 4.2.1.2) (Fumarase)	4	0.835	2	0.524
481	spt|P02765|FETUA_HUMAN	Alpha-2-HS-glycoprotein precursor (Fetuin-A) (Alpha-2-Z-globulin) (Ba- alpha-2-glycoprotein) [Contains: Alpha-2-HS-glycoprotein chain A; Alpha-2-HS-glycoprotein chain B]	7	0.993	6	0.564	-2.868	0.01
482	spt|P51991|ROA3_HUMAN	Heterogeneous nuclear ribonucleoprotein A3 (hnRNP A3)	3	0.91	5	1.768	3.026	0.025
483	trm|Q0P5P4|Q0P5P4_HUMAN trm|Q0P5N8|Q0P5N8_HUMAN trm|Q0P5Q0|Q0P5Q0_HUMAN	TMSB4X protein (Fragment) TMSB4X protein (Fragment) TMSB4X protein (Fragment)	9	0.791	8	0.931	0.828	0.25
484	trm|Q6PIH7|Q6PIH7_HUMAN	IGKC protein	1	1.099	2	0.696
485	spt|Q08170|SFRS4_HUMAN trm|Q53F45|Q53F45_HUMAN	Splicing factor, arginine/serine-rich 4 (Pre-mRNA-splicing factor SRP75) (SRP001LB) "Splicing factor, arginine/serine-rich 4 variant (Fragment) "	0		0
486	spt|Q07666|SAM68_HUMAN	KH domain-containing, RNA-binding, signal transduction-associated protein 1 (p21 Ras GTPase-activating protein-associated p62) (GAP- associated tyrosine phosphoprotein p62) (Src-associated in mitosis 68 kDa protein) (Sam68) (p68)	3	1.058	6	0.991	-0.516	1
487	spt|Q96JQ0|PCD16_HUMAN	Protocadherin-16 precursor (Dachsous 1) (Cadherin-19) (Fibroblast cadherin 1)	1	1.237	2	1.103
488	trm|Q96CG1|Q96CG1_HUMAN spt|P62495|ERF1_HUMAN	ETF1 protein (Eukaryotic translation termination factor 1) Eukaryotic peptide chain release factor subunit 1 (eRF1) (Eukaryotic release factor 1) (TB3-1) (Cl1 protein)	2	1.105	3	1.553
489	spt|Q03252|LMNB2_HUMAN	Lamin-B2	1	0.692	2	0.874
490	trm|Q9BUQ0|Q9BUQ0_HUMAN spt|P26599|PTBP1_HUMAN	Polypyrimidine tract binding protein 1 Polypyrimidine tract-binding protein 1 (PTB) (Heterogeneous nuclear ribonucleoprotein I) (hnRNP I) (57 kDa RNA-binding protein PPTB-1)	3	0.844	3	1.108	1.056	0.2
491	spt|P61160|ARP2_HUMAN	Actin-like protein 2 (Actin-related protein 2)	9	0.961	8	1.063	1.563	0.1
492	spt|P62318|SMD3_HUMAN	Small nuclear ribonucleoprotein Sm D3 (snRNP core protein D3) (Sm-D3)	3	0.966	3	1.327	3.493	0.025
493	spt|P02748|CO9_HUMAN	Complement component C9 precursor [Contains: Complement component C9a; Complement component C9b]	1	1.482	2	0.49
494	trm|Q5JR95|Q5JR95_HUMAN trm|Q9BS10|Q9BS10_HUMAN trm|Q5JR94|Q5JR94_HUMAN spt|P62241|RS8_HUMAN	Ribosomal protein S8 Similar to ribosomal protein S8 (Fragment) Ribosomal protein S8 40S ribosomal protein S8	2	0.951	4	1.17
495	spt|P84103|SFRS3_HUMAN trm|Q5R3J9|Q5R3J9_HUMAN	Splicing factor, arginine/serine-rich 3 (Pre-mRNA-splicing factor SRP20) "Splicing factor, arginine\/serine-rich 3 "	3	0.967	6	1.39	2.547	0.025
496	spt|O15067|PUR4_HUMAN	Phosphoribosylformylglycinamidine synthase (EC 6.3.5.3) (FGAM synthase) (FGAMS) (Formylglycinamide ribotide amidotransferase) (FGARAT) (Formylglycinamide ribotide synthetase)	0		0
497	trm|Q5T9B7|Q5T9B7_HUMAN	Adenylate kinase 1	1	1.025	2	1.16
498	trm|Q8TDJ5|Q8TDJ5_HUMAN trm|Q969I2|Q969I2_HUMAN trm|Q7Z426|Q7Z426_HUMAN spt|Q92734|TFG_HUMAN	TRK-fused gene/anaplastic large cell lymphoma kinase extra long form TRK-fused gene (TFG protein) Putative MAPK activating protein Protein TFG (TRK-fused gene protein)	1	0.99	2	0.717
499	trm|Q6IPX5|Q6IPX5_HUMAN trm|Q3KQT6|Q3KQT6_HUMAN spt|P15880|RS2_HUMAN	Ribosomal protein S2 Ribosomal protein S2 40S ribosomal protein S2 (S4) (LLRep3 protein)	4	0.844	5	1.303	2.349	0.05
500	trm|Q5JPM8|Q5JPM8_HUMAN	Phosphoribosyl pyrophosphate synthetase 1	1	0.718	2	0.845
501	spt|Q9UI30|TR112_HUMAN	TRM112-like protein	1	1.647	2	0.448
502	spt|P07814|SYEP_HUMAN trm|Q5H9S5|Q5H9S5_HUMAN	Bifunctional aminoacyl-tRNA synthetase [Includes: Glutamyl-tRNA synthetase (EC 6.1.1.17) (Glutamate--tRNA ligase); Prolyl-tRNA synthetase (EC 6.1.1.15) (Proline--tRNA ligase)] Hypothetical protein DKFZp313B047	3	1.058	6	1.151	0.623	1
503	spt|Q16698|DECR_HUMAN	2,4-dienoyl-CoA reductase, mitochondrial precursor (EC 1.3.1.34) (2,4- dienoyl-CoA reductase [NADPH]) (4-enoyl-CoA reductase [NADPH])	1	0.782	2	1.156
504	spt|P62826|RAN_HUMAN	GTP-binding nuclear protein Ran (GTPase Ran) (Ras-like protein TC4) (Androgen receptor-associated protein 24)	8	1.106	7	1.034	-0.453	1
505	spt|Q99536|VAT1_HUMAN	Synaptic vesicle membrane protein VAT-1 homolog (EC 1.-.-.-)	6	1.014	4	0.872	-1.613	0.1
506	trm|Q9BV61|Q9BV61_HUMAN trm|Q53G55|Q53G55_HUMAN trm|Q53FS6|Q53FS6_HUMAN spt|Q12931|TRAP1_HUMAN	TRAP1 protein (Fragment) TNF receptor-associated protein 1 variant (Fragment) TNF receptor-associated protein 1 variant (Fragment) "Heat shock protein 75 kDa, mitochondrial precursor (HSP 75) (Tumor necrosis factor type 1 receptor-associated protein) (TRAP-1) (TNFR- associated protein 1) "	0		2	1.691
507	trm|Q5TAY8|Q5TAY8_HUMAN spt|Q13523|PRP4B_HUMAN	PRP4 pre-mRNA processing factor 4 homolog B (Yeast) Serine/threonine-protein kinase PRP4 homolog (EC 2.7.11.1) (PRP4 pre- mRNA-processing factor 4 homolog) (PRP4 kinase)	0		0
508	spt|P08603|CFAH_HUMAN	Complement factor H precursor (H factor 1)	6	1.163	4	1.663	0.602	1
509	spt|O95433|AHSA1_HUMAN	Activator of 90 kDa heat shock protein ATPase homolog 1 (AHA1) (p38)	1	0.98	2	0.756
510	spt|Q9BPW8|NIPS1_HUMAN	Protein NipSnap1	1	0.883	2	0.759
511	spt|Q92499|DDX1_HUMAN	ATP-dependent RNA helicase DDX1 (EC 3.6.1.-) (DEAD box protein 1) (DEAD box protein retinoblastoma) (DBP-RB)	1	0.828	2	0.341
512	trm|Q9BWA5|Q9BWA5_HUMAN spt|P80723|BASP_HUMAN	Brain abundant, membrane attached signal protein 1 Brain acid soluble protein 1 (BASP1 protein) (Neuronal axonal membrane protein NAP-22) (22 kDa neuronal tissue-enriched acidic protein)	6	1.013	7	0.604	-1.447	0.1
513	spt|P60981|DEST_HUMAN	Destrin (Actin-depolymerizing factor) (ADF)	7	0.915	8	0.753	-1.764	0.1
514	trm|Q86VX4|Q86VX4_HUMAN spt|Q9UQE7|SMC3_HUMAN	Structural maintenance of chromosomes 3 Structural maintenance of chromosome 3 (Chondroitin sulfate proteoglycan 6) (Chromosome-associated polypeptide) (hCAP) (Bamacan) (Basement membrane-associated chondroitin proteoglycan)	1	0.711	2	0.892
515	spt|P46459|NSF_HUMAN trm|Q8N6D7|Q8N6D7_HUMAN	Vesicle-fusing ATPase (EC 3.6.4.6) (Vesicular-fusion protein NSF) (N- ethylmaleimide sensitive fusion protein) (NEM-sensitive fusion protein) N-ethylmaleimide-sensitive factor	2	0.825	4	0.751
516	spt|P38606|VATA1_HUMAN spt|P38607|VATA2_HUMAN	Vacuolar ATP synthase catalytic subunit A, ubiquitous isoform (EC 3.6.3.14) (V-ATPase subunit A 1) (Vacuolar proton pump alpha subunit 1) (V-ATPase 69 kDa subunit 1) (Isoform VA68) "Vacuolar ATP synthase catalytic subunit A, osteoclast isoform (EC 3.6.3.14) (V-ATPase subunit A 2) (Vacuolar proton pump alpha subunit 2) (V-ATPase 69 kDa subunit 2) (Isoform HO68) "	2	1.196	5	1.303
517	trm|Q86WL3|Q86WL3_HUMAN trm|Q5LJ99|Q5LJ99_HUMAN trm|Q5LJA0|Q5LJA0_HUMAN trm|Q5LJ98|Q5LJ98_HUMAN trm|Q86WL4|Q86WL4_HUMAN spt|P10155|RO60_HUMAN	Gastric cancer multi-drug resistance protein variant "Sjogren syndrome antigen A2 (60kDa, ribonucleoprotein autoantigen SS- A\/Ro) " "Sjogren syndrome antigen A2 (60kDa, ribonucleoprotein autoantigen SS- A\/Ro) " "Sjogren syndrome antigen A2 (60kDa, ribonucleoprotein autoantigen SS- A\/Ro) " Gastric cancer multi-drug resistance protein variant 60 kDa SS-A/Ro ribonucleoprotein (60 kDa Ro protein) …	4	1.129	3	1.847	2.163	0.05
518	trm|Q5T787|Q5T787_HUMAN spt|Q15814|TBCC_HUMAN	OTTHUMP00000016406 Tubulin-specific chaperone C (Tubulin-folding cofactor C) (CFC)	0		0
519	spt|P30520|PURA2_HUMAN	Adenylosuccinate synthetase isozyme 2 (EC 6.3.4.4) (Adenylosuccinate synthetase, acidic isozyme) (IMP--aspartate ligase 2) (AdSS 2) (AMPSase 2)	1	1.122	2	0.802
520	trm|Q6DKI2|Q6DKI2_HUMAN	Similar to galectin 9 short isoform	0		0
521	spt|Q16181|SEPT7_HUMAN trm|Q309B3|Q309B3_HUMAN trm|Q52M76|Q52M76_HUMAN trm|Q3LIE9|Q3LIE9_HUMAN trm|Q59EY4|Q59EY4_HUMAN trm|Q8TC62|Q8TC62_HUMAN	Septin-7 (CDC10 protein homolog) Septin 7 SEPT7 protein (Fragment) Predicted protein product of Nbla02942 CDC10 protein variant (Fragment) CDC10 protein (Hypothetical protein DKFZp686F17268) (Fragment)	6	0.978	6	1.089	0.409	1
522	trm|Q8WXF1|Q8WXF1_HUMAN trm|Q8WXE8|Q8WXE8_HUMAN trm|Q9NV36|Q9NV36_HUMAN	Paraspeckle protein 1 alpha isoform (Paraspeckle component 1) Paraspeckle protein 1 beta isoform (Paraspeckle component 1) "CDNA FLJ10955 fis, clone PLACE1000406, moderately similar to PTB- ASSOCIATED SPLICING FACTOR (PSPC1 protein) "	0		2	0.764
523	trm|Q7Z523|Q7Z523_HUMAN	ARC16-2	1	1.357	2	2.586
524	trm|Q59FV9|Q59FV9_HUMAN	PTK7 protein tyrosine kinase 7 isoform a variant (Fragment)	1	1.28	2	0.934
525	trm|Q5U0C0|Q5U0C0_HUMAN spt|P61313|RL15_HUMAN	Ribosomal protein L15 60S ribosomal protein L15	2	0.848	4	1.645
526	spt|P17812|PYRG1_HUMAN	CTP synthase 1 (EC 6.3.4.2) (UTP--ammonia ligase 1) (CTP synthetase 1)	0		0
527	spt|O60547|GMDS_HUMAN	GDP-mannose 4,6 dehydratase (EC 4.2.1.47) (GDP-D-mannose dehydratase) (GMD)	2	0.822	4	1.557
528	trm|Q9Y3E8|Q9Y3E8_HUMAN trm|Q9H3J8|Q9H3J8_HUMAN trm|Q9HC37|Q9HC37_HUMAN trm|Q9HC38|Q9HC38_HUMAN trm|Q96B89|Q96B89_HUMAN	CGI-150 protein My027 protein (Chromosome 17 open reading frame 25) Hypothetical protein Hypothetical protein Chromosome 17 open reading frame 25	3	0.965	6	1.103	1.802	0.1
529	trm|Q5JQ37|Q5JQ37_HUMAN trm|Q5BJH1|Q5BJH1_HUMAN trm|Q59EN5|Q59EN5_HUMAN trm|Q53FJ5|Q53FJ5_HUMAN spt|P07602|SAP_HUMAN	Prosaposin (Variant Gaucher disease and variant metachromatic leukodystrophy) PSAP protein Prosaposin variant (Fragment) Prosaposin (Variant Gaucher disease and variant metachromatic leukodystrophy) variant (Fragment) Proactivator polypeptide precursor [Contains: Saposin A (Protein A); Saposin B-Val; Saposin B (Sphingolipid activator protein 1) (SAP-1) (Cerebroside sulfate activator) (CSAct) (Dis…	6	1.027	3	2.94	3.932	0.005
530	spt|P82979|HCC1_HUMAN	Nuclear protein Hcc-1 (Proliferation-associated cytokine-inducible protein CIP29) (Cytokine-induced protein of 29 kDa)	5	1.045	7	1.037	-0.108	1
531	trm|Q32Q25|Q32Q25_HUMAN spt|Q9NUW8|TYDP1_HUMAN	TDP1 protein Tyrosyl-DNA phosphodiesterase 1 (EC 3.1.4.-) (Tyr-DNA phosphodiesterase 1)	0		0
532	spt|P19623|SPEE_HUMAN	Spermidine synthase (EC 2.5.1.16) (Putrescine aminopropyltransferase) (SPDSY)	2	0.932	4	0.594
533	trm|Q6IBT7|Q6IBT7_HUMAN trm|Q86WI9|Q86WI9_HUMAN trm|Q96CU0|Q96CU0_HUMAN trm|Q96AU9|Q96AU9_HUMAN trm|Q8WU07|Q8WU07_HUMAN spt|P02792|FRIL_HUMAN	Ferritin Ferritin-like protein "Ferritin, light polypeptide " "Ferritin, light polypeptide " "Ferritin, light polypeptide " Ferritin light chain (Ferritin L subunit)	2	1.298	3	1.268
534	spt|P27348|1433T_HUMAN	14-3-3 protein theta (14-3-3 protein tau) (14-3-3 protein T-cell) (HS1 protein)	9	1.003	8	0.922	-0.859	0.25
535	spt|P58107|EPIPL_HUMAN	Epiplakin (450 kDa epidermal antigen)	1	1.785	2	3.474
536	trm|Q59E99|Q59E99_HUMAN	Thrombospondin 1 variant (Fragment)	0		0
537	trm|Q53EN5|Q53EN5_HUMAN trm|Q9NSN1|Q9NSN1_HUMAN	KIAA1168 protein variant (Fragment) Hypothetical protein DKFZp761H087 (Fragment)	1	1.311	2	0.822
538	spt|P51610|HCFC1_HUMAN	Host cell factor (HCF) (HCF-1) (C1 factor) (VP16 accessory protein) (VCAF) (CFF) [Contains: HCF N-terminal chain 1; HCF N-terminal chain 2; HCF N-terminal chain 3; HCF N-terminal chain 4; HCF N-terminal chain 5; HCF N-terminal chain 6; HCF C-terminal chain 1; HCF C- terminal chain 2; HCF C-terminal chain 3; HCF C-terminal chain 4; HCF C-terminal chain 5; HCF C-terminal chain 6]	0		0
539	spt|O43290|SNUT1_HUMAN	U4/U6.U5 tri-snRNP-associated protein 1 (U4/U6.U5 tri-snRNP-associated 110 kDa protein) (Squamous cell carcinoma antigen recognized by T cells 1) (SART-1) (hSART-1) (hSnu66)	1	1.241	2	0.899
540	trm|Q96IM0|Q96IM0_HUMAN trm|O14979|O14979_HUMAN trm|Q96S43|Q96S43_HUMAN trm|Q7KZ75|Q7KZ75_HUMAN trm|Q6SPF2|Q6SPF2_HUMAN trm|Q7KZ74|Q7KZ74_HUMAN	HNRPDL protein (Fragment) JKTBP2 (Hypothetical protein HNRPDL) (Heterogeneous nuclear ribonucleoprotein D-like) (HNRPDL protein) JKTBP1delta6 HnRNP JKTBP protein (JKTBP1) CArG binding factor A+U-rich element RNA binding factor	1	1.004	2	1.129
541	trm|Q5T5N2|Q5T5N2_HUMAN trm|Q59GA5|Q59GA5_HUMAN spt|P14735|IDE_HUMAN	Insulin-degrading enzyme Insulysin variant (Fragment) Insulin-degrading enzyme (EC 3.4.24.56) (Insulysin) (Insulinase) (Insulin protease)	0		0
542	spt|P11172|PYR5_HUMAN	Uridine 5'-monophosphate synthase (UMP synthase) [Includes: Orotate phosphoribosyltransferase (EC 2.4.2.10) (OPRTase); Orotidine 5'- phosphate decarboxylase (EC 4.1.1.23) (OMPdecase)]	0		0
543	trm|Q6NW36|Q6NW36_HUMAN trm|Q53HB3|Q53HB3_HUMAN spt|P62191|PRS4_HUMAN	Proteasome (Prosome, macropain) 26S subunit, ATPase, 1 Proteasome 26S ATPase subunit 1 variant (Fragment) 26S protease regulatory subunit 4 (P26s4) (Proteasome 26S subunit ATPase 1)	2	1.269	4	0.951
544	spt|P20592|MX2_HUMAN trm|Q75MY7|Q75MY7_HUMAN	Interferon-induced GTP-binding protein Mx2 (Interferon-regulated resistance GTP-binding protein MxB) (p78-related protein) MX2 (Fragment)	1	0.602	2	0.557
545	trm|Q53HJ8|Q53HJ8_HUMAN	PKCI-1-related HIT protein variant (Fragment)	1	1.658	3	1.214
546	spt|P61956|SUMO2_HUMAN spt|P55854|SUMO3_HUMAN	Small ubiquitin-related modifier 2 precursor (SUMO-2) (Ubiquitin-like protein SMT3B) (SMT3 homolog 2) (Sentrin-2) (HSMT3) Small ubiquitin-related modifier 3 precursor (SUMO-3) (Ubiquitin-like protein SMT3A) (SMT3 homolog 1)	7	0.998	8	1.079	0.634	1
547	trm|Q7Z508|Q7Z508_HUMAN trm|Q7Z4C5|Q7Z4C5_HUMAN trm|Q9UHY7|Q9UHY7_HUMAN	MasA MSTP145 protein "E-1 enzyme (MASA protein) (CDNA FLJ12594 fis, clone NT2RM4001340, weakly similar to UTR4 PROTEIN) "	0		0
548	spt|Q9HD42|CHM1A_HUMAN	Charged multivesicular body protein 1a (Chromatin-modifying protein 1a) (CHMP1a) (Vacuolar protein sorting 46-1) (Vps46-1) (hVps46-1)	1	1.496	2	1.352
549	spt|Q04917|1433F_HUMAN	14-3-3 protein eta (Protein AS1)	6	1.114	3	1.127	0.086	1
550	spt|Q9UHD8|SEPT9_HUMAN	Septin-9 (MLL septin-like fusion protein) (MLL septin-like fusion protein MSF-A) (Ovarian/Breast septin) (Ov/Br septin) (Septin D1)	9	1.002	8	0.93	-0.531	1
551	spt|Q15075|EEA1_HUMAN	Early endosome antigen 1 (Endosome-associated protein p162) (Zinc finger FYVE domain-containing protein 2)	0		2	1.492
552	trm|Q2HJ14|Q2HJ14_HUMAN spt|Q9Y6K5|OAS3_HUMAN	2'-5'-oligoadenylate synthetase 3, 100kDa 2'-5'-oligoadenylate synthetase 3 (EC 2.7.7.-) ((2-5')oligo(A) synthetase 3) (2-5A synthetase 3) (p100 OAS) (p100OAS)	0		0
553	trm|Q9UCX8|Q9UCX8_HUMAN spt|P55327|TPD52_HUMAN trm|Q6FGS3|Q6FGS3_HUMAN trm|Q53EK8|Q53EK8_HUMAN	N8 protein long isoform (Fragment) Tumor protein D52 (N8 protein) TPD52 protein N8 protein long isoform variant (Fragment)	0		0
554	spt|P25205|MCM3_HUMAN trm|Q53HJ4|Q53HJ4_HUMAN	DNA replication licensing factor MCM3 (DNA polymerase alpha holoenzyme-associated protein P1) (RLF subunit beta) (P102 protein) (P1-MCM3) Minichromosome maintenance protein 3 variant (Fragment)	0		2	3.045
555	spt|Q9UJU6|DBNL_HUMAN trm|Q59FH4|Q59FH4_HUMAN	Drebrin-like protein (SH3 domain-containing protein 7) (Drebrin F) (Cervical SH3P7) (HPK1-interacting protein of 55 kDa) (HIP-55) (Cervical mucin-associated protein) Drebrin-like protein variant (Fragment)	1	1.712	3	1.055
557	trm|Q53HU9|Q53HU9_HUMAN trm|Q53HT9|Q53HT9_HUMAN spt|P00736|C1R_HUMAN	Complement component 1, r subcomponent variant (Fragment) "Complement component 1, r subcomponent variant (Fragment) " "Complement C1r subcomponent precursor (EC 3.4.21.41) (Complement component 1, r subcomponent) [Contains: Complement C1r subcomponent heavy chain; Complement C1r subcomponent light chain] "	1	10.59	0
558	spt|Q9H223|EHD4_HUMAN	EH-domain-containing protein 4 (Hepatocellular carcinoma-associated protein 10/11)	1	1.284	2	0.718
559	trm|Q68E05|Q68E05_HUMAN spt|O43399|TPD54_HUMAN trm|Q53GA0|Q53GA0_HUMAN trm|Q5U0E0|Q5U0E0_HUMAN trm|Q5JWU8|Q5JWU8_HUMAN trm|Q5JWU6|Q5JWU6_HUMAN trm|Q5JWU5|Q5JWU5_HUMAN	Hypothetical protein DKFZp686A1765 (OTTHUMP00000031615) Tumor protein D54 (hD54) (Tumor protein D52-like 2) Tumor protein D52-like 2 isoform e variant (Fragment) Tumor protein D52-like 2 (OTTHUMP00000031617) OTTHUMP00000031616 OTTHUMP00000031614 OTTHUMP00000031612	7	0.957	5	0.989	0.283	1
560	trm|Q53Y18|Q53Y18_HUMAN spt|P02679|FIBG_HUMAN	Fibrinogen, gamma polypeptide Fibrinogen gamma chain precursor	8	0.747	7	0.356	-2.469	0.025
561	trm|Q4JM47|Q4JM47_HUMAN spt|O95994|AGR2_HUMAN trm|Q53G64|Q53G64_HUMAN	AGR2 Anterior gradient protein 2 homolog precursor (Secreted cement gland protein XAG-2 homolog) (AG-2 protein) (hAG-2) (HPC8) Anterior gradient 2 homolog (Fragment)	6	1.039	8	1.821	2.669	0.025
562	spt|P23193|TCEA1_HUMAN	Transcription elongation factor A protein 1 (Transcription elongation factor S-II protein 1) (Transcription elongation factor TFIIS.o)	2	0.797	4	0.909
563	spt|Q9UL46|PSME2_HUMAN	Proteasome activator complex subunit 2 (Proteasome activator 28- subunit beta) (PA28beta) (PA28b) (Activator of multicatalytic protease subunit 2) (11S regulator complex subunit beta) (REG-beta)	7	0.892	5	1.127	1.573	0.1
564	spt|Q07960|RHG01_HUMAN	Rho-GTPase-activating protein 1 (GTPase-activating protein rhoOGAP) (Rho-related small GTPase protein activator) (CDC42 GTPase-activating protein) (p50-RhoGAP)	7	0.832	5	0.953	0.797	0.25
565	spt|P51149|RAB7_HUMAN	Ras-related protein Rab-7	4	0.948	2	1.006
566	trm|Q569I9|Q569I9_HUMAN	IGKC protein	1	2.224	2	0.673
567	spt|P35241|RADI_HUMAN	Radixin	0		0
568	spt|Q14315|FLNC_HUMAN	Filamin-C (Gamma-filamin) (Filamin-2) (Protein FLNc) (Actin-binding- like protein) (ABP-L) (ABP-280-like protein)	6	0.951	3	0.528	-2.86	0.025
569	trm|Q86U01|Q86U01_HUMAN	Full-length cDNA clone CS0DC022YA24 of Neuroblastoma of Homo sapiens (human) (Fragment)	0		2	2.201
570	trm|Q8IYH3|Q8IYH3_HUMAN spt|Q92839|HAS1_HUMAN trm|Q9NS49|Q9NS49_HUMAN	Hyaluronan synthase 1 Hyaluronan synthase 1 (EC 2.4.1.212) (Hyaluronate synthase 1) (Hyaluronic acid synthase 1) (HA synthase 1) (HuHAS1) Hyaluronan synthase 1	0		0
571	spt|O43765|SGTA_HUMAN	Small glutamine-rich tetratricopeptide repeat-containing protein A (Vpu-binding protein) (UBP)	0		2	2.921
573	trm|Q53G49|Q53G49_HUMAN spt|P84098|RL19_HUMAN	Ribosomal protein L19 variant (Fragment) 60S ribosomal protein L19	3	0.98	3	1.983	2.623	0.05
574	spt|Q16630|CPSF6_HUMAN	Cleavage and polyadenylation specificity factor 6 (Cleavage and polyadenylation specificity factor 68 kDa subunit) (CPSF 68 kDa subunit) (Pre-mRNA cleavage factor Im 68 kDa subunit) (Protein HPBRII- 4/7)	2	0.729	5	0.761
575	trm|Q8WYK5|Q8WYK5_HUMAN trm|Q53HQ2|Q53HQ2_HUMAN spt|P23588|IF4B_HUMAN trm|Q4G0E3|Q4G0E3_HUMAN trm|Q6GPH5|Q6GPH5_HUMAN trm|Q7Z5Y0|Q7Z5Y0_HUMAN trm|Q6IB46|Q6IB46_HUMAN	Eukaryotic initiation factor 4B (Eukaryotic translation initiation factor 4B) Eukaryotic translation initiation factor 4B variant (Fragment) Eukaryotic translation initiation factor 4B (eIF-4B) Eukaryotic translation initiation factor 4B Eukaryotic translation initiation factor 4B EIF4B protein (Fragment) EIF4B protein	4	1.019	5	0.577	-1.877	0.1
576	trm|Q86Z22|Q86Z22_HUMAN	Hypothetical protein	4	1.193	8	1.006	-0.769	0.25
577	spt|Q15459|SF3A1_HUMAN	Splicing factor 3 subunit 1 (Spliceosome-associated protein 114) (SAP 114) (SF3a120)	4	1.045	5	1.695	2.44	0.025
578	trm|Q59GM9|Q59GM9_HUMAN trm|Q641R5|Q641R5_HUMAN spt|P11217|PYGM_HUMAN spt|P06737|PYGL_HUMAN spt|P11216|PYGB_HUMAN	Brain glycogen phosphorylase variant (Fragment) "Phosphorylase, glycogen; liver (Hers disease, glycogen storage disease type VI) " "Glycogen phosphorylase, muscle form (EC 2.4.1.1) (Myophosphorylase) " "Glycogen phosphorylase, liver form (EC 2.4.1.1) " "Glycogen phosphorylase, brain form (EC 2.4.1.1) "	3	0.88	6	0.968	0.916	0.2
579	trm|Q86XM2|Q86XM2_HUMAN spt|P35611|ADDA_HUMAN	ADD1 protein Alpha-adducin (Erythrocyte adducin subunit alpha)	0		0
580	trm|Q53HR0|Q53HR0_HUMAN trm|Q53HG0|Q53HG0_HUMAN spt|O15372|IF33_HUMAN trm|Q5BKY2|Q5BKY2_HUMAN	Eukaryotic translation initiation factor 3, subunit 3 gamma, 40kDa variant (Fragment) "Eukaryotic translation initiation factor 3, subunit 3 gamma, 40kDa variant (Fragment) " Eukaryotic translation initiation factor 3 subunit 3 (eIF-3 gamma) (eIF3 p40 subunit) (eIF3h) EIF3S3 protein	0		0
581	trm|Q4KKU6|Q4KKU6_HUMAN spt|Q14126|DSG2_HUMAN	Desmoglein 2 Desmoglein-2 precursor (HDGC)	0		0
582	trm|Q59EV8|Q59EV8_HUMAN spt|P09622|DLDH_HUMAN trm|Q8WTS4|Q8WTS4_HUMAN	Dihydrolipoamide dehydrogenase, variant (Fragment) "Dihydrolipoyl dehydrogenase, mitochondrial precursor (EC 1.8.1.4) (Dihydrolipoamide dehydrogenase) (Glycine cleavage system L protein) " Dihydrolipoamide dehydrogenase	4	0.926	2	1.194
583	trm|Q8N6D8|Q8N6D8_HUMAN spt|Q969S9|EFG2_HUMAN trm|Q9H6Z1|Q9H6Z1_HUMAN	G elongation factor, mitochondrial 2 "Elongation factor G 2, mitochondrial precursor (mEF-G 2) (Elongation factor G2) " "CDNA: FLJ21661 fis, clone COL08837 "	0		0
584	trm|Q5D027|Q5D027_HUMAN spt|Q9UHD9|UBQL2_HUMAN	UBQLN2 protein Ubiquilin-2 (Protein linking IAP with cytoskeleton 2) (PLIC-2) (hPLIC- 2) (Ubiquitin-like product Chap1/Dsk2) (DSK2 homolog) (Chap1)	0		1	1.784
585	trm|Q53H41|Q53H41_HUMAN spt|P08559|ODPA_HUMAN trm|Q53GE3|Q53GE3_HUMAN trm|Q5JPU1|Q5JPU1_HUMAN trm|Q5JPT9|Q5JPT9_HUMAN trm|Q5JPU0|Q5JPU0_HUMAN	Pyruvate dehydrogenase (Lipoamide) alpha 1 variant (Fragment) "Pyruvate dehydrogenase E1 component alpha subunit, somatic form, mitochondrial precursor (EC 1.2.4.1) (PDHE1-A type I) " Pyruvate dehydrogenase (Lipoamide) alpha 1 variant (Fragment) Pyruvate dehydrogenase (Lipoamide) alpha 1 (Fragment) Pyruvate dehydrogenase (Lipoamide) alpha 1 (Fragment) Pyruvate dehydrogenase (Lipoamide) alpha 1	3	0.944	3	0.931	-0.141	1
586	trm|Q53FN1|Q53FN1_HUMAN spt|P52943|CRIP2_HUMAN	Cysteine-rich protein 2 variant (Fragment) Cysteine-rich protein 2 (CRP2) (Protein ESP1)	4	1.167	4	1.366	0.248	1
587	spt|Q9BZZ5|API5_HUMAN	Apoptosis inhibitor 5 (API-5) (Fibroblast growth factor 2-interacting factor) (FIF) (Protein XAGL) (Antiapoptosis clone 11 protein) (AAC- 11)	0		0
588	trm|Q96EN6|Q96EN6_HUMAN spt|O43490|PROM1_HUMAN trm|Q6SV49|Q6SV49_HUMAN trm|Q6SV50|Q6SV50_HUMAN trm|Q6SV51|Q6SV51_HUMAN trm|Q6SV52|Q6SV52_HUMAN trm|Q6SV53|Q6SV53_HUMAN	PROM1 protein (Hypothetical protein PROM1) (AC133-2 antigen) (MSTP061) Prominin-1 precursor (Prominin-like protein 1) (Antigen AC133) (CD133 antigen) Prominin 1 isoform s7 Prominin 1 isoform s6 Prominin 1 isoform s5 Prominin 1 isoform s4 Prominin 1 isoform s3	0		0
589	trm|Q53SB6|Q53SB6_HUMAN trm|Q9NV55|Q9NV55_HUMAN	Hypothetical protein DNPEP "CDNA FLJ10915 fis, clone OVARC1000288, weakly similar to VACUOLAR AMINOPEPTIDASE I (EC 3.4.11.22) "	1	1.228	2	1.023
590	spt|P60900|PSA6_HUMAN	Proteasome subunit alpha type 6 (EC 3.4.25.1) (Proteasome iota chain) (Macropain iota chain) (Multicatalytic endopeptidase complex iota chain) (27 kDa prosomal protein) (PROS-27) (p27K)	9	0.965	9	1.006	0.515	1
591	spt|O14744|ANM5_HUMAN	Protein arginine N-methyltransferase 5 (EC 2.1.1.125) (EC 2.1.1.-) (Shk1 kinase-binding protein 1 homolog) (SKB1Hs) (Jak-binding protein 1) (72 kDa ICln-binding protein)	0		2	1.108
592	spt|P62263|RS14_HUMAN	40S ribosomal protein S14	3	0.912	3	1.863	5.369	0.005
593	spt|O14818|PSA7_HUMAN trm|Q5JXJ1|Q5JXJ1_HUMAN	Proteasome subunit alpha type 7 (EC 3.4.25.1) (Proteasome subunit RC6- 1) (Proteasome subunit XAPC7) OTTHUMP00000031453 (Fragment)	1	0.791	2	1.283
594	trm|Q96DV6|Q96DV6_HUMAN spt|P62753|RS6_HUMAN	Ribosomal protein S6 40S ribosomal protein S6 (Phosphoprotein NP33)	4	0.917	4	1.482	2.195	0.05
595	trm|Q6ZMS3|Q6ZMS3_HUMAN trm|Q9BTA4|Q9BTA4_HUMAN trm|Q6AWD1|Q6AWD1_HUMAN trm|Q6AI18|Q6AI18_HUMAN spt|P21291|CSRP1_HUMAN trm|Q5U0J2|Q5U0J2_HUMAN	CDNA FLJ16726 fis, clone UTERU3014791 Similar to cysteine and glycine-rich protein 1 (Fragment) Hypothetical protein DKFZp686P2249 (Fragment) Hypothetical protein DKFZp686M148 (Fragment) Cysteine and glycine-rich protein 1 (Cysteine-rich protein 1) (CRP1) (CRP) Cysteine and glycine-rich protein 1	10	0.816	10	0.726	-0.463	1
596	trm|Q6YN16|Q6YN16_HUMAN trm|Q9BT58|Q9BT58_HUMAN	Hydroxysteroid dehydrogenase-like protein (Hydroxysteroid dehydrogenase like 2) HSDL2 protein	1	0.599	2	0.769
597	trm|Q5M7Z5|Q5M7Z5_HUMAN spt|Q9UBQ7|GRHPR_HUMAN	GRHPR protein (Fragment) Glyoxylate reductase/hydroxypyruvate reductase (EC 1.1.1.79)	2	0.786	1	1.432
598	trm|Q6X735|Q6X735_HUMAN spt|Q9GZT8|NIF3L_HUMAN trm|Q6X734|Q6X734_HUMAN trm|Q53TX4|Q53TX4_HUMAN trm|Q658J0|Q658J0_HUMAN	NIF3L1 isoform beta NIF3-like protein 1 (Amyotrophic lateral sclerosis 2 chromosomal region candidate gene 1 protein) NIF3L1 isoform gamma Hypothetical protein NIF3L1 Hypothetical protein DKFZp762L015 (Fragment)	0		2	1.036
599	trm|Q53G61|Q53G61_HUMAN spt|P09661|RU2A_HUMAN trm|Q53G21|Q53G21_HUMAN	Small nuclear ribonucleoprotein polypeptide A' variant (Fragment) U2 small nuclear ribonucleoprotein A' (U2 snRNP-A') Small nuclear ribonucleoprotein polypeptide A' variant (Fragment)	2	0.952	3	1.987
600	trm|Q53FK4|Q53FK4_HUMAN trm|Q6PKH8|Q6PKH8_HUMAN trm|Q3KPI8|Q3KPI8_HUMAN spt|P39687|AN32A_HUMAN	Acidic (Leucine-rich) nuclear phosphoprotein 32 family, member A variant (Fragment) ANP32A protein (Fragment) ANP32A protein Acidic leucine-rich nuclear phosphoprotein 32 family member A (Potent heat-stable protein phosphatase 2A inhibitor I1PP2A) (Acidic nuclear phosphoprotein pp32) (Leucine-rich acidic nuclear protein) (Lanp) (Putative HLA-DR-associated protein I) (PHAPI) (Mapmodulin)	6	0.97	5	1.228	2.434	0.025
601	spt|P00915|CAH1_HUMAN	Carbonic anhydrase 1 (EC 4.2.1.1) (Carbonic anhydrase I) (Carbonate dehydratase I) (CA-I)	9	0.872	9	0.707	-1.247	0.15
602	trm|Q6IB11|Q6IB11_HUMAN spt|O00264|PGRC1_HUMAN	PGRMC1 protein (Progesterone receptor membrane component 1) Membrane-associated progesterone receptor component 1 (mPR)	1	1.062	2	0.871
603	spt|Q01105|SET_HUMAN trm|Q5VXV2|Q5VXV2_HUMAN trm|Q6FHZ5|Q6FHZ5_HUMAN	Protein SET (Phosphatase 2A inhibitor I2PP2A) (I-2PP2A) (Template- activating factor I) (TAF-I) (HLA-DR-associated protein II) (PHAPII) (Inhibitor of granzyme A-activated DNase) (IGAAD) SET translocation (Myeloid leukemia-associated) SET protein (Hypothetical protein SET)	9	0.934	9	1.154	1.939	0.05
604	trm|Q5JX81|Q5JX81_HUMAN	OTTHUMP00000030114	0		2	1.377
605	spt|P62316|SMD2_HUMAN	Small nuclear ribonucleoprotein Sm D2 (snRNP core protein D2) (Sm-D2)	1	1.022	2	1.664
606	trm|Q6IBM5|Q6IBM5_HUMAN spt|P52565|GDIR_HUMAN	ARHGDIA protein (Rho GDP dissociation inhibitor (GDI) alpha) Rho GDP-dissociation inhibitor 1 (Rho GDI 1) (Rho-GDI alpha)	9	1.017	10	1.024	0.07	1
607	spt|P20962|PTMS_HUMAN	Parathymosin	6	1.047	8	0.8	-2.428	0.025
608	trm|Q7Z4W8|Q7Z4W8_HUMAN trm|Q6IBD1|Q6IBD1_HUMAN spt|P35268|RL22_HUMAN	Heparin-binding protein HBp15 RPL22 protein (Ribosomal protein L22) 60S ribosomal protein L22 (Epstein-Barr virus small RNA-associated protein) (EBER-associated protein) (EAP) (Heparin-binding protein HBp15)	1	0.873	2	1.594
609	trm|Q6N096|Q6N096_HUMAN	Hypothetical protein DKFZp686I15196	1	0.918	2	1.106
610	trm|Q6MZQ6|Q6MZQ6_HUMAN	Hypothetical protein DKFZp686G11190	3	0.87	6	0.777	-0.574	1
611	trm|Q6P089|Q6P089_HUMAN	Hypothetical protein	0		0
612	trm|Q562Z6|Q562Z6_HUMAN	Actin-like protein (Fragment)	2	1.045	4	0.956
613	trm|Q7Z2U7|Q7Z2U7_HUMAN	Hypothetical protein	1	2.501	2	0.83
614	spt|P15153|RAC2_HUMAN	Ras-related C3 botulinum toxin substrate 2 precursor (p21-Rac2) (Small G protein) (GX)	5	1.08	3	1.453	0.601	1
615	spt|Q14194|DPYL1_HUMAN	Dihydropyrimidinase-related protein 1 (DRP-1) (Collapsin response mediator protein 1) (CRMP-1)	1	0.943	2	0.33
616	spt|Q13162|PRDX4_HUMAN	Peroxiredoxin-4 (EC 1.11.1.15) (Prx-IV) (Thioredoxin peroxidase AO372) (Thioredoxin-dependent peroxide reductase A0372) (Antioxidant enzyme AOE372) (AOE37-2)	6	0.816	3	0.652	-0.565	1
617	spt|P52597|HNRPF_HUMAN	Heterogeneous nuclear ribonucleoprotein F (hnRNP F) (Nucleolin-like protein mcs94-1)	7	1.016	4	1.171	0.597	1
618	spt|P52907|CAZA1_HUMAN	F-actin capping protein alpha-1 subunit (CapZ alpha-1)	5	0.804	4	0.819	0.067	1
619	spt|P50914|RL14_HUMAN	60S ribosomal protein L14 (CAG-ISL 7)	1	1.379	2	1.949
620	spt|P61006|RAB8A_HUMAN	Ras-related protein Rab-8A (Oncogene c-mel)	0		0
621	spt|P01598|KV1F_HUMAN spt|P01602|KV1J_HUMAN	Ig kappa chain V-I region EU Ig kappa chain V-I region HK102 precursor (Fragment)	0		0
622	spt|P62195|PRS8_HUMAN trm|Q59GS3|Q59GS3_HUMAN	26S protease regulatory subunit 8 (Proteasome 26S subunit ATPase 5) (Proteasome subunit p45) (p45/SUG) (Thyroid hormone receptor- interacting protein 1) (TRIP1) Proteasome 26S ATPase subunit 5 variant (Fragment)	2	0.882	1	0.98
623	trm|Q6GTW4|Q6GTW4_HUMAN spt|P55290|CAD13_HUMAN	Cadherin 13, H-cadherin (Heart) Cadherin-13 precursor (Truncated-cadherin) (T-cadherin) (T-cad) (Heart-cadherin) (H-cadherin) (P105)	3	1.55	0
624	spt|Q8IY67|RAVR1_HUMAN	Ribonucleoprotein PTB-binding 1 (Protein raver-1)	1	0.971	2	1
625	spt|O00233|PSMD9_HUMAN	26S proteasome non-ATPase regulatory subunit 9 (26S proteasome regulatory subunit p27)	0		0
626	spt|P63208|SKP1_HUMAN	S-phase kinase-associated protein 1A (Cyclin A/CDK2-associated protein p19) (p19A) (p19skp1) (RNA polymerase II elongation factor-like protein) (Organ of Corti protein 2) (OCP-II protein) (OCP-2) (Transcription elongation factor B) (SIII)	0		2	2.767
627	trm|Q5VZU9|Q5VZU9_HUMAN spt|P29144|TPP2_HUMAN trm|Q5VZU8|Q5VZU8_HUMAN trm|Q5VZV2|Q5VZV2_HUMAN	Tripeptidyl peptidase II Tripeptidyl-peptidase 2 (EC 3.4.14.10) (Tripeptidyl-peptidase II) (TPP-II) (Tripeptidyl aminopeptidase) Tripeptidyl peptidase II Tripeptidyl peptidase II	0		2	2.007
628	trm|Q32P45|Q32P45_HUMAN spt|Q13283|G3BP_HUMAN trm|Q53HH4|Q53HH4_HUMAN trm|Q6FI03|Q6FI03_HUMAN	Ras-GTPase-activating protein SH3-domain-binding protein Ras-GTPase-activating protein-binding protein 1 (EC 3.6.1.-) (ATP- dependent DNA helicase VIII) (GAP SH3-domain-binding protein 1) (G3BP- 1) (HDH-VIII) Ras-GTPase-activating protein SH3-domain-binding protein variant (Fragment) G3BP protein	2	0.921	1	1.357
629	spt|Q5T447|HECD3_HUMAN	Probable E3 ubiquitin-protein ligase HECTD3 (HECT domain-containing protein 3)	0		0
630	trm|Q69YJ7|Q69YJ7_HUMAN spt|Q9NTZ6|RBM12_HUMAN	Hypothetical protein DKFZp667H197 (Fragment) RNA-binding protein 12 (RNA-binding motif protein 12) (SH3/WW domain anchor protein in the nucleus) (SWAN)	1	0.982	4	0.877
631	trm|Q86XC7|Q86XC7_HUMAN trm|Q5T576|Q5T576_HUMAN trm|Q5T578|Q5T578_HUMAN spt|O00410|IMB3_HUMAN	RAN binding protein 5 Karyopherin (Importin) beta 3 (Fragment) Karyopherin (Importin) beta 3 Importin beta-3 (Karyopherin beta-3) (Ran-binding protein 5) (RanBP5)	0		0
632	trm|Q5SQ09|Q5SQ09_HUMAN spt|P41222|PTGDS_HUMAN trm|Q5SQ11|Q5SQ11_HUMAN trm|Q5SQ12|Q5SQ12_HUMAN	Prostaglandin D2 synthase 21kDa (Brain) (Fragment) Prostaglandin-H2 D-isomerase precursor (EC 5.3.99.2) (Lipocalin-type prostaglandin-D synthase) (Glutathione-independent PGD synthetase) (Prostaglandin-D2 synthase) (PGD2 synthase) (PGDS2) (PGDS) (Beta-trace protein) (Cerebrin-28) Prostaglandin D2 synthase 21kDa (Brain) (Fragment) Prostaglandin D2 synthase 21kDa (Brain)	0		2	1.922
633	trm|Q59HA7|Q59HA7_HUMAN trm|Q9NQP5|Q9NQP5_HUMAN spt|P00488|F13A_HUMAN	Coagulation factor XIII A chain variant (Fragment) "Coagulation factor XIII, A1 polypeptide (Fragment) " Coagulation factor XIII A chain precursor (EC 2.3.2.13) (Coagulation factor XIIIa) (Protein-glutamine gamma-glutamyltransferase A chain) (Transglutaminase A chain)	0		0
634	trm|Q8N6D4|Q8N6D4_HUMAN trm|Q9UM02|Q9UM02_HUMAN spt|P48147|PPCE_HUMAN	Prolyl endopeptidase (Prolyl oligopeptidase) (EC 3.4.21.26) Prolyl endopeptidase (EC 3.4.21.26) (Prolyl oligopeptidase) Prolyl endopeptidase (EC 3.4.21.26) (Post-proline cleaving enzyme) (PE)	5	0.87	1	0.672
635	trm|Q8N6B4|Q8N6B4_HUMAN trm|Q4LE54|Q4LE54_HUMAN spt|Q13492|PICAL_HUMAN trm|Q6GMQ6|Q6GMQ6_HUMAN	Myeloid/lymphoid or mixed-lineage leukemia/clathrin assembly protein fusion protein (Fragment) PICALM variant protein (Fragment) Phosphatidylinositol-binding clathrin assembly protein (Clathrin assembly lymphoid myeloid leukemia protein) Phosphatidylinositol binding clathrin assembly protein	0		0
636	spt|Q5BKZ1|ZN326_HUMAN	Zinc finger protein 326	0		2	0.663
637	trm|Q8IZZ5|Q8IZZ5_HUMAN spt|P00748|FA12_HUMAN	Coagulation factor XII-Mie Coagulation factor XII precursor (EC 3.4.21.38) (Hageman factor) (HAF) [Contains: Coagulation factor XIIa heavy chain; Beta-factor XIIa part 1; Beta-factor XIIa part 2; Coagulation factor XIIa light chain]	0		0
638	spt|P62333|PRS10_HUMAN	26S protease regulatory subunit S10B (Proteasome subunit p42) (Proteasome 26S subunit ATPase 6)	4	1.106	2	1.025
639	spt|P53597|SUCA_HUMAN	Succinyl-CoA ligase [GDP-forming] subunit alpha, mitochondrial precursor (EC 6.2.1.4) (Succinyl-CoA synthetase subunit alpha) (SCS- alpha)	0		0
640	spt|Q9Y6W5|WASF2_HUMAN trm|Q8NBU0|Q8NBU0_HUMAN	Wiskott-Aldrich syndrome protein family member 2 (WASP-family protein member 2) (Protein WAVE-2) (Verprolin homology domain-containing protein 2) "CDNA FLJ90750 fis, clone PLACE2000118, weakly similar to WISKOTT- ALDRICH SYNDROME PROTEIN HOMOLOG "	1	1.147	2	1
641	spt|Q13564|ULA1_HUMAN	NEDD8-activating enzyme E1 regulatory subunit (Amyloid protein-binding protein 1) (Amyloid beta precursor protein-binding protein 1, 59 kDa) (APP-BP1) (Protooncogene protein 1) (HPP1)	0		0
642	spt|P47756|CAPZB_HUMAN trm|Q5TG66|Q5TG66_HUMAN trm|Q5VVZ9|Q5VVZ9_HUMAN trm|Q5VVZ5|Q5VVZ5_HUMAN trm|Q32Q68|Q32Q68_HUMAN trm|Q5VVZ8|Q5VVZ8_HUMAN trm|Q5VVZ6|Q5VVZ6_HUMAN	F-actin capping protein subunit beta (CapZ beta) "Capping protein (Actin filament) muscle Z-line, beta (Fragment) " "Capping protein (Actin filament) muscle Z-line, beta (Fragment) " "Capping protein (Actin filament) muscle Z-line, beta " "Capping protein (Actin filament) muscle Z-line, beta " "Capping protein (Actin filament) muscle Z-line, beta " "Capping protein (Actin filament) muscle Z-line,…	7	0.883	5	1.569	3.209	0.005
643	trm|Q8NBF2|Q8NBF2_HUMAN trm|Q8N5A6|Q8N5A6_HUMAN trm|Q8N1H1|Q8N1H1_HUMAN	CDNA FLJ33312 fis, clone BNGH42005968, weakly similar to DIPZ PROTEIN (Novel NHL repeat domain containing protein) NHLRC2 protein "CDNA FLJ25621 fis, clone STM02637 "	1	1.086	2	1.021
644	trm|Q8N723|Q8N723_HUMAN trm|Q8NFV4|Q8NFV4_HUMAN trm|Q9HBS8|Q9HBS8_HUMAN trm|Q6PJU0|Q6PJU0_HUMAN	Williams-Beuren Syndrome critical region protein 21 form D Williams-Beuren syndrome critical region protein 21 form A (Abhydrolase domain containing 11) Hypothetical protein (Hypothetical protein ABHD11) (Hypothetical protein WBSCR21) (WBSCR21 protein) ABHD11 protein (Fragment)	2	0.928	4	1.212
645	trm|Q6DHZ2|Q6DHZ2_HUMAN trm|Q9BUB1|Q9BUB1_HUMAN trm|Q75MP1|Q75MP1_HUMAN spt|P31323|KAP3_HUMAN spt|P13861|KAP2_HUMAN	Protein kinase, cAMP-dependent, regulatory, type II, beta (Hypothetical protein PRKAR2B) "PRKAR2A protein (Protein kinase, cAMP-dependent, regulatory, type II, alpha) " Hypothetical protein PRKAR2B (Fragment) cAMP-dependent protein kinase type II-beta regulatory subunit cAMP-dependent protein kinase type II-alpha regulatory subunit	1	0.96	4	1.233
646	spt|Q16666|IF16_HUMAN trm|Q8NEQ7|Q8NEQ7_HUMAN trm|Q59GX0|Q59GX0_HUMAN trm|Q5T3W7|Q5T3W7_HUMAN trm|Q5T3W8|Q5T3W8_HUMAN trm|Q96AJ5|Q96AJ5_HUMAN	Gamma-interferon-inducible protein Ifi-16 (Interferon-inducible myeloid differentiation transcriptional activator) (IFI 16) Interferon-inducible IFI 16 "Interferon, gamma-inducible protein 16 variant (Fragment) " "Interferon, gamma-inducible protein 16 (Fragment) " "Interferon, gamma-inducible protein 16 " "Interferon, gamma-inducible protein 16 "	1	1.019	2	0.94
647	spt|P53041|PPP5_HUMAN trm|Q53FR0|Q53FR0_HUMAN trm|Q9BPW0|Q9BPW0_HUMAN	Serine/threonine-protein phosphatase 5 (EC 3.1.3.16) (PP5) (Protein phosphatase T) (PP-T) (PPT) "Protein phosphatase 5, catalytic subunit variant (Fragment) " PPP5C protein (Fragment)	0		0
648	trm|Q6NZ52|Q6NZ52_HUMAN trm|Q9BQQ5|Q9BQQ5_HUMAN spt|P46776|RL27A_HUMAN	Ribosomal protein L27a Ribosomal protein L27a 60S ribosomal protein L27a	3	1.455	3	1.867	0.55	1
649	trm|Q59G98|Q59G98_HUMAN trm|Q49AS9|Q49AS9_HUMAN trm|Q59G49|Q59G49_HUMAN trm|O15187|O15187_HUMAN spt|Q01085|TIAR_HUMAN spt|P31483|TIA1_HUMAN trm|Q53SS9|Q53SS9_HUMAN trm|Q2TSD2|Q2TSD2_HUMAN	TIA1 protein variant (Fragment) TIAL1 protein TIA1 cytotoxic granule-associated RNA-binding protein-like 1 isoform 2 variant (Fragment) T-cluster binding protein Nucleolysin TIAR (TIA-1-related protein) Nucleolysin TIA-1 isoform p40 (RNA-binding protein TIA-1) (p40-TIA-1) [Contains: Nucleolysin TIA-1 isoform p15 (p15-TIA-1)] Hypothetical protein TIA1 Aging-associated gene 7 protein	0		1	1.202
650	spt|P06727|APOA4_HUMAN trm|Q13784|Q13784_HUMAN	Apolipoprotein A-IV precursor (Apo-AIV) (ApoA-IV) APOA4 protein (Fragment)	2	1.195	4	0.629
651	trm|Q96CT7|Q96CT7_HUMAN	Coiled-coil domain containing 124	1	0.875	3	1.502
652	trm|Q5UGI6|Q5UGI6_HUMAN spt|P05155|IC1_HUMAN	Serine/cysteine proteinase inhibitor clade G member 1 splice variant 2 (Fragment) Plasma protease C1 inhibitor precursor (C1 Inh) (C1Inh) (C1 esterase inhibitor) (C1-inhibiting factor)	5	0.868	7	0.645	-0.965	0.2
653	trm|Q5JWN5|Q5JWN5_HUMAN trm|Q96TD5|Q96TD5_HUMAN spt|P56537|IF6_HUMAN	Integrin beta 4 binding protein P27BBP protein Eukaryotic translation initiation factor 6 (eIF-6) (B4 integrin interactor) (CAB) (p27(BBP)) (B(2)GCN homolog)	0		0
654	spt|P27824|CALX_HUMAN trm|Q16094|Q16094_HUMAN	Calnexin precursor (Major histocompatibility complex class I antigen- binding protein p88) (p90) (IP90) Calnexin (Fragment)	1	1.159	2	0.975
655	trm|Q8N4N0|Q8N4N0_HUMAN spt|P25311|ZA2G_HUMAN trm|Q5XKQ4|Q5XKQ4_HUMAN	Alpha-2-glycoprotein 1, zinc Zinc-alpha-2-glycoprotein precursor (Zn-alpha-2-glycoprotein) (Zn- alpha-2-GP) "Alpha-2-glycoprotein 1, zinc "	4	1.263	2	0.531
656	trm|Q6NZ56|Q6NZ56_HUMAN trm|Q6IBH6|Q6IBH6_HUMAN spt|Q9UNX3|RL26L_HUMAN spt|P61254|RL26_HUMAN	Hypothetical protein RPL26 protein 60S ribosomal protein L26-like 1 60S ribosomal protein L26	0		2	2.662
657	trm|Q659F9|Q659F9_HUMAN spt|Q96FW1|OTUB1_HUMAN	Hypothetical protein DKFZp564E242 Ubiquitin thioesterase protein OTUB1 (EC 3.4.-.-) (Otubain-1) (OTU domain-containing ubiquitin aldehyde-binding protein 1) (Ubiquitin- specific-processing protease OTUB1) (Deubiquitinating enzyme OTUB1)	3	0.736	3	1.649	2.278	0.05
658	trm|Q53FV3|Q53FV3_HUMAN spt|Q9BT78|CSN4_HUMAN	COP9 signalosome subunit 4 variant (Fragment) COP9 signalosome complex subunit 4 (Signalosome subunit 4) (SGN4) (JAB1-containing signalosome subunit 4)	1	1.525	2	1.344
659	trm|Q53FC6|Q53FC6_HUMAN spt|O43681|ARSA1_HUMAN	ArsA arsenite transporter, ATP-binding, homolog 1 variant (Fragment) Arsenical pump-driving ATPase (EC 3.6.3.16) (Arsenite-translocating ATPase) (Arsenical resistance ATPase) (Arsenite-transporting ATPase) (ARSA) (ASNA-I)	0		2	3.342
660	spt|Q9Y295|DRG1_HUMAN	Developmentally-regulated GTP-binding protein 1 (DRG 1)	0		0
661	spt|P50479|PDLI4_HUMAN	PDZ and LIM domain protein 4 (LIM protein RIL) (Reversion-induced LIM protein)	3	1.249	1	7.132
662	spt|P50453|SPB9_HUMAN trm|Q6N0A8|Q6N0A8_HUMAN	Serpin B9 (Cytoplasmic antiproteinase 3) (CAP-3) (CAP3) (Protease inhibitor 9) Hypothetical protein DKFZp686O07189	2	1.179	4	0.921
663	spt|P22061|PIMT_HUMAN trm|Q5VYC2|Q5VYC2_HUMAN trm|Q5VYC1|Q5VYC1_HUMAN	Protein-L-isoaspartate(D-aspartate) O-methyltransferase (EC 2.1.1.77) (Protein-beta-aspartate methyltransferase) (PIMT) (Protein L- isoaspartyl/D-aspartyl methyltransferase) (L-isoaspartyl protein carboxyl methyltransferase) Protein-L-isoaspartate (D-aspartate) O-methyltransferase Protein-L-isoaspartate (D-aspartate) O-methyltransferase	3	0.935	6	1.043	1.272	0.15
664	spt|P08294|SODE_HUMAN	Extracellular superoxide dismutase [Cu-Zn] precursor (EC 1.15.1.1) (EC-SOD)	6	1.014	6	1.013	-0.003	1
665	spt|P02749|APOH_HUMAN	Beta-2-glycoprotein 1 precursor (Beta-2-glycoprotein I) (Apolipoprotein H) (Apo-H) (B2GPI) (Beta(2)GPI) (Activated protein C- binding protein) (APC inhibitor) (Anticardiolipin cofactor)	6	1.01	3	0.497	-3.774	0.005
666	spt|O00764|PDXK_HUMAN	Pyridoxal kinase (EC 2.7.1.35) (Pyridoxine kinase)	2	1.118	3	0.701
667	trm|Q75MH1|Q75MH1_HUMAN trm|Q5JNZ5|Q5JNZ5_HUMAN trm|Q76N57|Q76N57_HUMAN trm|Q5JVH5|Q5JVH5_HUMAN spt|P62854|RS26_HUMAN	Hypothetical protein RPS26 Ribosomal protein S26-like 1 Ribosomal protein S26 (Fragment) OTTHUMP00000018641 40S ribosomal protein S26	3	0.829	3	2.386	7.925	0.001
668	trm|Q6FGJ9|Q6FGJ9_HUMAN spt|P21266|GSTM3_HUMAN trm|Q59EJ5|Q59EJ5_HUMAN	GSTM3 protein (Glutathione S-transferase M3) (Brain) Glutathione S-transferase Mu 3 (EC 2.5.1.18) (GSTM3-3) (GST class-mu 3) (hGSTM3-3) Glutathione S-transferase M3 variant (Fragment)	0		2	1.884
669	trm|Q567R6|Q567R6_HUMAN spt|Q04837|SSB_HUMAN	Single-stranded DNA binding protein 1 "Single-stranded DNA-binding protein, mitochondrial precursor (Mt-SSB) (MtSSB) (PWP1-interacting protein 17) "	3	0.884	6	0.983	0.769	0.25
670	trm|Q53FP0|Q53FP0_HUMAN spt|Q9NVS9|PNPO_HUMAN	Pyridoxine 5'-phosphate oxidase variant (Fragment) Pyridoxine-5'-phosphate oxidase (EC 1.4.3.5) (Pyridoxamine-phosphate oxidase)	1	0.915	3	2.56
671	spt|Q9Y259|CHKB_HUMAN	Choline/ethanolamine kinase [Includes: Choline kinase beta (EC 2.7.1.32) (CK); Ethanolamine kinase (EC 2.7.1.82) (EK)]	0		0
672	spt|Q9H1E3|NUCKS_HUMAN trm|Q5PXE7|Q5PXE7_HUMAN	Nuclear ubiquitous casein and cyclin-dependent kinases substrate (P1) Nuclear ubiquitous casein kinase and cyclin-dependent kinase substrate variant	6	0.89	6	1.032	0.949	0.2
673	spt|P49720|PSB3_HUMAN	Proteasome subunit beta type 3 (EC 3.4.25.1) (Proteasome theta chain) (Proteasome chain 13) (Proteasome component C10-II)	2	0.69	3	2.419
674	spt|P43487|RANG_HUMAN trm|Q53EY3|Q53EY3_HUMAN trm|Q6IPB4|Q6IPB4_HUMAN	Ran-specific GTPase-activating protein (Ran-binding protein 1) (RanBP1) RAN binding protein 1 variant (Fragment) Hypothetical protein	0		2	1.124
675	spt|P12724|ECP_HUMAN	Eosinophil cationic protein precursor (EC 3.1.27.-) (ECP) (Ribonuclease 3) (RNase 3)	0		1	2.993
676	spt|P02747|C1QC_HUMAN	Complement C1q subcomponent subunit C precursor	1	3.394	2	1.05
677	trm|Q5T0S6|Q5T0S6_HUMAN spt|P50897|PPT1_HUMAN	Palmitoyl-protein thioesterase 1 (Ceroid-lipofuscinosis, neuronal 1, infantile) (Fragment) Palmitoyl-protein thioesterase 1 precursor (EC 3.1.2.22) (PPT-1) (Palmitoyl-protein hydrolase 1)	0		0
678	trm|Q53XY5|Q53XY5_HUMAN spt|P54578|UBP14_HUMAN	Ubiquitin specific protease 14 (TRNA-guanine transglycosylase) Ubiquitin carboxyl-terminal hydrolase 14 (EC 3.1.2.15) (Ubiquitin thioesterase 14) (Ubiquitin-specific-processing protease 14) (Deubiquitinating enzyme 14)	2	0.726	6	1.541
679	trm|Q0JTR5|Q0JTR5_HUMAN trm|Q5HYH5|Q5HYH5_HUMAN spt|O43809|CPSF5_HUMAN	Hypothetical protein NUDT21 (Fragment) Hypothetical protein DKFZp313O211 Cleavage and polyadenylation specificity factor 5 (Cleavage and polyadenylation specificity factor 25 kDa subunit) (CPSF 25 kDa subunit) (Pre-mRNA cleavage factor Im 25 kDa subunit) (Nucleoside diphosphate-linked moiety X motif 21) (Nudix motif 21)	0		0
680	trm|Q0JSY2|Q0JSY2_HUMAN spt|P49006|MRP_HUMAN	Hypothetical protein MARCKSL1 (Fragment) MARCKS-related protein (MARCKS-like protein 1) (Macrophage myristoylated alanine-rich C kinase substrate) (Mac-MARCKS) (MacMARCKS)	10	1.056	10	0.776	-2.955	0.005
681	spt|P00918|CAH2_HUMAN	Carbonic anhydrase 2 (EC 4.2.1.1) (Carbonic anhydrase II) (Carbonate dehydratase II) (CA-II) (Carbonic anhydrase C)	1	0.905	4	0.945
682	spt|O95394|AGM1_HUMAN	Phosphoacetylglucosamine mutase (EC 5.4.2.3) (PAGM) (Acetylglucosamine phosphomutase) (N-acetylglucosamine-phosphate mutase) (Phosphoglucomutase 3)	0		0
683	trm|Q96Q14|Q96Q14_HUMAN spt|P37108|SRP14_HUMAN	Signal recognition particle 14kD Signal recognition particle 14 kDa protein (SRP14) (18 kDa Alu RNA- binding protein)	3	0.769	3	1.836	6.469	0.002
684	trm|Q7Z3D1|Q7Z3D1_HUMAN trm|Q5T0P8|Q5T0P8_HUMAN spt|P62847|RS24_HUMAN	Hypothetical protein DKFZp686N1586 (Hypothetical protein RPS24) Ribosomal protein S24 40S ribosomal protein S24	2	1.172	1	2.329
685	trm|Q5T4L6|Q5T4L6_HUMAN spt|Q71UM5|RS27L_HUMAN spt|P42677|RS27_HUMAN	Ribosomal protein S27 (Metallopanstimulin 1) 40S ribosomal protein S27-like protein 40S ribosomal protein S27 (Metallopan-stimulin 1) (MPS-1)	1	1.555	2	1.39
686	trm|Q0JT63|Q0JT63_HUMAN spt|P99999|CYC_HUMAN	Hypothetical protein CYCS (Fragment) Cytochrome c	7	1.026	5	1.073	0.501	1
687	spt|Q9UHV9|PFD2_HUMAN	Prefoldin subunit 2	1	1.014	4	0.784
688	spt|Q16563|SYPL1_HUMAN	Synaptophysin-like protein 1 (Pantophysin)	0		1	3.995
689	spt|P68402|PA1B2_HUMAN	Platelet-activating factor acetylhydrolase IB subunit beta (EC 3.1.1.47) (PAF acetylhydrolase 30 kDa subunit) (PAF-AH 30 kDa subunit) (PAF-AH subunit beta) (PAFAH subunit beta)	6	0.952	3	1.175	1.825	0.1
690	spt|P61019|RAB2A_HUMAN	Ras-related protein Rab-2A	0		2	1.31
691	spt|P26885|FKBP2_HUMAN	FK506-binding protein 2 precursor (EC 5.2.1.8) (Peptidyl-prolyl cis- trans isomerase) (PPIase) (Rotamase) (13 kDa FKBP) (FKBP-13)	5	0.799	4	0.701	-0.91	0.2
692	spt|P09012|SNRPA_HUMAN	U1 small nuclear ribonucleoprotein A (U1 snRNP protein A) (U1A protein) (U1-A)	1	0.863	2	1.31
693	spt|P06314|KV4C_HUMAN spt|P06312|KV40_HUMAN spt|P01625|KV4A_HUMAN spt|P06313|KV4B_HUMAN	Ig kappa chain V-IV region B17 precursor Ig kappa chain V-IV region precursor (Fragment) Ig kappa chain V-IV region Len Ig kappa chain V-IV region JI precursor	8	1.033	7	0.697	-3.985	0.001
694	spt|P01591|IGJ_HUMAN	Immunoglobulin J chain	2	1.627	4	2.191
695	spt|O95630|STABP_HUMAN	STAM-binding protein (EC 3.1.2.15) (Associated molecule with the SH3 domain of STAM)	0		0
696	trm|Q9UDI2|Q9UDI2_HUMAN	Neutrophil cytosolic factor 3; NCF-3 (Fragments)	7	1.076	5	1.335	0.95	0.2
697	trm|Q6PG42|Q6PG42_HUMAN spt|O15511|ARPC5_HUMAN	Hypothetical protein (Actin related protein 2/3 complex, subunit 5, 16kDa) Actin-related protein 2/3 complex subunit 5 (ARP2/3 complex 16 kDa subunit) (p16-ARC)	8	0.992	7	1.031	0.408	1
698	spt|Q9Y333|LSM2_HUMAN	U6 snRNA-associated Sm-like protein LSm2 (snRNP core Sm-like protein Sm-x5) (Small nuclear ribonuclear protein D homolog) (Protein G7b)	2	1.082	3	0.843
699	spt|Q9UEE9|CFDP1_HUMAN	Craniofacial development protein 1 (Bucentaur)	0		2	0.994
700	spt|Q9NRV9|HEBP1_HUMAN	Heme-binding protein 1 (p22HBP)	0		1	0.685
701	spt|Q15843|NEDD8_HUMAN	NEDD8 precursor (Ubiquitin-like protein Nedd8) (Neddylin)	8	0.738	7	0.928	1.02	0.2
702	spt|P62857|RS28_HUMAN	40S ribosomal protein S28	8	0.999	7	1.299	2.146	0.05
703	spt|P05109|S10A8_HUMAN	Protein S100-A8 (S100 calcium-binding protein A8) (Calgranulin-A) (Migration inhibitory factor-related protein 8) (MRP-8) (Cystic fibrosis antigen) (CFAG) (P8) (Leukocyte L1 complex light chain) (Calprotectin L1L subunit) (Urinary stone protein band A)	3	2.496	3	6.52	1.321	0.15
704	spt|O15212|PFD6_HUMAN	Prefoldin subunit 6 (Protein Ke2)	0		2	1.09
705	trm|Q6W3F3|Q6W3F3_HUMAN trm|Q53HB7|Q53HB7_HUMAN spt|Q9NR28|DBLOH_HUMAN trm|Q502X2|Q502X2_HUMAN	SMAC3 Diablo isoform 1 variant (Fragment) "Diablo homolog, mitochondrial precursor (Second mitochondria-derived activator of caspase) (Smac protein) (Direct IAP-binding protein with low pI) " Diablo homolog (Drosophila)	3	1.086	6	1.066	-0.188	1
706	trm|Q4ZG77|Q4ZG77_HUMAN spt|O00487|PSDE_HUMAN	Hypothetical protein PSMD14 (Fragment) 26S proteasome non-ATPase regulatory subunit 14 (26S proteasome regulatory subunit rpn11) (26S proteasome-associated PAD1 homolog 1)	3	0.926	3	0.762	-2.09	0.1
707	spt|Q9UBQ5|IF3C_HUMAN	Eukaryotic translation initiation factor 3 subunit 12 (eIF-3 p25) (eIF-3 p28) (eIF3k) (Muscle-specific gene M9 protein) (ARG134) (PLAC- 24)	0		2	2.334
708	spt|P63167|DYL1_HUMAN	Dynein light chain 1, cytoplasmic (Dynein light chain LC8-type 1) (8 kDa dynein light chain) (DLC8) (Protein inhibitor of neuronal nitric oxide synthase) (PIN)	1	1.145	2	1.398
709	spt|O60888|CUTA_HUMAN	Protein CutA precursor (Brain acetylcholinesterase putative membrane anchor) (Acetylcholinesterase-associated protein)	6	1.039	3	0.809	-1.563	0.1
710	trm|Q2NKL4|Q2NKL4_HUMAN spt|O14974|MYPT1_HUMAN	PPP1R12A protein Protein phosphatase 1 regulatory subunit 12A (Myosin phosphatase- targeting subunit 1) (Myosin phosphatase target subunit 1) (Protein phosphatase myosin-binding subunit)	1	0.771	2	0.922
711	trm|Q6AI32|Q6AI32_HUMAN trm|Q53HS8|Q53HS8_HUMAN spt|P06865|HEXA_HUMAN	Hypothetical protein DKFZp781C13106 Hexosaminidase A preproprotein variant (Fragment) Beta-hexosaminidase alpha chain precursor (EC 3.2.1.52) (N-acetyl- beta-glucosaminidase) (Beta-N-acetylhexosaminidase) (Hexosaminidase A)	0		2	1.046
712	spt|P01833|PIGR_HUMAN	Polymeric-immunoglobulin receptor precursor (Poly-Ig receptor) (PIGR) (Hepatocellular carcinoma-associated protein TB6) [Contains: Secretory component]	4	0.988	9	1.202	0.371	1
713	trm|Q53HV2|Q53HV2_HUMAN spt|Q99832|TCPH_HUMAN	Chaperonin containing TCP1, subunit 7 (Eta) variant (Fragment) T-complex protein 1 subunit eta (TCP-1-eta) (CCT-eta) (HIV-1 Nef- interacting protein)	7	0.947	5	1.589	2.588	0.025
714	trm|Q0P6K2|Q0P6K2_HUMAN spt|Q16851|UGPA2_HUMAN spt|Q07131|UGPA1_HUMAN	UDP-glucose pyrophosphorylase 2 UTP--glucose-1-phosphate uridylyltransferase 2 (EC 2.7.7.9) (UDP- glucose pyrophosphorylase 2) (UDPGP 2) (UGPase 2) UTP--glucose-1-phosphate uridylyltransferase 1 (EC 2.7.7.9) (UDP- glucose pyrophosphorylase 1) (UDPGP 1) (UGPase 1)	0		2	2.6
715	spt|Q9Y5L4|TIM13_HUMAN	Mitochondrial import inner membrane translocase subunit Tim13	0		0
716	trm|Q6NSA3|Q6NSA3_HUMAN trm|Q6FHN1|Q6FHN1_HUMAN spt|P33316|DUT_HUMAN	DUTP pyrophosphatase DUT protein "Deoxyuridine 5'-triphosphate nucleotidohydrolase, mitochondrial precursor (EC 3.6.1.23) (dUTPase) (dUTP pyrophosphatase) "	1	1.485	2	1.559
717	spt|Q02218|ODO1_HUMAN trm|Q9UDX0|Q9UDX0_HUMAN	2-oxoglutarate dehydrogenase E1 component, mitochondrial precursor (EC 1.2.4.2) (Alpha-ketoglutarate dehydrogenase) Oxoglutarate (Alpha-ketoglutarate) dehydrogenase (Lipoamide) (Hypothetical protein OGDH)	0		0
718	trm|Q5TBM7|Q5TBM7_HUMAN spt|Q92598|HS105_HUMAN	Heat shock 105kDa protein 1 Heat-shock protein 105 kDa (Heat shock 110 kDa protein) (Antigen NY- CO-25)	2	0.779	4	0.974
719	spt|Q16836|HCDH_HUMAN	Short chain 3-hydroxyacyl-CoA dehydrogenase, mitochondrial precursor (EC 1.1.1.35) (HCDH) (Medium and short chain L-3-hydroxyacyl-coenzyme A dehydrogenase)	2	0.716	1	1.399
720	trm|Q53XY7|Q53XY7_HUMAN spt|P50238|CRIP1_HUMAN	Cysteine-rich protein 1 (Intestinal) Cysteine-rich protein 1 (Cysteine-rich intestinal protein) (CRIP) (Cysteine-rich heart protein) (hCRHP)	5	0.736	4	1.518	3.517	0.005
721	trm|Q7L1Q6|Q7L1Q6_HUMAN trm|Q15394|Q15394_HUMAN trm|Q53FN7|Q53FN7_HUMAN	BZW1 protein (Hypothetical protein BZW1) KIAA0005 protein (Fragment) BZW1 protein variant (Fragment)	0		0
722	trm|Q5JUZ8|Q5JUZ8_HUMAN	Programmed cell death 8 (Apoptosis-inducing factor)	1	0.703	2	0.644
723	trm|Q5VSR7|Q5VSR7_HUMAN	Phosphofructokinase, platelet	0		1	3.371
724	trm|Q9NSK3|Q9NSK3_HUMAN spt|Q9BR76|COR1B_HUMAN	Hypothetical protein DKFZp762I166 (Fragment) Coronin-1B (Coronin-2)	3	1.033	7	1.284	1.474	0.1
725	spt|P30049|ATPD_HUMAN	ATP synthase delta chain, mitochondrial precursor (EC 3.6.3.14)	8	0.959	8	0.856	-0.839	0.25
726	spt|Q9C0C2|TB182_HUMAN	182 kDa tankyrase 1-binding protein	0		0
727	spt|P07686|HEXB_HUMAN trm|Q5URX0|Q5URX0_HUMAN	Beta-hexosaminidase beta chain precursor (EC 3.2.1.52) (N-acetyl-beta- glucosaminidase) (Beta-N-acetylhexosaminidase) (Hexosaminidase B) (Cervical cancer proto-oncogene 7) (HCC-7) [Contains: Beta- hexosaminidase beta-B chain; Beta-hexosaminidase beta-A chain] ENC-1AS	1	1.119	2	0.979
728	spt|P53618|COPB_HUMAN	Coatomer subunit beta (Beta-coat protein) (Beta-COP)	2	0.931	1	1.272
729	spt|P31949|S10AB_HUMAN	Protein S100-A11 (S100 calcium-binding protein A11) (Protein S100C) (Calgizzarin) (MLN 70)	4	0.744	6	1.333	1.615	0.1
730	trm|Q6U8A4|Q6U8A4_HUMAN spt|Q93009|UBP7_HUMAN	Ubiquitin-specific protease 7 isoform (Fragment) Ubiquitin carboxyl-terminal hydrolase 7 (EC 3.1.2.15) (Ubiquitin thioesterase 7) (Ubiquitin-specific-processing protease 7) (Deubiquitinating enzyme 7) (Herpesvirus-associated ubiquitin-specific protease)	0		0
731	trm|Q6NVC0|Q6NVC0_HUMAN	SLC25A5 protein (Fragment)	0		0
732	spt|Q9Y256|FACE2_HUMAN	CAAX prenyl protease 2 (EC 3.4.22.-) (Prenyl protein-specific endoprotease 2) (Farnesylated proteins-converting enzyme 2) (FACE-2) (hRCE1)	0		0
733	trm|Q6IAH0|Q6IAH0_HUMAN spt|P62310|LSM3_HUMAN	LSM3 protein U6 snRNA-associated Sm-like protein LSm3	4	0.922	5	1.409	2.255	0.05
734	trm|Q53GW1|Q53GW1_HUMAN spt|Q8WVM8|SCFD1_HUMAN	Vesicle transport-related protein isoform a variant (Fragment) Sec1 family domain-containing protein 1 (Syntaxin-binding protein 1- like 2) (Sly1p)	1	1.072	2	0.921
735	spt|Q9NRH3|TBG2_HUMAN spt|P23258|TBG1_HUMAN	Tubulin gamma-2 chain (Gamma-2 tubulin) Tubulin gamma-1 chain (Gamma-1 tubulin) (Gamma-tubulin complex component 1) (GCP-1)	1	1.361	2	2.075
736	spt|Q13045|FLII_HUMAN trm|Q59H95|Q59H95_HUMAN	Protein flightless-1 homolog Flightless I homolog variant (Fragment)	0		0
737	spt|P39748|FEN1_HUMAN	Flap endonuclease 1 (EC 3.1.-.-) (Flap structure-specific endonuclease 1) (FEN-1) (Maturation factor 1) (MF1) (hFEN-1) (DNase IV)	0		0
738	spt|P51148|RAB5C_HUMAN	Ras-related protein Rab-5C (RAB5L) (L1880)	2	0.858	1	1.125
740	trm|Q14TF0|Q14TF0_HUMAN spt|P48506|GSH1_HUMAN	Glutamate-cysteine ligase Glutamate--cysteine ligase catalytic subunit (EC 6.3.2.2) (Gamma- glutamylcysteine synthetase) (Gamma-ECS) (GCS heavy chain)	1	1.002	2	0.645
741	spt|Q99873|ANM1_HUMAN trm|Q5U8W9|Q5U8W9_HUMAN trm|Q8WUW5|Q8WUW5_HUMAN trm|Q2VP93|Q2VP93_HUMAN trm|Q6LEU5|Q6LEU5_HUMAN	Protein arginine N-methyltransferase 1 (EC 2.1.1.-) (Interferon receptor 1-bound protein 4) Protein arginine methyltransferase 1 isoform 4 PRMT1 protein (Fragment) PRMT1 protein (Fragment) HRMT1L2 protein (Fragment)	3	0.706	3	1.642	3.351	0.025
742	spt|P30626|SORCN_HUMAN	Sorcin (22 kDa protein) (CP-22) (V19)	2	1.62	4	1.129
743	trm|Q53QE6|Q53QE6_HUMAN spt|Q06210|GFPT1_HUMAN	Hypothetical protein GFPT1 Glucosamine--fructose-6-phosphate aminotransferase [isomerizing] 1 (EC 2.6.1.16) (Hexosephosphate aminotransferase 1) (D-fructose-6- phosphate amidotransferase 1) (GFAT 1) (GFAT1)	1	1.336	2	1.44
744	trm|Q7Z2L7|Q7Z2L7_HUMAN	Dodecenoyl-Coenzyme A delta isomerase (3,2 trans-enoyl-Coenzyme A isomerase)	0		0
745	spt|P31942|HNRH3_HUMAN trm|Q53F48|Q53F48_HUMAN	Heterogeneous nuclear ribonucleoprotein H3 (hnRNP H3) (hnRNP 2H9) Heterogeneous nuclear ribonucleoprotein H3 isoform a variant (Fragment)	3	0.923	3	1.283	0.945	0.2
746	trm|Q59FP9|Q59FP9_HUMAN spt|P29590|PML_HUMAN	Promyelocytic leukemia protein isoform 1 variant (Fragment) Probable transcription factor PML (Tripartite motif-containing protein 19) (RING finger protein 71)	1	0.833	2	1.037
747	spt|Q9UKV3|ACINU_HUMAN trm|Q69YJ6|Q69YJ6_HUMAN	Apoptotic chromatin condensation inducer in the nucleus (Acinus) Hypothetical protein DKFZp667N107 (Fragment)	0		0
749	spt|P53365|ARFP2_HUMAN	Arfaptin-2 (ADP-ribosylation factor-interacting protein 2) (Partner of RAC1) (Protein POR1)	1	1.177	2	0.876
751	trm|Q6FHV6|Q6FHV6_HUMAN spt|P09104|ENOG_HUMAN	Enolase (EC 4.2.1.11) (2-phospho-D-glycerate hydro-lyase) Gamma-enolase (EC 4.2.1.11) (2-phospho-D-glycerate hydro-lyase) (Neural enolase) (Neuron-specific enolase) (NSE) (Enolase 2)	3	0.644	0
752	spt|P62140|PP1B_HUMAN	Serine/threonine-protein phosphatase PP1-beta catalytic subunit (EC 3.1.3.16) (PP-1B)	5	0.898	4	0.93	0.363	1
753	trm|Q9BTT2|Q9BTT2_HUMAN trm|Q7Z4H3|Q7Z4H3_HUMAN trm|Q6NZ49|Q6NZ49_HUMAN trm|Q5TDQ4|Q5TDQ4_HUMAN trm|Q9Y3D1|Q9Y3D1_HUMAN	HDDC2 protein (Fragment) NS5ATP2 HDDC2 protein Chromosome 6 open reading frame 74 CGI-130 protein	0		0
754	trm|Q6MZZ3|Q6MZZ3_HUMAN spt|Q14203|DYNA_HUMAN trm|Q6IQ37|Q6IQ37_HUMAN	Hypothetical protein DKFZp686I0746 Dynactin-1 (150 kDa dynein-associated polypeptide) (DP-150) (DAP-150) (p150-glued) (p135) DCTN1 protein	0		0
755	trm|Q6DV89|Q6DV89_HUMAN	Tropomyosin alpha striated muscle isoform	5	0.965	4	1.107	0.42	1
756	spt|Q9H936|GHC1_HUMAN	Mitochondrial glutamate carrier 1 (GC-1) (Glutamate/H(+) symporter 1) (Solute carrier family 25 member 22)	0		0
757	spt|P98160|PGBM_HUMAN trm|Q5VU27|Q5VU27_HUMAN	Basement membrane-specific heparan sulfate proteoglycan core protein precursor (HSPG) (Perlecan) (PLC) Heparan sulfate proteoglycan 2 (Perlecan)	0		0
758	trm|Q75M87|Q75M87_HUMAN trm|Q75M86|Q75M86_HUMAN trm|Q75M85|Q75M85_HUMAN spt|P78347|GTF2I_HUMAN trm|Q86U51|Q86U51_HUMAN trm|Q499G6|Q499G6_HUMAN	Hypothetical protein GTF2I Hypothetical protein GTF2I Hypothetical protein GTF2I General transcription factor II-I (GTFII-I) (TFII-I) (Bruton tyrosine kinase-associated protein 135) (BTK-associated protein 135) (BAP-135) (SRF-Phox1-interacting protein) (SPIN) (Williams-Beuren syndrome chromosome region 6 protein) "General transcription factor II, i (Hypothetical protein GTF2I) " "General transcri…	0		2	1.059
759	trm|Q2VIR3|Q2VIR3_HUMAN trm|Q53HK3|Q53HK3_HUMAN spt|P41091|IF2G_HUMAN	EFI-2-gamma (Fragment) "Eukaryotic translation initiation factor 2, subunit 3 gamma, 52kDa variant (Fragment) " Eukaryotic translation initiation factor 2 subunit 3 (Eukaryotic translation initiation factor 2 subunit gamma) (eIF-2-gamma)	0		0
760	spt|P02786|TFR1_HUMAN	Transferrin receptor protein 1 (TfR1) (TR) (TfR) (Trfr) (CD71 antigen) (T9) (p90)	0		0
761	spt|P61204|ARF3_HUMAN trm|Q0JSC6|Q0JSC6_HUMAN spt|P84077|ARF1_HUMAN	ADP-ribosylation factor 3 Hypothetical protein ARF1 ADP-ribosylation factor 1	0		0
762	spt|O60216|RAD21_HUMAN	Double-strand-break repair protein rad21 homolog (hHR21) (Nuclear matrix protein 1) (NXP-1) (SCC1 homolog)	0		0
763	spt|P63261|ACTG_HUMAN	Actin, cytoplasmic 2 (Gamma-actin)	5	0.815	4	1.18	2.133	0.05
764	trm|Q6FH51|Q6FH51_HUMAN trm|Q96DH0|Q96DH0_HUMAN spt|P31947|1433S_HUMAN	SFN protein SFN protein 14-3-3 protein sigma (Stratifin) (Epithelial cell marker protein 1)	3	0.962	6	2.19	3.055	0.01
765	spt|Q9H444|CHM4B_HUMAN	Charged multivesicular body protein 4b (Chromatin-modifying protein 4b) (CHMP4b) (Vacuolar protein sorting 7-2) (SNF7-2) (hSnf7-2) (SNF7 homolog associated with Alix 1) (hVps32)	1	0.82	2	0.787
766	spt|P15586|GL6S_HUMAN	N-acetylglucosamine-6-sulfatase precursor (EC 3.1.6.14) (G6S) (Glucosamine-6-sulfatase)	2	1.17	4	1.125
767	spt|P52758|UK114_HUMAN	Ribonuclease UK114 (EC 3.1.-.-) (14.5 kDa translational inhibitor protein) (p14.5) (UK114 antigen homolog)	0		0
768	spt|P09237|MMP7_HUMAN	Matrilysin precursor (EC 3.4.24.23) (Pump-1 protease) (Uterine metalloproteinase) (Matrix metalloproteinase-7) (MMP-7) (Matrin)	0		0
769	spt|Q9Y3C8|UFC1_HUMAN	Ufm1-conjugating enzyme 1 (Ubiquitin-fold modifier-conjugating enzyme 1)	0		0
770	trm|Q5TZP7|Q5TZP7_HUMAN spt|P27695|APEX1_HUMAN	APEX nuclease (Multifunctional DNA repair enzyme) 1 (Full-length cDNA clone CS0DI036YP02 of Placenta of Homo sapiens) (human) DNA-(apurinic or apyrimidinic site) lyase (EC 4.2.99.18) (AP endonuclease 1) (APEX nuclease) (APEN) (REF-1 protein)	8	1.082	7	0.934	-1.367	0.1
771	spt|Q9BSJ8|FA62A_HUMAN	Protein FAM62A (Membrane-bound C2 domain-containing protein)	0		0
773	spt|P05023|AT1A1_HUMAN	Sodium/potassium-transporting ATPase alpha-1 chain precursor (EC 3.6.3.9) (Sodium pump 1) (Na+/K+ ATPase 1)	1	1.08	2	1.191
775	spt|P49721|PSB2_HUMAN	Proteasome subunit beta type 2 (EC 3.4.25.1) (Proteasome component C7- I) (Macropain subunit C7-I) (Multicatalytic endopeptidase complex subunit C7-I)	5	0.882	4	1.042	0.835	0.25
776	spt|Q7L2E3|DHX30_HUMAN	Putative ATP-dependent RNA helicase DHX30 (EC 3.6.1.-) (DEAH box protein 30)	3	1.006	0
777	trm|Q6NTI8|Q6NTI8_HUMAN spt|Q15393|SF3B3_HUMAN	Splicing factor 3b, subunit 3, 130kDa Splicing factor 3B subunit 3 (Spliceosome-associated protein 130) (SAP 130) (SF3b130) (Pre-mRNA-splicing factor SF3b 130 kDa subunit) (STAF130)	0		2	1.248
778	spt|Q96HC4|PDLI5_HUMAN trm|Q5UW38|Q5UW38_HUMAN trm|Q0JTH8|Q0JTH8_HUMAN trm|Q0JT92|Q0JT92_HUMAN trm|Q0JS26|Q0JS26_HUMAN trm|Q4W5K9|Q4W5K9_HUMAN	PDZ and LIM domain protein 5 (Enigma homolog) (Enigma-like PDZ and LIM domains protein) L9 Hypothetical protein PDLIM5 (Fragment) Hypothetical protein PDLIM5 (Fragment) Hypothetical protein PDLIM5 (Fragment) Hypothetical protein LIM (Fragment)	3	1.159	0
779	trm|Q5J8M4|Q5J8M4_HUMAN spt|P78406|RAE1L_HUMAN	Migration-inducing gene 14 mRNA-associated protein mrnp 41 (Rae1 protein homolog)	0		0
780	trm|Q496I0|Q496I0_HUMAN spt|P14406|CX7A2_HUMAN	Cytochrome c oxidase subunit VIIa polypeptide 2 (Liver) "Cytochrome c oxidase polypeptide VIIa-liver/heart, mitochondrial precursor (EC 1.9.3.1) (Cytochrome c oxidase subunit VIIa-L) (VIIaL) "	1	0.797	2	1.068
781	spt|Q13085|COA1_HUMAN trm|Q6XDA8|Q6XDA8_HUMAN trm|Q7Z561|Q7Z561_HUMAN	Acetyl-CoA carboxylase 1 (EC 6.4.1.2) (ACC-alpha) [Includes: Biotin carboxylase (EC 6.3.4.14)] Acetyl-CoA carboxylase alpha Acetyl-CoA carboxylase 1	0		0
782	spt|Q9Y5F9|PCDGI_HUMAN	Protocadherin gamma B6 precursor (PCDH-gamma-B6)	1	0.862	2	0.604
783	spt|Q8WZ42|TITIN_HUMAN	Titin (EC 2.7.11.1) (Connectin) (Rhabdomyosarcoma antigen MU-RMS- 40.14)	2	0.926	4	0.966
784	spt|O43491|E41L2_HUMAN	Band 4.1-like protein 2 (Generally expressed protein 4.1) (4.1G)	5	1.006	2	2.491
786	spt|Q13813|SPTA2_HUMAN	Spectrin alpha chain, brain (Spectrin, non-erythroid alpha chain) (Alpha-II spectrin) (Fodrin alpha chain)	7	1.051	5	1.15	0.78	0.25
787	spt|Q14152|IF3A_HUMAN	Eukaryotic translation initiation factor 3 subunit 10 (eIF-3 theta) (eIF3 p167) (eIF3 p180) (eIF3 p185) (eIF3a)	0		0
788	spt|Q9Y2W1|TR150_HUMAN trm|Q7Z5U1|Q7Z5U1_HUMAN trm|Q6PJV4|Q6PJV4_HUMAN trm|Q6P0P7|Q6P0P7_HUMAN	Thyroid hormone receptor-associated protein 3 (Thyroid hormone receptor-associated protein complex 150 kDa component) (Trap150) THRAP3 protein (Fragment) THRAP3 protein (Fragment) THRAP3 protein (Fragment)	1	1.117	2	1.277
789	spt|Q14019|COTL1_HUMAN	Coactosin-like protein	5	0.901	4	0.999	1.017	0.2
790	spt|P30042|ES1_HUMAN	ES1 protein homolog, mitochondrial precursor (Protein KNP-I) (Protein GT335)	6	1.003	6	0.94	-0.868	0.25
791	trm|Q5JYR6|Q5JYR6_HUMAN trm|Q5JYR4|Q5JYR4_HUMAN trm|Q5JYR7|Q5JYR7_HUMAN spt|P04844|RIB2_HUMAN	OTTHUMP00000030902 OTTHUMP00000030903 (Fragment) OTTHUMP00000030901 (Fragment) Dolichyl-diphosphooligosaccharide--protein glycosyltransferase 63 kDa subunit precursor (EC 2.4.1.119) (Ribophorin II) (RPN-II) (RIBIIR)	0		1	2.228
792	trm|Q53HV6|Q53HV6_HUMAN	Niemann-Pick disease, type C2 variant (Fragment)	1	0.953	2	1.197
793	spt|Q9BXM0|PRAX_HUMAN	Periaxin	1	1.11	2	0.358
794	spt|P12955|PEPD_HUMAN	Xaa-Pro dipeptidase (EC 3.4.13.9) (X-Pro dipeptidase) (Proline dipeptidase) (Prolidase) (Imidodipeptidase)	1	0.743	2	0.771
795	trm|Q86VM9|Q86VM9_HUMAN trm|Q96DG4|Q96DG4_HUMAN	Conserved nuclear protein NHN1 LOC124245 protein (Fragment)	1	0.729	2	0.756
796	spt|Q9NYU2|UGGG1_HUMAN	UDP-glucose:glycoprotein glucosyltransferase 1 precursor (EC 2.4.1.-) (UDP-glucose ceramide glucosyltransferase-like 1) (UDP-- Glc:glycoprotein glucosyltransferase) (HUGT1)	0		2	0.945
797	spt|Q12874|SF3A3_HUMAN trm|Q53HM6|Q53HM6_HUMAN	Splicing factor 3A subunit 3 (Spliceosome-associated protein 61) (SAP 61) (SF3a60) "Splicing factor 3a, subunit 3 variant (Fragment) "	1	0.801	4	1.195
798	spt|P28331|NDUS1_HUMAN	NADH-ubiquinone oxidoreductase 75 kDa subunit, mitochondrial precursor (EC 1.6.5.3) (EC 1.6.99.3) (Complex I-75kD) (CI-75kD)	4	0.969	2	0.743
799	trm|Q6I9U9|Q6I9U9_HUMAN spt|Q99538|LGMN_HUMAN	LGMN protein "Legumain precursor (EC 3.4.22.34) (Asparaginyl endopeptidase) (Protease, cysteine 1) "	1	3.245	2	2.095
800	spt|Q9NYV4|CD2L7_HUMAN	Cell division cycle 2-related protein kinase 7 (EC 2.7.11.22) (CDC2- related protein kinase 7) (Cdc2-related kinase, arginine/serine-rich) (CrkRS)	0		0
801	trm|Q8TA92|Q8TA92_HUMAN spt|Q9Y4W6|AFG32_HUMAN trm|Q6P1L0|Q6P1L0_HUMAN	Similar to AFG3 ATPase family gene 3-like 2 (Yeast) (Fragment) AFG3-like protein 2 (EC 3.4.24.-) (Paraplegin-like protein) AFG3 ATPase family gene 3-like 2 (Yeast)	0		2	2.129
10 109	trm|O95036|O95036_HUMAN	WUGSC:H_RG054D04.1 protein	1	1.003	2	1.382
10 114	trm|Q2VIK8|Q2VIK8_HUMAN	RcNSEP1 (Fragment)	0		1	0.075
10 119	spt|P55884|IF39_HUMAN trm|Q86UM1|Q86UM1_HUMAN	Eukaryotic translation initiation factor 3 subunit 9 (eIF-3 eta) (eIF3 p116) (eIF3 p110) (eIF3b) (Prt1 homolog) (hPrt1) Hypothetical protein EIF3S9 (Fragment)	0		2	1.356
10 134	spt|P16157|ANK1_HUMAN	Ankyrin-1 (Erythrocyte ankyrin) (Ankyrin-R)	1	1.031	2	0.954
10 136	trm|Q53FC7|Q53FC7_HUMAN	Heat shock 70kDa protein 6 (HSP70B') variant (Fragment)	0		0
10 140	trm|Q7Z363|Q7Z363_HUMAN trm|Q6ZMX7|Q6ZMX7_HUMAN trm|Q8NCM8|Q8NCM8_HUMAN	Hypothetical protein DKFZp686E2195 (Fragment) "CDNA FLJ16607 fis, clone TESTI4010382, highly similar to Rattus norvegicus dynein, cytoplasmic, heavy chain 2 (Dnch2) " KIAA1997 protein (Fragment)	0		0
10 144	trm|Q9UQ39|Q9UQ39_HUMAN	RNA binding protein (Fragment)	0		0
10 146	trm|Q8N4B5|Q8N4B5_HUMAN	Hypothetical protein MGC35308	1	1.213	2	1.289
10 147	spt|P33240|CSTF2_HUMAN	Cleavage stimulation factor 64 kDa subunit (CSTF 64 kDa subunit) (CF-1 64 kDa subunit) (CstF-64)	0		0
10 149	spt|Q9NYL2|MLTK_HUMAN	Mitogen-activated protein kinase kinase kinase MLT (EC 2.7.11.25) (MLK-like mitogen-activated protein triple kinase) (Leucine zipper- and sterile alpha motif-containing kinase) (Sterile alpha motif- and leucine zipper-containing kinase AZK) (Mixed lineage kinase-related kinase) (MLK-related kinase) (MRK) (Cervical cancer suppressor gene 4 protein)	1	0.692	2	0.732
10 153	trm|Q9BVH8|Q9BVH8_HUMAN	Hypothetical protein (Fragment)	1	0.823	2	1.184
10 156	spt|Q5TZA2|CROCC_HUMAN	Rootletin (Ciliary rootlet coiled-coil protein)	2	0.752	4	1.091
10 24	trm|Q6P6C4|Q6P6C4_HUMAN	Hypothetical protein	1	1.438	2	0.507
10 36	spt|P04350|TBB4_HUMAN	Tubulin beta-4 chain (Tubulin 5 beta)	4	1.078	2	1.186
10 49	trm|Q5RKT7|Q5RKT7_HUMAN	Ribosomal protein S27a	4	1.267	2	0.85
11 100	spt|Q9H2U1|DHX36_HUMAN	Probable ATP-dependent RNA helicase DHX36 (EC 3.6.1.-) (DEAH box protein 36) (MLE-like protein 1) (RNA helicase associated with AU-rich element ARE)	1	0.403	2	0.388
11 132	trm|Q9BRL6|Q9BRL6_HUMAN trm|Q96TA3|Q96TA3_HUMAN	SRp46 splicing factor SRp46 splicing factor (Fragment)	1	0.92	2	1.453
11 139	spt|Q16720|AT2B3_HUMAN	Plasma membrane calcium-transporting ATPase 3 (EC 3.6.3.8) (PMCA3) (Plasma membrane calcium pump isoform 3) (Plasma membrane calcium ATPase isoform 3)	0		0
11 143	trm|Q8NEC5|Q8NEC5_HUMAN trm|Q96P76|Q96P76_HUMAN	Cation channel, sperm associated 1 "Sperm ion channel (Cation channel, sperm associated 1) "	1	1.073	2	0.66
11 146	spt|Q7Z4W1|DCXR_HUMAN	L-xylulose reductase (EC 1.1.1.10) (XR) (Dicarbonyl/L-xylulose reductase) (Kidney dicarbonyl reductase) (kiDCR) (Carbonyl reductase II) (Sperm surface protein P34H)	1	1.259	2	1.19
11 155	spt|P22087|FBRL_HUMAN	rRNA 2'-O-methyltransferase fibrillarin (EC 2.1.1.-) (34 kDa nucleolar scleroderma antigen)	0		2	2.749
11 157	spt|Q86X52|CHSS1_HUMAN	Chondroitin sulfate synthase 1 (EC 2.4.1.175) (Glucuronosyl-N- acetylgalactosaminyl-proteoglycan 4-beta-N- acetylgalactosaminyltransferase 1) (Chondroitin sulfate synthase 1) (N-acetylgalactosaminyl-proteoglycan 3-beta-glucuronosyltransferase 1) (EC 2.4.1.226) (Chondroitin glucuronyltransferase II) (N- acetylgalactosaminyltransferase II)	1	1.002	2	1.023
11 17	trm|Q6MZU6|Q6MZU6_HUMAN	Hypothetical protein DKFZp686C15213	1	1.214	2	0.486
11 61	trm|Q53H23|Q53H23_HUMAN trm|Q6GU03|Q6GU03_HUMAN spt|P38646|GRP75_HUMAN	Heat shock 70kDa protein 9B variant (Fragment) Heat shock 70kDa protein 9B (Mortalin-2) "Stress-70 protein, mitochondrial precursor (75 kDa glucose-regulated protein) (GRP 75) (Peptide-binding protein 74) (PBP74) (Mortalin) (MOT) "	7	0.925	4	0.956	0.194	1
11 64	trm|Q4G0Z0|Q4G0Z0_HUMAN	Hypothetical protein (Fragment)	1	1.033	2	1.023
11 81	spt|P54753|EPHB3_HUMAN	Ephrin type-B receptor 3 precursor (EC 2.7.10.1) (Tyrosine-protein kinase receptor HEK-2)	1	1.023	2	1.255
11 88	spt|Q8IUE6|H2A2B_HUMAN spt|Q96QV6|H2A1A_HUMAN	Histone H2A type 2-B Histone H2A type 1-A	4	1.077	2	1.331
11 91	trm|Q86Y04|Q86Y04_HUMAN trm|Q6ZUW9|Q6ZUW9_HUMAN	MAP4 protein (Fragment) "CDNA FLJ43255 fis, clone HEART2010495, moderately similar to MICROTUBULE-ASSOCIATED PROTEIN 4. (Fragment) "	3	0.973	2	0.721
12 2	trm|Q8WVW5|Q8WVW5_HUMAN	Hypothetical protein (Fragment)	1	1.126	2	0.631
12 48	spt|P05114|HMGN1_HUMAN	Nonhistone chromosomal protein HMG-14 (High-mobility group nucleosome- binding domain-containing protein 1)	1	0.775	2	0.7
12 56	spt|Q96ST3|SIN3A_HUMAN	Paired amphipathic helix protein Sin3a (Transcriptional corepressor Sin3a) (Histone deacetylase complex subunit Sin3a)	1	1.391	2	1.339
13 147	trm|Q5TC71|Q5TC71_HUMAN spt|Q8TF09|DLC2B_HUMAN spt|Q9NP97|DLC2A_HUMAN	OTTHUMP00000030692 "Dynein light chain 2B, cytoplasmic " "Dynein light chain 2A, cytoplasmic (Dynein-associated protein Km23) (Bithoraxoid-like protein) (BLP) "	1	0.829	2	0.996
13 164	spt|Q9H7B2|BXDC1_HUMAN trm|Q5VXN0|Q5VXN0_HUMAN trm|Q5VXM9|Q5VXM9_HUMAN	Brix domain-containing protein 1 Brix domain containing 1 (Fragment) Brix domain containing 1 (Fragment)	0		0
14 102	trm|Q7Z7J6|Q7Z7J6_HUMAN	Actin alpha 1 skeletal muscle protein	0		0
14 120	spt|P01606|KV1N_HUMAN	Ig kappa chain V-I region OU	0		0
14 148	trm|Q96ET3|Q96ET3_HUMAN	SH3BP5L protein (Fragment)	0		0
14 149	trm|Q549R9|Q549R9_HUMAN trm|Q9H319|Q9H319_HUMAN trm|Q549R8|Q549R8_HUMAN trm|Q45VM8|Q45VM8_HUMAN trm|Q45VM6|Q45VM6_HUMAN trm|Q45VM7|Q45VM7_HUMAN trm|Q53SB5|Q53SB5_HUMAN spt|P17661|DESM_HUMAN	Mutant desmin Mutant desmin Mutant desmin Mutant desmin Mutant desmin Mutant desmin Hypothetical protein tmp_locus_29 Desmin	0		0
14 151	spt|Q7Z407|CSMD3_HUMAN	CUB and sushi domain-containing protein 3 precursor (CUB and sushi multiple domains protein 3)	1	1.381	2	0.999
14 160	spt|Q16777|H2A2C_HUMAN spt|Q6FI13|H2A2A_HUMAN spt|Q99878|H2A1J_HUMAN spt|Q96KK5|H2A1H_HUMAN spt|P20671|H2A1D_HUMAN spt|P0C0S8|H2A1_HUMAN	Histone H2A type 2-C (H2A-GL101) (H2A/r) Histone H2A type 2-A (H2A.2) Histone H2A type 1-J Histone H2A type 1-H Histone H2A type 1-D (H2A.3) Histone H2A type 1 (H2A.1)	3	0.995	6	1.143	0.995	0.2
14 161	spt|P34931|HS70L_HUMAN trm|Q0JT73|Q0JT73_HUMAN trm|Q53FA3|Q53FA3_HUMAN	Heat shock 70 kDa protein 1L (Heat shock 70 kDa protein 1-like) (Heat shock 70 kDa protein 1-Hom) (HSP70-Hom) Hypothetical protein HSPA1L Heat shock 70kDa protein 1-like variant (Fragment)	1	0.756	2	0.787
14 30	trm|Q96C20|Q96C20_HUMAN	Hypothetical protein (Fragment)	3	0.779	3	0.737	-0.358	1
14 56	trm|Q6FHV0|Q6FHV0_HUMAN	MIF protein	3	0.757	6	1.103	1.4	0.15
14 93	trm|Q9P019|Q9P019_HUMAN	HSPC141	0		0
15 120	trm|Q8WZ78|Q8WZ78_HUMAN spt|Q99867|TBB4Q_HUMAN trm|Q3ZCM7|Q3ZCM7_HUMAN trm|Q5SQX9|Q5SQX9_HUMAN	Beta-tubulin 4Q Tubulin beta-4q chain TUBB8 protein (Fragment) Novel protein similar to beta-tubulin 4Q (TUBB4Q) (LOC253936) (Fragment)	1	0.649	2	1.007
15 126	trm|Q15786|Q15786_HUMAN	Testis calpastatin	1	1.153	2	1.128
15 148	spt|P05154|IPSP_HUMAN	Plasma serine protease inhibitor precursor (PCI) (Protein C inhibitor) (Serpin A5) (Plasminogen activator inhibitor 3) (PAI-3) (PAI3) (Acrosomal serine protease inhibitor)	1	0.775	2	1.479
15 165	trm|Q6MZJ1|Q6MZJ1_HUMAN	Hypothetical protein DKFZp686E1669	1	1.192	2	0.917
15 174	trm|Q96I69|Q96I69_HUMAN	Hypothetical protein	1	0.944	2	0.853
15 179	spt|P61081|UBC12_HUMAN	NEDD8-conjugating enzyme Ubc12 (EC 6.3.2.-) (Ubiquitin-conjugating enzyme E2 M) (NEDD8 protein ligase) (NEDD8 carrier protein)	1	1.331	2	1.229
15 182	trm|Q5TBS2|Q5TBS2_HUMAN trm|Q32P51|Q32P51_HUMAN	OTTHUMP00000018460 Heterogeneous nuclear ribonucleoprotein A1-like	3	1.052	3	1.185	0.66	1
15 187	trm|Q9BWE2|Q9BWE2_HUMAN trm|Q6I9R6|Q6I9R6_HUMAN trm|Q569G9|Q569G9_HUMAN	GBA protein Glucocerebrosidase GBA protein	0		0
15 192	trm|Q53H10|Q53H10_HUMAN	Postreplication repair protein hRAD18p variant (Fragment)	1	1.534	2	0.535
15 194	spt|Q99797|PMIP_HUMAN	Mitochondrial intermediate peptidase, mitochondrial precursor (EC 3.4.24.59) (MIP)	1	0.975	2	0.768
15 30	spt|Q05639|EF1A2_HUMAN	Elongation factor 1-alpha 2 (EF-1-alpha-2) (Elongation factor 1 A-2) (eEF1A-2) (Statin S1)	1	0.961	2	0.99
16 127	trm|Q8N274|Q8N274_HUMAN	CDNA FLJ33834 fis, clone CTONG2004264, moderately similar to NEUROBLAST DIFFERENTIATION ASSOCIATED PROTEIN AHNAK	5	0.925	1	0.908
16 145	spt|O60506|HNRPQ_HUMAN	Heterogeneous nuclear ribonucleoprotein Q (hnRNP Q) (hnRNP-Q) (Synaptotagmin-binding, cytoplasmic RNA-interacting protein) (Glycine- and tyrosine-rich RNA-binding protein) (GRY-RBP) (NS1-associated protein 1)	5	0.917	1	1.252
16 159	trm|Q6FIG4|Q6FIG4_HUMAN spt|Q9H0U4|RAB1B_HUMAN	RAB1B protein Ras-related protein Rab-1B	5	0.942	1	1.485
16 166	spt|Q9NQG5|CT077_HUMAN trm|Q6PKF4|Q6PKF4_HUMAN	Uncharacterized protein C20orf77 C20orf77 protein (Fragment)	2	1.01	1	1.985
16 177	spt|Q8N6V9|TEX9_HUMAN	Testis-expressed sequence 9 protein	2	0.876	1	0.331
16 188	spt|P12268|IMDH2_HUMAN trm|Q6RUP8|Q6RUP8_HUMAN	Inosine-5'-monophosphate dehydrogenase 2 (EC 1.1.1.205) (IMP dehydrogenase 2) (IMPDH-II) (IMPD 2) Inosine monophosphate dehydrogenase type II (Fragment)	2	0.856	1	1.789
16 198	spt|P02766|TTHY_HUMAN trm|Q8TDB2|Q8TDB2_HUMAN trm|Q53WY6|Q53WY6_HUMAN	Transthyretin precursor (Prealbumin) (TBPA) (TTR) (ATTR) Transthyretin amyloidosis variant D38V (Fragment) Transthyretin (Fragment)	5	0.959	1	1.272
16 211	spt|O14617|AP3D1_HUMAN	AP-3 complex subunit delta-1 (Adapter-related protein complex 3 subunit delta-1) (Delta-adaptin 3) (AP-3 complex subunit delta) (Delta-adaptin)	2	0.924	1	0.335
16 216	trm|O43180|O43180_HUMAN	Spinocerebellar ataxia 7 (Fragment)	0		0
16 219	trm|Q5HYI3|Q5HYI3_HUMAN spt|P42574|CASP3_HUMAN	Hypothetical protein DKFZp686N1815 Caspase-3 precursor (EC 3.4.22.-) (CASP-3) (Apopain) (Cysteine protease CPP32) (Yama protein) (CPP-32) (SREBP cleavage activity 1) (SCA-1) [Contains: Caspase-3 p17 subunit; Caspase-3 p12 subunit]	0		0
16 222	spt|Q9H307|PININ_HUMAN	Pinin (140 kDa nuclear and cell adhesion-related phosphoprotein) (Domain-rich serine protein) (DRS-protein) (DRSP) (Melanoma metastasis clone A protein) (Desmosome-associated protein) (SR-like protein) (Nuclear protein SDK3)	2	0.804	1	0.897
16 223	trm|Q5VVP3|Q5VVP3_HUMAN spt|Q9NR82|KCNQ5_HUMAN trm|Q17RE1|Q17RE1_HUMAN	Potassium voltage-gated channel, KQT-like subfamily, member 5 Potassium voltage-gated channel subfamily KQT member 5 (Voltage-gated potassium channel subunit Kv7.5) (Potassium channel subunit alpha KvLQT5) (KQT-like 5) KCNQ5 protein	2	0.754	1	0.95
16 224	trm|Q6NV74|Q6NV74_HUMAN	Similar to 2010300C02Rik protein	2	1.155	1	1.342
16 225	trm|Q68EM7|Q68EM7_HUMAN trm|Q96KS3|Q96KS3_HUMAN trm|Q96SS8|Q96SS8_HUMAN	Rho GTPase activating protein 17 RhoGAP protein "CDNA FLJ14661 fis, clone NT2RP2002710, weakly similar to SH3-BINDING PROTEIN 3BP-1 "	5	0.855	1	0.627
16 226	spt|Q14139|UBE4A_HUMAN	Ubiquitin conjugation factor E4 A	2	1.34	1	0.603
16 229	spt|P23229|ITA6_HUMAN trm|Q59HB7|Q59HB7_HUMAN	Integrin alpha-6 precursor (VLA-6) (CD49f antigen) [Contains: Integrin alpha-6 heavy chain; Integrin alpha-6 light chain] Integrin alpha-6 variant (Fragment)	2	0.836	1	1.84
16 231	spt|Q8NB78|AOF1_HUMAN	Flavin-containing amine oxidase domain-containing protein 1 (EC 1.-.-.-)	2	1.283	1	0.847
16 65	trm|Q6GMX9|Q6GMX9_HUMAN	IGKC protein	2	0.897	1	0.429
16 68	trm|Q96E61|Q96E61_HUMAN	Hypothetical protein	2	0.943	1	0.23
16 81	spt|P06702|S10A9_HUMAN	Protein S100-A9 (S100 calcium-binding protein A9) (Calgranulin-B) (Migration inhibitory factor-related protein 14) (MRP-14) (P14) (Leukocyte L1 complex heavy chain) (Calprotectin L1H subunit)	2	1.305	1	5.191
17 138	spt|P55209|NP1L1_HUMAN	Nucleosome assembly protein 1-like 1 (NAP-1-related protein) (hNRP)	5	0.859	1	0.875
17 193	spt|Q9P1F3|CF115_HUMAN	Protein C6orf115	2	1.002	1	1.641
17 199	spt|P26447|S10A4_HUMAN	Protein S100-A4 (S100 calcium-binding protein A4) (Metastasin) (Protein Mts1) (Placental calcium-binding protein) (Calvasculin)	2	0.694	1	1.434
17 226	spt|P68366|TBA1_HUMAN	Tubulin alpha-1 chain (Alpha-tubulin 1) (Testis-specific alpha- tubulin) (Tubulin H2-alpha)	2	1.218	1	1.295
17 231	spt|Q9NYF8|BCLF1_HUMAN trm|Q6DCA8|Q6DCA8_HUMAN	Bcl-2-associated transcription factor 1 (Btf) BCLAF1 protein (Fragment)	5	1.065	1	0.946
17 244	spt|Q13308|PTK7_HUMAN trm|Q8NFA6|Q8NFA6_HUMAN trm|Q8NFA7|Q8NFA7_HUMAN trm|Q8NFA8|Q8NFA8_HUMAN trm|Q6IQ54|Q6IQ54_HUMAN	Tyrosine-protein kinase-like 7 precursor (Colon carcinoma kinase 4) (CCK-4) Transmembrane receptor PTK7-4 Transmembrane receptor PTK7-3 Transmembrane receptor PTK7-2 PTK7 protein tyrosine kinase 7	2	2.201	1	1.54
17 246	trm|Q549U0|Q549U0_HUMAN spt|P08236|BGLR_HUMAN	Hypothetical protein GUSB (Glucuronidase, beta variant) Beta-glucuronidase precursor (EC 3.2.1.31) (Beta-G1)	2	1.277	1	0.928
17 249	spt|P08729|K2C7_HUMAN	Keratin, type II cytoskeletal 7 (Cytokeratin-7) (CK-7) (Keratin-7) (K7) (Sarcolectin)	1	1.534	1	7.51
17 252	trm|Q59HH3|Q59HH3_HUMAN spt|P22102|PUR2_HUMAN trm|Q3B7A7|Q3B7A7_HUMAN	Phosphoribosylglycinamide formyltransferase, phosphoribosylglycinamide synthetase, phosphoribosylaminoimidazole synthetase isoform 1 variant (Fragment) Trifunctional purine biosynthetic protein adenosine-3 [Includes: Phosphoribosylamine--glycine ligase (EC 6.3.4.13) (GARS) (Glycinamide ribonucleotide synthetase) (Phosphoribosylglycinamide synthetase); Phosphoribosylformylglycinamidine cyclo-ligas…	2	1.088	1	1.201
17 258	trm|Q59EP2|Q59EP2_HUMAN trm|Q53GY3|Q53GY3_HUMAN spt|P01019|ANGT_HUMAN trm|Q53YY1|Q53YY1_HUMAN trm|Q86U78|Q86U78_HUMAN	Angiotensinogen variant (Fragment) Angiotensinogen variant (Fragment) Angiotensinogen precursor [Contains: Angiotensin-1 (Angiotensin I) (Ang I); Angiotensin-2 (Angiotensin II) (Ang II); Angiotensin-3 (Angiotensin III) (Ang III) (Des-Asp[1]-angiotensin II)] "Angiotensinogen (Serine (Or cysteine) proteinase inhibitor, clade A (Alpha-1 antiproteinase, antitrypsin), member 8) (Angiotensinogen varian…	2	0.897	0
17 262	trm|Q6P4H0|Q6P4H0_HUMAN trm|Q6FII1|Q6FII1_HUMAN trm|Q0JSA7|Q0JSA7_HUMAN trm|Q2NLC8|Q2NLC8_HUMAN spt|Q9Y2Q3|GSTK1_HUMAN	GSTK1 protein LOC51064 protein Hypothetical protein GSTK1 (Fragment) GSTK1 protein (Fragment) Glutathione S-transferase kappa 1 (EC 2.5.1.18) (GST 13-13) (Glutathione S-transferase subunit 13) (GST class-kappa) (GSTK1-1) (hGSTK1)	2	1.076	1	1.979
17 266	trm|Q32LZ3|Q32LZ3_HUMAN spt|P46777|RL5_HUMAN	Ribosomal protein L5 60S ribosomal protein L5	2	1.034	1	1.262
17 27	trm|Q6GMV9|Q6GMV9_HUMAN	Hypothetical protein	5	1.252	1	0.881
17 279	trm|Q9UNM7|Q9UNM7_HUMAN	26S proteasome subunit p40.5 (Fragment)	2	1.062	1	1.35
17 281	trm|Q58FF7|Q58FF7_HUMAN	Heat shock protein 90Bc	2	0.962	1	0.69
17 289	trm|Q7Z3T9|Q7Z3T9_HUMAN	Hypothetical protein DKFZp686J1169	0		0
17 292	spt|Q9H2U2|IPYR2_HUMAN	Inorganic pyrophosphatase 2, mitochondrial precursor (EC 3.6.1.1) (PPase 2) (Pyrophosphatase SID6-306)	5	1.15	1	1.303
17 293	trm|Q53G20|Q53G20_HUMAN	Ribosomal protein L14 variant (Fragment)	2	1.111	1	1.919
17 305	trm|Q59FK3|Q59FK3_HUMAN	Annexin IV variant (Fragment)	2	1.021	1	1.081
17 306	spt|P61758|PFD3_HUMAN	Prefoldin subunit 3 (Von Hippel-Lindau-binding protein 1) (VHL-binding protein 1) (VBP-1) (HIBBJ46)	2	1.125	1	1.264
17 313	trm|Q9HAG4|Q9HAG4_HUMAN trm|Q9BTV5|Q9BTV5_HUMAN trm|Q9BXN0|Q9BXN0_HUMAN	CDNA FLJ11688 fis, clone HEMBA1004973, weakly similar to ZINC-BINDING PROTEIN A33 Fibronectin type III and SPRY domain containing 1 (Microtubule- associated protein GLFND) Fibronectin type 3 and SPRY domain-containing protein 1	2	0.608	1	0.332
17 315	trm|Q2NLC9|Q2NLC9_HUMAN spt|Q00577|PURA_HUMAN trm|Q56A79|Q56A79_HUMAN trm|Q5U0P9|Q5U0P9_HUMAN trm|Q2NLD4|Q2NLD4_HUMAN	PURA protein (Fragment) Transcriptional activator protein Pur-alpha (Purine-rich single- stranded DNA-binding protein alpha) Purine-rich element binding protein A Purine-rich element binding protein A PURA protein (Fragment)	0		1	0.951
17 319	trm|Q59GE4|Q59GE4_HUMAN trm|Q5TZB9|Q5TZB9_HUMAN trm|Q6PIR5|Q6PIR5_HUMAN spt|P46783|RS10_HUMAN	Ribosomal protein S10 variant (Fragment) Ribosomal protein S10 Hypothetical protein 40S ribosomal protein S10	2	1.053	1	2.568
17 32	spt|Q9BQE3|TBA6_HUMAN trm|Q53GA7|Q53GA7_HUMAN	Tubulin alpha-6 chain (Alpha-tubulin 6) Tubulin alpha 6 variant (Fragment)	6	0.941	8	1.145	1.151	0.15
17 320	spt|O43598|RCL_HUMAN	c-Myc-responsive protein Rcl	2	1.461	1	0.966
17 321	spt|O15144|ARPC2_HUMAN	Actin-related protein 2/3 complex subunit 2 (ARP2/3 complex 34 kDa subunit) (p34-ARC)	5	0.937	1	1.18
17 325	spt|P11177|ODPB_HUMAN trm|Q0JTK6|Q0JTK6_HUMAN	Pyruvate dehydrogenase E1 component subunit beta, mitochondrial precursor (EC 1.2.4.1) (PDHE1-B) Hypothetical protein PDHB (Fragment)	2	0.939	1	1.564
17 326	trm|Q5W1B9|Q5W1B9_HUMAN	OTTHUMP00000028841	2	0.927	1	2.366
17 330	trm|Q4VB08|Q4VB08_HUMAN spt|P24158|PRTN3_HUMAN	Proteinase 3 (Serine proteinase, neutrophil, Wegener granulomatosis autoantigen) Myeloblastin precursor (EC 3.4.21.76) (Leukocyte proteinase 3) (PR-3) (PR3) (AGP7) (Wegener autoantigen) (P29) (C-ANCA antigen) (Neutrophil proteinase 4) (NP-4)	2	1.438	1	2.978
17 335	trm|Q86YQ1|Q86YQ1_HUMAN	Hemoglobin alpha-2 (Fragment)	3	0.722	0
17 336	spt|P01770|HV3I_HUMAN	Ig heavy chain V-III region NIE	2	0.992	1	0.868
17 337	spt|O95881|TXD12_HUMAN	Thioredoxin domain-containing protein 12 precursor (EC 1.8.4.2) (Thioredoxin-like protein p19) (Endoplasmic reticulum protein ERp19) (ERp18) (hTLP19)	2	1.381	1	0.659
17 344	spt|P61026|RAB10_HUMAN	Ras-related protein Rab-10	0		1	1.059
17 349	spt|Q96GD0|PLPP_HUMAN	Pyridoxal phosphate phosphatase (EC 3.1.3.74) (PLP phosphatase)	2	1.162	1	0.771
17 352	trm|Q68CK1|Q68CK1_HUMAN spt|Q96PD5|PGRP2_HUMAN	Peptidoglycan recognition protein L N-acetylmuramoyl-L-alanine amidase precursor (EC 3.5.1.28) (Peptidoglycan recognition protein long) (PGRP-L) (Peptidoglycan recognition protein 2)	2	0.981	1	0.506
17 370	spt|P22695|UQCR2_HUMAN	Ubiquinol-cytochrome-c reductase complex core protein 2, mitochondrial precursor (EC 1.10.2.2) (Complex III subunit II)	2	1.173	1	1.967
17 373	spt|P46108|CRK_HUMAN trm|Q96HJ0|Q96HJ0_HUMAN trm|Q96GA9|Q96GA9_HUMAN	Proto-oncogene C-crk (P38) (Adapter molecule crk) V-crk sarcoma virus CT10 oncogene homolog (Avian) V-crk sarcoma virus CT10 oncogene homolog (Avian)	2	1.435	1	1.365
17 383	trm|Q5T3P3|Q5T3P3_HUMAN spt|Q13126|MTAP_HUMAN trm|Q6FHP1|Q6FHP1_HUMAN trm|Q6FHT1|Q6FHT1_HUMAN trm|Q8WV80|Q8WV80_HUMAN trm|Q5VYJ1|Q5VYJ1_HUMAN	Methylthioadenosine phosphorylase S-methyl-5-thioadenosine phosphorylase (EC 2.4.2.28) (5'- methylthioadenosine phosphorylase) (MTA phosphorylase) (MTAPase) MTAP protein (Fragment) MTAP protein MTAP protein Methylthioadenosine phosphorylase	3	1.044	1	1.003
17 387	spt|Q14914|LTB4D_HUMAN trm|Q5JVP3|Q5JVP3_HUMAN trm|Q5JVP4|Q5JVP4_HUMAN	NADP-dependent leukotriene B4 12-hydroxydehydrogenase (EC 1.3.1.74) (15-oxoprostaglandin 13-reductase) (EC 1.3.1.48) Leukotriene B4 12-hydroxydehydrogenase Leukotriene B4 12-hydroxydehydrogenase	5	0.904	1	0.651
17 390	spt|Q9Y2V2|CHSP1_HUMAN	Calcium-regulated heat stable protein 1 (Calcium-regulated heat-stable protein of 24 kDa) (CRHSP-24)	2	0.861	1	0.956
17 392	trm|Q6FGN8|Q6FGN8_HUMAN trm|Q53FH7|Q53FH7_HUMAN trm|Q5HY50|Q5HY50_HUMAN trm|Q2HXT7|Q2HXT7_HUMAN spt|P27635|RL10_HUMAN	RPL10 protein (Hypothetical protein RPL10) (QM protein) (QM protein isoform 2) (Fragment) Ribosomal protein L10 variant (Fragment) Ribosomal protein L10 (Fragment) QM protein (QM protein isoform 1) 60S ribosomal protein L10 (QM protein) (Tumor suppressor QM) (Laminin receptor homolog)	2	0.867	1	1.502
17 395	trm|Q6IA90|Q6IA90_HUMAN spt|Q9NVH6|TMLH_HUMAN trm|Q8TBT0|Q8TBT0_HUMAN	TMLHE protein "Trimethyllysine dioxygenase, mitochondrial precursor (EC 1.14.11.8) (Epsilon-trimethyllysine 2-oxoglutarate dioxygenase) (TML-alpha- ketoglutarate dioxygenase) (TML hydroxylase) (TML dioxygenase) (TMLD) " "TMLHE protein (Hypothetical protein TMLHE) (Trimethyllysine hydroxylase, epsilon) "	0		1	1.253
17 399	spt|P04181|OAT_HUMAN trm|Q59HE2|Q59HE2_HUMAN trm|Q68CS0|Q68CS0_HUMAN	Ornithine aminotransferase, mitochondrial precursor (EC 2.6.1.13) (Ornithine--oxo-acid aminotransferase) [Contains: Ornithine aminotransferase, hepatic form; Ornithine aminotransferase, renal form] Ornithine aminotransferase variant (Fragment) Hypothetical protein DKFZp781A11155	2	1.309	1	1.159
17 404	spt|P45973|CBX5_HUMAN trm|Q6I9T7|Q6I9T7_HUMAN	Chromobox protein homolog 5 (Heterochromatin protein 1 homolog alpha) (HP1 alpha) (Antigen p25) CBX5 protein	2	1.028	1	2.061
17 409	trm|Q9BRP8|Q9BRP8_HUMAN trm|Q8N8E7|Q8N8E7_HUMAN	Within bgcn homolog (Drosophila) "CDNA FLJ39603 fis, clone SKNSH2005120, weakly similar to Drosophila melanogaster WIBG (wibg) mRNA "	0		0
17 411	spt|Q7L5N1|CSN6_HUMAN	COP9 signalosome complex subunit 6 (Signalosome subunit 6) (SGN6) (JAB1-containing signalosome subunit 6) (Vpr-interacting protein) (hVIP) (MOV34 homolog)	2	0.771	1	0.883
17 415	spt|P14854|CX6B1_HUMAN	Cytochrome c oxidase subunit VIb isoform 1 (EC 1.9.3.1) (COX VIb-1)	0		0
17 421	trm|Q53Y51|Q53Y51_HUMAN spt|P30046|DOPD_HUMAN	D-dopachrome tautomerase D-dopachrome decarboxylase (EC 4.1.1.84) (D-dopachrome tautomerase) (Phenylpyruvate tautomerase II)	5	0.893	1	0.695
17 422	spt|Q9Y5J9|TIM8B_HUMAN	Mitochondrial import inner membrane translocase subunit Tim8 B (Deafness dystonia protein 2) (DDP-like protein)	2	0.992	1	1.749
17 425	spt|Q96AT9|RPE_HUMAN	Ribulose-phosphate 3-epimerase (EC 5.1.3.1) (Ribulose-5-phosphate-3- epimerase)	0		0
17 437	spt|Q07021|C1QBP_HUMAN	Complement component 1 Q subcomponent-binding protein, mitochondrial precursor (Glycoprotein gC1qBP) (C1qBP) (GC1q-R protein) (Hyaluronan- binding protein 1) (Mitochondrial matrix protein p32) (p33)	5	0.948	1	1.737
17 441	spt|P55795|HNRH2_HUMAN	Heterogeneous nuclear ribonucleoprotein H' (hnRNP H') (FTP-3)	3	1.144	2	1.451
17 442	spt|P57043|ILK2_HUMAN	Integrin-linked protein kinase 2 (EC 2.7.11.1) (ILK-2)	2	0.849	1	0.719
17 444	spt|Q9Y561|LRP12_HUMAN trm|Q59H02|Q59H02_HUMAN	Low-density lipoprotein receptor-related protein 12 precursor (Suppressor of tumorigenicity protein 7) Suppression of tumorigenicity variant (Fragment)	2	0.842	1	0.97
17 447	trm|Q6FHD2|Q6FHD2_HUMAN spt|O00625|PIR_HUMAN	PIR protein (Fragment) Pirin	2	0.663	1	0.73
17 448	trm|Q9NZ48|Q9NZ48_HUMAN	Uncharacterized hematopoietic stem/progenitor cells protein MDS026	1	1.685	1	1.096
17 452	spt|O95295|S25BP_HUMAN	SNARE-associated protein Snapin (Synaptosomal-associated protein 25- binding protein) (SNAP-associated protein)	2	1.251	1	1.561
17 453	spt|Q96Q15|SMG1_HUMAN	Serine/threonine-protein kinase SMG1 (EC 2.7.11.1) (SMG-1) (hSMG-1) (Lambda/iota protein kinase C-interacting protein) (Lambda-interacting protein) (61E3.4)	1	7.944	0
17 454	trm|Q5JWV9|Q5JWV9_HUMAN	Hypothetical protein DKFZp586J0724	2	0.878	1	0.686
17 460	spt|Q9ULZ3|ASC_HUMAN	Apoptosis-associated speck-like protein containing a CARD (hASC) (PYD and CARD domain-containing protein) (Target of methylation-induced silencing 1) (Caspase recruitment domain-containing protein 5)	2	0.826	1	0.848
17 462	trm|Q53F20|Q53F20_HUMAN spt|Q9BTT0|AN32E_HUMAN trm|Q5TB20|Q5TB20_HUMAN	Acidic (Leucine-rich) nuclear phosphoprotein 32 family, member E variant (Fragment) Acidic leucine-rich nuclear phosphoprotein 32 family member E (LANP- like protein) (LANP-L) "Acidic (Leucine-rich) nuclear phosphoprotein 32 family, member E "	2	0.823	1	1.01
17 463	trm|Q6ZNW8|Q6ZNW8_HUMAN	CDNA FLJ26989 fis, clone SLV03395	2	0.925	1	0.885
18 127	trm|Q3MIB7|Q3MIB7_HUMAN	HNRPA1 protein	2	0.848	1	2.279
18 183	spt|P35221|CTNA1_HUMAN	Catenin alpha-1 (Cadherin-associated protein) (Alpha E-catenin) (NY- REN-13 antigen)	2	1.023	1	0.723
18 189	trm|Q13707|Q13707_HUMAN	ACTA2 protein (Fragment)	2	0.699	1	0.485
18 195	trm|Q9BV20|Q9BV20_HUMAN	Hypothetical protein MGC3207 (TLEA6390)	2	0.996	1	1.303
18 202	trm|Q6NT58|Q6NT58_HUMAN spt|P41159|LEP_HUMAN	Leptin, Leptin precursor (Obesity factor) (Obese protein)	0		0
18 215	spt|Q16531|DDB1_HUMAN	DNA damage-binding protein 1 (Damage-specific DNA-binding protein 1) (UV-damaged DNA-binding factor) (DDB p127 subunit) (DDBa) (UV-damaged DNA-binding protein 1) (UV-DDB 1) (Xeroderma pigmentosum group E- complementing protein) (XPCe) (XPE-binding factor) (XPE-BF) (X- associated protein 1) (XAP-1)	1	19.153	0
18 223	trm|Q5JXI7|Q5JXI7_HUMAN spt|Q13642|FHL1_HUMAN trm|Q53FI7|Q53FI7_HUMAN trm|Q5JXI8|Q5JXI8_HUMAN trm|Q5JXI3|Q5JXI3_HUMAN trm|Q5JXH8|Q5JXH8_HUMAN trm|Q5JXH7|Q5JXH7_HUMAN trm|Q5JXI0|Q5JXI0_HUMAN trm|Q5JXH9|Q5JXH9_HUMAN trm|Q5JXI2|Q5JXI2_HUMAN trm|Q6IB30|Q6IB30_HUMAN	Four and a half LIM domains 1 Four and a half LIM domains protein 1 (FHL-1) (Skeletal muscle LIM- protein 1) (SLIM 1) (SLIM) Four and a half LIM domains 1 variant (Fragment) Four and a half LIM domains 1 (Fragment) Four and a half LIM domains 1 (Fragment) Four and a half LIM domains 1 (Fragment) Four and a half LIM domains 1 (Fragment) Four and a half LIM domains 1 (Fragment) Four and a half LIM …	5	0.976	1	0.244
18 226	spt|P48739|PIPNB_HUMAN	Phosphatidylinositol transfer protein beta isoform (PtdIns transfer protein beta) (PtdInsTP) (PI-TP-beta)	2	1.401	1	0.96
18 236	trm|Q5TGA2|Q5TGA2_HUMAN	Peptidyl-prolyl cis-trans isomerase (EC 5.2.1.8)	2	0.937	1	1.455
18 254	spt|Q15369|ELOC_HUMAN	Transcription elongation factor B polypeptide 1 (RNA polymerase II transcription factor SIII subunit C) (SIII p15) (Elongin-C) (EloC) (Elongin 15 kDa subunit)	5	0.92	1	0.784
18 258	trm|Q5W128|Q5W128_HUMAN	Dynamin 3	0		0
18 262	trm|Q8TF72|Q8TF72_HUMAN	Shroom-related protein	2	0.922	1	0.711
18 263	trm|Q6LBS1|Q6LBS1_HUMAN spt|P63162|RSMN_HUMAN trm|Q53HE7|Q53HE7_HUMAN	SmB /B' autoimmune antigene (Fragment) Small nuclear ribonucleoprotein-associated protein N (snRNP-N) (Sm protein N) (Sm-N) (SmN) (Sm-D) (Tissue-specific-splicing protein) Small nuclear ribonucleoprotein polypeptide N variant (Fragment)	2	0.978	1	1.825
18 275	trm|Q96I57|Q96I57_HUMAN	MYH7B protein (Fragment)	0		0
18 277	trm|Q6R7N2|Q6R7N2_HUMAN	Hemoglobin beta	5	1.017	1	0.992
18 280	trm|Q96JU8|Q96JU8_HUMAN	CDNA FLJ14963 fis, clone PLACE4000522, weakly similar to NEUROGENIC LOCUS NOTCH PROTEIN	0		0
18 281	trm|Q9ULE6|Q9ULE6_HUMAN trm|Q5JTK8|Q5JTK8_HUMAN	KIAA1274 protein (Fragment) Paladin	0		0
18 284	trm|Q4VX21|Q4VX21_HUMAN	Chromosome 1 open reading frame 2	0		0
18 289	trm|Q8WWQ0|Q8WWQ0_HUMAN trm|Q96ME2|Q96ME2_HUMAN	WD repeat domain 11 protein (Fragment) "CDNA FLJ32477 fis, clone SKNMC2000698, highly similar to Mus musculus ndrp neuronal differentiaion related protein. (Fragment) "	2	1.064	1	1.583
18 291	trm|Q7KZS6|Q7KZS6_HUMAN	Tubulin, beta, 4	2	1.091	1	1.146
19 164	spt|P21980|TGM2_HUMAN	Protein-glutamine gamma-glutamyltransferase 2 (EC 2.3.2.13) (Tissue transglutaminase) (TGase C) (TGC) (TG(C)) (Transglutaminase-2) (TGase- H)	3	0.75	0
19 183	spt|P04207|KV3H_HUMAN trm|Q9UL85|Q9UL85_HUMAN	Ig kappa chain V-III region CLL precursor (Rheumatoid factor) Myosin-reactive immunoglobulin kappa chain variable region (Fragment)	0		0
19 189	spt|Q96AC1|PKHC1_HUMAN	Pleckstrin homology domain-containing family C member 1 (Kindlin-2) (Mitogen-inducible gene 2 protein) (Mig-2)	0		0
19 21	trm|Q2KHP4|Q2KHP4_HUMAN	Hypothetical protein	8	0.986	6	0.946	-0.515	1
19 239	spt|Q96FJ2|DYL2_HUMAN	Dynein light chain 2, cytoplasmic (Dynein light chain LC8-type 2)	5	0.974	1	0.742
19 241	trm|Q5VVN3|Q5VVN3_HUMAN spt|Q8IYB3|SRRM1_HUMAN	Serine\/arginine repetitive matrix 1 Serine/arginine repetitive matrix protein 1 (Ser/Arg-related nuclear matrix protein) (SR-related nuclear matrix protein of 160 kDa) (SRm160)	3	1.109	0
19 247	trm|Q17R68|Q17R68_HUMAN spt|P00325|ADH1B_HUMAN spt|P07327|ADH1A_HUMAN	Alcohol dehydrogenase 1A (Class I), alpha polypeptide Alcohol dehydrogenase 1B (EC 1.1.1.1) (Alcohol dehydrogenase beta subunit) Alcohol dehydrogenase 1A (EC 1.1.1.1) (Alcohol dehydrogenase alpha subunit)	3	1.071	0
19 253	spt|P04632|CPNS1_HUMAN	Calpain small subunit 1 (CSS1) (Calcium-dependent protease small subunit 1) (Calcium-dependent protease small subunit) (CDPS) (Calpain regulatory subunit) (Calcium-activated neutral proteinase small subunit) (CANP small subunit)	3	1.312	0
19 267	trm|Q86YQ4|Q86YQ4_HUMAN	Alpha-1 globin (Fragment)	0		0
19 282	trm|Q2Q9B7|Q2Q9B7_HUMAN trm|Q2VF42|Q2VF42_HUMAN trm|Q2Q9H2|Q2Q9H2_HUMAN spt|P11413|G6PD_HUMAN	Glucose-6-phosphate 1-dehydrogenase (Fragment) Glucose-6-phosphate dehydrogenase (Glucose-6-phosphate 1- dehydrogenase) (Fragment) Glucose-6-phosphate 1-dehydrogenase (Fragment) Glucose-6-phosphate 1-dehydrogenase (EC 1.1.1.49) (G6PD)	3	1.047	0
19 285	trm|Q6IAT8|Q6IAT8_HUMAN spt|P61769|B2MG_HUMAN	B2M protein Beta-2-microglobulin precursor [Contains: Beta-2-microglobulin variant pI 5.3]	3	0.914	0
19 288	trm|Q8IWP4|Q8IWP4_HUMAN spt|Q9NRM1|ENAM_HUMAN trm|Q17RI5|Q17RI5_HUMAN	Enamelin Enamelin precursor Enamelin	3	1.141	0
19 289	trm|Q15300|Q15300_HUMAN	RET tyrosine kinase/cAMP protein kinase A subunit RI (Fragment)	3	0.946	0
19 295	spt|Q04828|AK1C1_HUMAN spt|P52895|AK1C2_HUMAN	Aldo-keto reductase family 1 member C1 (EC 1.1.1.-) (20-alpha- hydroxysteroid dehydrogenase) (EC 1.1.1.149) (20-alpha-HSD) (Trans- 1,2-dihydrobenzene-1,2-diol dehydrogenase) (EC 1.3.1.20) (High- affinity hepatic bile acid-binding protein) (HBAB) (Chlordecone reductase homolog HAKRC) (Dihydrodiol dehydrogenase 1/2) (DD1/DD2) "Aldo-keto reductase family 1 member C2 (EC 1.-.-.-) (Trans-1,2- dihydrob…	0		0
19 300	trm|Q6GMV8|Q6GMV8_HUMAN	Hypothetical protein	3	0.911	0
19 309	spt|P08397|HEM3_HUMAN	Porphobilinogen deaminase (EC 2.5.1.61) (Hydroxymethylbilane synthase) (HMBS) (Pre-uroporphyrinogen synthase) (PBG-D)	0		0
19 314	trm|Q7Z3B5|Q7Z3B5_HUMAN spt|P28074|PSB5_HUMAN	Hypothetical protein DKFZp686I0180 (Fragment) Proteasome subunit beta type 5 precursor (EC 3.4.25.1) (Proteasome epsilon chain) (Macropain epsilon chain) (Multicatalytic endopeptidase complex epsilon chain) (Proteasome subunit X) (Proteasome chain 6) (Proteasome subunit MB1)	3	0.429	0
19 317	trm|Q0JT32|Q0JT32_HUMAN spt|Q9NTK5|PTD4_HUMAN	Hypothetical protein PTD004 (Fragment) Putative GTP-binding protein PTD004	3	1.238	0
19 330	trm|Q6IB74|Q6IB74_HUMAN spt|P19652|A1AG2_HUMAN	ORM2 protein Alpha-1-acid glycoprotein 2 precursor (AGP 2) (Orosomucoid-2) (OMD 2)	3	0.881	0
19 334	spt|Q15063|POSTN_HUMAN trm|Q29XZ0|Q29XZ0_HUMAN trm|Q5VSY6|Q5VSY6_HUMAN trm|Q5VSY7|Q5VSY7_HUMAN trm|Q5VSY8|Q5VSY8_HUMAN	Periostin precursor (PN) (Osteoblast-specific factor 2) (OSF-2) Periodontal ligament-specific periostin OTTHUMP00000018271 OTTHUMP00000018270 OTTHUMP00000018269 (POSTN protein)	0		0
19 342	trm|Q9Y2V5|Q9Y2V5_HUMAN trm|Q9BPW3|Q9BPW3_HUMAN trm|O43294|O43294_HUMAN	Androgen receptor coactivator ARA55 Transforming growth factor beta 1 induced transcript 1 Hic-5 (Fragment)	0		0
19 344	trm|Q59F97|Q59F97_HUMAN spt|P35237|SPB6_HUMAN trm|Q5TD06|Q5TD06_HUMAN trm|Q8IXH2|Q8IXH2_HUMAN trm|Q7Z2Y7|Q7Z2Y7_HUMAN	Hypothetical protein (Fragment) Serpin B6 (Placental thrombin inhibitor) (Cytoplasmic antiproteinase) (CAP) (Protease inhibitor 6) (PI-6) OTTHUMP00000017779 (SERPINB6 protein) MSTP057 Hypothetical protein DKFZp686I04222	3	0.997	0
19 377	spt|Q15847|APM2_HUMAN	Adipose most abundant gene transcript 2	0		0
19 379	trm|Q9ULC4|Q9ULC4_HUMAN trm|Q502X6|Q502X6_HUMAN	Multiple copies in a T-cell malignancies (MCT1) (Malignant T cell amplified sequence 1) MCTS1 protein	0		0
19 381	trm|Q7M4N5|Q7M4N5_HUMAN	P68 protein (Fragments)	3	0.664	0
19 382	spt|P62312|LSM6_HUMAN	U6 snRNA-associated Sm-like protein LSm6 (Sm protein F)	3	1.227	0
19 383	spt|P63173|RL38_HUMAN	60S ribosomal protein L38	0		0
19 388	spt|Q86UK5|LBN_HUMAN trm|Q4W5B1|Q4W5B1_HUMAN	Limbin Hypothetical protein EVC2 (Fragment)	3	0.597	0
19 391	trm|Q59GP7|Q59GP7_HUMAN	Interleukin enhancer binding factor 3 isoform c variant (Fragment)	3	1.065	0
19 397	spt|P19827|ITIH1_HUMAN trm|Q32MI5|Q32MI5_HUMAN	Inter-alpha-trypsin inhibitor heavy chain H1 precursor (ITI heavy chain H1) (Inter-alpha-inhibitor heavy chain 1) (Inter-alpha-trypsin inhibitor complex component III) (Serum-derived hyaluronan-associated protein) (SHAP) ITIH1 protein	3	0.924	0
19 399	trm|Q9BVU3|Q9BVU3_HUMAN trm|Q96EC4|Q96EC4_HUMAN	AHNAK nucleoprotein (Desmoyokin) AHNAK nucleoprotein (Desmoyokin)	0		0
19 407	spt|Q9Y4Z0|LSM4_HUMAN	U6 snRNA-associated Sm-like protein LSm4 (Glycine-rich protein) (GRP)	0		0
19 410	spt|Q14683|SMC1A_HUMAN	Structural maintenance of chromosome 1-like 1 protein (SMC1alpha protein) (Sb1.8)	0		0
19 420	spt|Q9Y5S2|MRCKB_HUMAN	Serine/threonine-protein kinase MRCK beta (EC 2.7.11.1) (CDC42-binding protein kinase beta) (Myotonic dystrophy kinase-related CDC42-binding kinase beta) (Myotonic dystrophy protein kinase-like beta) (MRCK beta) (DMPK-like beta)	3	0.595	0
19 424	trm|Q5VZS6|Q5VZS6_HUMAN trm|Q53EL6|Q53EL6_HUMAN trm|Q8TAR5|Q8TAR5_HUMAN	Programmed cell death 4 (Neoplastic transformation inhibitor) Programmed cell death 4 isoform 1 variant (Fragment) Programmed cell death 4 (Neoplastic transformation inhibitor)	3	1.156	0
19 426	spt|Q96GG9|DCNL1_HUMAN	DCN1-like protein 1 (Defective in cullin neddylation protein 1-like protein 1) (DCUN1 domain-containing protein 1) (Squamous cell carcinoma-related oncogene)	3	0.739	0
19 84	trm|Q5U0D9|Q5U0D9_HUMAN	Tropomyosin 4	10	0.958	10	1.098	1.503	0.1
2 100	trm|Q8TAU5|Q8TAU5_HUMAN trm|Q14244|Q14244_HUMAN trm|Q9NY83|Q9NY83_HUMAN trm|Q9NY82|Q9NY82_HUMAN	MAP7 protein Microtubule associated protein (Microtubule-associated protein 7) E-MAP-115-95 (Epithelial microtubule-associated protein) E-MAP-115-105 (Epithelial microtubule-associated protein)	1	0.876	2	1.63
2 110	spt|P12270|TPR_HUMAN trm|Q5SWY0|Q5SWY0_HUMAN trm|Q99968|Q99968_HUMAN	Nucleoprotein TPR Translocated promoter region (To activated MET oncogene) Tpr	2	1.032	4	1.109
2 111	trm|Q6ZRT8|Q6ZRT8_HUMAN	CDNA FLJ46113 fis, clone TESTI2036285, highly similar to Rattus norvegicus ubiquitin C (Ubc)	7	0.873	5	1.154	3.643	0.002
2 114	trm|Q9BQ09|Q9BQ09_HUMAN trm|Q96BA7|Q96BA7_HUMAN trm|Q5RI17|Q5RI17_HUMAN	Heterogeneous nuclear ribonucleoprotein U (Scaffold attachment factor A) HNRPU protein Heterogeneous nuclear ribonucleoprotein U (Scaffold attachment factor A) (Fragment)	5	1.025	4	1.229	1.39	0.15
2 118	trm|Q96GD8|Q96GD8_HUMAN spt|O00515|LAD1_HUMAN trm|Q6IPJ9|Q6IPJ9_HUMAN trm|Q63HQ8|Q63HQ8_HUMAN	Ladinin 1 Ladinin 1 (Lad-1) (120 kDa linear IgA bullous dermatosis antigen) (97 kDa linear IgA bullous dermatosis antigen) (Linear IgA disease antigen homolog) (LadA) Ladinin 1 Hypothetical protein DKFZp686M21196	2	0.985	5	1.848
2 121	trm|Q59G24|Q59G24_HUMAN trm|Q6IBA2|Q6IBA2_HUMAN spt|P53999|TCP4_HUMAN	Activated RNA polymerase II transcription cofactor 4 variant (Fragment) PC4 protein (SUB1 homolog) (S. cerevisiae) Activated RNA polymerase II transcriptional coactivator p15 (SUB1 homolog) (Positive cofactor 4) (PC4) (p14)	7	1.073	5	1.153	0.514	1
2 124	trm|Q5T1C0|Q5T1C0_HUMAN	Dedicator of cytokinesis 7	1	0.97	2	0.763
2 128	trm|Q6PJ02|Q6PJ02_HUMAN	CTSZ protein (Fragment)	1	0.946	2	1.013
2 130	trm|Q6N095|Q6N095_HUMAN	Hypothetical protein DKFZp686K03196	5	0.897	4	0.49	-3.528	0.005
2 133	trm|Q6IAM0|Q6IAM0_HUMAN spt|O75821|IF34_HUMAN	EIF3S4 protein Eukaryotic translation initiation factor 3 subunit 4 (eIF-3 delta) (eIF3 p44) (eIF-3 RNA-binding subunit) (eIF3 p42) (eIF3g)	3	0.932	3	1.347	3.056	0.025
2 135	trm|Q8N5A0|Q8N5A0_HUMAN trm|Q53SI8|Q53SI8_HUMAN spt|O60841|IF2P_HUMAN	Eukaryotic translation initiation factor 5B Hypothetical protein IF2 (Fragment) Eukaryotic translation initiation factor 5B (eIF-5B) (Translation initiation factor IF-2)	1	0.655	2	1.158
2 136	spt|Q9P258|RCC2_HUMAN	Protein RCC2 (Telophase disk protein of 60 kDa) (RCC1-like protein TD- 60)	1	0.719	2	0.763
2 138	spt|P98179|RBM3_HUMAN	Putative RNA-binding protein 3 (RNA-binding motif protein 3) (RNPL)	1	0.753	2	0.925
2 14	trm|Q6N089|Q6N089_HUMAN trm|Q7Z7P5|Q7Z7P5_HUMAN	Hypothetical protein DKFZp686P15220 IGHG1 protein	7	1.247	8	0.878	-1.687	0.1
2 149	spt|P31153|METK2_HUMAN	S-adenosylmethionine synthetase isoform type-2 (EC 2.5.1.6) (Methionine adenosyltransferase 2) (AdoMet synthetase 2) (Methionine adenosyltransferase II) (MAT-II)	4	0.718	8	1.07	1.014	0.2
2 151	spt|Q13765|NACA_HUMAN	Nascent polypeptide-associated complex subunit alpha (NAC-alpha) (Alpha-NAC) (Hom s 2.02)	8	1.05	7	1.124	0.467	1
2 155	trm|Q8IW90|Q8IW90_HUMAN	MTCH1 protein (Fragment)	0		0
2 164	spt|P43897|EFTS_HUMAN trm|Q561V7|Q561V7_HUMAN	Elongation factor Ts, mitochondrial precursor (EF-Ts) (EF-TsMt) TSFM protein	1	1.302	2	1.345
2 165	spt|Q9Y266|NUDC_HUMAN	Nuclear migration protein nudC (Nuclear distribution protein C homolog)	2	0.903	4	1.193
2 169	trm|Q498Y6|Q498Y6_HUMAN spt|P62280|RS11_HUMAN	RPS11 protein 40S ribosomal protein S11	3	0.841	3	1.992	8.101	0.001
2 172	spt|P84101|SERF2_HUMAN	Small EDRK-rich factor 2 (4F5rel) (h4F5rel) (Gastric cancer-related protein VRG107)	1	0.838	2	0.971
2 176	spt|P10109|ADX_HUMAN	Adrenodoxin, mitochondrial precursor (Adrenal ferredoxin) (Ferredoxin- 1) (Hepatoredoxin)	1	0.923	2	1.03
2 178	trm|Q8IV56|Q8IV56_HUMAN	Proline rich 15	1	1.792	2	0.58
2 18	trm|Q8N532|Q8N532_HUMAN	TUBA6 protein	1	1.146	2	0.885
2 182	spt|Q9BS26|TXND4_HUMAN	Thioredoxin domain-containing protein 4 precursor (Endoplasmic reticulum resident protein ERp44)	4	1.111	5	0.907	-1.684	0.1
2 184	spt|Q7Z478|DHX29_HUMAN	Putative ATP-dependent RNA helicase DHX29 (EC 3.6.1.-) (DEAH box protein 29) (Nucleic acid helicase DDXx)	1	1.46	2	1.537
2 185	trm|Q6ZRU9|Q6ZRU9_HUMAN	CDNA FLJ46080 fis, clone TESTI2004971	1	1.312	2	1.126
2 188	trm|Q8N8Y7|Q8N8Y7_HUMAN spt|P38159|HNRPG_HUMAN	CDNA FLJ38696 fis, clone KIDNE2001931, highly similar to HETEROGENEOUS NUCLEAR RIBONUCLEOPROTEIN G "Heterogeneous nuclear ribonucleoprotein G (hnRNP G) (RNA-binding motif protein, X chromosome) (Glycoprotein p43) "	1	0.369	2	0.467
2 190	trm|Q68DQ4|Q68DQ4_HUMAN spt|P10644|KAP0_HUMAN	Hypothetical protein DKFZp779L0468 cAMP-dependent protein kinase type I-alpha regulatory subunit (Tissue- specific extinguisher 1) (TSE1)	1	0.956	2	1.236
2 191	trm|Q8IUI9|Q8IUI9_HUMAN	FMR1 (Fragment)	0		0
2 193	spt|P62081|RS7_HUMAN	40S ribosomal protein S7	0		0
2 195	spt|Q13442|HAP28_HUMAN	28 kDa heat- and acid-stable phosphoprotein (PDGF-associated protein) (PAP) (PDGFA-associated protein 1) (PAP1)	3	1.054	3	1.424	3.435	0.025
2 198	spt|P20930|FILA_HUMAN	Filaggrin	1	1.432	2	0.813
2 200	trm|Q15010|Q15010_HUMAN	KIAA0023 protein (Nucleoporin 214kDa)	1	1.712	2	0.968
2 204	trm|Q53GY4|Q53GY4_HUMAN spt|P54136|SYRC_HUMAN	Arginyl-tRNA synthetase variant (Fragment) "Arginyl-tRNA synthetase, cytoplasmic (EC 6.1.1.19) (Arginine--tRNA ligase) (ArgRS) "	1	0.989	2	0.872
2 208	trm|Q8N998|Q8N998_HUMAN	CDNA FLJ38159 fis, clone DFNES2001404 (Coiled-coil domain containing 89)	1	2.427	2	1.157
2 209	trm|Q6IPI1|Q6IPI1_HUMAN trm|Q5T1D1|Q5T1D1_HUMAN spt|P47914|RL29_HUMAN	Ribosomal protein L29 OTTHUMP00000017090 (Fragment) 60S ribosomal protein L29 (Cell surface heparin-binding protein HIP)	2	1.029	5	1.963
2 213	trm|Q9Y6E3|Q9Y6E3_HUMAN trm|Q53GN6|Q53GN6_HUMAN spt|Q9UNM6|PSD13_HUMAN	HSPC027 Proteasome 26S non-ATPase subunit 13 isoform 1 variant (Fragment) 26S proteasome non-ATPase regulatory subunit 13 (26S proteasome regulatory subunit S11) (26S proteasome regulatory subunit p40.5)	1	1.251	2	1.312
2 215	trm|Q7Z7A6|Q7Z7A6_HUMAN trm|Q6ZUD8|Q6ZUD8_HUMAN spt|P42704|LPPRC_HUMAN	Leucine-rich PPR motif-containing protein "CDNA FLJ43793 fis, clone TESTI4000014, highly similar to 130 kDa leucine-rich protein " 130 kDa leucine-rich protein (LRP 130) (GP130) (Leucine-rich PPR motif-containing protein)	1	1.262	2	1.337
2 217	trm|Q6FHS5|Q6FHS5_HUMAN spt|P25774|CATS_HUMAN	CTSS protein Cathepsin S precursor (EC 3.4.22.27)	1	0.803	2	1.047
2 218	spt|P12314|FCGR1_HUMAN	High affinity immunoglobulin gamma Fc receptor I precursor (Fc-gamma RI) (FcRI) (IgG Fc receptor I) (CD64 antigen)	0		0
2 24	trm|Q15657|Q15657_HUMAN	Tropomyosin isoform	1	0.711	2	0.577
2 40	trm|Q6J1Z7|Q6J1Z7_HUMAN	Hemoglobin beta (Fragment)	0		0
2 48	trm|Q6N092|Q6N092_HUMAN	Hypothetical protein DKFZp686K18196 (Fragment)	6	0.909	3	0.637	-1.155	0.15
2 59	trm|Q6N030|Q6N030_HUMAN	Hypothetical protein DKFZp686I15212	0		0
2 6	trm|Q6P5S8|Q6P5S8_HUMAN	Hypothetical protein	4	1.165	4	0.828	-1.577	0.1
2 66	trm|Q6S380|Q6S380_HUMAN	Plectin 6	0		2	2.494
2 69	trm|Q5EK51|Q5EK51_HUMAN	Lactoferrin	2	1.009	4	1.684
2 71	trm|Q6ZQN2|Q6ZQN2_HUMAN	CDNA FLJ46846 fis, clone UTERU3004635, moderately similar to Neuroblast differentiation associated protein AHNAK. (Fragment)	8	0.921	7	0.78	-1.819	0.05
2 81	spt|Q9Y678|COPG_HUMAN	Coatomer subunit gamma (Gamma-coat protein) (Gamma-COP)	1	1.068	2	0.905
2 82	trm|Q569H3|Q569H3_HUMAN spt|Q9UL25|RAB21_HUMAN	RAB21, member RAS oncogene family (Hypothetical protein RAB21) Ras-related protein Rab-21	1	0.845	2	1.012
2 89	spt|Q8IY37|DHX37_HUMAN	Probable ATP-dependent RNA helicase DHX37 (EC 3.6.1.-) (DEAH box protein 37)	0		0
2 96	spt|Q9Y2H0|DLGP4_HUMAN	Disks large-associated protein 4 (DAP-4) (SAP90/PSD-95-associated protein 4) (SAPAP4) (PSD-95/SAP90-binding protein 4)	1	0.733	2	0.447
20 105	spt|P60763|RAC3_HUMAN	Ras-related C3 botulinum toxin substrate 3 (p21-Rac3)	6	1.036	6	1.205	1.579	0.1
20 109	trm|Q5T7C6|Q5T7C6_HUMAN	High-mobility group box 1 (Fragment)	4	0.965	2	0.779
20 137	trm|Q2TU88|Q2TU88_HUMAN	Growth-inhibiting protein 24	5	0.955	2	1.063
20 164	spt|P0C0S5|H2AZ_HUMAN spt|Q71UI9|H2AV_HUMAN	Histone H2A.Z (H2A/z) Histone H2AV (H2A.F/Z)	1	0.732	2	0.877
20 180	spt|Q9NZ08|ARTS1_HUMAN	Adipocyte-derived leucine aminopeptidase precursor (EC 3.4.11.-) (A- LAP) (ARTS-1) (Aminopeptidase PILS) (Puromycin-insensitive leucyl- specific aminopeptidase) (PILS-AP) (Type 1 tumor necrosis factor receptor shedding aminopeptidase regulator)	3	1.042	0
20 198	trm|Q6N0B1|Q6N0B1_HUMAN spt|Q9P2R7|SUCB1_HUMAN trm|Q5T9Q6|Q5T9Q6_HUMAN	Hypothetical protein DKFZp686D0880 (Fragment) "Succinyl-CoA ligase [ADP-forming] beta-chain, mitochondrial precursor (EC 6.2.1.5) (Succinyl-CoA synthetase, betaA chain) (SCS-betaA) (ATP- specific succinyl-CoA synthetase subunit beta) (NY-REN-39 antigen) " "Succinate-CoA ligase, ADP-forming, beta subunit "	3	1.599	0
20 205	trm|Q4F786|Q4F786_HUMAN	Hemoglobin delta Etolia variant (Fragment)	3	0.83	0
20 206	trm|Q96SA9|Q96SA9_HUMAN	Anti-streptococcal/anti-myosin immunoglobulin kappa light chain variable region (Fragment)	3	1.221	0
20 217	spt|O14558|HSPB6_HUMAN	Heat-shock protein beta-6 (HspB6) (Heat-shock 20 kDa-like protein p20)	3	1.091	0
20 220	spt|P50135|HNMT_HUMAN	Histamine N-methyltransferase (EC 2.1.1.8) (HMT)	0		0
20 225	spt|P48681|NEST_HUMAN	Nestin	3	0.992	0
20 241	trm|Q6ZP37|Q6ZP37_HUMAN spt|P51570|GALK1_HUMAN	CDNA FLJ26554 fis, clone LNF01773, highly similar to Galactokinase (EC 2.7.1.6) Galactokinase (EC 2.7.1.6) (Galactose kinase)	3	1.206	0
20 242	trm|Q53EQ0|Q53EQ0_HUMAN trm|Q6PAU9|Q6PAU9_HUMAN	Kininogen 1 variant (Fragment) Kininogen 1	3	0.782	0
20 259	spt|Q53GG5|PDLI3_HUMAN	PDZ and LIM domain protein 3 (Actinin-associated LIM protein) (Alpha- actinin-2-associated LIM protein)	2	1.848	0
20 263	spt|P22307|NLTP_HUMAN	Nonspecific lipid-transfer protein (EC 2.3.1.176) (Propanoyl-CoA C- acyltransferase) (NSL-TP) (Sterol carrier protein 2) (SCP-2) (Sterol carrier protein X) (SCP-X) (SCP-chi) (SCPX)	3	0.932	0
20 284	spt|Q96SL4|GPX7_HUMAN	Glutathione peroxidase 7 precursor (EC 1.11.1.9) (CL683)	3	1.157	0
20 293	trm|Q59EK0|Q59EK0_HUMAN	Epsilon isoform of regulatory subunit B56, protein phosphatase 2A variant (Fragment)	3	0.96	0
20 297	trm|Q7KZS0|Q7KZS0_HUMAN trm|Q59GX1|Q59GX1_HUMAN spt|P63279|UBC9_HUMAN	Ubiquitin-conjugating enzyme E2I (UBC9 homolog, yeast) Ubiquitin-conjugating enzyme E2I variant (Fragment) SUMO-1-conjugating enzyme UBC9 (EC 6.3.2.19) (SUMO-1-protein ligase) (Ubiquitin-conjugating enzyme E2 I) (Ubiquitin-protein ligase I) (Ubiquitin carrier protein I) (Ubiquitin carrier protein 9) (p18)	3	0.878	0
20 299	trm|Q96LZ8|Q96LZ8_HUMAN	CDNA FLJ32951 fis, clone TESTI2008033	3	0.902	0
20 302	trm|Q8IZC6|Q8IZC6_HUMAN	Collagen XXVII proalpha 1 chain precursor (OTTHUMP00000021970)	3	0.951	0
20 307	trm|Q96S08|Q96S08_HUMAN	Some homology with holliday junction DNA helicase RUVB like	3	1.016	0
20 316	trm|Q2QD09|Q2QD09_HUMAN	RcTPI1 (Fragment)	1	0.833	0
20 77	trm|Q8IXW6|Q8IXW6_HUMAN	Dihydropyrimidinase-like 3	3	1.114	0
21 11	trm|Q53GC9|Q53GC9_HUMAN	Transgelin variant (Fragment)	8	0.734	7	0.719	-0.062	1
21 165	spt|P29777|GNAO2_HUMAN spt|P09471|GNAO1_HUMAN trm|Q8N6I9|Q8N6I9_HUMAN	Guanine nucleotide-binding protein G(o) subunit alpha 2 Guanine nucleotide-binding protein G(o) subunit alpha 1 GNAO1 protein	0		0
21 168	spt|Q13509|TBB3_HUMAN	Tubulin beta-3 chain (Tubulin beta-III) (Tubulin beta-4)	3	1.059	0
21 183	spt|Q86UQ4|ABCAD_HUMAN	ATP-binding cassette sub-family A member 13	3	1.012	0
21 210	spt|Q92922|SMRC1_HUMAN trm|Q17RS0|Q17RS0_HUMAN trm|Q58EY4|Q58EY4_HUMAN	SWI/SNF-related matrix-associated actin-dependent regulator of chromatin subfamily C member 1 (SWI/SNF complex 155 kDa subunit) (BRG1-associated factor 155) "SWI/SNF related, matrix associated, actin dependent regulator of chromatin, subfamily c, member 1 " "SWI/SNF related, matrix associated, actin dependent regulator of chromatin, subfamily c, member 1 "	3	1.359	0
21 213	trm|Q6UUV8|Q6UUV8_HUMAN trm|Q5T4K5|Q5T4K5_HUMAN trm|Q53ET0|Q53ET0_HUMAN trm|Q7Z3X7|Q7Z3X7_HUMAN	Transducer of regulated CREB protein 2 Transducer of regulated cAMP response element-binding protein (CREB) 2 (TORC2) Hypothetical protein (Fragment) CREB regulated transcription coactivator 2 (Transducer of regulated cAMP response element-binding protein (CREB) 2) (TORC2)	3	1.256	0
21 232	trm|Q6NVY1|Q6NVY1_HUMAN trm|Q53TC6|Q53TC6_HUMAN trm|Q9BS94|Q9BS94_HUMAN trm|Q53GA8|Q53GA8_HUMAN trm|Q53GF2|Q53GF2_HUMAN trm|Q92931|Q92931_HUMAN	3-hydroxyisobutyryl-Coenzyme A hydrolase Hypothetical protein HIBCH (Fragment) HIBCH protein (Fragment) 3-hydroxyisobutyryl-Coenzyme A hydrolase isoform 1 variant (Fragment) 3-hydroxyisobutyryl-Coenzyme A hydrolase isoform 1 variant (Fragment) 3-hydroxyisobutyryl-coenzyme A hydrolase	3	1.313	0
21 25	trm|Q9NTK6|Q9NTK6_HUMAN	Hypothetical protein DKFZp761K0511	7	0.999	8	0.999	0.003	1
21 265	spt|P05413|FABPH_HUMAN trm|Q6IBD7|Q6IBD7_HUMAN	Fatty acid-binding protein, heart (H-FABP) (Heart-type fatty acid- binding protein) (Muscle fatty acid-binding protein) (M-FABP) (Mammary-derived growth inhibitor) (MDGI) FABP3 protein	3	0.991	0
21 280	trm|Q5T2M3|Q5T2M3_HUMAN trm|Q5T2M4|Q5T2M4_HUMAN trm|Q5TG00|Q5TG00_HUMAN trm|Q96JB1|Q96JB1_HUMAN	OTTHUMP00000017872 (Fragment) OTTHUMP00000017873 (Fragment) OTTHUMP00000017871 Axonemal dynein heavy chain 8	3	0.886	0
21 289	trm|Q9UQ28|Q9UQ28_HUMAN spt|O75385|ULK1_HUMAN	KIAA0722 protein (Fragment) Serine/threonine-protein kinase ULK1 (EC 2.7.11.1) (Unc-51-like kinase 1)	3	0.704	0
21 294	trm|Q8WXI7|Q8WXI7_HUMAN	Ovarian cancer related tumor marker CA125	3	1.205	0
21 299	spt|O75038|PLCL4_HUMAN	1-phosphatidylinositol-4,5-bisphosphate phosphodiesterase-like 4 (EC 3.1.4.11) (Phosphoinositide phospholipase C-like 4) (Phospholipase C-like 4) (Fragment)	3	1.018	0
21 300	trm|Q8N239|Q8N239_HUMAN	CDNA FLJ34960 fis, clone NTONG2003515 (Hypothetical protein RP11- 450P7.3) (Novel protein)	3	0.899	0
21 301	spt|P06401|PRGR_HUMAN trm|Q8NG45|Q8NG45_HUMAN trm|Q8NG43|Q8NG43_HUMAN trm|Q8NG42|Q8NG42_HUMAN trm|Q8TDS3|Q8TDS3_HUMAN trm|Q8NG44|Q8NG44_HUMAN	Progesterone receptor (PR) Progesterone receptor Delta4+6/2 progesterone receptor Delta 6/2 progesterone receptor Delta 4 progesterone receptor Delta 3+6/2 progesterone receptor	3	1.329	0
21 306	spt|O00584|RNT2_HUMAN	Ribonuclease T2 precursor (EC 3.1.27.-) (Ribonuclease 6)	3	1.037	0
21 310	trm|Q5VYV7|Q5VYV7_HUMAN	OTTHUMP00000030279	3	0.914	0
21 312	spt|Q12872|SFRS8_HUMAN	Splicing factor, arginine/serine-rich 8 (Suppressor of white apricot protein homolog)	3	0.881	0
21 313	trm|Q9Y2H2|Q9Y2H2_HUMAN trm|Q5W136|Q5W136_HUMAN trm|Q2T9J4|Q2T9J4_HUMAN trm|Q9NT51|Q9NT51_HUMAN	KIAA0966 protein (Fragment) Inositol polyphosphate-5-phosphatase F Inositol polyphosphate-5-phosphatase F Hypothetical protein DKFZp434P1818 (Fragment)	2	1.491	0
21 319	spt|O95714|HERC2_HUMAN	HECT domain and RCC1-like domain-containing protein 2	3	0.851	0
21 320	trm|Q53GU8|Q53GU8_HUMAN spt|Q15582|BGH3_HUMAN trm|Q49AT7|Q49AT7_HUMAN	Transforming growth factor, beta-induced, 68kDa variant (Fragment) Transforming growth factor-beta-induced protein ig-h3 precursor (Beta ig-h3) (Kerato-epithelin) (RGD-containing collagen-associated protein) (RGD-CAP) TGFBI protein	3	1.324	0
21 325	trm|Q56G89|Q56G89_HUMAN	Serum albumin	6	0.949	6	0.593	-2.455	0.025
21 66	spt|P01859|IGHG2_HUMAN	Ig gamma-2 chain C region	0		0
21 74	trm|Q96K68|Q96K68_HUMAN	CDNA FLJ14473 fis, clone MAMMA1001080, highly similar to Homo sapiens SNC73 protein (SNC73) mRNA	4	0.887	2	0.726
3 107	trm|Q5VZA9|Q5VZA9_HUMAN	Collagen, type IV, alpha 2	1	0.972	2	1.123
3 119	spt|P78527|PRKDC_HUMAN	DNA-dependent protein kinase catalytic subunit (EC 2.7.11.1) (DNA-PK catalytic subunit) (DNA-PKcs) (DNPK1) (p460)	2	0.963	4	0.936
3 126	trm|Q86VG2|Q86VG2_HUMAN	Splicing factor proline/glutamine-rich (Polypyrimidine tract binding protein associated)	3	1.018	9	1.228	0.943	0.2
3 135	spt|Q8TBA6|GOGA5_HUMAN	Golgin subfamily A member 5 (Golgin-84) (RET-fused gene 5 protein) (Ret-II protein)	0		2	0.974
3 137	trm|Q2TUW9|Q2TUW9_HUMAN	Lactoferrin	3	1.14	3	2.553	2.552	0.05
3 138	trm|Q6ZS46|Q6ZS46_HUMAN	CDNA FLJ45840 fis, clone NTONG2004829	1	0.686	2	0.797
3 145	trm|Q8N707|Q8N707_HUMAN	CTTN protein	5	0.949	4	1.028	0.641	1
3 148	trm|Q5TAT6|Q5TAT6_HUMAN trm|Q5TAT5|Q5TAT5_HUMAN trm|Q5TAT4|Q5TAT4_HUMAN	Collagen, type XIII, alpha 1 "Collagen, type XIII, alpha 1 (Fragment) " "Collagen, type XIII, alpha 1 "	1	0.88	2	0.837
3 153	trm|Q7Z4X1|Q7Z4X1_HUMAN trm|Q5BJF8|Q5BJF8_HUMAN trm|Q32LY9|Q32LY9_HUMAN	Cytoplasmic dynein intermediate chain 2C "DYNC1I2 protein (Hypothetical protein DYNC1I2) (Hypothetical protein DKFZp686O1459) (Dynein, cytoplasmic, intermediate polypeptide 2) " DYNC1I2 protein	5	1.001	10	1.073	0.443	1
3 162	trm|Q75T46|Q75T46_HUMAN	SNAP-25-interacting protein	1	0.89	2	0.92
3 163	spt|O43524|FOXO3_HUMAN	Forkhead box protein O3A (Forkhead in rhabdomyosarcoma-like 1) (AF6q21 protein)	0		0
3 165	spt|P15924|DESP_HUMAN	Desmoplakin (DP) (250/210 kDa paraneoplastic pemphigus antigen)	1	1.136	2	0.796
3 170	trm|Q5T6S7|Q5T6S7_HUMAN	OTTHUMP00000018488 (Fragment)	0		0
3 172	trm|O75944|O75944_HUMAN	Aconitase (Fragment)	1	1.365	2	1.092
3 173	trm|Q96DG6|Q96DG6_HUMAN trm|Q8TED6|Q8TED6_HUMAN	Carboxymethylenebutenolidase homolog (Pseudomonas) (Hypothetical protein) "CDNA FLJ23617 fis, clone ADKA03332 "	1	0.808	2	1.141
3 181	trm|Q6NZ54|Q6NZ54_HUMAN spt|P18621|RL17_HUMAN	Ribosomal protein L17 60S ribosomal protein L17 (L23)	1	0.887	2	1.874
3 182	trm|Q6FHP2|Q6FHP2_HUMAN trm|Q53F60|Q53F60_HUMAN spt|O75828|DHC3_HUMAN	CBR3 protein (Carbonyl reductase 3) (NADPH-dependent carbonyl reductase 3) (Fragment) Carbonyl reductase 3 variant (Fragment) Carbonyl reductase [NADPH] 3 (EC 1.1.1.184) (NADPH-dependent carbonyl reductase 3)	3	1.09	6	1.008	-0.436	1
3 187	trm|Q96G29|Q96G29_HUMAN spt|P14324|FPPS_HUMAN	Farnesyl diphosphate synthase (Farnesyl pyrophosphate synthetase, dimethylallyltranstransferase, geranyltranstransferase) Farnesyl pyrophosphate synthetase (FPP synthetase) (FPS) (Farnesyl diphosphate synthetase) [Includes: Dimethylallyltranstransferase (EC 2.5.1.1); Geranyltranstransferase (EC 2.5.1.10)]	1	1.24	2	1.912
3 189	spt|Q03591|FHR1_HUMAN	Complement factor H-related protein 1 precursor (FHR-1) (H factor-like protein 1) (H-factor-like 1) (H36)	1	0.755	2	0.724
3 192	spt|P49913|CAMP_HUMAN	Cathelicidin antimicrobial peptide precursor (18 kDa cationic antimicrobial protein) (CAP-18) (hCAP-18) [Contains: Antibacterial protein FALL-39 (FALL-39 peptide antibiotic); Antibacterial protein LL-37]	0		2	6.351
3 196	spt|Q9Y5S9|RBM8A_HUMAN	RNA-binding protein 8A (RNA-binding motif protein 8A) (Ribonucleoprotein RBM8A) (RNA-binding protein Y14) (Binder of OVCA1- 1) (BOV-1)	0		0
3 198	trm|Q5JXB2|Q5JXB2_HUMAN	Ubiquitin-conjugating enzyme E2N-like	1	0.854	2	1.13
3 199	trm|Q53X83|Q53X83_HUMAN spt|P36405|ARL3_HUMAN	ARL3 protein (Fragment) ADP-ribosylation factor-like protein 3	3	1.021	6	1.09	0.221	1
3 201	spt|Q9H9B1|EHMT1_HUMAN	Histone-lysine N-methyltransferase, H3 lysine-9 specific 5 (EC 2.1.1.43) (Histone H3-K9 methyltransferase 5) (H3-K9-HMTase 5) (Euchromatic histone-lysine N-methyltransferase 1) (Eu-HMTase1) (G9a- like protein 1) (GLP1)	3	2.061	3	0.955	-3.312	0.025
3 203	trm|Q8N443|Q8N443_HUMAN	RIB43A domain with coiled-coils 1	1	0.681	2	1.022
3 207	trm|Q9BS35|Q9BS35_HUMAN spt|P60983|GMFB_HUMAN	GMFB protein (Glia maturation factor, beta) Glia maturation factor beta (GMF-beta)	1	0.858	2	1.668
3 211	spt|Q02818|NUCB1_HUMAN trm|Q53GX6|Q53GX6_HUMAN trm|Q96BA4|Q96BA4_HUMAN	Nucleobindin-1 precursor (CALNUC) Nucleobindin 1 variant (Fragment) NUCB1 protein	3	1.194	3	1.079	-1.206	0.15
3 213	spt|Q9NUV9|GIMA4_HUMAN	GTPase, IMAP family member 4 (Immunity-associated protein 4) (Immunity-associated nucleotide 1 protein) (hIAN1)	1	1.196	2	1.939
3 216	trm|Q5RLJ0|Q5RLJ0_HUMAN spt|Q9Y224|CN166_HUMAN	CLE Protein C14orf166	0		0
3 222	spt|Q9NX24|NOLA2_HUMAN	H/ACA ribonucleoprotein complex subunit 2 (Nucleolar protein family A member 2) (snoRNP protein NHP2)	1	0.562	2	2.03
3 223	spt|Q9Y2S6|CCD72_HUMAN	Coiled-coil domain-containing protein 72	1	0.777	2	1.162
3 227	spt|Q7Z3Z4|PIWL4_HUMAN	Piwi-like protein 4	0		0
3 229	trm|Q6PJM5|Q6PJM5_HUMAN	CALD1 protein (Fragment)	2	0.876	3	0.912
3 233	spt|Q8NCW0|KREM2_HUMAN trm|Q53F67|Q53F67_HUMAN	Kremen protein 2 precursor (Kringle-containing protein marking the eye and the nose) (Kringle domain-containing transmembrane protein 2) (Dickkopf receptor 2) Kringle-containing transmembrane protein 2 isoform b variant (Fragment)	0		0
3 238	trm|Q9H2T8|Q9H2T8_HUMAN spt|Q13363|CTBP1_HUMAN trm|Q7Z2Q5|Q7Z2Q5_HUMAN trm|Q4KMQ8|Q4KMQ8_HUMAN spt|P56545|CTBP2_HUMAN trm|Q5SQP7|Q5SQP7_HUMAN trm|Q5SQP8|Q5SQP8_HUMAN trm|Q8IY44|Q8IY44_HUMAN trm|Q86SV0|Q86SV0_HUMAN	Ribeye C-terminal-binding protein 1 (EC 1.1.1.-) (CtBP1) C-terminal binding protein 1 C-terminal binding protein 1 C-terminal-binding protein 2 (CtBP2) C-terminal binding protein 2 C-terminal binding protein 2 CTBP2 protein CTBP2 protein	1	0.249	2	0.507
3 239	trm|Q9P2Q1|Q9P2Q1_HUMAN	KIAA1295 protein (Fragment)	1	1.219	2	1.036
3 242	trm|Q53XZ9|Q53XZ9_HUMAN spt|P26440|IVD_HUMAN	Isovaleryl Coenzyme A dehydrogenase "Isovaleryl-CoA dehydrogenase, mitochondrial precursor (EC 1.3.99.10) (IVD) "	0		2	0.713
3 245	trm|Q5T8U3|Q5T8U3_HUMAN	Ribosomal protein L7a (Fragment)	1	0.622	2	1.254
3 250	trm|Q7Z7M7|Q7Z7M7_HUMAN spt|P04179|SODM_HUMAN trm|Q7Z7M6|Q7Z7M6_HUMAN trm|Q7Z7M4|Q7Z7M4_HUMAN trm|Q4ZJI1|Q4ZJI1_HUMAN trm|Q0JUU7|Q0JUU7_HUMAN	Manganese-containing superoxide dismutase (Fragment) "Superoxide dismutase [Mn], mitochondrial precursor (EC 1.15.1.1) " Manganese-containing superoxide dismutase (Fragment) Manganese-containing superoxide dismutase (Fragment) Manganese-containing superoxide dismutase (Fragment) Hypothetical protein SOD2 (Fragment)	6	0.994	3	0.905	-0.903	0.2
3 259	trm|Q6P2D7|Q6P2D7_HUMAN	HNRPM protein (Fragment)	2	0.976	4	0.627
3 264	trm|Q3SY90|Q3SY90_HUMAN	Transcription elongation factor B polypeptide 3B (Elongin A2)	0		0
3 267	trm|O75526|O75526_HUMAN trm|Q6PEZ2|Q6PEZ2_HUMAN	Testes specific heterogenous nuclear ribonucleoprotein G-T Testes-specific heterogenous nuclear ribonucleoprotein G-T	0		0
3 269	spt|Q9Y6R0|NUMBL_HUMAN	Numb-like protein (Numb-R)	1	0.929	2	0.787
3 270	trm|Q8NIA4|Q8NIA4_HUMAN	Calcium/calmodulin-dependent protein kinase II gamma (Fragment)	0		0
3 273	trm|Q496M4|Q496M4_HUMAN spt|Q86YT9|JAML1_HUMAN trm|Q496M2|Q496M2_HUMAN trm|Q496M1|Q496M1_HUMAN trm|Q496M3|Q496M3_HUMAN	AMICA1 protein Junctional adhesion molecule-like precursor (Dendritic cell-specific protein CREA7-1) (Adhesion molecule interacting with CXADR antigen 1) AMICA1 protein AMICA1 protein AMICA1 protein	1	0.936	2	0.526
3 275	spt|Q12769|NU160_HUMAN	Nuclear pore complex protein Nup160 (Nucleoporin Nup160) (160 kDa nucleoporin)	0		2	1.405
3 278	spt|Q9BX26|SYCP2_HUMAN	Synaptonemal complex protein 2 (SCP-2) (Synaptonemal complex lateral element protein) (hsSCP2)	1	0.948	2	0.659
3 282	trm|Q59G60|Q59G60_HUMAN	DHX57 protein variant (Fragment)	1	0.879	2	0.666
3 286	trm|Q5T9C4|Q5T9C4_HUMAN trm|Q5U601|Q5U601_HUMAN	OTTHUMP00000022210 Hypothetical protein	1	1.05	2	0.891
3 288	spt|Q86V81|THOC4_HUMAN	THO complex subunit 4 (Tho4) (Ally of AML-1 and LEF-1) (Transcriptional coactivator Aly/REF) (bZIP-enhancing factor BEF)	4	0.945	10	1.103	1.002	0.2
3 289	trm|Q0P5U9|Q0P5U9_HUMAN	HCF-binding transcription factor Zhangfei	0		0
3 292	spt|Q9UBV7|B4GT7_HUMAN	Beta-1,4-galactosyltransferase 7 (EC 2.4.1.-) (Beta-1,4-GalTase 7) (Beta4Gal-T7) (b4Gal-T7) (UDP-galactose:beta-N-acetylglucosamine beta- 1,4-galactosyltransferase 7) (UDP-Gal:beta-GlcNAc beta-1,4- galactosyltransferase 7) [Includes: Xylosylprotein 4-beta- galactosyltransferase (EC 2.4.1.133) (UDP-galactose:beta-xylose beta- 1,4-galactosyltransferase) (Xylosylprotein beta-1,4- galactosyltransfera…	0		0
3 293	spt|Q10570|CPSF1_HUMAN	Cleavage and polyadenylation specificity factor 160 kDa subunit (CPSF 160 kDa subunit)	0		0
3 294	trm|Q8IV77|Q8IV77_HUMAN	CNGA4 protein (Fragment)	0		0
3 295	trm|Q9UGL4|Q9UGL4_HUMAN trm|Q5VU85|Q5VU85_HUMAN	NICE-4 protein (Fragment) Ubiquitin associated protein 2-like (Fragment)	0		0
3 298	trm|Q6ICS6|Q6ICS6_HUMAN spt|P25787|PSA2_HUMAN trm|Q53GF5|Q53GF5_HUMAN	Proteasome subunit alpha type (EC 3.4.25.1) (Fragment) Proteasome subunit alpha type 2 (EC 3.4.25.1) (Proteasome component C3) (Macropain subunit C3) (Multicatalytic endopeptidase complex subunit C3) Proteasome alpha 2 subunit variant (Fragment)	5	0.804	4	1.133	2.814	0.025
3 30	trm|Q8N5F4|Q8N5F4_HUMAN trm|Q8TBC9|Q8TBC9_HUMAN	IGLC1 protein IGLV3-25 protein	8	0.907	10	0.718	-1.674	0.1
3 300	trm|Q9Y4F5|Q9Y4F5_HUMAN	KIAA0284 protein (Fragment)	1	0.802	2	1.096
3 301	spt|P12111|CO6A3_HUMAN	Collagen alpha-3(VI) chain precursor	2	1.159	4	0.81
3 302	spt|Q05193|DYN1_HUMAN trm|Q5SYX2|Q5SYX2_HUMAN trm|Q6P3T6|Q6P3T6_HUMAN trm|Q86VD2|Q86VD2_HUMAN	Dynamin-1 (EC 3.6.5.5) Dynamin 1 Dynamin 1 Dynamin 1	2	1.224	4	1.241
3 303	trm|Q5VV70|Q5VV70_HUMAN spt|Q14978|NOLC1_HUMAN trm|Q9BUV3|Q9BUV3_HUMAN	Nucleolar and coiled-body phosphoprotein 1 Nucleolar phosphoprotein p130 (Nucleolar 130 kDa protein) (140 kDa nucleolar phosphoprotein) (Nopp140) (Nucleolar and coiled-body phosphoprotein 1) Nucleolar and coiled-body phosphoprotein 1 (HCV NS5A trans-regulated protein 13)	0		2	0.999
3 304	trm|Q8NDL6|Q8NDL6_HUMAN	Hypothetical protein DKFZp434I2435 (Fragment)	1	1.65	2	0.96
3 307	spt|Q9UQ35|SRRM2_HUMAN	Serine/arginine repetitive matrix protein 2 (Serine/arginine-rich splicing factor-related nuclear matrix protein of 300 kDa) (Ser/Arg- related nuclear matrix protein) (SR-related nuclear matrix protein of 300 kDa) (Splicing coactivator subunit SRm300) (300 kDa nuclear matrix antigen)	5	0.979	4	0.878	-0.764	0.25
3 311	trm|Q59F85|Q59F85_HUMAN	Glucose phosphate isomerase variant (Fragment)	0		0
3 312	spt|Q9Y625|GPC6_HUMAN	Glypican-6 precursor	0		0
3 315	spt|P35527|K1C9_HUMAN	Keratin, type I cytoskeletal 9 (Cytokeratin-9) (CK-9) (Keratin-9) (K9)	2	2.02	4	0.882
3 316	spt|Q96CK0|ZN653_HUMAN	Zinc finger protein 653 (67 kDa zinc finger protein) (Zinc finger protein Zip67)	1	0.925	2	1.023
3 318	trm|Q8NBP2|Q8NBP2_HUMAN trm|Q3SY77|Q3SY77_HUMAN trm|Q6UXC4|Q6UXC4_HUMAN	CDNA PSEC0073 fis, clone NT2RP2002934, weakly similar to UDP- GLUCURONOSYLTRANSFERASE 2C1 MICROSOMAL (EC 2.4.1.17) "UDP glycosyltransferase 3 family, polypeptide A2 " Glucuronosyltransferase	0		0
3 43	trm|Q6LC01|Q6LC01_HUMAN	MRNA encoding beta-tubulin. (from clone D-beta-1) (Fragment)	1	0.817	2	0.838
3 48	trm|Q5SZ07|Q5SZ07_HUMAN	Hepatoma-derived growth factor (High-mobility group protein 1- like)	8	0.959	7	1.145	1.734	0.1
3 61	trm|Q3BDU5|Q3BDU5_HUMAN	Rhabdomyosarcoma antigen MU-RMS-40.12	2	0.92	4	0.78
3 74	trm|Q53S91|Q53S91_HUMAN spt|P02461|CO3A1_HUMAN	Hypothetical protein COL3A1 Collagen alpha-1(III) chain precursor	3	0.894	6	0.661	-1.449	0.1
3 8	trm|Q6PJF1|Q6PJF1_HUMAN	Hypothetical protein	5	0.927	6	0.974	0.292	1
3 91	spt|Q9BUT1|BDH2_HUMAN	3-hydroxybutyrate dehydrogenase type 2 (EC 1.1.1.30) (R-beta- hydroxybutyrate dehydrogenase) (Dehydrogenase/reductase SDR family member 6) (Oxidoreductase UCPA)	3	1.014	3	0.867	-1.041	0.2
3 97	trm|Q6GPH3|Q6GPH3_HUMAN trm|Q5TEU4|Q5TEU4_HUMAN	Chromosome 20 open reading frame 7 Chromosome 20 open reading frame 7	1	0.614	2	0.951
4 100	spt|P29966|MARCS_HUMAN	Myristoylated alanine-rich C-kinase substrate (MARCKS) (Protein kinase C substrate, 80 kDa protein, light chain) (PKCSL) (80K-L protein)	6	1.081	5	0.646	-6.031	0
4 105	trm|Q5T7C5|Q5T7C5_HUMAN trm|Q14321|Q14321_HUMAN trm|Q5T7C3|Q5T7C3_HUMAN spt|P09429|HMGB1_HUMAN spt|Q9UGV6|HMG1X_HUMAN	High-mobility group box 1 (Fragment) HMG-1 High-mobility group box 1 High mobility group protein B1 (High mobility group protein 1) (HMG- 1) High mobility group protein 1-like 10 (HMG-1L10)	9	0.994	8	0.897	-0.714	0.25
4 123	trm|Q5T539|Q5T539_HUMAN spt|P02763|A1AG1_HUMAN	Orosomucoid 1 Alpha-1-acid glycoprotein 1 precursor (AGP 1) (Orosomucoid-1) (OMD 1)	6	1.06	3	0.58	-1.565	0.1
4 125	spt|P51858|HDGF_HUMAN	Hepatoma-derived growth factor (HDGF) (High-mobility group protein 1- like 2) (HMG-1L2)	1	1.13	2	1.234
4 133	spt|Q15819|UB2V2_HUMAN	Ubiquitin-conjugating enzyme E2 variant 2 (MMS2) (Enterocyte differentiation-associated factor EDAF-1) (Enterocyte differentiation- promoting factor) (EDPF-1) (Vitamin D3-inducible protein) (DDVit 1)	3	0.993	3	1.017	0.185	1
4 135	spt|P02042|HBD_HUMAN	Hemoglobin subunit delta (Hemoglobin delta chain) (Delta-globin)	7	0.88	4	0.931	0.189	1
4 138	spt|Q15293|RCN1_HUMAN	Reticulocalbin-1 precursor	6	0.996	3	1.142	1.019	0.2
4 142	spt|P13645|K1C10_HUMAN	Keratin, type I cytoskeletal 10 (Cytokeratin-10) (CK-10) (Keratin-10) (K10)	1	1.198	2	0.645
4 144	spt|P67809|YBOX1_HUMAN	Nuclease sensitive element-binding protein 1 (Y-box-binding protein 1) (Y-box transcription factor) (YB-1) (CCAAT-binding transcription factor I subunit A) (CBF-A) (Enhancer factor I subunit A) (EFI-A) (DNA-binding protein B) (DBPB)	1	1.034	2	2.183
4 148	trm|Q6NS96|Q6NS96_HUMAN	IGLV3-21 protein	1	1.172	2	0.188
4 150	trm|Q59EM9|Q59EM9_HUMAN	Ubiquitin C variant (Fragment)	6	0.918	3	1.041	0.78	0.25
4 156	spt|P42166|LAP2A_HUMAN	Lamina-associated polypeptide 2 isoform alpha (Thymopoietin isoform alpha) (TP alpha) (Thymopoietin-related peptide isoform alpha) (TPRP isoform alpha) [Contains: Thymopoietin (TP) (Splenin); Thymopentin (TP5)]	5	0.823	6	1.229	2.617	0.025
4 164	spt|P07029|HNRU2_HUMAN	Heterogeneous nuclear ribonucleoprotein UP2 (Fragment)	3	0.922	6	1.099	1.625	0.1
4 172	spt|Q6NZI2|PTRF_HUMAN	Polymerase I and transcript release factor (PTRF protein)	4	0.971	2	0.866
4 179	spt|P07203|GPX1_HUMAN	Glutathione peroxidase 1 (EC 1.11.1.9) (GSHPx-1) (GPx-1) (Cellular glutathione peroxidase)	6	0.849	3	1.254	4.488	0.002
4 180	trm|Q0VGD5|Q0VGD5_HUMAN spt|P05204|HMGN2_HUMAN	High-mobility group nucleosomal binding domain 2 Nonhistone chromosomal protein HMG-17 (High-mobility group nucleosome- binding domain-containing protein 2)	2	0.928	4	1.087
4 186	trm|Q6NW22|Q6NW22_HUMAN	PGM1 protein (Fragment)	4	1.004	4	1.063	1.097	0.2
4 191	trm|Q9UFZ5|Q9UFZ5_HUMAN spt|Q16643|DREB_HUMAN	Hypothetical protein DKFZp434D064 (Hypothetical protein DBN1) Drebrin (Developmentally-regulated brain protein)	0		0
4 198	trm|Q3ZCU9|Q3ZCU9_HUMAN	STIP1 protein	5	0.779	7	0.921	1.236	0.15
4 201	spt|P33176|KINH_HUMAN	Kinesin heavy chain (Ubiquitous kinesin heavy chain) (UKHC)	2	1.005	3	0.994
4 202	trm|Q561W4|Q561W4_HUMAN trm|Q5TIF1|Q5TIF1_HUMAN trm|Q38J66|Q38J66_HUMAN spt|Q12972|PP1R8_HUMAN	Protein phosphatase 1, regulatory (Inhibitor) subunit 8 "Protein phosphatase 1, regulatory (Inhibitor) subunit 8 " Protein phosphatase 1 regulatory subunit 8 testis splice variant (Fragment) Nuclear inhibitor of protein phosphatase 1 (NIPP-1) (Protein phosphatase 1 regulatory inhibitor subunit 8) [Includes: Activator of RNA decay (EC 3.1.4.-) (ARD-1)]	0		1	5.978
4 203	trm|Q6ICS0|Q6ICS0_HUMAN trm|Q59EP1|Q59EP1_HUMAN spt|P50995|ANX11_HUMAN	ANXA11 protein (Annexin A11 variant) (Annexin A11) (Fragment) Annexin A11 variant (Fragment) Annexin A11 (Annexin XI) (Calcyclin-associated annexin 50) (CAP-50) (56 kDa autoantigen)	1	1.245	2	1.736
4 214	trm|Q6FGL0|Q6FGL0_HUMAN trm|Q59FR8|Q59FR8_HUMAN trm|Q6IBA7|Q6IBA7_HUMAN spt|P17931|LEG3_HUMAN trm|Q86TY5|Q86TY5_HUMAN	LGALS3 protein (Fragment) LGALS3 protein variant (Fragment) LGALS3 protein Galectin-3 (Galactose-specific lectin 3) (Mac-2 antigen) (IgE-binding protein) (35 kDa lectin) (Carbohydrate-binding protein 35) (CBP 35) (Laminin-binding protein) (Lectin L-29) (L-31) (Galactoside-binding protein) (GALBP) Full-length cDNA clone CS0DI041YE05 of Placenta of Homo sapiens (human)	9	0.962	8	1.17	2.076	0.05
4 216	trm|Q5JXA5|Q5JXA5_HUMAN trm|Q53FE8|Q53FE8_HUMAN spt|Q9UNZ2|NSF1C_HUMAN	OTTHUMP00000029976 P47 protein isoform a variant (Fragment) NSFL1 cofactor p47 (p97 cofactor p47)	1	0.989	2	2.159
4 219	spt|P54652|HSP72_HUMAN	Heat shock-related 70 kDa protein 2 (Heat shock 70 kDa protein 2)	1	0.943	2	0.945
4 221	spt|Q969E4|TCAL3_HUMAN	Transcription elongation factor A protein-like 3 (TCEA-like protein 3) (Transcription elongation factor S-II protein-like 3)	1	1.021	2	0.958
4 222	trm|Q96IH1|Q96IH1_HUMAN spt|Q16658|FSCN1_HUMAN	FSCN1 protein (Fragment) Fascin (Singed-like protein) (55 kDa actin-bundling protein) (p55)	6	1.004	3	1.097	0.347	1
4 224	trm|Q96FE8|Q96FE8_HUMAN spt|Q01844|EWS_HUMAN trm|Q96MN4|Q96MN4_HUMAN trm|Q96MX4|Q96MX4_HUMAN	Ewing sarcoma breakpoint region 1 (EWSR1 protein) RNA-binding protein EWS (EWS oncogene) (Ewing sarcoma breakpoint region 1 protein) "CDNA FLJ32119 fis, clone PEBLM1000034, highly similar to RNA-BINDING PROTEIN EWS " "CDNA FLJ31747 fis, clone NT2RI2007377, highly similar to RNA-BINDING PROTEIN EWS "	1	1.198	2	1.564
4 227	spt|P60866|RS20_HUMAN	40S ribosomal protein S20	8	1.032	6	1.173	1.401	0.1
4 229	trm|Q53GD8|Q53GD8_HUMAN spt|Q00688|FKBP3_HUMAN	FK506-binding protein 3 variant (Fragment) FK506-binding protein 3 (EC 5.2.1.8) (Peptidyl-prolyl cis-trans isomerase) (PPIase) (Rotamase) (25 kDa FKBP) (FKBP-25) (Rapamycin- selective 25 kDa immunophilin)	1	0.991	2	1.086
4 234	spt|P01608|KV1P_HUMAN	Ig kappa chain V-I region Roy	1	1.057	2	0.447
4 240	trm|Q5TIF8|Q5TIF8_HUMAN spt|P54819|KAD2_HUMAN	Adenylate kinase 2 "Adenylate kinase isoenzyme 2, mitochondrial (EC 2.7.4.3) (ATP-AMP transphosphorylase) "	4	0.893	2	1.741
4 243	spt|P38117|ETFB_HUMAN	Electron transfer flavoprotein subunit beta (Beta-ETF)	5	1.024	4	1.722	2.208	0.05
4 245	spt|Q13177|PAK2_HUMAN	Serine/threonine-protein kinase PAK 2 (EC 2.7.11.1) (p21-activated kinase 2) (PAK-2) (PAK65) (Gamma-PAK) (S6/H4 kinase)	1	1.078	2	0.963
4 248	trm|Q5JXL8|Q5JXL8_HUMAN	Hypothetical protein DKFZp564G0422	1	1.175	2	1.605
4 249	spt|Q9H461|FZD8_HUMAN	Frizzled-8 precursor (Fz-8) (hFz8)	0		0
4 250	trm|Q68DK3|Q68DK3_HUMAN	Hypothetical protein DKFZp686I10125 (Fragment)	2	1.313	4	0.47
4 259	spt|P61086|UBC1_HUMAN	Ubiquitin-conjugating enzyme E2-25 kDa (EC 6.3.2.19) (Ubiquitin- protein ligase) (Ubiquitin carrier protein) (E2(25K)) (Huntingtin- interacting protein 2) (HIP-2)	0		0
4 26	trm|Q6GMW0|Q6GMW0_HUMAN	IGKV1-5 protein	9	0.91	8	0.749	-1.339	0.15
4 263	spt|P22059|OSBP1_HUMAN	Oxysterol-binding protein 1	0		0
4 270	trm|Q6GMX8|Q6GMX8_HUMAN	IGKC protein	1	0.879	1	0.633
4 273	trm|Q5XKI1|Q5XKI1_HUMAN	Hypothetical protein (Fragment)	3	0.753	3	0.935	0.435	1
4 274	trm|Q0JRY5|Q0JRY5_HUMAN spt|Q9UMS6|SYNP2_HUMAN trm|Q0JUT5|Q0JUT5_HUMAN	Hypothetical protein SYNPO2 (Fragment) Synaptopodin-2 (Myopodin) (Genethonin 2) Hypothetical protein SYNPO2 (Fragment)	1	1.275	1	6.598
4 280	spt|Q15654|TRIP6_HUMAN trm|Q9BXP3|Q9BXP3_HUMAN trm|Q68D94|Q68D94_HUMAN	Thyroid receptor-interacting protein 6 (TRIP6) (OPA-interacting protein 1) (Zyxin-related protein 1) (ZRP-1) Thyroid receptor interacting protein 6 Hypothetical protein DKFZp686J22257	1	1.758	1	8.615
4 285	spt|Q99715|COCA1_HUMAN trm|Q5VYK1|Q5VYK1_HUMAN	Collagen alpha-1(XII) chain precursor "Collagen, type XII, alpha 1 "	2	1.035	4	0.981
4 286	trm|Q504R8|Q504R8_HUMAN trm|Q66PJ3|Q66PJ3_HUMAN	ADP-ribosylation-like factor 6 interacting protein 4 ADP-ribosylation-like factor 6 interacting protein 4	0		1	8.948
4 292	spt|Q14624|ITIH4_HUMAN trm|Q59FS1|Q59FS1_HUMAN trm|Q68DH2|Q68DH2_HUMAN	Inter-alpha-trypsin inhibitor heavy chain H4 precursor (ITI heavy chain H4) (Inter-alpha-inhibitor heavy chain 4) (Inter-alpha-trypsin inhibitor family heavy chain-related protein) (IHRP) (Plasma kallikrein sensitive glycoprotein 120) (PK-120) (GP120) [Contains: 70 kDa inter-alpha-trypsin inhibitor heavy chain H4; 35 kDa inter-alpha- trypsin inhibitor heavy chain H4] Inter-alpha (Globulin) inhibi…	4	0.971	2	1.512
4 294	spt|Q9NP81|SYSM_HUMAN	Seryl-tRNA synthetase, mitochondrial precursor (EC 6.1.1.11) (Serine-- tRNA ligase) (SerRSmt)	0		1	5.11
4 297	trm|Q14006|Q14006_HUMAN	HF protein (Fragment)	1	1.891	0
4 299	spt|Q8N257|H2B3B_HUMAN	Histone H2B type 3-B (H2B type 12)	4	1.073	2	1.126
4 300	trm|Q86T83|Q86T83_HUMAN	Hypothetical protein DKFZp451J0218	1	1.136	2	1.195
4 301	trm|Q53GG3|Q53GG3_HUMAN	Sorting nexin 2 variant (Fragment)	0		1	6.412
4 302	trm|Q59ET0|Q59ET0_HUMAN	Glucan , branching enzyme 1 variant (Fragment)	4	1.133	2	0.95
4 303	trm|Q8WZA9|Q8WZA9_HUMAN	FKSG27	0		1	10.198
4 306	spt|P01008|ANT3_HUMAN	Antithrombin-III precursor (ATIII)	6	0.97	1	0.552
4 307	spt|O15231|ZN185_HUMAN	Zinc finger protein 185 (LIM-domain protein ZNF185) (P1-A)	1	1.105	2	0.795
4 310	spt|Q9BUJ2|HNRL1_HUMAN	Heterogeneous nuclear ribonucleoprotein U-like protein 1 (Adenovirus early region 1B-associated protein 5) (E1B-55 kDa-associated protein 5) (E1B-AP5)	1	1.222	2	1.199
4 312	spt|P00747|PLMN_HUMAN	Plasminogen precursor (EC 3.4.21.7) [Contains: Plasmin heavy chain A; Activation peptide; Angiostatin; Plasmin heavy chain A, short form; Plasmin light chain B]	4	1.208	2	1.767
4 314	trm|Q9H290|Q9H290_HUMAN trm|Q9UK40|Q9UK40_HUMAN	Hepatopoietin protein Hepatopoietin	0		0
4 315	spt|P02652|APOA2_HUMAN	Apolipoprotein A-II precursor (Apo-AII) (ApoA-II) [Contains: Apolipoprotein A-II(1-76)]	8	0.922	6	0.549	-2.382	0.025
4 316	trm|Q562N2|Q562N2_HUMAN	Actin-like protein (Fragment)	5	1	4	1.422	1.026	0.2
4 318	trm|Q14491|Q14491_HUMAN trm|Q549G1|Q549G1_HUMAN trm|Q96FH6|Q96FH6_HUMAN spt|P69892|HBG2_HUMAN spt|P69891|HBG1_HUMAN trm|Q9UNL6|Q9UNL6_HUMAN	Hemoglobin gamma-G (Fragment) PRO2979 "Hemoglobin, gamma A " Hemoglobin subunit gamma-2 (Hemoglobin gamma-2 chain) (Gamma-2-globin) (Hemoglobin gamma-G chain) (Hb F Ggamma) Hemoglobin subunit gamma-1 (Hemoglobin gamma-1 chain) (Gamma-1-globin) (Hemoglobin gamma-A chain) (Hb F Agamma) Hemoglobin gamma-G (Fragment)	1	1.493	2	0.736
4 320	spt|Q32MZ4|LRRF1_HUMAN	Leucine-rich repeat flightless-interacting protein 1 (LRR FLII- interacting protein 1) (TAR RNA-interacting protein) (GC-binding factor 2)	1	0.738	2	1.775
4 321	trm|Q6ZSX1|Q6ZSX1_HUMAN	CDNA FLJ45151 fis, clone BRAWH3042447, highly similar to Homo sapiens p53 inducible protein (PIR121) (Cytoplasmic FMR1 interacting protein 1 isoform 4)	1	1.203	2	1.038
4 322	spt|P55011|S12A2_HUMAN trm|Q4G117|Q4G117_HUMAN	Solute carrier family 12 member 2 (Bumetanide-sensitive sodium- (potassium)-chloride cotransporter 1) (Basolateral Na-K-Cl symporter) SLC12A2 protein	1	1.15	2	1.099
4 323	spt|Q9Y383|LC7L2_HUMAN	Putative RNA-binding protein Luc7-like 2	0		1	8.564
4 327	spt|O75781|PALM_HUMAN	Paralemmin	0		0
4 329	spt|P59998|ARPC4_HUMAN	Actin-related protein 2/3 complex subunit 4 (ARP2/3 complex 20 kDa subunit) (p20-ARC)	7	0.999	5	1.025	0.242	1
4 331	trm|Q5JW81|Q5JW81_HUMAN trm|Q5JW79|Q5JW79_HUMAN trm|Q6FHL9|Q6FHL9_HUMAN spt|Q15121|PEA15_HUMAN	Phosphoprotein enriched in astrocytes 15 Phosphoprotein enriched in astrocytes 15 PEA15 protein Astrocytic phosphoprotein PEA-15 (Phosphoprotein enriched in diabetes) (PED)	5	0.759	5	1.975	2.96	0.01
4 332	trm|Q3MHD6|Q3MHD6_HUMAN spt|Q14061|COX17_HUMAN	COX17 cytochrome c oxidase assembly homolog (S. cerevisiae) Cytochrome c oxidase copper chaperone	0		1	9.631
4 335	spt|P68133|ACTS_HUMAN	Actin, alpha skeletal muscle (Alpha-actin-1)	5	0.73	4	0.62	-0.609	1
4 337	trm|Q86XQ2|Q86XQ2_HUMAN spt|P15531|NDKA_HUMAN	NM23-H1 Nucleoside diphosphate kinase A (EC 2.7.4.6) (NDK A) (NDP kinase A) (Tumor metastatic process-associated protein) (Metastasis inhibition factor nm23) (nm23-H1) (Granzyme A-activated DNase) (GAAD)	3	0.914	2	0.793
4 338	trm|Q14222|Q14222_HUMAN	EEF1A protein (Fragment)	6	0.958	3	1.12	1.27	0.15
4 340	trm|Q68DG1|Q68DG1_HUMAN trm|Q6PIM5|Q6PIM5_HUMAN	Hypothetical protein DKFZp686A0439 KIAA1598 protein	1	0.728	2	0.438
4 347	trm|Q8IWE7|Q8IWE7_HUMAN spt|P10253|LYAG_HUMAN trm|Q09GN4|Q09GN4_HUMAN	GAA protein Lysosomal alpha-glucosidase precursor (EC 3.2.1.20) (Acid maltase) (Aglucosidase alfa) [Contains: 76 kDa lysosomal alpha-glucosidase; 70 kDa lysosomal alpha-glucosidase] Alpha-glucosidase	3	0.901	6	0.996	0.845	0.25
4 348	spt|Q3LXA3|DAK_HUMAN trm|Q2L9C1|Q2L9C1_HUMAN	Dihydroxyacetone kinase (EC 2.7.1.29) (Glycerone kinase) (DHA kinase) Dha kinase/FMN cyclase splice variant	0		0
4 351	spt|Q15637|SF01_HUMAN trm|Q14820|Q14820_HUMAN	Splicing factor 1 (Zinc finger protein 162) (Transcription factor ZFM1) (Zinc finger gene in MEN1 locus) (Mammalian branch point-binding protein mBBP) (BBP) "ZFM1 protein, alternatively spliced product "	4	0.941	2	1.276
4 353	trm|Q9Y3I0|Q9Y3I0_HUMAN trm|Q9P0J3|Q9P0J3_HUMAN trm|Q6IAI0|Q6IAI0_HUMAN trm|Q9P037|Q9P037_HUMAN trm|Q9BWL4|Q9BWL4_HUMAN	Hypothetical protein (Novel protein HSPC117) (DJ149A16.6 protein) (Chromosome 22 open reading frame 28) Putative 55 kDa protein HSPC117 protein HSPC117 Chromosome 22 open reading frame 28	0		1	10.473
4 356	trm|Q53GU6|Q53GU6_HUMAN spt|O43776|SYNC_HUMAN	Asparaginyl-tRNA synthetase variant (Fragment) "Asparaginyl-tRNA synthetase, cytoplasmic (EC 6.1.1.22) (Asparagine-- tRNA ligase) (AsnRS) "	6	1.333	3	1.498	0.833	0.25
4 358	spt|Q96CX2|KCD12_HUMAN	BTB/POZ domain-containing protein KCTD12 (Pfetin) (Predominantly fetal expressed T1 domain)	4	1.489	2	0.819
4 359	trm|Q3KRA8|Q3KRA8_HUMAN trm|Q8TD27|Q8TD27_HUMAN trm|Q6GMW9|Q6GMW9_HUMAN trm|Q6NS36|Q6NS36_HUMAN trm|Q6NZ44|Q6NZ44_HUMAN spt|P02794|FRIH_HUMAN	FTH1 protein (Fragment) Placenta immunoregulatory factor PLIF Hypothetical protein FTH1 protein (Fragment) FTH1 protein Ferritin heavy chain (EC 1.16.3.1) (Ferritin H subunit) (Proliferation-inducing gene 15 protein)	1	1.014	2	1.065
4 36	trm|Q53GZ6|Q53GZ6_HUMAN	Heat shock 70kDa protein 8 isoform 1 variant (Fragment)	3	0.985	6	0.941	-0.38	1
4 362	spt|Q8NBJ7|SUMF2_HUMAN	Sulfatase-modifying factor 2 precursor (C-alpha-formyglycine- generating enzyme 2)	4	0.853	2	0.911
4 366	spt|Q9NR46|SHLB2_HUMAN	SH3 domain GRB2-like protein B2 (Endophilin-B2)	1	1.035	2	1.4
4 367	trm|Q8WUN3|Q8WUN3_HUMAN	ZNF252 protein (Fragment)	1	1.069	2	0.983
4 371	trm|Q6FGV9|Q6FGV9_HUMAN spt|Q15126|PMVK_HUMAN	PMVK protein (Phosphomevalonate kinase) (Fragment) Phosphomevalonate kinase (EC 2.7.4.2) (PMKase)	1	1.267	1	1.459
4 373	trm|Q7Z623|Q7Z623_HUMAN trm|Q5SRE9|Q5SRE9_HUMAN trm|Q7Z7P9|Q7Z7P9_HUMAN	PHYHD1 protein (Phytanoyl-CoA dioxygenase domain containing 1) Phytanoyl-CoA dioxygenase domain containing 1 (Fragment) PHYHD1 protein	1	0.829	2	1.054
4 374	trm|Q53YE8|Q53YE8_HUMAN spt|P25786|PSA1_HUMAN	Proteasome (Prosome, macropain) subunit, alpha type, 1 Proteasome subunit alpha type 1 (EC 3.4.25.1) (Proteasome component C2) (Macropain subunit C2) (Multicatalytic endopeptidase complex subunit C2) (Proteasome nu chain) (30 kDa prosomal protein) (PROS-30)	7	0.892	5	1.306	1.725	0.1
4 375	spt|P30740|ILEU_HUMAN	Leukocyte elastase inhibitor (LEI) (Serpin B1) (Monocyte/neutrophil elastase inhibitor) (M/NEI) (EI)	2	0.927	4	1.173
4 377	trm|Q5BJF0|Q5BJF0_HUMAN spt|P55735|SEC13_HUMAN trm|Q59FA6|Q59FA6_HUMAN	SEC13-like 1 (S. cerevisiae) SEC13-related protein (SEC13-like protein 1) SEC13-like 1 isoform b variant (Fragment)	2	0.999	1	1.197
4 379	trm|O00193|O00193_HUMAN	Small acidic protein (Chromosome 11 open reading frame 58) (SMAP protein)	3	0.921	3	1.129	1.364	0.15
4 381	spt|P01034|CYTC_HUMAN	Cystatin C precursor (Neuroendocrine basic polypeptide) (Gamma-trace) (Post-gamma-globulin)	1	1.03	2	1.07
4 387	spt|Q9Y2B0|MSAP_HUMAN	MIR-interacting saposin-like protein precursor (Transmembrane protein 4) (Putative secreted protein ZSIG9)	3	1.151	3	1.069	-0.487	1
4 388	spt|Q96C19|EFHD2_HUMAN	EF-hand domain-containing protein 2 (Swiprosin-1)	0		0
4 390	spt|P25398|RS12_HUMAN trm|Q5TBJ1|Q5TBJ1_HUMAN trm|Q76M58|Q76M58_HUMAN	40S ribosomal protein S12 Ribosomal protein S12 40S ribosomal protein S12	8	1.063	6	1.147	0.735	0.25
4 394	spt|Q15185|TEBP_HUMAN	Prostaglandin E synthase 3 (EC 5.3.99.3) (Cytosolic prostaglandin E2 synthase) (cPGES) (Telomerase-binding protein p23) (Hsp90 co- chaperone) (Progesterone receptor complex p23)	6	1.021	4	0.807	-0.564	1
4 395	trm|Q69YG1|Q69YG1_HUMAN spt|P58546|MTPN_HUMAN	Hypothetical protein DKFZp761E1322 (Hypothetical protein MTPN) (V-1 protein) Myotrophin (Protein V-1)	5	0.946	6	1.077	1.873	0.05
4 396	spt|P35080|PROF2_HUMAN trm|Q4VBQ4|Q4VBQ4_HUMAN	Profilin-2 (Profilin II) Profilin 2	0		1	6
4 397	spt|P02656|APOC3_HUMAN	Apolipoprotein C-III precursor (Apo-CIII) (ApoC-III)	4	1.199	2	0.792
4 399	spt|Q07654|TFF3_HUMAN trm|Q9UDA5|Q9UDA5_HUMAN	Trefoil factor 3 precursor (Intestinal trefoil factor) (hP1.B) Trefoil factor (Fragment)	1	1.131	2	1.204
4 40	trm|Q6GMX2|Q6GMX2_HUMAN	IGHA1 protein	8	0.921	6	0.858	-0.376	1
4 402	spt|P80303|NUCB2_HUMAN trm|Q2L696|Q2L696_HUMAN	Nucleobindin-2 precursor (DNA-binding protein NEFA) (Gastric cancer antigen Zg4) Nucb2 splice variant	1	0.924	2	0.784
4 405	trm|Q5TD55|Q5TD55_HUMAN	OTTHUMP00000031270 (Fragment)	1	0.99	2	0.796
4 406	spt|Q9UHV7|TR240_HUMAN	Thyroid hormone receptor-associated protein complex 240 kDa component (Trap240) (Thyroid hormone receptor-associated protein 1) (Vitamin D3 receptor-interacting protein complex component DRIP250) (DRIP 250) (Activator-recruited cofactor 250 kDa component) (ARC250)	0		0
4 409	trm|Q6PIH4|Q6PIH4_HUMAN	Hypothetical protein	2	1.219	1	0.255
4 410	trm|Q6PJF2|Q6PJF2_HUMAN	Hypothetical protein	2	1.097	1	0.387
4 415	spt|O60312|AT10A_HUMAN	Probable phospholipid-transporting ATPase VA (EC 3.6.3.1) (ATPVA) (Aminophospholipid translocase VA)	0		0
4 420	spt|P31930|UQCR1_HUMAN	Ubiquinol-cytochrome-c reductase complex core protein I, mitochondrial precursor (EC 1.10.2.2)	0		0
4 422	spt|Q9NZS2|KLRF1_HUMAN trm|Q4KN30|Q4KN30_HUMAN trm|Q4KN05|Q4KN05_HUMAN trm|Q4KMZ4|Q4KMZ4_HUMAN	Killer cell lectin-like receptor subfamily F member 1 (Lectin-like receptor F1) (Activating coreceptor NKp80) KLRF1 protein KLRF1 protein KLRF1 protein	1	2.414	2	0.744
4 423	trm|Q5SQI4|Q5SQI4_HUMAN spt|P27482|CALL3_HUMAN	Calmodulin-like 3 Calmodulin-like protein 3 (Calmodulin-related protein NB-1) (CaM-like protein) (CLP)	1	1.204	2	3.174
4 426	spt|P05455|LA_HUMAN trm|Q14730|Q14730_HUMAN	Lupus La protein (Sjoegren syndrome type B antigen) (SS-B) (La ribonucleoprotein) (La autoantigen) La 4.1 protein (Fragment)	0		1	3.719
4 429	trm|Q8NB11|Q8NB11_HUMAN spt|P50579|AMPM2_HUMAN	CDNA FLJ34411 fis, clone HEART2002220, highly similar to METHIONINE AMINOPEPTIDASE 2 (EC 3.4.11.18) Methionine aminopeptidase 2 (EC 3.4.11.18) (MetAP 2) (Peptidase M 2) (Initiation factor 2-associated 67 kDa glycoprotein) (p67) (p67eIF2)	0		0
4 430	trm|O43245|O43245_HUMAN	Protein p65	0		0
4 435	spt|Q01469|FABPE_HUMAN	Fatty acid-binding protein, epidermal (E-FABP) (Psoriasis-associated fatty acid-binding protein homolog) (PA-FABP)	3	0.911	4	0.583	-0.763	0.25
4 436	spt|Q5SZK8|FREM2_HUMAN	FRAS1-related extracellular matrix protein 2 precursor (ECM3 homolog)	1	1.026	2	1.367
4 51	trm|Q5VU66|Q5VU66_HUMAN	Tropomyosin 3	6	0.741	4	1.467	3.321	0.01
4 82	trm|Q596K9|Q596K9_HUMAN spt|P63313|TYB10_HUMAN	Migration-inducing protein 12 (Hypothetical protein TMSB10) Thymosin beta-10	5	0.856	4	1.399	3.868	0.005
4 84	trm|Q6P6D7|Q6P6D7_HUMAN spt|P18669|PGAM1_HUMAN trm|Q53G35|Q53G35_HUMAN trm|Q6FHU2|Q6FHU2_HUMAN	Phosphoglycerate mutase 1 (Brain) Phosphoglycerate mutase 1 (EC 5.4.2.1) (EC 5.4.2.4) (EC 3.1.3.13) (Phosphoglycerate mutase isozyme B) (PGAM-B) (BPG-dependent PGAM 1) Phosphoglycerate mutase 1 (Brain) variant (Fragment) PGAM1 protein (Phosphoglycerate mutase 1) (Brain) (Fragment)	7	0.967	5	1.127	1.093	0.2
5 102	trm|Q5I6Y4|Q5I6Y4_HUMAN	Lamin A/C transcript variant 1	5	0.952	4	0.939	-0.067	1
5 145	spt|P13798|ACPH_HUMAN	Acylamino-acid-releasing enzyme (EC 3.4.19.1) (AARE) (Acyl-peptide hydrolase) (APH) (Acylaminoacyl-peptidase) (Oxidized protein hydrolase) (OPH) (DNF15S2 protein)	7	1.052	5	1.359	1.427	0.1
5 152	spt|P49773|HINT1_HUMAN	Histidine triad nucleotide-binding protein 1 (Adenosine 5'- monophosphoramidase) (Protein kinase C inhibitor 1) (Protein kinase C- interacting protein 1) (PKCI-1)	6	0.951	6	1.181	1.371	0.15
5 159	trm|Q96I38|Q96I38_HUMAN spt|P29692|EF1D_HUMAN	EEF1D protein (Eukaryotic translation elongation factor 1 delta) (Guanine nucleotide exchange protein) Elongation factor 1-delta (EF-1-delta) (Antigen NY-CO-4)	5	0.934	4	0.879	-0.545	1
5 171	trm|Q32LZ2|Q32LZ2_HUMAN spt|P30043|BLVRB_HUMAN	Biliverdin reductase B (Flavin reductase (NADPH)) Flavin reductase (EC 1.5.1.30) (FR) (NADPH-dependent diaphorase) (NADPH-flavin reductase) (FLR) (Biliverdin reductase B) (EC 1.3.1.24) (BVR-B) (Biliverdin-IX beta-reductase) (Green heme-binding protein) (GHBP)	1	0.753	2	0.836
5 180	trm|Q8N4Y9|Q8N4Y9_HUMAN	IGHG3 protein	1	1.5	2	0.789
5 194	trm|Q4LE33|Q4LE33_HUMAN spt|P24821|TENA_HUMAN trm|Q5T7S3|Q5T7S3_HUMAN	TNC variant protein (Fragment) Tenascin precursor (TN) (Tenascin-C) (TN-C) (Hexabrachion) (Cytotactin) (Neuronectin) (GMEM) (JI) (Myotendinous antigen) (Glioma- associated-extracellular matrix antigen) (GP 150-225) Tenascin C (Hexabrachion)	1	0.532	3	1.363
5 203	trm|Q7Z664|Q7Z664_HUMAN	Hypothetical protein DKFZp779N0926 (Fragment)	6	1	3	0.411	-3.75	0.005
5 209	spt|Q13404|UB2V1_HUMAN	Ubiquitin-conjugating enzyme E2 variant 1 (UEV-1) (CROC-1) (Ubiquitin- conjugating enzyme variant Kua) (TRAF6-regulated IKK activator 1 beta Uev1A)	2	0.949	4	1.06
5 212	trm|Q6IAB8|Q6IAB8_HUMAN trm|Q9NX46|Q9NX46_HUMAN trm|Q53G94|Q53G94_HUMAN	ADPRHL2 protein "CDNA FLJ20446 fis, clone KAT05231 (ADP-ribosylhydrolase like 2) (Ecto- ADP-ribosylhydrolase precursor) (ADP-ribosyl-hydrolase precursor) " ADP-ribosylhydrolase like 2 variant (Fragment)	1	1	2	1.465
5 219	trm|Q17RC7|Q17RC7_HUMAN trm|Q14CR2|Q14CR2_HUMAN	Chromosome 14 open reading frame 73 Chromosome 14 open reading frame 73	1	0.978	2	1.058
5 222	spt|O43396|TXNL1_HUMAN	Thioredoxin-like protein 1 (32 kDa thioredoxin-related protein)	5	0.896	4	0.994	0.667	1
5 229	trm|Q8TC63|Q8TC63_HUMAN spt|P01861|IGHG4_HUMAN	IGHG4 protein Ig gamma-4 chain C region	5	1	2	1.981
5 233	spt|Q14657|LAGE3_HUMAN	L antigen family member 3 (Protein ITBA2) (Protein ESO-3)	0		0
5 235	trm|Q60FE2|Q60FE2_HUMAN spt|P35579|MYH9_HUMAN	Non-muscle myosin heavy polypeptide 9 "Myosin-9 (Myosin heavy chain, nonmuscle IIa) (Nonmuscle myosin heavy chain IIa) (NMMHC II-a) (NMMHC-IIA) (Cellular myosin heavy chain, type A) (Nonmuscle myosin heavy chain-A) (NMMHC-A) "	4	1.013	5	1.224	1.874	0.1
5 239	trm|Q6NUL6|Q6NUL6_HUMAN	PITPNA protein (Fragment)	4	0.871	2	1.446
5 247	spt|P45974|UBP5_HUMAN	Ubiquitin carboxyl-terminal hydrolase 5 (EC 3.1.2.15) (Ubiquitin thioesterase 5) (Ubiquitin-specific-processing protease 5) (Deubiquitinating enzyme 5) (Isopeptidase T)	1	1.121	2	1.297
5 249	trm|Q6ZRR8|Q6ZRR8_HUMAN	CDNA FLJ46155 fis, clone TESTI4001517, moderately similar to Keratin, type I cytoskeletal 18	1	2.56	2	0.54
5 252	spt|Q9NQC3|RTN4_HUMAN	Reticulon-4 (Neurite outgrowth inhibitor) (Nogo protein) (Foocen) (Neuroendocrine-specific protein) (NSP) (Neuroendocrine-specific protein C homolog) (RTN-x) (Reticulon-5)	0		1	10.347
5 255	trm|Q53G16|Q53G16_HUMAN trm|Q9H0U0|Q9H0U0_HUMAN trm|Q2NL95|Q2NL95_HUMAN spt|Q9UMR2|DD19B_HUMAN	DEAD (Asp-Glu-Ala-As) box polypeptide 19 variant (Fragment) Hypothetical protein DKFZp564C183 DDX19B protein (Fragment) ATP-dependent RNA helicase DDX19B (EC 3.6.1.-) (DEAD box protein 19B) (DEAD box RNA helicase DEAD5)	1	0.803	2	0.675
5 256	trm|Q53HH7|Q53HH7_HUMAN trm|Q0Z7V0|Q0Z7V0_HUMAN trm|Q53T09|Q53T09_HUMAN spt|P13010|KU86_HUMAN	ATP-dependent DNA helicase II variant (Fragment) "X-ray repair complementing defective repair in Chinese hamster cells 5 (Double-strand-break rejoining; Ku autoantigen, 80kDa) " Hypothetical protein XRCC5 (Fragment) ATP-dependent DNA helicase 2 subunit 2 (EC 3.6.1.-) (ATP-dependent DNA helicase II 80 kDa subunit) (Lupus Ku autoantigen protein p86) (Ku86) (Ku80) (86 kDa subunit of Ku antigen) (Thy…	1	1.32	2	0.889
5 265	spt|P06730|IF4E_HUMAN trm|Q32Q75|Q32Q75_HUMAN	Eukaryotic translation initiation factor 4E (eIF4E) (eIF-4E) (mRNA cap-binding protein) (eIF-4F 25 kDa subunit) Eukaryotic translation initiation factor 4E	4	0.728	2	0.836
5 275	trm|Q7Z3U5|Q7Z3U5_HUMAN trm|Q59G75|Q59G75_HUMAN spt|P41252|SYIC_HUMAN trm|Q6P0M4|Q6P0M4_HUMAN trm|Q7Z3T4|Q7Z3T4_HUMAN trm|Q7Z355|Q7Z355_HUMAN	Hypothetical protein DKFZp686L0869 "Isoleucyl-tRNA synthetase, cytoplasmic variant (Fragment) " "Isoleucyl-tRNA synthetase, cytoplasmic (EC 6.1.1.5) (Isoleucine--tRNA ligase) (IleRS) (IRS) " IARS protein Hypothetical protein DKFZp686O10151 Hypothetical protein DKFZp686L17145	0		1	24.449
5 280	trm|Q8WVA2|Q8WVA2_HUMAN spt|Q9NZU1|FLRT1_HUMAN	Fibronectin leucine rich transmembrane protein 1 Leucine-rich repeat transmembrane protein FLRT1 precursor (Fibronectin-like domain-containing leucine-rich transmembrane protein 1)	0		0
5 285	trm|Q96GF2|Q96GF2_HUMAN	GSPT1 protein	1	1.098	2	1.178
5 287	trm|Q6B6N3|Q6B6N3_HUMAN spt|P04899|GNAI2_HUMAN trm|Q96C71|Q96C71_HUMAN trm|Q93020|Q93020_HUMAN	Galphai2 protein "Guanine nucleotide-binding protein G(i), alpha-2 subunit (Adenylate cyclase-inhibiting G alpha protein) " "Guanine nucleotide binding protein (G protein), alpha inhibiting activity polypeptide 2 (GNAI2 protein) " GTP-binding regulatory protein Gi alpha-2 chain (Fragment)	1	0.805	2	1.112
5 289	spt|O00232|PSD12_HUMAN	26S proteasome non-ATPase regulatory subunit 12 (26S proteasome regulatory subunit p55)	0		1	4.182
5 294	trm|Q2TU34|Q2TU34_HUMAN spt|P09467|F16P1_HUMAN	Growth-inhibiting protein 17 "Fructose-1,6-bisphosphatase 1 (EC 3.1.3.11) (D-fructose-1,6- bisphosphate 1-phosphohydrolase 1) (FBPase 1) "	1	1.038	3	2.404
5 297	spt|P42025|ACTY_HUMAN spt|P61163|ACTZ_HUMAN	Beta-centractin (Actin-related protein 1B) (ARP1B) Alpha-centractin (Centractin) (Centrosome-associated actin homolog) (Actin-RPV) (ARP1)	1	0.872	2	0.879
5 300	trm|Q59G94|Q59G94_HUMAN spt|O43670|ZN207_HUMAN trm|Q53XS9|Q53XS9_HUMAN trm|Q8N395|Q8N395_HUMAN	Zinc finger protein 207 variant (Fragment) Zinc finger protein 207 Zinc finger protein 207 Hypothetical protein DKFZp761N202 (Fragment)	5	1.215	6	1.433	1.181	0.15
5 304	spt|Q99598|TSNAX_HUMAN trm|Q5VVQ1|Q5VVQ1_HUMAN	Translin-associated protein X (Translin-associated factor X) Translin-associated factor X (Fragment)	1	1.077	2	0.991
5 309	spt|O00303|IF35_HUMAN	Eukaryotic translation initiation factor 3 subunit 5 (eIF-3 epsilon) (eIF3 p47 subunit) (eIF3f)	1	0.929	2	0.983
5 312	trm|Q5JNW7|Q5JNW7_HUMAN trm|Q6FHU0|Q6FHU0_HUMAN spt|P28062|PSB8_HUMAN trm|Q5QNR8|Q5QNR8_HUMAN trm|Q5JNW6|Q5JNW6_HUMAN	Proteasome (Prosome, macropain) subunit, beta type, 8 (Large multifunctional protease 7) PSMB8 protein (Fragment) Proteasome subunit beta type 8 precursor (EC 3.4.25.1) (Proteasome component C13) (Macropain subunit C13) (Multicatalytic endopeptidase complex subunit C13) Proteasome subunit beta type (EC 3.4.25.1) Proteasome subunit beta type (EC 3.4.25.1)	1	0.943	2	1.045
5 314	spt|Q92820|GGH_HUMAN	Gamma-glutamyl hydrolase precursor (EC 3.4.19.9) (Gamma-Glu-X carboxypeptidase) (Conjugase) (GH)	1	1.466	2	1.585
5 317	spt|Q9UQN3|CHM2B_HUMAN	Charged multivesicular body protein 2b (Chromatin-modifying protein 2b) (CHMP2b) (CHMP2.5) (Vacuolar protein sorting 2-2) (Vps2-2) (hVps2- 2)	1	0.779	2	1.183
5 319	trm|Q502X3|Q502X3_HUMAN trm|Q9BR65|Q9BR65_HUMAN spt|P61224|RAP1B_HUMAN spt|P62834|RAP1A_HUMAN trm|Q5U0C3|Q5U0C3_HUMAN trm|Q14015|Q14015_HUMAN trm|Q14014|Q14014_HUMAN trm|Q9BXV4|Q9BXV4_HUMAN trm|Q92468|Q92468_HUMAN spt|P01111|RASN_HUMAN spt|P01116|RASK_HUMAN spt|P01112|RASH_HUMAN	RAP1B, member of RAS oncogene family V-Ha-ras Harvey rat sarcoma viral oncogene homolog (P19 H-RasIDX protein) Ras-related protein Rap-1b precursor (GTP-binding protein smg p21B) Ras-related protein Rap-1A precursor (GTP-binding protein smg-p21A) (Ras-related protein Krev-1) (C21KG) (G-22K) "RAP1A, member of RAS oncogene family " PR371 c-K-ras oncogene (Fragment) PR310 c-K-ras protein (Fragment) …	2	1.68	2	0.701
5 321	trm|Q5W0H4|Q5W0H4_HUMAN spt|P13693|TCTP_HUMAN trm|Q9UP43|Q9UP43_HUMAN	Tumor protein, translationally-controlled 1 Translationally-controlled tumor protein (TCTP) (p23) (Histamine- releasing factor) (HRF) (Fortilin) HDCMB21P	3	0.931	3	1.033	2.42	0.05
5 322	trm|Q53HP2|Q53HP2_HUMAN spt|O14773|TPP1_HUMAN	Tripeptidyl-peptidase I variant (Fragment) Tripeptidyl-peptidase 1 precursor (EC 3.4.14.9) (Tripeptidyl-peptidase I) (TPP-I) (Tripeptidyl aminopeptidase) (Lysosomal pepstatin insensitive protease) (LPIC) (Growth-inhibiting gene 1 protein)	7	0.996	5	0.835	-2.031	0.05
5 325	trm|Q3KQS8|Q3KQS8_HUMAN spt|Q15691|MARE1_HUMAN	Microtubule-associated protein, RP/EB family, member 1 Microtubule-associated protein RP/EB family member 1 (APC-binding protein EB1) (End-binding protein 1) (EB1)	5	0.821	4	0.917	0.9	0.2
5 326	spt|Q96D15|RCN3_HUMAN	Reticulocalbin-3 precursor (EF-hand calcium-binding protein RLP49)	3	0.966	1	9.381
5 332	trm|Q6LET3|Q6LET3_HUMAN spt|P00492|HPRT_HUMAN	HPRT1 protein (Fragment) Hypoxanthine-guanine phosphoribosyltransferase (EC 2.4.2.8) (HGPRT) (HGPRTase)	3	1.005	3	0.798	-2.354	0.05
5 333	spt|Q96IU4|AB14B_HUMAN	Abhydrolase domain-containing protein 14B (CCG1-interacting factor B)	2	1.076	4	0.955
5 337	trm|Q9NUF9|Q9NUF9_HUMAN spt|Q13232|NDK3_HUMAN	Nucleoside diphosphate kinase (EC 2.7.4.6) (Fragment) Nucleoside diphosphate kinase 3 (EC 2.7.4.6) (NDK 3) (NDP kinase 3) (Nucleoside diphosphate kinase C) (NDPKC) (nm23-H3) (DR-nm23)	1	0.75	2	1.035
5 341	trm|Q59GR8|Q59GR8_HUMAN	TPM1 protein variant (Fragment)	3	1.278	3	0.929	-1.674	0.1
5 344	spt|P61011|SRP54_HUMAN	Signal recognition particle 54 kDa protein (SRP54)	0		0
5 346	spt|P07205|PGK2_HUMAN	Phosphoglycerate kinase, testis specific (EC 2.7.2.3)	3	1.017	3	1.653	2.323	0.05
5 349	trm|Q5VSF1|Q5VSF1_HUMAN spt|Q9UHL4|DPP2_HUMAN	Dipeptidylpeptidase 7 Dipeptidyl-peptidase 2 precursor (EC 3.4.14.2) (Dipeptidyl-peptidase II) (DPP II) (Dipeptidyl aminopeptidase II) (Quiescent cell proline dipeptidase) (Dipeptidyl peptidase 7)	0		1	6.067
5 353	spt|O95302|FKBP9_HUMAN	FK506-binding protein 9 precursor (EC 5.2.1.8) (Peptidyl-prolyl cis- trans isomerase) (PPIase) (Rotamase)	1	0.94	2	0.823
5 354	spt|O43866|CD5L_HUMAN	CD5 antigen-like precursor (SP-alpha) (CT-2) (IgM-associated peptide)	0		1	7.336
5 356	spt|O00244|ATOX1_HUMAN	Copper transport protein ATOX1 (Metal transport protein ATX1)	4	1.067	2	0.933
5 36	trm|Q6GMX3|Q6GMX3_HUMAN	IGLC1 protein	3	0.85	3	0.531	-3.33	0.025
5 364	trm|Q96BF6|Q96BF6_HUMAN	BTB (POZ) domain containing 14A	5	1.138	2	1.422
5 365	trm|Q6FIA3|Q6FIA3_HUMAN spt|Q9UNF0|PACN2_HUMAN	PACSIN2 protein Protein kinase C and casein kinase substrate in neurons protein 2	1	1.015	2	1.165
5 367	trm|Q562X8|Q562X8_HUMAN	Actin-like protein (Fragment)	0		0
5 371	trm|Q658U4|Q658U4_HUMAN spt|Q96AY3|FKB10_HUMAN trm|Q6ZME7|Q6ZME7_HUMAN	Hypothetical protein DKFZp666D193 FK506-binding protein 10 precursor (EC 5.2.1.8) (Peptidyl-prolyl cis- trans isomerase) (PPIase) (Rotamase) (65 kDa FK506-binding protein) (FKBP65) (Immunophilin FKBP65) "CDNA FLJ23972 fis, clone HEP18230, highly similar to 65 kDa FK506- binding protein (EC 5.2.1.8) "	4	1.027	2	0.622
5 372	spt|P09486|SPRC_HUMAN	SPARC precursor (Secreted protein acidic and rich in cysteine) (Osteonectin) (ON) (Basement-membrane protein 40) (BM-40)	1	1.005	2	0.579
5 373	trm|Q53XC0|Q53XC0_HUMAN spt|P05198|IF2A_HUMAN	Full-length cDNA clone CS0DL010YH08 of B cells (Ramos cell line) of Homo sapiens (human) Eukaryotic translation initiation factor 2 subunit 1 (Eukaryotic translation initiation factor 2 subunit alpha) (eIF-2-alpha) (EIF- 2alpha) (EIF-2A)	7	1.033	6	1.897	2.159	0.05
5 379	spt|P07108|ACBP_HUMAN trm|Q4VWZ6|Q4VWZ6_HUMAN	Acyl-CoA-binding protein (ACBP) (Diazepam-binding inhibitor) (DBI) (Endozepine) (EP) "Diazepam binding inhibitor, splice form 1c "	7	0.966	8	1.598	3.54	0.002
5 38	trm|Q6GMX0|Q6GMX0_HUMAN trm|Q502W4|Q502W4_HUMAN	Hypothetical protein IGKC protein	6	0.928	3	0.417	-3.638	0.005
5 380	spt|P57058|HUNK_HUMAN	Hormonally up-regulated neu tumor-associated kinase (EC 2.7.11.1) (Serine/threonine-protein kinase MAK-V) (B19)	1	1.074	2	0.659
5 381	spt|P17948|VGFR1_HUMAN trm|Q5TAR1|Q5TAR1_HUMAN trm|Q59GQ9|Q59GQ9_HUMAN	Vascular endothelial growth factor receptor 1 precursor (EC 2.7.10.1) (VEGFR-1) (Vascular permeability factor receptor) (Tyrosine-protein kinase receptor FLT) (Flt-1) (Tyrosine-protein kinase FRT) (Fms-like tyrosine kinase 1) Tyrosine-protein kinase receptor (Fragment) Fms-related tyrosine kinase 1 (Vascular endothelial growth factor/vascular permeability factor receptor) variant (Fragment)	0		0
5 39	trm|Q6GMX5|Q6GMX5_HUMAN	IGHM protein	4	1.131	2	0.546
6 101	spt|Q9BW30|CG38_HUMAN	Protein CGI-38	2	1.078	4	1.113
6 103	trm|Q96J53|Q96J53_HUMAN trm|Q5U072|Q5U072_HUMAN trm|Q5U071|Q5U071_HUMAN spt|P26583|HMGB2_HUMAN	HMGB2 protein High-mobility group box 2 (HMGB2 protein) High-mobility group box 2 High mobility group protein B2 (High mobility group protein 2) (HMG- 2)	4	0.92	2	0.713
6 123	spt|Q9GZM8|NDEL1_HUMAN	Nuclear distribution protein nudE-like 1 (Protein Nudel) (Mitosin- associated protein 1)	0		1	9.465
6 149	trm|Q53QU2|Q53QU2_HUMAN spt|Q00341|VIGLN_HUMAN	Hypothetical protein HDLBP Vigilin (High density lipoprotein-binding protein) (HDL-binding protein)	1	0.714	2	0.872
6 154	spt|P35908|K22E_HUMAN trm|Q4VAQ2|Q4VAQ2_HUMAN	Keratin, type II cytoskeletal 2 epidermal (Cytokeratin-2e) (K2e) (CK 2e) Keratin 2 (Epidermal ichthyosis bullosa of Siemens)	6	1.474	3	0.823	-2.105	0.05
6 155	trm|Q8WX93|Q8WX93_HUMAN	Myoneurin	5	0.895	4	0.938	0.353	1
6 170	trm|Q6ICE6|Q6ICE6_HUMAN trm|Q9BWC7|Q9BWC7_HUMAN spt|P21964|COMT_HUMAN	COMT protein COMT protein Catechol O-methyltransferase (EC 2.1.1.6)	0		1	8.968
6 178	spt|Q8N1G4|LRC47_HUMAN	Leucine-rich repeat-containing protein 47	6	0.965	3	1.067	0.496	1
6 181	trm|Q16580|Q16580_HUMAN trm|Q8IWE9|Q8IWE9_HUMAN	NPAT protein "Similar to nuclear protein, ataxia-telangiectasia locus (Fragment) "	1	1.028	2	1.431
6 191	trm|Q53F10|Q53F10_HUMAN	UV excision repair protein RAD23 homolog B variant (Fragment)	3	1.196	1	6.691
6 194	spt|O15143|ARC1B_HUMAN	Actin-related protein 2/3 complex subunit 1B (ARP2/3 complex 41 kDa subunit) (p41-ARC)	1	0.97	2	1.31
6 195	spt|Q16363|LAMA4_HUMAN trm|Q5D044|Q5D044_HUMAN	Laminin alpha-4 chain precursor LAMA4 protein	0		1	22.798
6 199	spt|Q96I99|SUCB2_HUMAN trm|Q3ZCW5|Q3ZCW5_HUMAN	Succinyl-CoA ligase [GDP-forming] beta-chain, mitochondrial precursor (EC 6.2.1.4) (Succinyl-CoA synthetase, betaG chain) (SCS-betaG) (GTP- specific succinyl-CoA synthetase subunit beta) SUCLG2 protein (Fragment)	1	0.996	2	1.103
6 202	spt|Q16775|GLO2_HUMAN	Hydroxyacylglutathione hydrolase (EC 3.1.2.6) (Glyoxalase II) (GLX II)	1	1.071	2	1.946
6 203	trm|Q9NPR7|Q9NPR7_HUMAN	Hypothetical protein (Fragment)	0		1	10.567
6 204	spt|O75380|NDUS6_HUMAN	NADH dehydrogenase [ubiquinone] iron-sulfur protein 6, mitochondrial precursor (EC 1.6.5.3) (EC 1.6.99.3) (NADH-ubiquinone oxidoreductase 13 kDa-A subunit) (Complex I-13kD-A) (CI-13kD-A)	0		1	7.48
6 207	trm|Q5VSX5|Q5VSX5_HUMAN spt|Q9Y696|CLIC4_HUMAN	Chloride intracellular channel 4 (Hypothetical protein CLIC4) (CLIC4 protein) Chloride intracellular channel protein 4 (Intracellular chloride ion channel protein p64H1)	3	1.372	2	0.831
6 209	spt|Q9UDY2|ZO2_HUMAN trm|Q5VXL0|Q5VXL0_HUMAN	Tight junction protein ZO-2 (Zonula occludens 2 protein) (Zona occludens 2 protein) (Tight junction protein 2) Tight junction protein 2 (Zona occludens 2) (Hypothetical protein TJP2)	1	0.847	2	0.795
6 210	spt|P49756|RBM25_HUMAN trm|Q6P665|Q6P665_HUMAN trm|Q5XJ17|Q5XJ17_HUMAN trm|Q2TA72|Q2TA72_HUMAN trm|Q9H6A1|Q9H6A1_HUMAN	Probable RNA-binding protein 25 (RNA-binding motif protein 25) (RNA- binding region-containing protein 7) (Protein S164) RBM25 protein (Fragment) RBM25 protein RBM25 protein "CDNA: FLJ22454 fis, clone HRC09703. (Fragment) "	0		0
6 211	spt|Q15020|SART3_HUMAN	Squamous cell carcinoma antigen recognized by T-cells 3 (SART-3) (hSART-3) (Tat-interacting protein of 110 kDa) (Tip110)	1	0.763	2	0.859
6 213	spt|O43719|HTSF1_HUMAN trm|Q5H918|Q5H918_HUMAN trm|Q5H919|Q5H919_HUMAN	HIV Tat-specific factor 1 (Tat-SF1) HIV TAT specific factor 1 (Fragment) HIV TAT specific factor 1 (Fragment)	0		0
6 216	spt|Q9Y2J2|E41L3_HUMAN	Band 4.1-like protein 3 (4.1B) (Differentially expressed in adenocarcinoma of the lung protein 1) (DAL-1)	0		1	10.897
6 218	spt|P00367|DHE3_HUMAN trm|Q53GW3|Q53GW3_HUMAN trm|Q59FQ4|Q59FQ4_HUMAN	Glutamate dehydrogenase 1, mitochondrial precursor (EC 1.4.1.3) (GDH) Glutamate dehydrogenase 1 variant (Fragment) Glutamate dehydrogenase 1 variant (Fragment)	1	0.773	2	0.903
6 220	spt|Q92522|H1X_HUMAN	Histone H1x	0		0
6 225	trm|Q9UK67|Q9UK67_HUMAN spt|P29350|PTN6_HUMAN trm|Q53EL0|Q53EL0_HUMAN trm|Q53XS4|Q53XS4_HUMAN	70 kDa SHP-1L protein Tyrosine-protein phosphatase non-receptor type 6 (EC 3.1.3.48) (Protein-tyrosine phosphatase 1C) (PTP-1C) (Hematopoietic cell protein-tyrosine phosphatase) (SH-PTP1) (Protein-tyrosine phosphatase SHP-1) "Protein tyrosine phosphatase, non-receptor type 6 isoform 1 variant (Fragment) " "Protein tyrosine phosphatase, non-receptor type 6 "	1	1.442	2	1.094
6 228	spt|P32322|P5CR1_HUMAN trm|Q2TU78|Q2TU78_HUMAN trm|Q9HBQ4|Q9HBQ4_HUMAN	Pyrroline-5-carboxylate reductase 1 (EC 1.5.1.2) (P5CR 1) (P5C reductase 1) Proliferation-inducing protein 45 Hypothetical protein	0		0
6 229	trm|Q8IUY9|Q8IUY9_HUMAN trm|Q7Z574|Q7Z574_HUMAN spt|P46937|YAP1_HUMAN	YAP1 protein Yes-associated protein 2 65 kDa Yes-associated protein (YAP65)	0		0
6 233	trm|Q9HB10|Q9HB10_HUMAN	Pinch-2 protein (LIM and senescent cell antigen-like domains 3) (Hypothetical protein LOC96626)	0		0
6 234	trm|Q96CP2|Q96CP2_HUMAN	Hypothetical protein LOC114984	0		1	9.346
6 235	trm|Q53G81|Q53G81_HUMAN spt|P15559|NQO1_HUMAN trm|Q0P6K1|Q0P6K1_HUMAN	NAD(P)H menadione oxidoreductase 1, dioxin-inducible variant (Fragment) NAD(P)H dehydrogenase [quinone] 1 (EC 1.6.5.2) (Quinone reductase 1) (NAD(P)H:quinone oxidoreductase 1) (QR1) (DT-diaphorase) (DTD) (Azoreductase) (Phylloquinone reductase) (Menadione reductase) Hypothetical protein	2	1.305	4	2.254
6 237	trm|Q5VZR0|Q5VZR0_HUMAN spt|Q9H4G4|GAPR1_HUMAN	Chromosome 9 open reading frame 19 Golgi-associated plant pathogenesis-related protein 1 (Golgi- associated PR-1 protein) (GAPR-1) (Glioma pathogenesis-related protein 2) (GliPR 2)	0		1	7.814
6 240	spt|O60869|EDF1_HUMAN	Endothelial differentiation-related factor 1 (EDF-1) (Multiprotein- bridging factor 1) (MBF1)	1	0.884	2	0.693
6 243	trm|Q7Z4L1|Q7Z4L1_HUMAN trm|Q6IS14|Q6IS14_HUMAN spt|P63241|IF5A1_HUMAN trm|Q7L7L3|Q7L7L3_HUMAN	Eukaryotic initiation factor 5A isoform I variant A LOC143244 protein (Fragment) Eukaryotic translation initiation factor 5A-1 (eIF-5A-1) (eIF-5A1) (Eukaryotic initiation factor 5A isoform 1) (eIF-5A) (eIF-4D) (Rev- binding factor) Eukaryotic initiation factor 5A isoform I variant D (Eukaryotic translation initiation factor 5A) (Eukaryotic initiation factor 5A isoform I variant C) (Eukaryotic ini…	7	0.975	5	1.079	1.081	0.2
6 249	spt|Q8NFU3|KAT_HUMAN	Putative thiosulfate sulfurtransferase KAT (EC 2.8.1.1)	1	1.006	2	1.088
6 250	spt|P84085|ARF5_HUMAN	ADP-ribosylation factor 5	0		1	7.196
6 251	spt|P68036|UB2L3_HUMAN	Ubiquitin-conjugating enzyme E2 L3 (EC 6.3.2.19) (Ubiquitin-protein ligase L3) (Ubiquitin carrier protein L3) (UbcH7) (E2-F1) (L-UBC)	7	0.917	5	0.81	-0.817	0.25
6 252	trm|Q0P6I8|Q0P6I8_HUMAN spt|P63165|SUMO1_HUMAN trm|Q6P094|Q6P094_HUMAN	SUMO1 protein Small ubiquitin-related modifier 1 precursor (SUMO-1) (Ubiquitin-like protein SMT3C) (SMT3 homolog 3) (Ubiquitin-homology domain protein PIC1) (Ubiquitin-like protein UBL1) (GAP-modifying protein 1) (GMP1) (Sentrin) LOC391257 protein	1	0.969	2	0.915
6 253	spt|Q9BRA2|TXNL5_HUMAN	Thioredoxin-like protein 5 (14 kDa thioredoxin-related protein) (TRP14) (Protein 42-9-9)	1	0.934	2	1.041
6 254	spt|P13929|ENOB_HUMAN	Beta-enolase (EC 4.2.1.11) (2-phospho-D-glycerate hydro-lyase) (Muscle-specific enolase) (MSE) (Skeletal muscle enolase) (Enolase 3)	0		1	23.45
6 261	spt|Q9HC35|EMAL4_HUMAN	Echinoderm microtubule-associated protein-like 4 (EMAP-4) (Restrictedly overexpressed proliferation-associated protein) (Ropp 120)	0		1	6.047
6 262	spt|Q15046|SYK_HUMAN	Lysyl-tRNA synthetase (EC 6.1.1.6) (Lysine--tRNA ligase) (LysRS)	5	1.244	4	1.151	-0.415	1
6 263	trm|Q3ZUS8|Q3ZUS8_HUMAN trm|Q7YP32|Q7YP32_HUMAN trm|Q6SZ68|Q6SZ68_HUMAN trm|Q6F3E0|Q6F3E0_HUMAN	MHC class I antigen (Fragment) MHC class I antigen (Fragment) MHC class I antigen (Fragment) MHC class I antigen (Fragment)	1	1.002	2	0.881
6 266	spt|P12081|SYH_HUMAN	Histidyl-tRNA synthetase (EC 6.1.1.21) (Histidine--tRNA ligase) (HisRS)	1	0.74	2	0.698
6 268	trm|Q5HYL6|Q5HYL6_HUMAN spt|Q9NYL9|TMOD3_HUMAN	Hypothetical protein DKFZp686E1899 Tropomodulin-3 (Ubiquitous tropomodulin) (U-Tmod)	1	1.229	2	1.771
6 272	spt|O15031|PLXB2_HUMAN	Plexin-B2 precursor (MM1)	0		0
6 282	spt|Q96L91|EP400_HUMAN	E1A-binding protein p400 (EC 3.6.1.-) (p400 kDa SWI2/SNF2-related protein) (Domino homolog) (hDomino) (CAG repeat protein 32) (Trinucleotide repeat-containing gene 12 protein)	0		1	9.525
6 285	trm|Q96NX0|Q96NX0_HUMAN	Trefoil factor 3 (Fragment)	1	1.223	2	1.403
6 288	spt|Q9HCC0|MCCC2_HUMAN	Methylcrotonoyl-CoA carboxylase beta chain, mitochondrial precursor (EC 6.4.1.4) (3-Methylcrotonyl-CoA carboxylase 2) (MCCase subunit beta) (3-methylcrotonyl-CoA:carbon dioxide ligase subunit beta) (3- Methylcrotonyl-CoA carboxylase non-biotin-containing subunit)	1	1.05	2	0.894
6 294	trm|Q8TEP8|Q8TEP8_HUMAN trm|Q9HCK3|Q9HCK3_HUMAN	FLJ00145 protein (Fragment) KIAA1569 protein (Fragment)	1	0.802	2	0.903
6 295	trm|Q9P2P4|Q9P2P4_HUMAN trm|Q6N022|Q6N022_HUMAN trm|Q7Z3C7|Q7Z3C7_HUMAN trm|Q9Y4S2|Q9Y4S2_HUMAN	KIAA1302 protein (Fragment) Hypothetical protein DKFZp686K11107 (Fragment) Hypothetical protein DKFZp686D0412 (Fragment) Hypothetical protein DKFZp564O0423 (Fragment)	1	0.795	2	0.967
6 299	trm|Q8IUL9|Q8IUL9_HUMAN	Hemoglobin beta chain variant Hb.Sinai-Bel Air (Fragment)	3	1.394	3	0.542	-3.544	0.025
6 300	trm|Q9HAR8|Q9HAR8_HUMAN	Mutant beta-globin (Fragment)	0		0
6 305	trm|Q1AHP8|Q1AHP8_HUMAN	Hepatopoietin PCn127	1	0.896	2	1.003
6 308	spt|Q9HD23|MRS2L_HUMAN	Magnesium transporter MRS2L, mitochondrial precursor (MRS2-like protein)	1	0.901	2	0.955
6 34	trm|Q8N5K4|Q8N5K4_HUMAN trm|Q9BRV0|Q9BRV0_HUMAN trm|Q6MZW0|Q6MZW0_HUMAN	IGHA1 protein IGHA1 protein Hypothetical protein DKFZp686J11235 (Fragment)	1	1.083	2	0.565
6 44	trm|Q8NEJ1|Q8NEJ1_HUMAN	Hypothetical protein	0		0
6 70	trm|Q96EY0|Q96EY0_HUMAN	IGHM protein	1	1.812	2	0.551
6 78	trm|Q6PI81|Q6PI81_HUMAN	IGHM protein	5	0.617	4	0.57	-0.588	1
6 96	spt|Q15942|ZYX_HUMAN	Zyxin (Zyxin-2)	5	0.968	4	1.063	0.489	1
7 105	trm|Q5UGI3|Q5UGI3_HUMAN trm|Q5PY61|Q5PY61_HUMAN trm|Q5U5U6|Q5U5U6_HUMAN trm|Q96C32|Q96C32_HUMAN trm|Q96MH4|Q96MH4_HUMAN	Ubiquitin C splice variant Ubiquitin C splice variant Ubiquitin B UBC protein "CDNA FLJ32377 fis, clone SKMUS1000014, highly similar to Polyubiquitin 9 "	2	1.057	4	1.073
7 112	trm|Q68CQ5|Q68CQ5_HUMAN spt|P22234|PUR6_HUMAN	Hypothetical protein DKFZp781N1372 Multifunctional protein ADE2 [Includes: Phosphoribosylaminoimidazole- succinocarboxamide synthase (EC 6.3.2.6) (SAICAR synthetase); Phosphoribosylaminoimidazole carboxylase (EC 4.1.1.21) (AIR carboxylase) (AIRC)]	3	0.931	3	1.686	9.065	0
7 150	spt|P10645|CMGA_HUMAN trm|Q53FA8|Q53FA8_HUMAN trm|Q6NR84|Q6NR84_HUMAN	Chromogranin A precursor (CgA) (Pituitary secretory protein I) (SP-I) [Contains: Vasostatin-1 (Vasostatin I); Vasostatin-2 (Vasostatin II); EA-92; ES-43; Pancreastatin; SS-18; WA-8; WE-14; LF-19; AL-11; GV-19; GR-44; ER-37] Chromogranin A variant (Fragment) Chromogranin A (Parathyroid secretory protein 1)	1	1.13	2	3.066
7 155	trm|Q0JUL0|Q0JUL0_HUMAN spt|P42330|AK1C3_HUMAN	Hypothetical protein AKR1C3 (Fragment) "Aldo-keto reductase family 1 member C3 (EC 1.-.-.-) (Trans-1,2- dihydrobenzene-1,2-diol dehydrogenase) (EC 1.3.1.20) (3-alpha- hydroxysteroid dehydrogenase type 2) (EC 1.1.1.213) (3-alpha-HSD type 2) (3-alpha-HSD type II, brain) (Prostaglandin F synthase) (EC 1.1.1.188) (PGFS) (Estradiol 17-beta-dehydrogenase) (EC 1.1.1.62) (17-beta-hydroxysteroid dehydroge…	1	1.105	2	1.947
7 159	trm|Q6IB71|Q6IB71_HUMAN spt|P25788|PSA3_HUMAN	Proteasome subunit alpha type (EC 3.4.25.1) Proteasome subunit alpha type 3 (EC 3.4.25.1) (Proteasome component C8) (Macropain subunit C8) (Multicatalytic endopeptidase complex subunit C8)	5	1	4	1.199	1.969	0.05
7 190	trm|Q3B7X5|Q3B7X5_HUMAN	Hypothetical protein (Fragment)	0		0
7 210	spt|Q14103|HNRPD_HUMAN	Heterogeneous nuclear ribonucleoprotein D0 (hnRNP D0) (AU-rich element RNA-binding protein 1)	4	1.062	5	1.185	0.731	0.25
7 211	spt|P51665|PSD7_HUMAN	26S proteasome non-ATPase regulatory subunit 7 (26S proteasome regulatory subunit rpn8) (26S proteasome regulatory subunit S12) (Proteasome subunit p40) (Mov34 protein homolog)	1	1.283	2	1.592
7 226	trm|Q6NVY0|Q6NVY0_HUMAN spt|Q9HB71|CYBP_HUMAN	Calcyclin binding protein Calcyclin-binding protein (CacyBP) (hCacyBP) (Siah-interacting protein) (S100A6-binding protein)	1	1.249	2	1.702
7 229	trm|Q99475|Q99475_HUMAN trm|Q9UES8|Q9UES8_HUMAN spt|Q16881|TRXR1_HUMAN	KM-102-derived reductase-like factor Thioredoxin reductase GRIM-12 "Thioredoxin reductase 1, cytoplasmic precursor (EC 1.8.1.9) (TR) (TR1) "	1	0.706	2	0.982
7 242	trm|Q6S376|Q6S376_HUMAN	Plectin 11	1	0.81	2	0.785
7 244	trm|Q4VB24|Q4VB24_HUMAN spt|P10412|H14_HUMAN trm|Q4VB25|Q4VB25_HUMAN	Histone 1, H1e Histone H1.4 (Histone H1b) "Histone 1, H1e "	0		0
7 25	trm|Q7Z5W1|Q7Z5W1_HUMAN	IGHG1 protein	1	0.554	2	0.587
7 251	spt|Q9P2M7|CING_HUMAN	Cingulin	1	0.968	2	0.881
7 252	spt|P80362|KV1Y_HUMAN	Ig kappa chain V-I region WAT	1	0.75	2	0.523
7 253	spt|P14649|MYL6B_HUMAN	Myosin light polypeptide 6B (Smooth muscle and nonmuscle myosin light chain alkali 6B) (Myosin light chain 1 slow-twitch muscle A isoform) (MLC1sa)	1	1.337	2	0.931
7 258	spt|P23381|SYW_HUMAN trm|Q502Y0|Q502Y0_HUMAN	Tryptophanyl-tRNA synthetase (EC 6.1.1.2) (Tryptophan--tRNA ligase) (TrpRS) (IFP53) (hWRS) WARS protein	6	0.927	3	1.291	3.071	0.01
7 259	spt|Q7Z406|MYH14_HUMAN	Myosin-14 (Myosin heavy chain, nonmuscle IIc) (Nonmuscle myosin heavy chain IIc) (NMHC II-C)	1	1.311	2	1.01
7 261	spt|Q02790|FKBP4_HUMAN	FK506-binding protein 4 (EC 5.2.1.8) (Peptidyl-prolyl cis-trans isomerase) (PPIase) (Rotamase) (p59 protein) (HSP-binding immunophilin) (HBI) (FKBP52 protein) (52 kDa FK506-binding protein) (FKBP59)	5	1.003	3	0.788	-1.352	0.15
7 263	trm|Q59EQ2|Q59EQ2_HUMAN	Tyrosine 3-monooxygenase/tryptophan 5-monooxygenase activation protein, beta polypeptide variant (Fragment)	0		2	0.541
7 269	spt|P34932|HSP74_HUMAN trm|Q2TAL4|Q2TAL4_HUMAN	Heat shock 70 kDa protein 4 (Heat shock 70-related protein APG-2) (HSP70RY) Heat shock 70kDa protein 4	7	0.898	5	0.944	0.177	1
7 273	spt|P28001|H2A1E_HUMAN spt|Q7L7L0|H2A3_HUMAN spt|Q93077|H2A1C_HUMAN spt|P04908|H2A1B_HUMAN	Histone H2A type 1-E (H2A.2) (H2A/m) Histone H2A type 3 Histone H2A type 1-C Histone H2A type 1-B	1	1.152	2	1.675
7 274	spt|Q9H910|HN1L_HUMAN trm|Q4VXZ5|Q4VXZ5_HUMAN trm|Q4VXZ6|Q4VXZ6_HUMAN	Hematological and neurological expressed 1-like protein (HN1-like protein) OTTHUMP00000045527 (Fragment) OTTHUMP00000045526 (Fragment)	1	0.71	2	0.964
7 279	spt|Q14157|UBP2L_HUMAN	Ubiquitin-associated protein 2-like (Protein NICE-4)	1	1.045	2	1.37
7 280	trm|Q9NQU0|Q9NQU0_HUMAN	Testes-specific heterogenous nuclear ribonucleoprotein G-T (Fragment)	1	0.867	2	0.992
7 283	spt|Q09028|RBBP4_HUMAN	Histone-binding protein RBBP4 (Retinoblastoma-binding protein 4) (RBBP-4) (Retinoblastoma-binding protein p48) (Chromatin assembly factor 1 subunit C) (CAF-1 subunit C) (Chromatin assembly factor I p48 subunit) (CAF-I 48 kDa subunit) (CAF-I p48) (Nucleosome remodeling factor subunit RBAP48)	1	0.854	2	1.175
7 284	spt|Q9BUQ8|DDX23_HUMAN	Probable ATP-dependent RNA helicase DDX23 (EC 3.6.1.-) (DEAD box protein 23) (100 kDa U5 snRNP-specific protein) (U5-100kD) (PRP28 homolog)	1	1	2	1.278
7 287	spt|Q9UKM9|RALY_HUMAN trm|Q53GL6|Q53GL6_HUMAN trm|Q5QPL9|Q5QPL9_HUMAN trm|Q5QPM0|Q5QPM0_HUMAN trm|Q5QPM1|Q5QPM1_HUMAN trm|Q8N1C2|Q8N1C2_HUMAN	RNA-binding protein Raly (hnRNP associated with lethal yellow homolog) (Autoantigen p542) "RNA binding protein (Autoantigenic, hnRNP-associated with lethal yellow) long isoform variant (RNA binding protein, autoantigenic) (HnRNP-associated with lethal yellow homolog (Mouse)) (Fragment) " OTTHUMP00000030678 (Fragment) OTTHUMP00000030677 (Fragment) OTTHUMP00000030676 (Fragment) LOC138046 protein	0		0
7 288	trm|Q6IBR2|Q6IBR2_HUMAN spt|Q9Y285|SYFA_HUMAN	FARSLA protein Phenylalanyl-tRNA synthetase alpha chain (EC 6.1.1.20) (Phenylalanine--tRNA ligase alpha chain) (PheRS) (CML33)	3	1.094	3	0.657	-2.494	0.05
7 289	spt|P55036|PSMD4_HUMAN	26S proteasome non-ATPase regulatory subunit 4 (26S proteasome regulatory subunit S5A) (Rpn10) (Multiubiquitin chain-binding protein) (Antisecretory factor 1) (AF) (ASF)	1	1.229	2	1.383
7 290	spt|Q14160|LAP4_HUMAN	Protein LAP4 (Protein scribble homolog) (hScrib)	0		1	0.07
7 297	trm|Q7Z5W9|Q7Z5W9_HUMAN	TCOF1 protein (Fragment)	1	0.734	2	1.007
7 301	spt|Q9UBE0|ULE1A_HUMAN	Ubiquitin-like 1-activating enzyme E1A (SUMO-1-activating enzyme subunit 1)	0		1	0.084
7 302	spt|P28072|PSB6_HUMAN	Proteasome subunit beta type 6 precursor (EC 3.4.25.1) (Proteasome delta chain) (Macropain delta chain) (Multicatalytic endopeptidase complex delta chain) (Proteasome subunit Y)	7	1.012	5	1.341	3.432	0.005
7 303	spt|P01616|KV2C_HUMAN	Ig kappa chain V-II region MIL	1	0.678	2	0.434
7 315	spt|Q12765|SCRN1_HUMAN	Secernin-1	0		0
7 317	spt|P09493|TPM1_HUMAN	Tropomyosin 1 alpha chain (Alpha-tropomyosin)	1	2.093	2	0.438
7 321	trm|Q8N355|Q8N355_HUMAN	IGLC1 protein	4	0.9	2	0.626
7 328	spt|P62266|RS23_HUMAN	40S ribosomal protein S23	0		1	0.108
7 329	trm|Q6FHK7|Q6FHK7_HUMAN spt|P61289|PSME3_HUMAN	PSME3 protein Proteasome activator complex subunit 3 (Proteasome activator 28-gamma subunit) (PA28gamma) (PA28g) (Activator of multicatalytic protease subunit 3) (11S regulator complex subunit gamma) (REG-gamma) (Ki nuclear autoantigen)	1	0.987	2	1.238
7 332	spt|Q16204|CCDC6_HUMAN trm|Q6GSG7|Q6GSG7_HUMAN	Coiled-coil domain-containing protein 6 (H4 protein) (Papillary thyroid carcinoma-encoded protein) Coiled-coil domain containing 6	1	0.95	2	1.497
7 342	spt|P49903|SPS1_HUMAN trm|Q5T5U9|Q5T5U9_HUMAN	Selenide, water dikinase 1 (EC 2.7.9.3) (Selenophosphate synthetase 1) (Selenium donor protein 1) Selenophosphate synthetase 1	0		0
7 348	spt|P04196|HRG_HUMAN trm|Q68DR3|Q68DR3_HUMAN	Histidine-rich glycoprotein precursor (Histidine-proline-rich glycoprotein) (HPRG) Hypothetical protein DKFZp779H1622 (Fragment)	5	1.125	2	0.899
7 356	spt|P31944|CASPE_HUMAN	Caspase-14 precursor (EC 3.4.22.-) (CASP-14) [Contains: Caspase-14 subunit 1; Caspase-14 subunit 2]	1	1.358	2	2.527
7 357	trm|Q9UL71|Q9UL71_HUMAN trm|Q9UL90|Q9UL90_HUMAN	Myosin-reactive immunoglobulin heavy chain variable region (Fragment) Myosin-reactive immunoglobulin heavy chain variable region (Fragment)	1	1.195	1	0.819
7 364	spt|P05230|FGF1_HUMAN trm|Q6LBM3|Q6LBM3_HUMAN	Heparin-binding growth factor 1 precursor (HBGF-1) (Acidic fibroblast growth factor) (aFGF) (Beta-endothelial cell growth factor) (ECGF- beta) Fibroblast growth factor	0		0
7 376	spt|P00966|ASSY_HUMAN trm|Q5T6L5|Q5T6L5_HUMAN trm|Q5T6L6|Q5T6L6_HUMAN	Argininosuccinate synthase (EC 6.3.4.5) (Citrulline--aspartate ligase) Argininosuccinate synthetase (Fragment) Argininosuccinate synthase (EC 6.3.4.5) (Citrulline--aspartate ligase) (Fragment)	0		1	0.065
7 377	spt|Q8IZP2|F10A4_HUMAN	Protein FAM10A4	4	0.742	2	0.666
7 389	trm|Q59HE3|Q59HE3_HUMAN	Calpastatin isoform a variant (Fragment)	1	0.835	2	0.559
7 390	spt|O14529|CUTL2_HUMAN	Homeobox protein cut-like 2 (Homeobox protein Cux-2) (Cut-like 2)	2	0.645	4	0.86
7 391	spt|Q9BTC0|DIDO1_HUMAN	Death-inducer obliterator 1 (DIO-1) (Death-associated transcription factor 1) (DATF-1) (hDido1)	0		0
7 394	spt|Q9NSE4|SYIM_HUMAN	Isoleucyl-tRNA synthetase, mitochondrial precursor (EC 6.1.1.5) (Isoleucine--tRNA ligase) (IleRS)	0		0
7 396	spt|P53367|ARFP1_HUMAN trm|Q8N8M9|Q8N8M9_HUMAN trm|Q2M2X4|Q2M2X4_HUMAN	Arfaptin-1 (ADP-ribosylation factor-interacting protein 1) "CDNA FLJ39190 fis, clone OCBBF2004647, highly similar to ARFAPTIN 1 " ADP-ribosylation factor interacting protein 1 (Arfaptin 1)	0		0
7 397	trm|Q0JSN2|Q0JSN2_HUMAN	Hypothetical protein ENO1 (Fragment)	3	0.943	6	0.936	-0.053	1
7 400	spt|Q9UK76|HN1_HUMAN	Hematological and neurological expressed 1 protein (Androgen-regulated protein 2)	0		0
7 405	trm|Q567P1|Q567P1_HUMAN	IGLC2 protein	0		0
7 406	trm|Q5TDH0|Q5TDH0_HUMAN trm|Q7RTZ0|Q7RTZ0_HUMAN trm|Q9BRT1|Q9BRT1_HUMAN	DNA-damage inducible protein 2 (DDI2) DNA-damage inducible protein 2 DDI2 protein	1	1.044	2	1.174
7 407	trm|Q86TU7|Q86TU7_HUMAN	Full-length cDNA clone CS0DI069YD09 of Placenta of Homo sapiens (human)	0		1	1.227
7 409	trm|Q59F94|Q59F94_HUMAN spt|Q9NRR5|UBQL4_HUMAN	Ataxin-1 ubiquitin-like interacting protein variant (Fragment) Ubiquilin-4 (Ataxin-1 ubiquitin-like-interacting protein A1U)	0		0
7 49	spt|P69905|HBA_HUMAN	Hemoglobin subunit alpha (Hemoglobin alpha chain) (Alpha-globin)	10	0.927	10	0.553	-2.901	0.005
7 57	spt|P62328|TYB4_HUMAN	Thymosin beta-4 (T beta 4) (Fx) [Contains: Hematopoietic system regulatory peptide (Seraspenide)]	1	0.999	2	0.884
7 67	spt|P10696|PPBN_HUMAN trm|Q53S81|Q53S81_HUMAN	Alkaline phosphatase, placental-like precursor (EC 3.1.3.1) (Nagao isozyme) (Germ-cell alkaline phosphatase) (GCAP) (PLAP-like) (ALP-1) Hypothetical protein ALPPL2	1	1.019	2	3.251
7 85	spt|P27816|MAP4_HUMAN	Microtubule-associated protein 4 (MAP 4)	1	1.083	2	0.585
8 106	trm|Q5EFE5|Q5EFE5_HUMAN	Anti-RhD monoclonal T125 gamma1 heavy chain precursor	2	0.954	1	0.411
8 125	trm|Q2QD06|Q2QD06_HUMAN	RcTPM3 (Fragment)	2	0.756	4	0.578
8 132	spt|Q9UH65|SWP70_HUMAN	Switch-associated protein 70 (SWAP-70)	0		0
8 143	trm|Q6N091|Q6N091_HUMAN	Hypothetical protein DKFZp686C02220 (Fragment)	0		0
8 146	spt|Q9Y281|COF2_HUMAN	Cofilin-2 (Cofilin, muscle isoform)	4	0.955	2	0.929
8 149	spt|P01701|LV1C_HUMAN spt|P06316|LV1G_HUMAN	Ig lambda chain V-I region NEW Ig lambda chain V-I region BL2 precursor	0		0
8 37	trm|Q0P5U7|Q0P5U7_HUMAN	TMSB4X protein (Fragment)	1	1.083	2	0.889
9 142	trm|Q59G12|Q59G12_HUMAN	Lamina-associated polypeptide 2, isoforms beta/gamma variant (Fragment)	1	1.116	2	2.555
9 158	spt|P49189|AL9A1_HUMAN	4-trimethylaminobutyraldehyde dehydrogenase (EC 1.2.1.47) (TMABADH) (Aldehyde dehydrogenase 9A1) (EC 1.2.1.3) (Aldehyde dehydrogenase E3 isozyme) (Gamma-aminobutyraldehyde dehydrogenase) (EC 1.2.1.19) (R- aminobutyraldehyde dehydrogenase)	4	1.069	2	0.983
9 160	trm|Q71UF1|Q71UF1_HUMAN	Aconitase	3	1.058	6	0.912	-1.128	0.15
9 166	trm|Q5SSJ5|Q5SSJ5_HUMAN trm|Q9UHY0|Q9UHY0_HUMAN	HP1-BP74 HP1-BP74 protein	1	1.093	2	1.426
9 174	spt|Q15149|PLEC1_HUMAN	Plectin-1 (PLTN) (PCN) (Hemidesmosomal protein 1) (HD1)	0		0
9 190	trm|Q65ZQ3|Q65ZQ3_HUMAN	FBRNP	4	0.945	2	1.235
9 192	spt|P46926|GNPI_HUMAN	Glucosamine-6-phosphate isomerase (EC 3.5.99.6) (Glucosamine-6- phosphate deaminase) (GNPDA) (GlcN6P deaminase) (Oscillin)	1	1.434	2	1.542
9 197	trm|Q3MJ42|Q3MJ42_HUMAN spt|P16401|H15_HUMAN	H1 histone family, member 5 (Histone 1, H1b) Histone H1.5 (Histone H1a)	0		1	0.124
9 202	trm|Q8WU38|Q8WU38_HUMAN	IGHD protein	1	0.939	2	1.027
9 203	spt|Q9NYC9|DYH9_HUMAN	Ciliary dynein heavy chain 9 (Axonemal beta dynein heavy chain 9)	1	1.076	2	0.975
9 205	spt|Q14643|ITPR1_HUMAN	Inositol 1,4,5-trisphosphate receptor type 1 (Type 1 inositol 1,4,5- trisphosphate receptor) (Type 1 InsP3 receptor) (IP3 receptor isoform 1) (InsP3R1) (IP3R)	1	1.205	2	1.465
9 212	spt|Q9UKN7|MYO15_HUMAN	Myosin-15 (Myosin XV) (Unconventional myosin-15)	1	0.93	2	0.999
9 214	trm|Q86TP5|Q86TP5_HUMAN	ENO1P protein	0		1	5.264
9 216	spt|Q9BX68|HINT2_HUMAN	Histidine triad nucleotide-binding protein 2 (EC 3.-.-.-) (HINT-2) (HINT-3) (HIT-17kDa) (PKCI-1-related HIT protein)	0		0
9 217	spt|Q9H9S5|FKRP_HUMAN	Fukutin-related protein (EC 2.-.-.-)	1	1.125	2	1.262
9 223	trm|Q9ULI4|Q9ULI4_HUMAN	KIAA1236 protein (Fragment)	1	1.022	2	1.091
9 236	trm|Q549R7|Q549R7_HUMAN	Mutant desmin	1	1.001	2	0.952
9 247	spt|P01597|KV1E_HUMAN	Ig kappa chain V-I region DEE	1	0.907	2	0.634
9 248	trm|Q96QS0|Q96QS0_HUMAN	Putative matrix cell adhesion molecule-3	1	0.865	2	0.665
9 254	spt|Q8N2E6|TOR2X_HUMAN	Prosalusin precursor (Torsin-2A) (Torsin family 2 member A) [Contains: Salusin-alpha; Salusin-beta]	0		0
9 262	spt|Q12962|TAF10_HUMAN	Transcription initiation factor TFIID subunit 10 (Transcription initiation factor TFIID 30 kDa subunit) (TAF(II)30) (TAFII-30) (TAFII30) (STAF28)	0		0
9 276	trm|Q3LIA5|Q3LIA5_HUMAN trm|Q75L23|Q75L23_HUMAN spt|P35998|PRS7_HUMAN	Hypothetical protein Nbla10058 Hypothetical protein PSMC2 (Fragment) 26S protease regulatory subunit 7 (Proteasome 26S subunit ATPase 2) (Protein MSS1)	1	0.492	2	0.858
9 278	trm|Q9BTE6|Q9BTE6_HUMAN	Alanyl-tRNA synthetase domain containing 1	1	0.796	2	0.78
9 28	trm|Q8WU19|Q8WU19_HUMAN	K-ALPHA-1 protein	4	1	2	0.472
9 288	spt|O43237|DC1L2_HUMAN	Cytoplasmic dynein 1 light intermediate chain 2 (Dynein light intermediate chain 2, cytosolic) (LIC53/55) (LIC-2)	1	1.118	2	1.289
9 298	spt|Q9H9Q2|CSN7B_HUMAN	COP9 signalosome complex subunit 7b (Signalosome subunit 7b) (SGN7b) (JAB1-containing signalosome subunit 7b)	1	0.718	2	0.951
9 30	spt|P09211|GSTP1_HUMAN	Glutathione S-transferase P (EC 2.5.1.18) (GST class-pi) (GSTP1-1)	3	1	3	1.357	2.039	0.1
9 302	spt|O43684|BUB3_HUMAN	Mitotic checkpoint protein BUB3	0		0
9 305	spt|Q9UG22|GIMA2_HUMAN	GTPase, IMAP family member 2 (Immunity-associated protein 2) (hIMAP2)	1	0.787	2	0.724
9 315	trm|Q6P4I0|Q6P4I0_HUMAN spt|P62306|RUXF_HUMAN	SNRPF protein (Fragment) Small nuclear ribonucleoprotein F (snRNP-F) (Sm protein F) (Sm-F) (SmF)	0		1	0.559
9 328	trm|Q8TDA3|Q8TDA3_HUMAN trm|Q5VY92|Q5VY92_HUMAN trm|Q5VY93|Q5VY93_HUMAN spt|Q92974|ARHG2_HUMAN trm|Q9H023|Q9H023_HUMAN trm|Q8WUG4|Q8WUG4_HUMAN	Guanine nucleotide exchange factor GEF-H1 (Rho\/rac guanine nucleotide exchange factor (GEF) 2) Rho\/rac guanine nucleotide exchange factor (GEF) 2 Rho\/rac guanine nucleotide exchange factor (GEF) 2 Rho/Rac guanine nucleotide exchange factor 2 (GEF-H1 protein) (Proliferating cell nucleolar antigen p40) Hypothetical protein DKFZp547L106 (Hypothetical protein ARHGEF2) (Rho\/rac guanine nucleotide …	1	0.852	2	1.393
9 329	spt|Q7Z6Z7|HUWE1_HUMAN trm|Q5H924|Q5H924_HUMAN	HECT, UBA and WWE domain-containing protein 1 (EC 6.3.2.-) (E3 ubiquitin protein ligase URE-B1) (Mcl-1 ubiquitin ligase E3) (Mule) (ARF-binding protein 1) (ARF-BP1) Upstream regulatory element binding protein 1 (UREB1) (Fragment)	1	1.189	2	1.173
9 330	trm|Q7RTU8|Q7RTU8_HUMAN	Harmonin isoform b3	0		0
9 331	trm|Q6MZX7|Q6MZX7_HUMAN	Hypothetical protein DKFZp686M24218	3	0.981	0
9 333	trm|Q9BVN4|Q9BVN4_HUMAN trm|Q9NXD9|Q9NXD9_HUMAN	NSUN2 protein (Fragment) "CDNA FLJ20303 fis, clone HEP06676 "	0		0
9 334	trm|Q96CG0|Q96CG0_HUMAN spt|P17813|EGLN_HUMAN trm|Q5T9B9|Q5T9B9_HUMAN	ENG protein (Endoglin) (Osler-Rendu-Weber syndrome 1) Endoglin precursor (CD105 antigen) Endoglin (Osler-Rendu-Weber syndrome 1)	0		0
9 341	trm|Q4VB99|Q4VB99_HUMAN trm|Q4VBA1|Q4VBA1_HUMAN trm|Q4KKX1|Q4KKX1_HUMAN	Sterol O-acyltransferase 2 Sterol O-acyltransferase 2 SOAT2 protein	1	1.355	2	1.302
9 342	trm|O95996|O95996_HUMAN trm|Q9UEM8|Q9UEM8_HUMAN	APCL protein APC2 protein (Fragment)	1	0.618	2	0.437
9 343	trm|Q96IJ6|Q96IJ6_HUMAN trm|Q53GI0|Q53GI0_HUMAN trm|Q9NWC3|Q9NWC3_HUMAN	GDP-mannose pyrophosphorylase A (Hypothetical protein tmp_locus_11) GDP-mannose pyrophosphorylase A variant (Fragment) "CDNA FLJ10137 fis, clone HEMBA1003136, weakly similar to MANNOSE-1- PHOSPHATE GUANYLTRANSFERASE (EC 2.7.7.13) "	1	0.45	2	1.03
9 349	trm|Q8NCF5|Q8NCF5_HUMAN trm|Q8NFR2|Q8NFR2_HUMAN	CDNA FLJ90280 fis, clone NT2RP1000465, similar to UBIQUITIN-LIKE PROTEIN SMT3 (Nuclear factor of activated T-cells, cytoplasmic, calcineurin-dependent 2 interacting protein) Hypothetical protein	0		0
9 353	trm|Q5TAN3|Q5TAN3_HUMAN	Peptidyl-prolyl cis-trans isomerase (EC 5.2.1.8)	0		0
9 355	trm|Q7Z5Z5|Q7Z5Z5_HUMAN	NPC-A-12	0		0
9 356	trm|Q96PY5|Q96PY5_HUMAN	KIAA1902 protein (Fragment)	1	0.653	2	0.484
9 357	trm|Q1MSJ5|Q1MSJ5_HUMAN trm|Q70F00|Q70F00_HUMAN	Centrosome and spindle pole associated protein 1 Centrosome spindle pole associated protein	0		0
9 359	spt|Q9BQ39|DDX50_HUMAN	ATP-dependent RNA helicase DDX50 (EC 3.6.1.-) (DEAD box protein 50) (Nucleolar protein Gu2) (Gu-beta)	1	1.251	4	0.794
9 361	spt|Q9Y5Y9|SC10A_HUMAN	Sodium channel protein type 10 subunit alpha (Sodium channel protein type X subunit alpha) (Voltage-gated sodium channel subunit alpha Nav1.8) (Peripheral nerve sodium channel 3) (hPN3)	2	0.813	4	1.072
9 362	trm|Q2M5E1|Q2M5E1_HUMAN spt|O14578|CTRO_HUMAN	Citron "Citron Rho-interacting kinase (EC 2.7.11.1) (CRIK) (Rho-interacting, serine/threonine-protein kinase 21) "	1	0.718	2	0.753
9 365	spt|O94989|ARHGF_HUMAN	Rho guanine nucleotide exchange factor 15 (Vsm-RhoGEF)	1	1.013	2	1.22
9 366	trm|Q59EK1|Q59EK1_HUMAN spt|Q9UEY8|ADDG_HUMAN trm|Q5VU09|Q5VU09_HUMAN	Adducin 3 isoform a variant (Fragment) Gamma-adducin (Adducin-like protein 70) Adducin 3 (Gamma) (Hypothetical protein DKFZp686O0853)	0		1	0.096
9 367	trm|Q8NA68|Q8NA68_HUMAN	CDNA FLJ35785 fis, clone TESTI2005603, moderately similar to Homo sapiens 88-kDa Golgi protein (GM88) mRNA	1	0.718	2	0.656
9 373	trm|Q5VVU0|Q5VVU0_HUMAN	Outer dense fiber of sperm tails 2	0		0
9 374	trm|Q9BQ83|Q9BQ83_HUMAN trm|Q6NTG6|Q6NTG6_HUMAN trm|Q9H5H2|Q9H5H2_HUMAN	GIY-YIG domain containing 2 GIY-YIG domain containing 2 "CDNA: FLJ23439 fis, clone HSI00184 "	0		0
9 378	trm|Q5SXN4|Q5SXN4_HUMAN trm|Q5SXN3|Q5SXN3_HUMAN	Serologically defined colon cancer antigen 3 (Fragment) Serologically defined colon cancer antigen 3 (Fragment)	1	1.019	2	1.029
9 379	trm|Q5JV73|Q5JV73_HUMAN	Novel protein (Fragment)	1	0.655	2	0.684
9 386	trm|Q6PF15|Q6PF15_HUMAN	FLJ33790 protein (Fragment)	0		0
9 387	trm|Q6P2P2|Q6P2P2_HUMAN trm|Q8N383|Q8N383_HUMAN	Hypothetical protein LOC90826 LOC90826 protein (Fragment)	0		0
9 390	trm|Q6IBK9|Q6IBK9_HUMAN spt|P14317|HCLS1_HUMAN	HCLS1 protein Hematopoietic lineage cell-specific protein (Hematopoietic cell- specific LYN substrate 1) (LckBP1) (p75)	1	1.479	2	3.29
9 61	trm|Q6NSB4|Q6NSB4_HUMAN	HP protein	6	0.875	8	0.695	-1.717	0.1
9 99	trm|Q3ZCS4|Q3ZCS4_HUMAN spt|Q9H361|PABP3_HUMAN trm|Q2VIP3|Q2VIP3_HUMAN	Poly(A) binding protein, cytoplasmic 3 Polyadenylate-binding protein 3 (Poly(A)-binding protein 3) (PABP 3) (Testis-specific poly(A)-binding protein) PABP3 (Fragment)	3	0.975	3	1.084	0.198	1
			Count ratios	1232	Count ratios	1260
			Count empty	297	Count empty	269
