# Supplementary material for: Identification of Novel Molecular Targets for Endometrial Cancer Using a Drill-Down LC-MS/MS Approach with iTRAQ
Source: PLoS One. 2011 Jan 31;6(1):e16352. doi: 10.1371/journal.pone.0016352 (PMC3031560; doi:10.1371/journal.pone.0016352)
Supplement: Table S3 — Confidence of identified peptides. A - Identified peptides whose Proteinpilot confidence was greater than 95%. Proteins identified by a single peptide were sorted on top of the table. #Occurences = number of times a particular peptide has been identified over all sample sets. At the bottom of this table, summary of the number of peptides per proteins. B - Identified peptides whose Proteinpilot confidence was greater than 99%. (XLS) [file pone.0016352.s005.xls]

## Sheet: S3A - Peptides_confidences >=95
A - Identified peptides whose Proteinpilot confidence was greater than 95%
Proteins identified by a single peptide were sorted on top of the table
#Occurences = number of times a particular peptide has been identified over all sample sets
A summary of the numbers of peptides per proteins has been provided at the bottom of this table.
Protein Number	Accession	Protein Name	Peptide	#Occurences	Highest Confidence	Single peptide
1	trm|Q5HY55|Q5HY55_HUMAN	"Filamin A, alpha (Actin binding protein 280) "	AEAGVPAEFSIWTR	13	99
1	trm|Q5HY55|Q5HY55_HUMAN	"Filamin A, alpha (Actin binding protein 280) "	AEFTVETR	14	99
1	trm|Q5HY55|Q5HY55_HUMAN	"Filamin A, alpha (Actin binding protein 280) "	AEISFEDR	6	99
1	trm|Q5HY55|Q5HY55_HUMAN	"Filamin A, alpha (Actin binding protein 280) "	AEISFEDRK	9	99
1	trm|Q5HY55|Q5HY55_HUMAN	"Filamin A, alpha (Actin binding protein 280) "	AFGPGLQGGSAGSPAR	20	99
1	trm|Q5HY55|Q5HY55_HUMAN	"Filamin A, alpha (Actin binding protein 280) "	AFGPGLQGGSAGSPARFTIDTK	13	99
1	trm|Q5HY55|Q5HY55_HUMAN	"Filamin A, alpha (Actin binding protein 280) "	AGGPGLER	8	99
1	trm|Q5HY55|Q5HY55_HUMAN	"Filamin A, alpha (Actin binding protein 280) "	AGNNMLLVGVHGPR	13	99
1	trm|Q5HY55|Q5HY55_HUMAN	"Filamin A, alpha (Actin binding protein 280) "	AGQSAAGAAPGGGVDTR	19	99
1	trm|Q5HY55|Q5HY55_HUMAN	"Filamin A, alpha (Actin binding protein 280) "	AGVAPLQVK	18	99
1	trm|Q5HY55|Q5HY55_HUMAN	"Filamin A, alpha (Actin binding protein 280) "	AHVVPCFDASK	8	99
1	trm|Q5HY55|Q5HY55_HUMAN	"Filamin A, alpha (Actin binding protein 280) "	ALTQTGGPHVK	15	99
1	trm|Q5HY55|Q5HY55_HUMAN	"Filamin A, alpha (Actin binding protein 280) "	ANLPQSFQVDTSK	10	99
1	trm|Q5HY55|Q5HY55_HUMAN	"Filamin A, alpha (Actin binding protein 280) "	ASGPGLNTTGVPASLPVEFTIDAK	12	99
1	trm|Q5HY55|Q5HY55_HUMAN	"Filamin A, alpha (Actin binding protein 280) "	ATCAPQHGAPGPGPADASK	10	99
1	trm|Q5HY55|Q5HY55_HUMAN	"Filamin A, alpha (Actin binding protein 280) "	AWGPGLEGGVVGK	12	99
1	trm|Q5HY55|Q5HY55_HUMAN	"Filamin A, alpha (Actin binding protein 280) "	AYGPGIEPTGNMVK	15	99
1	trm|Q5HY55|Q5HY55_HUMAN	"Filamin A, alpha (Actin binding protein 280) "	CAPGVVGPAEADIDFDIIR	13	99
1	trm|Q5HY55|Q5HY55_HUMAN	"Filamin A, alpha (Actin binding protein 280) "	CSGPGLER	8	99
1	trm|Q5HY55|Q5HY55_HUMAN	"Filamin A, alpha (Actin binding protein 280) "	CSGPGLSPGMVR	4	99
1	trm|Q5HY55|Q5HY55_HUMAN	"Filamin A, alpha (Actin binding protein 280) "	CSYQPTMEGVHTVHVTFAGVPIPR	6	99
1	trm|Q5HY55|Q5HY55_HUMAN	"Filamin A, alpha (Actin binding protein 280) "	DAEMPATEKDLAEDAPWKK	2	99
1	trm|Q5HY55|Q5HY55_HUMAN	"Filamin A, alpha (Actin binding protein 280) "	DAGEGGLSLAIEGPSK	9	99
1	trm|Q5HY55|Q5HY55_HUMAN	"Filamin A, alpha (Actin binding protein 280) "	DAGEGLLAVQITDPEGKPK	12	99
1	trm|Q5HY55|Q5HY55_HUMAN	"Filamin A, alpha (Actin binding protein 280) "	DAPQDFHPDR	11	99
1	trm|Q5HY55|Q5HY55_HUMAN	"Filamin A, alpha (Actin binding protein 280) "	DGSCGVAYVVQEPGDYEVSVK	4	99
1	trm|Q5HY55|Q5HY55_HUMAN	"Filamin A, alpha (Actin binding protein 280) "	DKGEYTLVVK	7	99
1	trm|Q5HY55|Q5HY55_HUMAN	"Filamin A, alpha (Actin binding protein 280) "	DNGNGTYSCSYVPR	4	99
1	trm|Q5HY55|Q5HY55_HUMAN	"Filamin A, alpha (Actin binding protein 280) "	DVDIIDHHDNTYTVK	8	99
1	trm|Q5HY55|Q5HY55_HUMAN	"Filamin A, alpha (Actin binding protein 280) "	EAGAGGLAIAVEGPSK	14	99
1	trm|Q5HY55|Q5HY55_HUMAN	"Filamin A, alpha (Actin binding protein 280) "	EATTEFSVDAR	14	99
1	trm|Q5HY55|Q5HY55_HUMAN	"Filamin A, alpha (Actin binding protein 280) "	EGPYSISVLYGDEEVPR	9	99
1	trm|Q5HY55|Q5HY55_HUMAN	"Filamin A, alpha (Actin binding protein 280) "	ETGEHLVHVK	5	99
1	trm|Q5HY55|Q5HY55_HUMAN	"Filamin A, alpha (Actin binding protein 280) "	FGGEHVPNSPFQVTALAGDQPSVQPPLR	8	99
1	trm|Q5HY55|Q5HY55_HUMAN	"Filamin A, alpha (Actin binding protein 280) "	FNEEHIPDSPFVVPVASPSGDAR	13	99
1	trm|Q5HY55|Q5HY55_HUMAN	"Filamin A, alpha (Actin binding protein 280) "	FNGTHIPGSPFK	15	99
1	trm|Q5HY55|Q5HY55_HUMAN	"Filamin A, alpha (Actin binding protein 280) "	GAGSGELK	2	99
1	trm|Q5HY55|Q5HY55_HUMAN	"Filamin A, alpha (Actin binding protein 280) "	GAGTGGLGLAVEGPSEAK	14	99
1	trm|Q5HY55|Q5HY55_HUMAN	"Filamin A, alpha (Actin binding protein 280) "	GKLDVQFSGLTK	5	99
1	trm|Q5HY55|Q5HY55_HUMAN	"Filamin A, alpha (Actin binding protein 280) "	GLVEPVDVVDNADGTQTVNYVPSR	18	99
1	trm|Q5HY55|Q5HY55_HUMAN	"Filamin A, alpha (Actin binding protein 280) "	GQHVPGSPFQFTVGPLGEGGAHK	7	99
1	trm|Q5HY55|Q5HY55_HUMAN	"Filamin A, alpha (Actin binding protein 280) "	GTVEPQLEAR	15	99
1	trm|Q5HY55|Q5HY55_HUMAN	"Filamin A, alpha (Actin binding protein 280) "	HTAMVSWGGVSIPNSPFR	9	99
1	trm|Q5HY55|Q5HY55_HUMAN	"Filamin A, alpha (Actin binding protein 280) "	IANLQTDLSDGLR	15	99
1	trm|Q5HY55|Q5HY55_HUMAN	"Filamin A, alpha (Actin binding protein 280) "	IECDDKGDGSCDVR	2	99
1	trm|Q5HY55|Q5HY55_HUMAN	"Filamin A, alpha (Actin binding protein 280) "	IKVSGLGEK	11	99
1	trm|Q5HY55|Q5HY55_HUMAN	"Filamin A, alpha (Actin binding protein 280) "	IQQNTFTR	11	99
1	trm|Q5HY55|Q5HY55_HUMAN	"Filamin A, alpha (Actin binding protein 280) "	IVGPSGAAVPCK	10	99
1	trm|Q5HY55|Q5HY55_HUMAN	"Filamin A, alpha (Actin binding protein 280) "	IVGPSGAAVPCKVEPGLGADNSVVR	11	99
1	trm|Q5HY55|Q5HY55_HUMAN	"Filamin A, alpha (Actin binding protein 280) "	KGEITGEVR	4	99
1	trm|Q5HY55|Q5HY55_HUMAN	"Filamin A, alpha (Actin binding protein 280) "	KIQQNTFTR	1	99
1	trm|Q5HY55|Q5HY55_HUMAN	"Filamin A, alpha (Actin binding protein 280) "	KNGQHVASSPIPVVISQSEIGDASR	5	99
1	trm|Q5HY55|Q5HY55_HUMAN	"Filamin A, alpha (Actin binding protein 280) "	LIALLEVLSQK	3	99
1	trm|Q5HY55|Q5HY55_HUMAN	"Filamin A, alpha (Actin binding protein 280) "	LIALLEVLSQKK	2	99
1	trm|Q5HY55|Q5HY55_HUMAN	"Filamin A, alpha (Actin binding protein 280) "	LLGWIQNK	5	99
1	trm|Q5HY55|Q5HY55_HUMAN	"Filamin A, alpha (Actin binding protein 280) "	LQVEPAVDTSGVQCYGPGIEGQGVFR	12	99
1	trm|Q5HY55|Q5HY55_HUMAN	"Filamin A, alpha (Actin binding protein 280) "	LSPFMADIR	16	99
1	trm|Q5HY55|Q5HY55_HUMAN	"Filamin A, alpha (Actin binding protein 280) "	LYSVSYLLK	7	99
1	trm|Q5HY55|Q5HY55_HUMAN	"Filamin A, alpha (Actin binding protein 280) "	NGHVGISFVPK	8	99
1	trm|Q5HY55|Q5HY55_HUMAN	"Filamin A, alpha (Actin binding protein 280) "	RLTVSSLQESGLK	4	99
1	trm|Q5HY55|Q5HY55_HUMAN	"Filamin A, alpha (Actin binding protein 280) "	SAGQGEVLVYVEDPAGHQEEAK	11	99
1	trm|Q5HY55|Q5HY55_HUMAN	"Filamin A, alpha (Actin binding protein 280) "	SPFEVYVDK	7	99
1	trm|Q5HY55|Q5HY55_HUMAN	"Filamin A, alpha (Actin binding protein 280) "	SPFSVAVSPSLDLSK	18	99
1	trm|Q5HY55|Q5HY55_HUMAN	"Filamin A, alpha (Actin binding protein 280) "	SPYTVTVGQACNPSACR	14	99
1	trm|Q5HY55|Q5HY55_HUMAN	"Filamin A, alpha (Actin binding protein 280) "	SSFTVDCSK	3	99
1	trm|Q5HY55|Q5HY55_HUMAN	"Filamin A, alpha (Actin binding protein 280) "	TFSVWYVPEVTGTHK	9	99
1	trm|Q5HY55|Q5HY55_HUMAN	"Filamin A, alpha (Actin binding protein 280) "	TGVAVNKPAEFTVDAK	11	99
1	trm|Q5HY55|Q5HY55_HUMAN	"Filamin A, alpha (Actin binding protein 280) "	TGVELGKPTHFTVNAK	9	99
1	trm|Q5HY55|Q5HY55_HUMAN	"Filamin A, alpha (Actin binding protein 280) "	TPCEEILVK	7	99
1	trm|Q5HY55|Q5HY55_HUMAN	"Filamin A, alpha (Actin binding protein 280) "	VANPSGNLTETYVQDR	20	99
1	trm|Q5HY55|Q5HY55_HUMAN	"Filamin A, alpha (Actin binding protein 280) "	VAQPTITDNKDGTVTVR	12	99
1	trm|Q5HY55|Q5HY55_HUMAN	"Filamin A, alpha (Actin binding protein 280) "	VDVGKDQEFTVK	5	99
1	trm|Q5HY55|Q5HY55_HUMAN	"Filamin A, alpha (Actin binding protein 280) "	VEPGLGADNSVVR	12	99
1	trm|Q5HY55|Q5HY55_HUMAN	"Filamin A, alpha (Actin binding protein 280) "	VEYTPYEEGLHSVDVTYDGSPVPSSPFQVPVTEGCDPSR	3	99
1	trm|Q5HY55|Q5HY55_HUMAN	"Filamin A, alpha (Actin binding protein 280) "	VGSAADIPINISETDLSLLTATVVPPSGR	10	99
1	trm|Q5HY55|Q5HY55_HUMAN	"Filamin A, alpha (Actin binding protein 280) "	VHGPGIQSGTTNKPNK	12	99
1	trm|Q5HY55|Q5HY55_HUMAN	"Filamin A, alpha (Actin binding protein 280) "	VHSPSGALEECYVTEIDQDK	5	99
1	trm|Q5HY55|Q5HY55_HUMAN	"Filamin A, alpha (Actin binding protein 280) "	VKAEGPGLSR	7	99
1	trm|Q5HY55|Q5HY55_HUMAN	"Filamin A, alpha (Actin binding protein 280) "	VKETADFK	10	99
1	trm|Q5HY55|Q5HY55_HUMAN	"Filamin A, alpha (Actin binding protein 280) "	VKVEPSHDASK	11	99
1	trm|Q5HY55|Q5HY55_HUMAN	"Filamin A, alpha (Actin binding protein 280) "	VLPTHDASK	5	99
1	trm|Q5HY55|Q5HY55_HUMAN	"Filamin A, alpha (Actin binding protein 280) "	VNQPASFAVSLNGAK	17	99
1	trm|Q5HY55|Q5HY55_HUMAN	"Filamin A, alpha (Actin binding protein 280) "	VNVGAGSHPNKVK	7	99
1	trm|Q5HY55|Q5HY55_HUMAN	"Filamin A, alpha (Actin binding protein 280) "	VPVHDVTDASK	6	99
1	trm|Q5HY55|Q5HY55_HUMAN	"Filamin A, alpha (Actin binding protein 280) "	VQVQDNEGCPVEALVK	9	99
1	trm|Q5HY55|Q5HY55_HUMAN	"Filamin A, alpha (Actin binding protein 280) "	VTAQGPGLEPSGNIANK	14	99
1	trm|Q5HY55|Q5HY55_HUMAN	"Filamin A, alpha (Actin binding protein 280) "	VTVLFAGQHIAK	17	99
1	trm|Q5HY55|Q5HY55_HUMAN	"Filamin A, alpha (Actin binding protein 280) "	VTYTPMAPGSYLISIK	10	99
1	trm|Q5HY55|Q5HY55_HUMAN	"Filamin A, alpha (Actin binding protein 280) "	VYGPGVAK	8	99
1	trm|Q5HY55|Q5HY55_HUMAN	"Filamin A, alpha (Actin binding protein 280) "	YAPSEAGLHEMDIR	11	99
1	trm|Q5HY55|Q5HY55_HUMAN	"Filamin A, alpha (Actin binding protein 280) "	YGGDEIPFSPYR	13	99
1	trm|Q5HY55|Q5HY55_HUMAN	"Filamin A, alpha (Actin binding protein 280) "	YGGPYHIGGSPFK	8	99
1	trm|Q5HY55|Q5HY55_HUMAN	"Filamin A, alpha (Actin binding protein 280) "	YNEQHVPGSPFTAR	14	99
1	trm|Q5HY55|Q5HY55_HUMAN	"Filamin A, alpha (Actin binding protein 280) "	YTPVQQGPVGVNVTYGGD	1	99
1	trm|Q5HY55|Q5HY55_HUMAN	"Filamin A, alpha (Actin binding protein 280) "	YTPVQQGPVGVNVTYGGDPIPK	13	99
1	trm|Q5HY55|Q5HY55_HUMAN	"Filamin A, alpha (Actin binding protein 280) "	YWPQEAGEYAVHVLCNSEDIR	3	99
1	trm|Q5HY55|Q5HY55_HUMAN	"Filamin A, alpha (Actin binding protein 280) "	LTVSSLQESGLK	8	98
1	trm|Q5HY55|Q5HY55_HUMAN	"Filamin A, alpha (Actin binding protein 280) "	WGDEHIPGSPYR	6	98
1	trm|Q5HY55|Q5HY55_HUMAN	"Filamin A, alpha (Actin binding protein 280) "	YGGQPVPNFPSK	7	98
1	trm|Q5HY55|Q5HY55_HUMAN	"Filamin A, alpha (Actin binding protein 280) "	LKPGAPLRPK	3	97
1	trm|Q5HY55|Q5HY55_HUMAN	"Filamin A, alpha (Actin binding protein 280) "	LPQLPITNFSR	3	97
1	trm|Q5HY55|Q5HY55_HUMAN	"Filamin A, alpha (Actin binding protein 280) "	LVSIDSK	14	95
1	trm|Q5HY55|Q5HY55_HUMAN	"Filamin A, alpha (Actin binding protein 280) "	SPFEVYVDKSQGDASK	2	95
2	spt|Q9Y490|TLN1_HUMAN	Talin-1	AATAPLLEAVDNLSAFASNPEFSSIPAQISPEGR	3	99
2	spt|Q9Y490|TLN1_HUMAN	Talin-1	ADAEGESDLENSR	5	99
2	spt|Q9Y490|TLN1_HUMAN	Talin-1	ALDGAFTEENR	6	99
2	spt|Q9Y490|TLN1_HUMAN	Talin-1	ALEATTEHIR	4	99
2	spt|Q9Y490|TLN1_HUMAN	Talin-1	AQEACGPLEMDSALSVVQNLEK	6	99
2	spt|Q9Y490|TLN1_HUMAN	Talin-1	ASAGPQPLLVQSCK	9	99
2	spt|Q9Y490|TLN1_HUMAN	Talin-1	AVAEQIPLLVQGVR	11	99
2	spt|Q9Y490|TLN1_HUMAN	Talin-1	AVEDEATKGTR	1	99
2	spt|Q9Y490|TLN1_HUMAN	Talin-1	AVTDSINQLITMCTQQAPGQK	7	99
2	spt|Q9Y490|TLN1_HUMAN	Talin-1	DPPSWSVLAGHSR	5	99
2	spt|Q9Y490|TLN1_HUMAN	Talin-1	EAAYHPEVAPDVR	8	99
2	spt|Q9Y490|TLN1_HUMAN	Talin-1	EADESLNFEEQILEAAK	1	99
2	spt|Q9Y490|TLN1_HUMAN	Talin-1	EQGVEEHETLLLR	4	99
2	spt|Q9Y490|TLN1_HUMAN	Talin-1	FLPSELRDEH	3	99
2	spt|Q9Y490|TLN1_HUMAN	Talin-1	GAAAHPDSEEQQQR	5	99
2	spt|Q9Y490|TLN1_HUMAN	Talin-1	GLAGAVSELLR	6	99
2	spt|Q9Y490|TLN1_HUMAN	Talin-1	GSQAQPDSPSAQLALIAASQSFLQPGGK	10	99
2	spt|Q9Y490|TLN1_HUMAN	Talin-1	GTEWVDPEDPTVIAENELLGAAAAIEAAAK	1	99
2	spt|Q9Y490|TLN1_HUMAN	Talin-1	GVAALTSDPAVQAIVLDTASDVLDK	5	99
2	spt|Q9Y490|TLN1_HUMAN	Talin-1	IGITNHDEYSLVR	2	99
2	spt|Q9Y490|TLN1_HUMAN	Talin-1	ILAQATSDLVNAIK	11	99
2	spt|Q9Y490|TLN1_HUMAN	Talin-1	LAQAAQSSVATITR	9	99
2	spt|Q9Y490|TLN1_HUMAN	Talin-1	LASEAKPAAVAAENEEIGSHIK	3	99
2	spt|Q9Y490|TLN1_HUMAN	Talin-1	LLAALLEDEGGSGRPLLQAAK	4	99
2	spt|Q9Y490|TLN1_HUMAN	Talin-1	LLSDSLPPSTGTFQEAQSR	8	99
2	spt|Q9Y490|TLN1_HUMAN	Talin-1	LNEAAAGLNQAATELVQASR	19	99
2	spt|Q9Y490|TLN1_HUMAN	Talin-1	MVGGIAQIIAAQEEMLR	7	99
2	spt|Q9Y490|TLN1_HUMAN	Talin-1	NLGTALAELR	14	99
2	spt|Q9Y490|TLN1_HUMAN	Talin-1	QAAASATQTIAAAQHAASTPK	17	99
2	spt|Q9Y490|TLN1_HUMAN	Talin-1	QELAVFCSPEPPAK	3	99
2	spt|Q9Y490|TLN1_HUMAN	Talin-1	SNTSPEELGPLANQLTSDYGR	6	99
2	spt|Q9Y490|TLN1_HUMAN	Talin-1	TLAESALQLLYTAK	8	99
2	spt|Q9Y490|TLN1_HUMAN	Talin-1	TLSHPQQMALLDQTK	5	99
2	spt|Q9Y490|TLN1_HUMAN	Talin-1	TMLESAGGLIQTAR	11	99
2	spt|Q9Y490|TLN1_HUMAN	Talin-1	TSTPEDFIR	7	99
2	spt|Q9Y490|TLN1_HUMAN	Talin-1	TVTDMLMTICAR	6	99
2	spt|Q9Y490|TLN1_HUMAN	Talin-1	VAGSVTELIQAAEAMK	5	99
2	spt|Q9Y490|TLN1_HUMAN	Talin-1	VGAIPANALDDGQWSQGLISAAR	14	99
2	spt|Q9Y490|TLN1_HUMAN	Talin-1	VLVQNAAGSQEK	5	99
2	spt|Q9Y490|TLN1_HUMAN	Talin-1	VQELGHGCAALVTK	2	99
2	spt|Q9Y490|TLN1_HUMAN	Talin-1	VSHVLAALQAGNR	4	99
2	spt|Q9Y490|TLN1_HUMAN	Talin-1	VSQMAQYFEPLTLAAVGAASK	6	99
2	spt|Q9Y490|TLN1_HUMAN	Talin-1	VVAPTISSPVCQEQLVEAGR	5	99
2	spt|Q9Y490|TLN1_HUMAN	Talin-1	DLDQASLAAVSQQLAPR	7	98
2	spt|Q9Y490|TLN1_HUMAN	Talin-1	AVAAGNSCR	6	97
3	spt|P02768|ALBU_HUMAN	Serum albumin precursor	AACLLPK	15	99
3	spt|P02768|ALBU_HUMAN	Serum albumin precursor	AAFTECCQAADK	13	99
3	spt|P02768|ALBU_HUMAN	Serum albumin precursor	ADDKETCFAEEGK	9	99
3	spt|P02768|ALBU_HUMAN	Serum albumin precursor	ADDKETCFAEEGKK	11	99
3	spt|P02768|ALBU_HUMAN	Serum albumin precursor	AEFAEVSK	15	99
3	spt|P02768|ALBU_HUMAN	Serum albumin precursor	AEFAEVSKLVTDLTK	9	99
3	spt|P02768|ALBU_HUMAN	Serum albumin precursor	AFKAWAVAR	11	99
3	spt|P02768|ALBU_HUMAN	Serum albumin precursor	AVMDDFAAFVEK	15	99
3	spt|P02768|ALBU_HUMAN	Serum albumin precursor	CCAAADPHECYAK	9	99
3	spt|P02768|ALBU_HUMAN	Serum albumin precursor	CCTESLVNR	10	99
3	spt|P02768|ALBU_HUMAN	Serum albumin precursor	CIAEVENDEMPADLPSLAADFVESK	4	99
3	spt|P02768|ALBU_HUMAN	Serum albumin precursor	CTAFHDNEETFLK	4	99
3	spt|P02768|ALBU_HUMAN	Serum albumin precursor	DAHKSEVAHR	6	99
3	spt|P02768|ALBU_HUMAN	Serum albumin precursor	DDNPNLPR	14	99
3	spt|P02768|ALBU_HUMAN	Serum albumin precursor	DEMPADLPSLAADFVESK	9	99
3	spt|P02768|ALBU_HUMAN	Serum albumin precursor	DLGEENFK	3	99
3	spt|P02768|ALBU_HUMAN	Serum albumin precursor	DVCKNYAEAK	6	99
3	spt|P02768|ALBU_HUMAN	Serum albumin precursor	DVFLGMFLYEYAR	10	99
3	spt|P02768|ALBU_HUMAN	Serum albumin precursor	ECCEKPLLEK	9	99
3	spt|P02768|ALBU_HUMAN	Serum albumin precursor	EFNAETFTFHADICTLSEK	7	99
3	spt|P02768|ALBU_HUMAN	Serum albumin precursor	ETYGEMADCCAK	14	99
3	spt|P02768|ALBU_HUMAN	Serum albumin precursor	FDEFKPLVEEPQNLIK	1	99
3	spt|P02768|ALBU_HUMAN	Serum albumin precursor	FKDLGEENFK	9	99
3	spt|P02768|ALBU_HUMAN	Serum albumin precursor	FPKAEFAEVSK	5	99
3	spt|P02768|ALBU_HUMAN	Serum albumin precursor	FQNALLVR	15	99
3	spt|P02768|ALBU_HUMAN	Serum albumin precursor	FSALEVDETYVPK	1	99
3	spt|P02768|ALBU_HUMAN	Serum albumin precursor	FYAPELLFFAK	6	99
3	spt|P02768|ALBU_HUMAN	Serum albumin precursor	HADICTLSEK	2	99
3	spt|P02768|ALBU_HUMAN	Serum albumin precursor	HPDYSVVLLLR	3	99
3	spt|P02768|ALBU_HUMAN	Serum albumin precursor	HPYFYAPELLFFAK	4	99
3	spt|P02768|ALBU_HUMAN	Serum albumin precursor	KLVAASQAALG	4	99
3	spt|P02768|ALBU_HUMAN	Serum albumin precursor	KLVAASQAALGL	14	99
3	spt|P02768|ALBU_HUMAN	Serum albumin precursor	KQTALVELVK	14	99
3	spt|P02768|ALBU_HUMAN	Serum albumin precursor	KVPQVSTPTLVEVSR	14	99
3	spt|P02768|ALBU_HUMAN	Serum albumin precursor	KYLYEIAR	11	99
3	spt|P02768|ALBU_HUMAN	Serum albumin precursor	LAKTYETTLEK	3	99
3	spt|P02768|ALBU_HUMAN	Serum albumin precursor	LCTVATLR	12	99
3	spt|P02768|ALBU_HUMAN	Serum albumin precursor	LDELRDEGK	14	99
3	spt|P02768|ALBU_HUMAN	Serum albumin precursor	LDELRDEGKASSAK	6	99
3	spt|P02768|ALBU_HUMAN	Serum albumin precursor	LKCASLQK	5	99
3	spt|P02768|ALBU_HUMAN	Serum albumin precursor	LKECCEKPLLEK	6	99
3	spt|P02768|ALBU_HUMAN	Serum albumin precursor	LVAASQAAL	15	99
3	spt|P02768|ALBU_HUMAN	Serum albumin precursor	LVAASQAALG	15	99
3	spt|P02768|ALBU_HUMAN	Serum albumin precursor	LVAASQAALGL	15	99
3	spt|P02768|ALBU_HUMAN	Serum albumin precursor	LVNEVTEFAK	15	99
3	spt|P02768|ALBU_HUMAN	Serum albumin precursor	LVRPEVDVM	7	99
3	spt|P02768|ALBU_HUMAN	Serum albumin precursor	LVRPEVDVMCTAFHDNEETFLK	6	99
3	spt|P02768|ALBU_HUMAN	Serum albumin precursor	LVRPEVDVMCTAFHDNEETFLKK	4	99
3	spt|P02768|ALBU_HUMAN	Serum albumin precursor	NECFLQHK	9	99
3	spt|P02768|ALBU_HUMAN	Serum albumin precursor	NECFLQHKDDNPNLPR	9	99
3	spt|P02768|ALBU_HUMAN	Serum albumin precursor	NLGKVGSK	4	99
3	spt|P02768|ALBU_HUMAN	Serum albumin precursor	QEPERNECFLQHK	9	99
3	spt|P02768|ALBU_HUMAN	Serum albumin precursor	QEPERNECFLQHKDDN	2	99
3	spt|P02768|ALBU_HUMAN	Serum albumin precursor	QEPERNECFLQHKDDNP	2	99
3	spt|P02768|ALBU_HUMAN	Serum albumin precursor	QEPERNECFLQHKDDNPNLPR	14	99
3	spt|P02768|ALBU_HUMAN	Serum albumin precursor	QNCELFEQLGEYK	12	99
3	spt|P02768|ALBU_HUMAN	Serum albumin precursor	QTALVELVK	15	99
3	spt|P02768|ALBU_HUMAN	Serum albumin precursor	QVSTPTLVEVSR	4	99
3	spt|P02768|ALBU_HUMAN	Serum albumin precursor	RHPDYSVVLLLR	6	99
3	spt|P02768|ALBU_HUMAN	Serum albumin precursor	RHPYFYAPELLFFAK	4	99
3	spt|P02768|ALBU_HUMAN	Serum albumin precursor	RPCFSALEVDETYVPK	13	99
3	spt|P02768|ALBU_HUMAN	Serum albumin precursor	SHCIAEVENDEMPADLPSLAADFVESK	8	99
3	spt|P02768|ALBU_HUMAN	Serum albumin precursor	SHCIAEVENDEMPADLPSLAADFVESKDVCK	3	99
3	spt|P02768|ALBU_HUMAN	Serum albumin precursor	SLHTLFGDK	9	99
3	spt|P02768|ALBU_HUMAN	Serum albumin precursor	SLHTLFGDKLCTVATLR	4	99
3	spt|P02768|ALBU_HUMAN	Serum albumin precursor	TCVADESAENCDK	11	99
3	spt|P02768|ALBU_HUMAN	Serum albumin precursor	TECCHGDLLECADDR	7	99
3	spt|P02768|ALBU_HUMAN	Serum albumin precursor	TECCHGDLLECADDRADLAK	3	99
3	spt|P02768|ALBU_HUMAN	Serum albumin precursor	TFHADICTLSEK	5	99
3	spt|P02768|ALBU_HUMAN	Serum albumin precursor	TPVSDRVTK	7	99
3	spt|P02768|ALBU_HUMAN	Serum albumin precursor	TYETTLEK	15	99
3	spt|P02768|ALBU_HUMAN	Serum albumin precursor	VFDEFKPLVEE	3	99
3	spt|P02768|ALBU_HUMAN	Serum albumin precursor	VFDEFKPLVEEPQN	4	99
3	spt|P02768|ALBU_HUMAN	Serum albumin precursor	VFDEFKPLVEEPQNLIK	13	99
3	spt|P02768|ALBU_HUMAN	Serum albumin precursor	VHTECCHGDLLECADDR	8	99
3	spt|P02768|ALBU_HUMAN	Serum albumin precursor	VHTECCHGDLLECADDRADLAK	7	99
3	spt|P02768|ALBU_HUMAN	Serum albumin precursor	VPQVSTPTLVEVSR	13	99
3	spt|P02768|ALBU_HUMAN	Serum albumin precursor	YICENQDSISSK	15	99
3	spt|P02768|ALBU_HUMAN	Serum albumin precursor	YLYEIAR	15	99
3	spt|P02768|ALBU_HUMAN	Serum albumin precursor	AVMDDFAAFVE	5	98
3	spt|P02768|ALBU_HUMAN	Serum albumin precursor	RETYGEMADCCAK	6	98
3	spt|P02768|ALBU_HUMAN	Serum albumin precursor	TCVADESAEN	7	98
3	spt|P02768|ALBU_HUMAN	Serum albumin precursor	AKYICENQDSISSK	2	97
3	spt|P02768|ALBU_HUMAN	Serum albumin precursor	CELFEQLGEYK	3	97
3	spt|P02768|ALBU_HUMAN	Serum albumin precursor	DVFLGMFLY	4	97
3	spt|P02768|ALBU_HUMAN	Serum albumin precursor	QIKKQTALVELVK	5	97
3	spt|P02768|ALBU_HUMAN	Serum albumin precursor	VMDDFAAFVEK	2	97
3	spt|P02768|ALBU_HUMAN	Serum albumin precursor	YICENQDSIS	3	97
3	spt|P02768|ALBU_HUMAN	Serum albumin precursor	ATKEQLK	11	96
3	spt|P02768|ALBU_HUMAN	Serum albumin precursor	LSQRFPK	11	96
3	spt|P02768|ALBU_HUMAN	Serum albumin precursor	LVTDLTK	15	96
3	spt|P02768|ALBU_HUMAN	Serum albumin precursor	VAASQAALGL	1	96
3	spt|P02768|ALBU_HUMAN	Serum albumin precursor	PSLAADFVESK	3	95
3	spt|P02768|ALBU_HUMAN	Serum albumin precursor	SLHTLFGD	1	95
4	spt|P18206|VINC_HUMAN	Vinculin (Metavinculin)	AAAVGTANK	10	99
4	spt|P18206|VINC_HUMAN	Vinculin (Metavinculin)	AASDELSK	10	99
4	spt|P18206|VINC_HUMAN	Vinculin (Metavinculin)	AGEVINQPMMMAAR	15	99
4	spt|P18206|VINC_HUMAN	Vinculin (Metavinculin)	AIPDLTAPVAAVQAAVSNLVR	12	99
4	spt|P18206|VINC_HUMAN	Vinculin (Metavinculin)	ALASIDSK	7	99
4	spt|P18206|VINC_HUMAN	Vinculin (Metavinculin)	ALASQLQDSLK	11	99
4	spt|P18206|VINC_HUMAN	Vinculin (Metavinculin)	AQQVSQGLDVLTAK	13	99
4	spt|P18206|VINC_HUMAN	Vinculin (Metavinculin)	AVAGNISDPGLQK	12	99
4	spt|P18206|VINC_HUMAN	Vinculin (Metavinculin)	AVANSRPAK	11	99
4	spt|P18206|VINC_HUMAN	Vinculin (Metavinculin)	CDRVDQLTAQLADLAAR	7	99
4	spt|P18206|VINC_HUMAN	Vinculin (Metavinculin)	DPSASPGDAGEQAIR	12	99
4	spt|P18206|VINC_HUMAN	Vinculin (Metavinculin)	DYLIDGSR	6	99
4	spt|P18206|VINC_HUMAN	Vinculin (Metavinculin)	EAEAASIK	4	99
4	spt|P18206|VINC_HUMAN	Vinculin (Metavinculin)	EAFQPQEPDFPPPPPDLEQLR	15	99
4	spt|P18206|VINC_HUMAN	Vinculin (Metavinculin)	ELTPQVVSAAR	16	99
4	spt|P18206|VINC_HUMAN	Vinculin (Metavinculin)	ETVQTTEDQILK	7	99
4	spt|P18206|VINC_HUMAN	Vinculin (Metavinculin)	EVENSEDPKFR	5	99
4	spt|P18206|VINC_HUMAN	Vinculin (Metavinculin)	GEGESPQAR	5	99
4	spt|P18206|VINC_HUMAN	Vinculin (Metavinculin)	GLVAEGHR	4	99
4	spt|P18206|VINC_HUMAN	Vinculin (Metavinculin)	GVGQAAIR	8	99
4	spt|P18206|VINC_HUMAN	Vinculin (Metavinculin)	GWLRDPSASPGDAGEQAIR	11	99
4	spt|P18206|VINC_HUMAN	Vinculin (Metavinculin)	KIDAAQNWLADPNGGPEGEEQIR	3	99
4	spt|P18206|VINC_HUMAN	Vinculin (Metavinculin)	KLEAMTNSK	4	99
4	spt|P18206|VINC_HUMAN	Vinculin (Metavinculin)	LANVMMGPYR	8	99
4	spt|P18206|VINC_HUMAN	Vinculin (Metavinculin)	LLAVAATAPPDAPNREEVFDER	7	99
4	spt|P18206|VINC_HUMAN	Vinculin (Metavinculin)	LTDELAPPKPPLPEGEVPPPRPPPPEEKDEEFPEQK	2	99
4	spt|P18206|VINC_HUMAN	Vinculin (Metavinculin)	LVQAAQMLQSDPYSVPAR	14	99
4	spt|P18206|VINC_HUMAN	Vinculin (Metavinculin)	MALLMAEMSR	7	99
4	spt|P18206|VINC_HUMAN	Vinculin (Metavinculin)	MLGQMTDQVADLR	15	99
4	spt|P18206|VINC_HUMAN	Vinculin (Metavinculin)	MQEAMTQEVSDVFSDTTTPIK	6	99
4	spt|P18206|VINC_HUMAN	Vinculin (Metavinculin)	MSAEINEIIR	5	99
4	spt|P18206|VINC_HUMAN	Vinculin (Metavinculin)	MTGLVDEAIDTK	4	99
4	spt|P18206|VINC_HUMAN	Vinculin (Metavinculin)	NPGNQAAYEHFETMK	3	99
4	spt|P18206|VINC_HUMAN	Vinculin (Metavinculin)	NQGIEEALK	5	99
4	spt|P18206|VINC_HUMAN	Vinculin (Metavinculin)	NQWIDNVEK	4	99
4	spt|P18206|VINC_HUMAN	Vinculin (Metavinculin)	QQELTHQEHR	6	99
4	spt|P18206|VINC_HUMAN	Vinculin (Metavinculin)	QVATALQNLQTK	19	99
4	spt|P18206|VINC_HUMAN	Vinculin (Metavinculin)	SFLDSGYR	8	99
4	spt|P18206|VINC_HUMAN	Vinculin (Metavinculin)	SLGEISALTSK	4	99
4	spt|P18206|VINC_HUMAN	Vinculin (Metavinculin)	SLLDASEEAIKK	2	99
4	spt|P18206|VINC_HUMAN	Vinculin (Metavinculin)	STVEGIQASVK	8	99
4	spt|P18206|VINC_HUMAN	Vinculin (Metavinculin)	TDAGFTLR	16	99
4	spt|P18206|VINC_HUMAN	Vinculin (Metavinculin)	TNLLQVCER	7	99
4	spt|P18206|VINC_HUMAN	Vinculin (Metavinculin)	VAMANIQPQMLVAGATSIAR	19	99
4	spt|P18206|VINC_HUMAN	Vinculin (Metavinculin)	VDQLTAQLADLAAR	13	99
4	spt|P18206|VINC_HUMAN	Vinculin (Metavinculin)	VGELCAGK	1	99
4	spt|P18206|VINC_HUMAN	Vinculin (Metavinculin)	VLQLTSWDEDAWASK	4	99
4	spt|P18206|VINC_HUMAN	Vinculin (Metavinculin)	WIDNPTVDDR	7	99
4	spt|P18206|VINC_HUMAN	Vinculin (Metavinculin)	WIDNPTVDDRGVGQAAIR	6	99
4	spt|P18206|VINC_HUMAN	Vinculin (Metavinculin)	AANFENHSGKLGATAEK	13	98
4	spt|P18206|VINC_HUMAN	Vinculin (Metavinculin)	QMTDQVADLRAR	7	98
4	spt|P18206|VINC_HUMAN	Vinculin (Metavinculin)	VGKETVQTTEDQILKR	7	98
4	spt|P18206|VINC_HUMAN	Vinculin (Metavinculin)	TISPMVMDAK	5	97
4	spt|P18206|VINC_HUMAN	Vinculin (Metavinculin)	TNISDEESEQATEMLVHNAQNLMQSVK	7	97
4	spt|P18206|VINC_HUMAN	Vinculin (Metavinculin)	ARGQGSSPVAMQK	12	96
4	spt|P18206|VINC_HUMAN	Vinculin (Metavinculin)	MLVAGATSIAR	1	95
4	spt|P18206|VINC_HUMAN	Vinculin (Metavinculin)	NQPMMMAAR	2	95
5	trm|Q53G76|Q53G76_HUMAN	Beta actin variant (Fragment)	AGFAGDDAPR	18	99
5	trm|Q53G76|Q53G76_HUMAN	Beta actin variant (Fragment)	ALDFEQEMATAASSSSLEK	1	99
5	trm|Q53G76|Q53G76_HUMAN	Beta actin variant (Fragment)	AVFPSIVGR	18	99
5	trm|Q53G76|Q53G76_HUMAN	Beta actin variant (Fragment)	AVFPSIVGRP	4	99
5	trm|Q53G76|Q53G76_HUMAN	Beta actin variant (Fragment)	AVFPSIVGRPR	17	99
5	trm|Q53G76|Q53G76_HUMAN	Beta actin variant (Fragment)	CPEALFQPSFLGMESCGIHETTFNSIMK	3	99
5	trm|Q53G76|Q53G76_HUMAN	Beta actin variant (Fragment)	DDDIAALVVDNGSGMCK	18	99
5	trm|Q53G76|Q53G76_HUMAN	Beta actin variant (Fragment)	DDDIAALVVDNGSGMCKAGF	4	99
5	trm|Q53G76|Q53G76_HUMAN	Beta actin variant (Fragment)	DDIAALVVDNGSGMCK	12	99
5	trm|Q53G76|Q53G76_HUMAN	Beta actin variant (Fragment)	DLTDYLMK	13	99
5	trm|Q53G76|Q53G76_HUMAN	Beta actin variant (Fragment)	DLYANTVLSGGTTMYPGIADR	18	99
5	trm|Q53G76|Q53G76_HUMAN	Beta actin variant (Fragment)	DSYVGDEAQS	1	99
5	trm|Q53G76|Q53G76_HUMAN	Beta actin variant (Fragment)	DSYVGDEAQSK	15	99
5	trm|Q53G76|Q53G76_HUMAN	Beta actin variant (Fragment)	DSYVGDEAQSKR	12	99
5	trm|Q53G76|Q53G76_HUMAN	Beta actin variant (Fragment)	EITALAPSTMK	18	99
5	trm|Q53G76|Q53G76_HUMAN	Beta actin variant (Fragment)	GFAGDDAPR	1	99
5	trm|Q53G76|Q53G76_HUMAN	Beta actin variant (Fragment)	GYSFTTTAER	14	99
5	trm|Q53G76|Q53G76_HUMAN	Beta actin variant (Fragment)	HQGVMVGMGQK	11	99
5	trm|Q53G76|Q53G76_HUMAN	Beta actin variant (Fragment)	IIAPPERK	13	99
5	trm|Q53G76|Q53G76_HUMAN	Beta actin variant (Fragment)	IKIIAPPER	10	99
5	trm|Q53G76|Q53G76_HUMAN	Beta actin variant (Fragment)	IKIIAPPERK	4	99
5	trm|Q53G76|Q53G76_HUMAN	Beta actin variant (Fragment)	IWHHTFYNELR	6	99
5	trm|Q53G76|Q53G76_HUMAN	Beta actin variant (Fragment)	KDLYANTVLSGGTTMYPGIADR	15	99
5	trm|Q53G76|Q53G76_HUMAN	Beta actin variant (Fragment)	LCYVALDFEQEMATAASSSSLEK	4	99
5	trm|Q53G76|Q53G76_HUMAN	Beta actin variant (Fragment)	LDLAGRDLTDYLMK	9	99
5	trm|Q53G76|Q53G76_HUMAN	Beta actin variant (Fragment)	LLTEAPLNPK	3	99
5	trm|Q53G76|Q53G76_HUMAN	Beta actin variant (Fragment)	MQKEITALAPSTMK	13	99
5	trm|Q53G76|Q53G76_HUMAN	Beta actin variant (Fragment)	PDGQVITIGNER	6	99
5	trm|Q53G76|Q53G76_HUMAN	Beta actin variant (Fragment)	QEYDESGPSIVHR	13	99
5	trm|Q53G76|Q53G76_HUMAN	Beta actin variant (Fragment)	SGGTTMYPGIADR	5	99
5	trm|Q53G76|Q53G76_HUMAN	Beta actin variant (Fragment)	SYELPDGQVITI	10	99
5	trm|Q53G76|Q53G76_HUMAN	Beta actin variant (Fragment)	SYELPDGQVITIGNER	18	99
5	trm|Q53G76|Q53G76_HUMAN	Beta actin variant (Fragment)	TEAPLNPK	8	99
5	trm|Q53G76|Q53G76_HUMAN	Beta actin variant (Fragment)	TTGIVMDSGDGVTHTVPIYEGY	3	99
5	trm|Q53G76|Q53G76_HUMAN	Beta actin variant (Fragment)	TTGIVMDSGDGVTHTVPIYEGYALPH	7	99
5	trm|Q53G76|Q53G76_HUMAN	Beta actin variant (Fragment)	TTGIVMDSGDGVTHTVPIYEGYALPHAILR	11	99
5	trm|Q53G76|Q53G76_HUMAN	Beta actin variant (Fragment)	TVLSGGTTMYPGIADR	6	99
5	trm|Q53G76|Q53G76_HUMAN	Beta actin variant (Fragment)	VAPEEHPVLL	11	99
5	trm|Q53G76|Q53G76_HUMAN	Beta actin variant (Fragment)	VAPEEHPVLLTEA	9	99
5	trm|Q53G76|Q53G76_HUMAN	Beta actin variant (Fragment)	VAPEEHPVLLTEAPLN	12	99
5	trm|Q53G76|Q53G76_HUMAN	Beta actin variant (Fragment)	VAPEEHPVLLTEAPLNPK	17	99
5	trm|Q53G76|Q53G76_HUMAN	Beta actin variant (Fragment)	VLSGGTTMYPGIADR	4	99
5	trm|Q53G76|Q53G76_HUMAN	Beta actin variant (Fragment)	YPIEHGIVTNWDDMEK	10	99
5	trm|Q53G76|Q53G76_HUMAN	Beta actin variant (Fragment)	VAPEEHPVL	7	98
5	trm|Q53G76|Q53G76_HUMAN	Beta actin variant (Fragment)	VAPEEHPVLLT	1	98
5	trm|Q53G76|Q53G76_HUMAN	Beta actin variant (Fragment)	AALVVDNGSGMCK	2	97
5	trm|Q53G76|Q53G76_HUMAN	Beta actin variant (Fragment)	GIHETTFNSIMK	2	96
5	trm|Q53G76|Q53G76_HUMAN	Beta actin variant (Fragment)	HQGVMVGMGQKDSYVGDEAQSK	3	96
5	trm|Q53G76|Q53G76_HUMAN	Beta actin variant (Fragment)	RGILTLK	7	96
5	trm|Q53G76|Q53G76_HUMAN	Beta actin variant (Fragment)	SYELPDGQVI	5	95
5	trm|Q53G76|Q53G76_HUMAN	Beta actin variant (Fragment)	VAPEEHP	1	95
6	trm|Q548L2|Q548L2_HUMAN	CTCL tumor antigen HD-CL-06 (Vimentin variant)	ASSPGGVYATR	3	99
6	trm|Q548L2|Q548L2_HUMAN	CTCL tumor antigen HD-CL-06 (Vimentin variant)	DGQVINETSQHHDDLE	17	99
6	trm|Q548L2|Q548L2_HUMAN	CTCL tumor antigen HD-CL-06 (Vimentin variant)	DNLAEDIMR	11	99
6	trm|Q548L2|Q548L2_HUMAN	CTCL tumor antigen HD-CL-06 (Vimentin variant)	DVRQQYESVAAK	6	99
6	trm|Q548L2|Q548L2_HUMAN	CTCL tumor antigen HD-CL-06 (Vimentin variant)	EEAENTLQSFR	11	99
6	trm|Q548L2|Q548L2_HUMAN	CTCL tumor antigen HD-CL-06 (Vimentin variant)	EMEENFAVEAANYQDTIGR	13	99
6	trm|Q548L2|Q548L2_HUMAN	CTCL tumor antigen HD-CL-06 (Vimentin variant)	ETNLDSLPLVDTHSK	11	99
6	trm|Q548L2|Q548L2_HUMAN	CTCL tumor antigen HD-CL-06 (Vimentin variant)	EYQDLLNVK	12	99
6	trm|Q548L2|Q548L2_HUMAN	CTCL tumor antigen HD-CL-06 (Vimentin variant)	FADLSEAANR	20	99
6	trm|Q548L2|Q548L2_HUMAN	CTCL tumor antigen HD-CL-06 (Vimentin variant)	FADLSEAANRNNDALR	13	99
6	trm|Q548L2|Q548L2_HUMAN	CTCL tumor antigen HD-CL-06 (Vimentin variant)	ILLAELEQLK	8	99
6	trm|Q548L2|Q548L2_HUMAN	CTCL tumor antigen HD-CL-06 (Vimentin variant)	ILLAELEQLKGQGK	8	99
6	trm|Q548L2|Q548L2_HUMAN	CTCL tumor antigen HD-CL-06 (Vimentin variant)	ISLPLPNFSSLNLR	16	99
6	trm|Q548L2|Q548L2_HUMAN	CTCL tumor antigen HD-CL-06 (Vimentin variant)	KLLEGEESR	6	99
6	trm|Q548L2|Q548L2_HUMAN	CTCL tumor antigen HD-CL-06 (Vimentin variant)	KVESLQEEIAFLK	11	99
6	trm|Q548L2|Q548L2_HUMAN	CTCL tumor antigen HD-CL-06 (Vimentin variant)	LGDLYEEEMR	16	99
6	trm|Q548L2|Q548L2_HUMAN	CTCL tumor antigen HD-CL-06 (Vimentin variant)	LLEGEESR	8	99
6	trm|Q548L2|Q548L2_HUMAN	CTCL tumor antigen HD-CL-06 (Vimentin variant)	LLQDSVDFSLADAINTEFK	10	99
6	trm|Q548L2|Q548L2_HUMAN	CTCL tumor antigen HD-CL-06 (Vimentin variant)	LQDEIQNMKEEMAR	9	99
6	trm|Q548L2|Q548L2_HUMAN	CTCL tumor antigen HD-CL-06 (Vimentin variant)	LQEEMLQREEAENTLQSFR	6	99
6	trm|Q548L2|Q548L2_HUMAN	CTCL tumor antigen HD-CL-06 (Vimentin variant)	NLDSLPLVDTHSK	2	99
6	trm|Q548L2|Q548L2_HUMAN	CTCL tumor antigen HD-CL-06 (Vimentin variant)	NLQEAEEWYK	11	99
6	trm|Q548L2|Q548L2_HUMAN	CTCL tumor antigen HD-CL-06 (Vimentin variant)	QDVDNASLAR	20	99
6	trm|Q548L2|Q548L2_HUMAN	CTCL tumor antigen HD-CL-06 (Vimentin variant)	QQYESVAAK	20	99
6	trm|Q548L2|Q548L2_HUMAN	CTCL tumor antigen HD-CL-06 (Vimentin variant)	QVDQLTNDKAR	7	99
6	trm|Q548L2|Q548L2_HUMAN	CTCL tumor antigen HD-CL-06 (Vimentin variant)	QVQSLTCEVDALK	15	99
6	trm|Q548L2|Q548L2_HUMAN	CTCL tumor antigen HD-CL-06 (Vimentin variant)	QVQSLTCEVDALKGTNESLER	6	99
6	trm|Q548L2|Q548L2_HUMAN	CTCL tumor antigen HD-CL-06 (Vimentin variant)	SLPLVDTHSK	1	99
6	trm|Q548L2|Q548L2_HUMAN	CTCL tumor antigen HD-CL-06 (Vimentin variant)	SLYASSPGGVYATR	14	99
6	trm|Q548L2|Q548L2_HUMAN	CTCL tumor antigen HD-CL-06 (Vimentin variant)	SVSSSSYR	4	99
6	trm|Q548L2|Q548L2_HUMAN	CTCL tumor antigen HD-CL-06 (Vimentin variant)	SYVTTSTR	4	99
6	trm|Q548L2|Q548L2_HUMAN	CTCL tumor antigen HD-CL-06 (Vimentin variant)	TNEKVELQELNDR	9	99
6	trm|Q548L2|Q548L2_HUMAN	CTCL tumor antigen HD-CL-06 (Vimentin variant)	TYSLGSALRPSTSR	15	99
6	trm|Q548L2|Q548L2_HUMAN	CTCL tumor antigen HD-CL-06 (Vimentin variant)	VELQELNDR	10	99
6	trm|Q548L2|Q548L2_HUMAN	CTCL tumor antigen HD-CL-06 (Vimentin variant)	VEVERDNLAEDIMR	11	99
6	trm|Q548L2|Q548L2_HUMAN	CTCL tumor antigen HD-CL-06 (Vimentin variant)	LQEEMLQR	15	98
6	trm|Q548L2|Q548L2_HUMAN	CTCL tumor antigen HD-CL-06 (Vimentin variant)	QVDQLTNDK	14	98
6	trm|Q548L2|Q548L2_HUMAN	CTCL tumor antigen HD-CL-06 (Vimentin variant)	GTNESLER	2	95
7	trm|Q59EJ3|Q59EJ3_HUMAN	Heat shock 70kDa protein 1A variant (Fragment)	AFYPEEISSMVLTK	6	99
7	trm|Q59EJ3|Q59EJ3_HUMAN	Heat shock 70kDa protein 1A variant (Fragment)	AQIHDLVLVGGSTR	11	99
7	trm|Q59EJ3|Q59EJ3_HUMAN	Heat shock 70kDa protein 1A variant (Fragment)	ATAGDTHLGGEDFDNR	16	99
7	trm|Q59EJ3|Q59EJ3_HUMAN	Heat shock 70kDa protein 1A variant (Fragment)	DAGVIAGLNVLR	19	99
7	trm|Q59EJ3|Q59EJ3_HUMAN	Heat shock 70kDa protein 1A variant (Fragment)	ELEQVCNPIISGLYQGAGGPGPGGFGAQGPK	14	99
7	trm|Q59EJ3|Q59EJ3_HUMAN	Heat shock 70kDa protein 1A variant (Fragment)	FEELCSDLFR	9	99
7	trm|Q59EJ3|Q59EJ3_HUMAN	Heat shock 70kDa protein 1A variant (Fragment)	FELSGIPPAPR	6	99
7	trm|Q59EJ3|Q59EJ3_HUMAN	Heat shock 70kDa protein 1A variant (Fragment)	FGDPVVQSDMK	4	99
7	trm|Q59EJ3|Q59EJ3_HUMAN	Heat shock 70kDa protein 1A variant (Fragment)	GGSGSGPTIEEVD	18	99
7	trm|Q59EJ3|Q59EJ3_HUMAN	Heat shock 70kDa protein 1A variant (Fragment)	IINEPTAAAIAYGLDR	18	99
7	trm|Q59EJ3|Q59EJ3_HUMAN	Heat shock 70kDa protein 1A variant (Fragment)	ITITNDKGR	4	99
7	trm|Q59EJ3|Q59EJ3_HUMAN	Heat shock 70kDa protein 1A variant (Fragment)	LLQDFFNGR	8	99
7	trm|Q59EJ3|Q59EJ3_HUMAN	Heat shock 70kDa protein 1A variant (Fragment)	LLQDFFNGRDLNK	7	99
7	trm|Q59EJ3|Q59EJ3_HUMAN	Heat shock 70kDa protein 1A variant (Fragment)	LSKEEIER	4	99
7	trm|Q59EJ3|Q59EJ3_HUMAN	Heat shock 70kDa protein 1A variant (Fragment)	LVNHFVEEFK	5	99
7	trm|Q59EJ3|Q59EJ3_HUMAN	Heat shock 70kDa protein 1A variant (Fragment)	NALESYAFNMK	12	99
7	trm|Q59EJ3|Q59EJ3_HUMAN	Heat shock 70kDa protein 1A variant (Fragment)	NAVITVPAYFNDSQR	6	99
7	trm|Q59EJ3|Q59EJ3_HUMAN	Heat shock 70kDa protein 1A variant (Fragment)	NQVALNPQNTVFDAK	18	99
7	trm|Q59EJ3|Q59EJ3_HUMAN	Heat shock 70kDa protein 1A variant (Fragment)	NQVALNPQNTVFDAKR	13	99
7	trm|Q59EJ3|Q59EJ3_HUMAN	Heat shock 70kDa protein 1A variant (Fragment)	PFQVINDGDKPK	1	99
7	trm|Q59EJ3|Q59EJ3_HUMAN	Heat shock 70kDa protein 1A variant (Fragment)	QATKDAGVIAGLNVLR	9	99
7	trm|Q59EJ3|Q59EJ3_HUMAN	Heat shock 70kDa protein 1A variant (Fragment)	RIINEPTAAAIAYGLDR	1	99
7	trm|Q59EJ3|Q59EJ3_HUMAN	Heat shock 70kDa protein 1A variant (Fragment)	SAVEDEGLK	5	99
7	trm|Q59EJ3|Q59EJ3_HUMAN	Heat shock 70kDa protein 1A variant (Fragment)	SCVGVFQHGK	3	99
7	trm|Q59EJ3|Q59EJ3_HUMAN	Heat shock 70kDa protein 1A variant (Fragment)	SINPDEAVAYGAAVQAAILMGDK	5	99
7	trm|Q59EJ3|Q59EJ3_HUMAN	Heat shock 70kDa protein 1A variant (Fragment)	STLEPVEK	5	99
7	trm|Q59EJ3|Q59EJ3_HUMAN	Heat shock 70kDa protein 1A variant (Fragment)	TTPSYVAFTDTER	18	99
7	trm|Q59EJ3|Q59EJ3_HUMAN	Heat shock 70kDa protein 1A variant (Fragment)	VEIIANDQGNR	15	99
7	trm|Q59EJ3|Q59EJ3_HUMAN	Heat shock 70kDa protein 1A variant (Fragment)	VQVSYKGETK	6	99
7	trm|Q59EJ3|Q59EJ3_HUMAN	Heat shock 70kDa protein 1A variant (Fragment)	YKAEDEVQR	4	99
7	trm|Q59EJ3|Q59EJ3_HUMAN	Heat shock 70kDa protein 1A variant (Fragment)	LIGDAAK	14	98
7	trm|Q59EJ3|Q59EJ3_HUMAN	Heat shock 70kDa protein 1A variant (Fragment)	GGSGSGPTIEEV	10	96
7	trm|Q59EJ3|Q59EJ3_HUMAN	Heat shock 70kDa protein 1A variant (Fragment)	HWPFQVINDGDKPK	7	96
8	trm|Q53H26|Q53H26_HUMAN	Transferrin variant (Fragment)	ADRDQYELLCLDNTR	10	99
8	trm|Q53H26|Q53H26_HUMAN	Transferrin variant (Fragment)	APNHAVVTR	15	99
8	trm|Q53H26|Q53H26_HUMAN	Transferrin variant (Fragment)	APNHAVVTRK	6	99
8	trm|Q53H26|Q53H26_HUMAN	Transferrin variant (Fragment)	ASYLDCIR	10	99
8	trm|Q53H26|Q53H26_HUMAN	Transferrin variant (Fragment)	CDEWSVNSVGK	3	99
8	trm|Q53H26|Q53H26_HUMAN	Transferrin variant (Fragment)	CLKDGAGDVAFVK	9	99
8	trm|Q53H26|Q53H26_HUMAN	Transferrin variant (Fragment)	CSTSSLLEACTFR	11	99
8	trm|Q53H26|Q53H26_HUMAN	Transferrin variant (Fragment)	DCHLAQVPSHTVVAR	5	99
8	trm|Q53H26|Q53H26_HUMAN	Transferrin variant (Fragment)	DDTVCLAK	7	99
8	trm|Q53H26|Q53H26_HUMAN	Transferrin variant (Fragment)	DGAGDVAFVK	11	99
8	trm|Q53H26|Q53H26_HUMAN	Transferrin variant (Fragment)	DLLFRDDTVCLAK	6	99
8	trm|Q53H26|Q53H26_HUMAN	Transferrin variant (Fragment)	DQYELLCLDNTR	7	99
8	trm|Q53H26|Q53H26_HUMAN	Transferrin variant (Fragment)	DSGFQMNQLR	13	99
8	trm|Q53H26|Q53H26_HUMAN	Transferrin variant (Fragment)	DYELLCLDGTR	4	99
8	trm|Q53H26|Q53H26_HUMAN	Transferrin variant (Fragment)	EDPQTFYYAVAVVK	8	99
8	trm|Q53H26|Q53H26_HUMAN	Transferrin variant (Fragment)	EFQLFSSPHGK	7	99
8	trm|Q53H26|Q53H26_HUMAN	Transferrin variant (Fragment)	EGTCPEAPTDECKPVK	9	99
8	trm|Q53H26|Q53H26_HUMAN	Transferrin variant (Fragment)	EGYYGYTGAFR	12	99
8	trm|Q53H26|Q53H26_HUMAN	Transferrin variant (Fragment)	FDEFFSEGCAPGSK	11	99
8	trm|Q53H26|Q53H26_HUMAN	Transferrin variant (Fragment)	IECVSAETTEDCIAK	11	99
8	trm|Q53H26|Q53H26_HUMAN	Transferrin variant (Fragment)	IMNGEADAMSLDGGFVYIAGK	9	99
8	trm|Q53H26|Q53H26_HUMAN	Transferrin variant (Fragment)	KASYLDCIR	11	99
8	trm|Q53H26|Q53H26_HUMAN	Transferrin variant (Fragment)	KDSGFQMNQLR	15	99
8	trm|Q53H26|Q53H26_HUMAN	Transferrin variant (Fragment)	KPVDEYKDCHLAQVPSHTVVAR	3	99
8	trm|Q53H26|Q53H26_HUMAN	Transferrin variant (Fragment)	KPVEEYANCHLAR	8	99
8	trm|Q53H26|Q53H26_HUMAN	Transferrin variant (Fragment)	LCMGSGLNLCEPNNK	7	99
8	trm|Q53H26|Q53H26_HUMAN	Transferrin variant (Fragment)	LCMGSGLNLCEPNNKEGYYGYTGAFR	5	99
8	trm|Q53H26|Q53H26_HUMAN	Transferrin variant (Fragment)	LKCDEWSVNSVGK	7	99
8	trm|Q53H26|Q53H26_HUMAN	Transferrin variant (Fragment)	MYLGYEYVTAIR	11	99
8	trm|Q53H26|Q53H26_HUMAN	Transferrin variant (Fragment)	NLNEKDYELLCLDGTR	11	99
8	trm|Q53H26|Q53H26_HUMAN	Transferrin variant (Fragment)	SAGWNIPIGLLYCDLPEPR	10	99
8	trm|Q53H26|Q53H26_HUMAN	Transferrin variant (Fragment)	SASDLTWDNLK	13	99
8	trm|Q53H26|Q53H26_HUMAN	Transferrin variant (Fragment)	SDNCEDTPEAGYFAVAVVK	5	99
8	trm|Q53H26|Q53H26_HUMAN	Transferrin variant (Fragment)	SETKDLLFR	3	99
8	trm|Q53H26|Q53H26_HUMAN	Transferrin variant (Fragment)	SKEFQLFSSPHGK	4	99
8	trm|Q53H26|Q53H26_HUMAN	Transferrin variant (Fragment)	SVIPSDGPSVACVK	19	99
8	trm|Q53H26|Q53H26_HUMAN	Transferrin variant (Fragment)	TAGWNIPMGLLYNK	12	99
8	trm|Q53H26|Q53H26_HUMAN	Transferrin variant (Fragment)	WCAVSEHEATK	10	99
8	trm|Q53H26|Q53H26_HUMAN	Transferrin variant (Fragment)	YLGEEYVK	20	99
8	trm|Q53H26|Q53H26_HUMAN	Transferrin variant (Fragment)	YYGYTGAFR	5	99
8	trm|Q53H26|Q53H26_HUMAN	Transferrin variant (Fragment)	DKEACVHK	3	98
8	trm|Q53H26|Q53H26_HUMAN	Transferrin variant (Fragment)	KDSSLCK	6	98
8	trm|Q53H26|Q53H26_HUMAN	Transferrin variant (Fragment)	GDVAFVK	16	95
8	trm|Q53H26|Q53H26_HUMAN	Transferrin variant (Fragment)	KSASDLTWDNLK	5	95
9	spt|P01024|CO3_HUMAN	Complement C3 precursor [Contains: Complement C3 beta chain; Complement C3 alpha chain; C3a anaphylatoxin; Complement C3b alpha' chain; Complement C3c fragment; Complement C3dg fragment; Complement C3g fragment; Complement C3d fragment; Complement C3f fragment]	ACEPGVDYVYK	6	99
9	spt|P01024|CO3_HUMAN	Complement C3 precursor [Contains: Complement C3 beta chain; Complement C3 alpha chain; C3a anaphylatoxin; Complement C3b alpha' chain; Complement C3c fragment; Complement C3dg fragment; Complement C3g fragment; Complement C3d fragment; Complement C3f fragment]	AGDFLEANYMNLQR	11	99
9	spt|P01024|CO3_HUMAN	Complement C3 precursor [Contains: Complement C3 beta chain; Complement C3 alpha chain; C3a anaphylatoxin; Complement C3b alpha' chain; Complement C3c fragment; Complement C3dg fragment; Complement C3g fragment; Complement C3d fragment; Complement C3f fragment]	AKDQLTCNKFDLK	4	99
9	spt|P01024|CO3_HUMAN	Complement C3 precursor [Contains: Complement C3 beta chain; Complement C3 alpha chain; C3a anaphylatoxin; Complement C3b alpha' chain; Complement C3c fragment; Complement C3dg fragment; Complement C3g fragment; Complement C3d fragment; Complement C3f fragment]	DSCVGSLVVK	1	99
9	spt|P01024|CO3_HUMAN	Complement C3 precursor [Contains: Complement C3 beta chain; Complement C3 alpha chain; C3a anaphylatoxin; Complement C3b alpha' chain; Complement C3c fragment; Complement C3dg fragment; Complement C3g fragment; Complement C3d fragment; Complement C3f fragment]	DTWVEHWPEEDECQDEENQK	2	99
9	spt|P01024|CO3_HUMAN	Complement C3 precursor [Contains: Complement C3 beta chain; Complement C3 alpha chain; C3a anaphylatoxin; Complement C3b alpha' chain; Complement C3c fragment; Complement C3dg fragment; Complement C3g fragment; Complement C3d fragment; Complement C3f fragment]	EALKLEEK	3	99
9	spt|P01024|CO3_HUMAN	Complement C3 precursor [Contains: Complement C3 beta chain; Complement C3 alpha chain; C3a anaphylatoxin; Complement C3b alpha' chain; Complement C3c fragment; Complement C3dg fragment; Complement C3g fragment; Complement C3d fragment; Complement C3f fragment]	EDIPPADLSDQVPDTESETR	6	99
9	spt|P01024|CO3_HUMAN	Complement C3 precursor [Contains: Complement C3 beta chain; Complement C3 alpha chain; C3a anaphylatoxin; Complement C3b alpha' chain; Complement C3c fragment; Complement C3dg fragment; Complement C3g fragment; Complement C3d fragment; Complement C3f fragment]	EGVQKEDIPPADLSDQVPDTESETR	7	99
9	spt|P01024|CO3_HUMAN	Complement C3 precursor [Contains: Complement C3 beta chain; Complement C3 alpha chain; C3a anaphylatoxin; Complement C3b alpha' chain; Complement C3c fragment; Complement C3dg fragment; Complement C3g fragment; Complement C3d fragment; Complement C3f fragment]	EPGQDLVVLPLSITTDFIPSFR	5	99
9	spt|P01024|CO3_HUMAN	Complement C3 precursor [Contains: Complement C3 beta chain; Complement C3 alpha chain; C3a anaphylatoxin; Complement C3b alpha' chain; Complement C3c fragment; Complement C3dg fragment; Complement C3g fragment; Complement C3d fragment; Complement C3f fragment]	EYVLPSFEVIVEPTEK	2	99
9	spt|P01024|CO3_HUMAN	Complement C3 precursor [Contains: Complement C3 beta chain; Complement C3 alpha chain; C3a anaphylatoxin; Complement C3b alpha' chain; Complement C3c fragment; Complement C3dg fragment; Complement C3g fragment; Complement C3d fragment; Complement C3f fragment]	GLEVTITAR	1	99
9	spt|P01024|CO3_HUMAN	Complement C3 precursor [Contains: Complement C3 beta chain; Complement C3 alpha chain; C3a anaphylatoxin; Complement C3b alpha' chain; Complement C3c fragment; Complement C3dg fragment; Complement C3g fragment; Complement C3d fragment; Complement C3f fragment]	GYTQQLAFR	4	99
9	spt|P01024|CO3_HUMAN	Complement C3 precursor [Contains: Complement C3 beta chain; Complement C3 alpha chain; C3a anaphylatoxin; Complement C3b alpha' chain; Complement C3c fragment; Complement C3dg fragment; Complement C3g fragment; Complement C3d fragment; Complement C3f fragment]	ILLQGTPVAQMTEDAVDAER	17	99
9	spt|P01024|CO3_HUMAN	Complement C3 precursor [Contains: Complement C3 beta chain; Complement C3 alpha chain; C3a anaphylatoxin; Complement C3b alpha' chain; Complement C3c fragment; Complement C3dg fragment; Complement C3g fragment; Complement C3d fragment; Complement C3f fragment]	IPIEDGSGEVVLSR	7	99
9	spt|P01024|CO3_HUMAN	Complement C3 precursor [Contains: Complement C3 beta chain; Complement C3 alpha chain; C3a anaphylatoxin; Complement C3b alpha' chain; Complement C3c fragment; Complement C3dg fragment; Complement C3g fragment; Complement C3d fragment; Complement C3f fragment]	KGYTQQLAFR	1	99
9	spt|P01024|CO3_HUMAN	Complement C3 precursor [Contains: Complement C3 beta chain; Complement C3 alpha chain; C3a anaphylatoxin; Complement C3b alpha' chain; Complement C3c fragment; Complement C3dg fragment; Complement C3g fragment; Complement C3d fragment; Complement C3f fragment]	KLVLSSEK	5	99
9	spt|P01024|CO3_HUMAN	Complement C3 precursor [Contains: Complement C3 beta chain; Complement C3 alpha chain; C3a anaphylatoxin; Complement C3b alpha' chain; Complement C3c fragment; Complement C3dg fragment; Complement C3g fragment; Complement C3d fragment; Complement C3f fragment]	KQELSEAEQATR	12	99
9	spt|P01024|CO3_HUMAN	Complement C3 precursor [Contains: Complement C3 beta chain; Complement C3 alpha chain; C3a anaphylatoxin; Complement C3b alpha' chain; Complement C3c fragment; Complement C3dg fragment; Complement C3g fragment; Complement C3d fragment; Complement C3f fragment]	LKGPLLNK	3	99
9	spt|P01024|CO3_HUMAN	Complement C3 precursor [Contains: Complement C3 beta chain; Complement C3 alpha chain; C3a anaphylatoxin; Complement C3b alpha' chain; Complement C3c fragment; Complement C3dg fragment; Complement C3g fragment; Complement C3d fragment; Complement C3f fragment]	LVAYYTLIGASGQR	10	99
9	spt|P01024|CO3_HUMAN	Complement C3 precursor [Contains: Complement C3 beta chain; Complement C3 alpha chain; C3a anaphylatoxin; Complement C3b alpha' chain; Complement C3c fragment; Complement C3dg fragment; Complement C3g fragment; Complement C3d fragment; Complement C3f fragment]	NTMILEICTR	3	99
9	spt|P01024|CO3_HUMAN	Complement C3 precursor [Contains: Complement C3 beta chain; Complement C3 alpha chain; C3a anaphylatoxin; Complement C3b alpha' chain; Complement C3c fragment; Complement C3dg fragment; Complement C3g fragment; Complement C3d fragment; Complement C3f fragment]	QELSEAEQATR	7	99
9	spt|P01024|CO3_HUMAN	Complement C3 precursor [Contains: Complement C3 beta chain; Complement C3 alpha chain; C3a anaphylatoxin; Complement C3b alpha' chain; Complement C3c fragment; Complement C3dg fragment; Complement C3g fragment; Complement C3d fragment; Complement C3f fragment]	QPSSAFAAFVK	12	99
9	spt|P01024|CO3_HUMAN	Complement C3 precursor [Contains: Complement C3 beta chain; Complement C3 alpha chain; C3a anaphylatoxin; Complement C3b alpha' chain; Complement C3c fragment; Complement C3dg fragment; Complement C3g fragment; Complement C3d fragment; Complement C3f fragment]	QPVPGQQMTLK	11	99
9	spt|P01024|CO3_HUMAN	Complement C3 precursor [Contains: Complement C3 beta chain; Complement C3 alpha chain; C3a anaphylatoxin; Complement C3b alpha' chain; Complement C3c fragment; Complement C3dg fragment; Complement C3g fragment; Complement C3d fragment; Complement C3f fragment]	RIPIEDGSGEVVLSR	9	99
9	spt|P01024|CO3_HUMAN	Complement C3 precursor [Contains: Complement C3 beta chain; Complement C3 alpha chain; C3a anaphylatoxin; Complement C3b alpha' chain; Complement C3c fragment; Complement C3dg fragment; Complement C3g fragment; Complement C3d fragment; Complement C3f fragment]	SDDKVTLEER	5	99
9	spt|P01024|CO3_HUMAN	Complement C3 precursor [Contains: Complement C3 beta chain; Complement C3 alpha chain; C3a anaphylatoxin; Complement C3b alpha' chain; Complement C3c fragment; Complement C3dg fragment; Complement C3g fragment; Complement C3d fragment; Complement C3f fragment]	SGIPIVTSPYQIHFTK	11	99
9	spt|P01024|CO3_HUMAN	Complement C3 precursor [Contains: Complement C3 beta chain; Complement C3 alpha chain; C3a anaphylatoxin; Complement C3b alpha' chain; Complement C3c fragment; Complement C3dg fragment; Complement C3g fragment; Complement C3d fragment; Complement C3f fragment]	SGQSEDRQPVPGQQMTLK	10	99
9	spt|P01024|CO3_HUMAN	Complement C3 precursor [Contains: Complement C3 beta chain; Complement C3 alpha chain; C3a anaphylatoxin; Complement C3b alpha' chain; Complement C3c fragment; Complement C3dg fragment; Complement C3g fragment; Complement C3d fragment; Complement C3f fragment]	SGSDEVQVGQQR	13	99
9	spt|P01024|CO3_HUMAN	Complement C3 precursor [Contains: Complement C3 beta chain; Complement C3 alpha chain; C3a anaphylatoxin; Complement C3b alpha' chain; Complement C3c fragment; Complement C3dg fragment; Complement C3g fragment; Complement C3d fragment; Complement C3f fragment]	SLYVSATVILHSGSDMVQAER	1	99
9	spt|P01024|CO3_HUMAN	Complement C3 precursor [Contains: Complement C3 beta chain; Complement C3 alpha chain; C3a anaphylatoxin; Complement C3b alpha' chain; Complement C3c fragment; Complement C3dg fragment; Complement C3g fragment; Complement C3d fragment; Complement C3f fragment]	SNLDEDIIAEENIVSR	14	99
9	spt|P01024|CO3_HUMAN	Complement C3 precursor [Contains: Complement C3 beta chain; Complement C3 alpha chain; C3a anaphylatoxin; Complement C3b alpha' chain; Complement C3c fragment; Complement C3dg fragment; Complement C3g fragment; Complement C3d fragment; Complement C3f fragment]	SPMYSIITPNILR	3	99
9	spt|P01024|CO3_HUMAN	Complement C3 precursor [Contains: Complement C3 beta chain; Complement C3 alpha chain; C3a anaphylatoxin; Complement C3b alpha' chain; Complement C3c fragment; Complement C3dg fragment; Complement C3g fragment; Complement C3d fragment; Complement C3f fragment]	SSLSVPYVIVPLK	9	99
9	spt|P01024|CO3_HUMAN	Complement C3 precursor [Contains: Complement C3 beta chain; Complement C3 alpha chain; C3a anaphylatoxin; Complement C3b alpha' chain; Complement C3c fragment; Complement C3dg fragment; Complement C3g fragment; Complement C3d fragment; Complement C3f fragment]	TELRPGETLNVNFLLR	6	99
9	spt|P01024|CO3_HUMAN	Complement C3 precursor [Contains: Complement C3 beta chain; Complement C3 alpha chain; C3a anaphylatoxin; Complement C3b alpha' chain; Complement C3c fragment; Complement C3dg fragment; Complement C3g fragment; Complement C3d fragment; Complement C3f fragment]	TGLQEVEVK	5	99
9	spt|P01024|CO3_HUMAN	Complement C3 precursor [Contains: Complement C3 beta chain; Complement C3 alpha chain; C3a anaphylatoxin; Complement C3b alpha' chain; Complement C3c fragment; Complement C3dg fragment; Complement C3g fragment; Complement C3d fragment; Complement C3f fragment]	TKKQELSEAEQATR	5	99
9	spt|P01024|CO3_HUMAN	Complement C3 precursor [Contains: Complement C3 beta chain; Complement C3 alpha chain; C3a anaphylatoxin; Complement C3b alpha' chain; Complement C3c fragment; Complement C3dg fragment; Complement C3g fragment; Complement C3d fragment; Complement C3f fragment]	TVMVNIENPEGIPVK	9	99
9	spt|P01024|CO3_HUMAN	Complement C3 precursor [Contains: Complement C3 beta chain; Complement C3 alpha chain; C3a anaphylatoxin; Complement C3b alpha' chain; Complement C3c fragment; Complement C3dg fragment; Complement C3g fragment; Complement C3d fragment; Complement C3f fragment]	VELLHNPAFCSLATTK	5	99
9	spt|P01024|CO3_HUMAN	Complement C3 precursor [Contains: Complement C3 beta chain; Complement C3 alpha chain; C3a anaphylatoxin; Complement C3b alpha' chain; Complement C3c fragment; Complement C3dg fragment; Complement C3g fragment; Complement C3d fragment; Complement C3f fragment]	VPVAVQGEDTVQSLTQGDGVAK	12	99
9	spt|P01024|CO3_HUMAN	Complement C3 precursor [Contains: Complement C3 beta chain; Complement C3 alpha chain; C3a anaphylatoxin; Complement C3b alpha' chain; Complement C3c fragment; Complement C3dg fragment; Complement C3g fragment; Complement C3d fragment; Complement C3f fragment]	VQLSNDFDEYIMAIEQTIK	6	99
9	spt|P01024|CO3_HUMAN	Complement C3 precursor [Contains: Complement C3 beta chain; Complement C3 alpha chain; C3a anaphylatoxin; Complement C3b alpha' chain; Complement C3c fragment; Complement C3dg fragment; Complement C3g fragment; Complement C3d fragment; Complement C3f fragment]	VTIKPAPETEK	1	99
9	spt|P01024|CO3_HUMAN	Complement C3 precursor [Contains: Complement C3 beta chain; Complement C3 alpha chain; C3a anaphylatoxin; Complement C3b alpha' chain; Complement C3c fragment; Complement C3dg fragment; Complement C3g fragment; Complement C3d fragment; Complement C3f fragment]	VVLVAVDK	1	99
9	spt|P01024|CO3_HUMAN	Complement C3 precursor [Contains: Complement C3 beta chain; Complement C3 alpha chain; C3a anaphylatoxin; Complement C3b alpha' chain; Complement C3c fragment; Complement C3dg fragment; Complement C3g fragment; Complement C3d fragment; Complement C3f fragment]	AAVYHHFISDGVR	7	98
9	spt|P01024|CO3_HUMAN	Complement C3 precursor [Contains: Complement C3 beta chain; Complement C3 alpha chain; C3a anaphylatoxin; Complement C3b alpha' chain; Complement C3c fragment; Complement C3dg fragment; Complement C3g fragment; Complement C3d fragment; Complement C3f fragment]	DFDFVPPVVR	2	98
9	spt|P01024|CO3_HUMAN	Complement C3 precursor [Contains: Complement C3 beta chain; Complement C3 alpha chain; C3a anaphylatoxin; Complement C3b alpha' chain; Complement C3c fragment; Complement C3dg fragment; Complement C3g fragment; Complement C3d fragment; Complement C3f fragment]	GQGTLSVVTMYHAK	10	98
9	spt|P01024|CO3_HUMAN	Complement C3 precursor [Contains: Complement C3 beta chain; Complement C3 alpha chain; C3a anaphylatoxin; Complement C3b alpha' chain; Complement C3c fragment; Complement C3dg fragment; Complement C3g fragment; Complement C3d fragment; Complement C3f fragment]	TFISPIK	12	98
9	spt|P01024|CO3_HUMAN	Complement C3 precursor [Contains: Complement C3 beta chain; Complement C3 alpha chain; C3a anaphylatoxin; Complement C3b alpha' chain; Complement C3c fragment; Complement C3dg fragment; Complement C3g fragment; Complement C3d fragment; Complement C3f fragment]	QGALELIK	6	96
10	trm|Q0V924|Q0V924_HUMAN	Valosin-containing protein	ASGADSKGDDLSTAILK	8	99
10	trm|Q0V924|Q0V924_HUMAN	Valosin-containing protein	DVDLEFLAK	7	99
10	trm|Q0V924|Q0V924_HUMAN	Valosin-containing protein	ELQELVQYPVEHPDKFLK	3	99
10	trm|Q0V924|Q0V924_HUMAN	Valosin-containing protein	EMVELPLRHPALFK	4	99
10	trm|Q0V924|Q0V924_HUMAN	Valosin-containing protein	ESIESEIR	5	99
10	trm|Q0V924|Q0V924_HUMAN	Valosin-containing protein	ETVVEVPQVTWEDIGGLEDVK	6	99
10	trm|Q0V924|Q0V924_HUMAN	Valosin-containing protein	ETVVEVPQVTWEDIGGLEDVKR	5	99
10	trm|Q0V924|Q0V924_HUMAN	Valosin-containing protein	EVDIGIPDATGR	9	99
10	trm|Q0V924|Q0V924_HUMAN	Valosin-containing protein	GGNIGDGGGAADR	17	99
10	trm|Q0V924|Q0V924_HUMAN	Valosin-containing protein	GILLYGPPGTGK	9	99
10	trm|Q0V924|Q0V924_HUMAN	Valosin-containing protein	GVLFYGPPGCGK	8	99
10	trm|Q0V924|Q0V924_HUMAN	Valosin-containing protein	KYEMFAQTLQQSR	6	99
10	trm|Q0V924|Q0V924_HUMAN	Valosin-containing protein	LAGESESNLR	12	99
10	trm|Q0V924|Q0V924_HUMAN	Valosin-containing protein	LDQLIYIPLPDEK	6	99
10	trm|Q0V924|Q0V924_HUMAN	Valosin-containing protein	LEILQIHTK	4	99
10	trm|Q0V924|Q0V924_HUMAN	Valosin-containing protein	LGDVISIQPCPDVK	7	99
10	trm|Q0V924|Q0V924_HUMAN	Valosin-containing protein	LIVDEAINEDNSVVSLSQPK	13	99
10	trm|Q0V924|Q0V924_HUMAN	Valosin-containing protein	MDELQLFR	9	99
10	trm|Q0V924|Q0V924_HUMAN	Valosin-containing protein	MTNGFSGADLTEICQR	7	99
10	trm|Q0V924|Q0V924_HUMAN	Valosin-containing protein	NAPAIIFIDELDAIAPK	8	99
10	trm|Q0V924|Q0V924_HUMAN	Valosin-containing protein	QAAPCVLFFDELDSIAK	8	99
10	trm|Q0V924|Q0V924_HUMAN	Valosin-containing protein	QTNPSAMEVEEDDPVPEIR	7	99
10	trm|Q0V924|Q0V924_HUMAN	Valosin-containing protein	SVSDNDIR	9	99
10	trm|Q0V924|Q0V924_HUMAN	Valosin-containing protein	VINQILTEMDGMSTK	9	99
10	trm|Q0V924|Q0V924_HUMAN	Valosin-containing protein	WALSQSNPSALR	5	99
10	trm|Q0V924|Q0V924_HUMAN	Valosin-containing protein	GPELLTMWFGESEANVR	4	98
10	trm|Q0V924|Q0V924_HUMAN	Valosin-containing protein	KAFEEAEK	4	95
11	trm|Q6P4C7|Q6P4C7_HUMAN	KRT8 protein (Fragment)	AQYEDIANR	12	99
11	trm|Q6P4C7|Q6P4C7_HUMAN	KRT8 protein (Fragment)	ASLEAAIADAEQR	12	99
11	trm|Q6P4C7|Q6P4C7_HUMAN	KRT8 protein (Fragment)	DVDEAYMNKVELESR	4	99
11	trm|Q6P4C7|Q6P4C7_HUMAN	KRT8 protein (Fragment)	ELQSQISDTSVVLSMDNSR	9	99
11	trm|Q6P4C7|Q6P4C7_HUMAN	KRT8 protein (Fragment)	GELAIKDANAK	4	99
11	trm|Q6P4C7|Q6P4C7_HUMAN	KRT8 protein (Fragment)	GGLGGGYGGASGMGG	1	99
11	trm|Q6P4C7|Q6P4C7_HUMAN	KRT8 protein (Fragment)	GSGAGSSSFSR	4	99
11	trm|Q6P4C7|Q6P4C7_HUMAN	KRT8 protein (Fragment)	ISSSSFSR	4	99
11	trm|Q6P4C7|Q6P4C7_HUMAN	KRT8 protein (Fragment)	KLLEGEESR	6	99
11	trm|Q6P4C7|Q6P4C7_HUMAN	KRT8 protein (Fragment)	LEGLTDEINFLR	12	99
11	trm|Q6P4C7|Q6P4C7_HUMAN	KRT8 protein (Fragment)	LLEGEESR	8	99
11	trm|Q6P4C7|Q6P4C7_HUMAN	KRT8 protein (Fragment)	LQAEIEGLK	15	99
11	trm|Q6P4C7|Q6P4C7_HUMAN	KRT8 protein (Fragment)	LQAEIEGLKGQR	9	99
11	trm|Q6P4C7|Q6P4C7_HUMAN	KRT8 protein (Fragment)	LSELEAALQR	17	99
11	trm|Q6P4C7|Q6P4C7_HUMAN	KRT8 protein (Fragment)	LVLEVDPNIQAVR	1	99
11	trm|Q6P4C7|Q6P4C7_HUMAN	KRT8 protein (Fragment)	LVSESSDVLP	14	99
11	trm|Q6P4C7|Q6P4C7_HUMAN	KRT8 protein (Fragment)	LVSESSDVLPK	6	99
11	trm|Q6P4C7|Q6P4C7_HUMAN	KRT8 protein (Fragment)	QLYEEEIR	4	99
11	trm|Q6P4C7|Q6P4C7_HUMAN	KRT8 protein (Fragment)	SLDMDSIIAEVK	15	99
11	trm|Q6P4C7|Q6P4C7_HUMAN	KRT8 protein (Fragment)	SNMDNMFESYINNLR	9	99
11	trm|Q6P4C7|Q6P4C7_HUMAN	KRT8 protein (Fragment)	TEISEMNR	3	99
11	trm|Q6P4C7|Q6P4C7_HUMAN	KRT8 protein (Fragment)	TKTEISEMNR	5	99
11	trm|Q6P4C7|Q6P4C7_HUMAN	KRT8 protein (Fragment)	TVNQSLLSPLVLEVDPNIQAVR	1	99
11	trm|Q6P4C7|Q6P4C7_HUMAN	KRT8 protein (Fragment)	VLEVDPNIQAVR	4	99
11	trm|Q6P4C7|Q6P4C7_HUMAN	KRT8 protein (Fragment)	YEELQSLAGK	4	99
11	trm|Q6P4C7|Q6P4C7_HUMAN	KRT8 protein (Fragment)	LESGMQNMSIHTK	8	98
11	trm|Q6P4C7|Q6P4C7_HUMAN	KRT8 protein (Fragment)	LSPLVLEVDPNIQAVR	4	98
11	trm|Q6P4C7|Q6P4C7_HUMAN	KRT8 protein (Fragment)	TEMENEFVLIK	5	98
11	trm|Q6P4C7|Q6P4C7_HUMAN	KRT8 protein (Fragment)	WSLLQQQK	6	98
11	trm|Q6P4C7|Q6P4C7_HUMAN	KRT8 protein (Fragment)	DGKLVSESSDVLP	3	97
11	trm|Q6P4C7|Q6P4C7_HUMAN	KRT8 protein (Fragment)	LEAELGNMQGLVEDFK	5	96
12	spt|P11021|GRP78_HUMAN	78 kDa glucose-regulated protein precursor (GRP 78) (Heat shock 70 kDa protein 5) (Immunoglobulin heavy chain-binding protein) (BiP) (Endoplasmic reticulum lumenal Ca(2+)-binding protein grp78)	AKFEELNMDLFR	7	99
12	spt|P11021|GRP78_HUMAN	78 kDa glucose-regulated protein precursor (GRP 78) (Heat shock 70 kDa protein 5) (Immunoglobulin heavy chain-binding protein) (BiP) (Endoplasmic reticulum lumenal Ca(2+)-binding protein grp78)	DAGTIAGLNVMR	14	99
12	spt|P11021|GRP78_HUMAN	78 kDa glucose-regulated protein precursor (GRP 78) (Heat shock 70 kDa protein 5) (Immunoglobulin heavy chain-binding protein) (BiP) (Endoplasmic reticulum lumenal Ca(2+)-binding protein grp78)	DNHLLGTFDLTGIPPAPR	9	99
12	spt|P11021|GRP78_HUMAN	78 kDa glucose-regulated protein precursor (GRP 78) (Heat shock 70 kDa protein 5) (Immunoglobulin heavy chain-binding protein) (BiP) (Endoplasmic reticulum lumenal Ca(2+)-binding protein grp78)	EFFNGKEPSR	3	99
12	spt|P11021|GRP78_HUMAN	78 kDa glucose-regulated protein precursor (GRP 78) (Heat shock 70 kDa protein 5) (Immunoglobulin heavy chain-binding protein) (BiP) (Endoplasmic reticulum lumenal Ca(2+)-binding protein grp78)	ELEEIVQPIISK	10	99
12	spt|P11021|GRP78_HUMAN	78 kDa glucose-regulated protein precursor (GRP 78) (Heat shock 70 kDa protein 5) (Immunoglobulin heavy chain-binding protein) (BiP) (Endoplasmic reticulum lumenal Ca(2+)-binding protein grp78)	IEIESFYEGEDFSETLTR	4	99
12	spt|P11021|GRP78_HUMAN	78 kDa glucose-regulated protein precursor (GRP 78) (Heat shock 70 kDa protein 5) (Immunoglobulin heavy chain-binding protein) (BiP) (Endoplasmic reticulum lumenal Ca(2+)-binding protein grp78)	IINEPTAAAIAYGLDK	12	99
12	spt|P11021|GRP78_HUMAN	78 kDa glucose-regulated protein precursor (GRP 78) (Heat shock 70 kDa protein 5) (Immunoglobulin heavy chain-binding protein) (BiP) (Endoplasmic reticulum lumenal Ca(2+)-binding protein grp78)	IINEPTAAAIAYGLDKR	7	99
12	spt|P11021|GRP78_HUMAN	78 kDa glucose-regulated protein precursor (GRP 78) (Heat shock 70 kDa protein 5) (Immunoglobulin heavy chain-binding protein) (BiP) (Endoplasmic reticulum lumenal Ca(2+)-binding protein grp78)	ITITNDQNR	8	99
12	spt|P11021|GRP78_HUMAN	78 kDa glucose-regulated protein precursor (GRP 78) (Heat shock 70 kDa protein 5) (Immunoglobulin heavy chain-binding protein) (BiP) (Endoplasmic reticulum lumenal Ca(2+)-binding protein grp78)	ITPSYVAFTPEGER	12	99
12	spt|P11021|GRP78_HUMAN	78 kDa glucose-regulated protein precursor (GRP 78) (Heat shock 70 kDa protein 5) (Immunoglobulin heavy chain-binding protein) (BiP) (Endoplasmic reticulum lumenal Ca(2+)-binding protein grp78)	KSDIDEIVLVGGSTR	4	99
12	spt|P11021|GRP78_HUMAN	78 kDa glucose-regulated protein precursor (GRP 78) (Heat shock 70 kDa protein 5) (Immunoglobulin heavy chain-binding protein) (BiP) (Endoplasmic reticulum lumenal Ca(2+)-binding protein grp78)	KSQIFSTASDNQPTVTIK	4	99
12	spt|P11021|GRP78_HUMAN	78 kDa glucose-regulated protein precursor (GRP 78) (Heat shock 70 kDa protein 5) (Immunoglobulin heavy chain-binding protein) (BiP) (Endoplasmic reticulum lumenal Ca(2+)-binding protein grp78)	LTPEEIER	11	99
12	spt|P11021|GRP78_HUMAN	78 kDa glucose-regulated protein precursor (GRP 78) (Heat shock 70 kDa protein 5) (Immunoglobulin heavy chain-binding protein) (BiP) (Endoplasmic reticulum lumenal Ca(2+)-binding protein grp78)	LYGSAGPPPTGEEDTAEKDEL	14	99
12	spt|P11021|GRP78_HUMAN	78 kDa glucose-regulated protein precursor (GRP 78) (Heat shock 70 kDa protein 5) (Immunoglobulin heavy chain-binding protein) (BiP) (Endoplasmic reticulum lumenal Ca(2+)-binding protein grp78)	NQLTSNPENTVFDAK	14	99
12	spt|P11021|GRP78_HUMAN	78 kDa glucose-regulated protein precursor (GRP 78) (Heat shock 70 kDa protein 5) (Immunoglobulin heavy chain-binding protein) (BiP) (Endoplasmic reticulum lumenal Ca(2+)-binding protein grp78)	NQLTSNPENTVFDAKR	7	99
12	spt|P11021|GRP78_HUMAN	78 kDa glucose-regulated protein precursor (GRP 78) (Heat shock 70 kDa protein 5) (Immunoglobulin heavy chain-binding protein) (BiP) (Endoplasmic reticulum lumenal Ca(2+)-binding protein grp78)	NTVVPTKK	3	99
12	spt|P11021|GRP78_HUMAN	78 kDa glucose-regulated protein precursor (GRP 78) (Heat shock 70 kDa protein 5) (Immunoglobulin heavy chain-binding protein) (BiP) (Endoplasmic reticulum lumenal Ca(2+)-binding protein grp78)	QATKDAGTIAGLNVMR	4	99
12	spt|P11021|GRP78_HUMAN	78 kDa glucose-regulated protein precursor (GRP 78) (Heat shock 70 kDa protein 5) (Immunoglobulin heavy chain-binding protein) (BiP) (Endoplasmic reticulum lumenal Ca(2+)-binding protein grp78)	SDIDEIVLVGGSTR	4	99
12	spt|P11021|GRP78_HUMAN	78 kDa glucose-regulated protein precursor (GRP 78) (Heat shock 70 kDa protein 5) (Immunoglobulin heavy chain-binding protein) (BiP) (Endoplasmic reticulum lumenal Ca(2+)-binding protein grp78)	SQIFSTASDNQPTVTIK	12	99
12	spt|P11021|GRP78_HUMAN	78 kDa glucose-regulated protein precursor (GRP 78) (Heat shock 70 kDa protein 5) (Immunoglobulin heavy chain-binding protein) (BiP) (Endoplasmic reticulum lumenal Ca(2+)-binding protein grp78)	TFAPEEISAMVLTK	11	99
12	spt|P11021|GRP78_HUMAN	78 kDa glucose-regulated protein precursor (GRP 78) (Heat shock 70 kDa protein 5) (Immunoglobulin heavy chain-binding protein) (BiP) (Endoplasmic reticulum lumenal Ca(2+)-binding protein grp78)	TWNDPSVQQDIK	5	99
12	spt|P11021|GRP78_HUMAN	78 kDa glucose-regulated protein precursor (GRP 78) (Heat shock 70 kDa protein 5) (Immunoglobulin heavy chain-binding protein) (BiP) (Endoplasmic reticulum lumenal Ca(2+)-binding protein grp78)	VEIIANDQGNR	11	99
12	spt|P11021|GRP78_HUMAN	78 kDa glucose-regulated protein precursor (GRP 78) (Heat shock 70 kDa protein 5) (Immunoglobulin heavy chain-binding protein) (BiP) (Endoplasmic reticulum lumenal Ca(2+)-binding protein grp78)	VYEGERPLTK	6	99
12	spt|P11021|GRP78_HUMAN	78 kDa glucose-regulated protein precursor (GRP 78) (Heat shock 70 kDa protein 5) (Immunoglobulin heavy chain-binding protein) (BiP) (Endoplasmic reticulum lumenal Ca(2+)-binding protein grp78)	LIGDAAK	11	98
12	spt|P11021|GRP78_HUMAN	78 kDa glucose-regulated protein precursor (GRP 78) (Heat shock 70 kDa protein 5) (Immunoglobulin heavy chain-binding protein) (BiP) (Endoplasmic reticulum lumenal Ca(2+)-binding protein grp78)	VLEDSDLK	5	98
12	spt|P11021|GRP78_HUMAN	78 kDa glucose-regulated protein precursor (GRP 78) (Heat shock 70 kDa protein 5) (Immunoglobulin heavy chain-binding protein) (BiP) (Endoplasmic reticulum lumenal Ca(2+)-binding protein grp78)	NELESYAYSLK	11	97
12	spt|P11021|GRP78_HUMAN	78 kDa glucose-regulated protein precursor (GRP 78) (Heat shock 70 kDa protein 5) (Immunoglobulin heavy chain-binding protein) (BiP) (Endoplasmic reticulum lumenal Ca(2+)-binding protein grp78)	VTHAVVTVPAYFNDAQR	9	97
13	trm|Q58J86|Q58J86_HUMAN	Elongation factor 2	AGIIASAR	9	99
13	trm|Q58J86|Q58J86_HUMAN	Elongation factor 2	ALLELQLEPEELYQTFQR	2	99
13	trm|Q58J86|Q58J86_HUMAN	Elongation factor 2	ARPFPDGLAEDIDKGEVSAR	10	99
13	trm|Q58J86|Q58J86_HUMAN	Elongation factor 2	AYLPVNESFGFTADLR	11	99
13	trm|Q58J86|Q58J86_HUMAN	Elongation factor 2	CELLYEGPPDDEAAMGIK	6	99
13	trm|Q58J86|Q58J86_HUMAN	Elongation factor 2	CLYASVLTAQPR	10	99
13	trm|Q58J86|Q58J86_HUMAN	Elongation factor 2	EGIPALDNFLDKL	8	99
13	trm|Q58J86|Q58J86_HUMAN	Elongation factor 2	ETVSEESNVLCLSK	11	99
13	trm|Q58J86|Q58J86_HUMAN	Elongation factor 2	FSVSPVVR	11	99
13	trm|Q58J86|Q58J86_HUMAN	Elongation factor 2	GEGQLGPAER	10	99
13	trm|Q58J86|Q58J86_HUMAN	Elongation factor 2	GGGQIIPTAR	17	99
13	trm|Q58J86|Q58J86_HUMAN	Elongation factor 2	GHVFEESQVAGTPMFVVK	5	99
13	trm|Q58J86|Q58J86_HUMAN	Elongation factor 2	GPLMMYISK	13	99
13	trm|Q58J86|Q58J86_HUMAN	Elongation factor 2	KEDLYLKPIQR	2	99
13	trm|Q58J86|Q58J86_HUMAN	Elongation factor 2	PFPDGLAEDIDKGEVSAR	3	99
13	trm|Q58J86|Q58J86_HUMAN	Elongation factor 2	SDPVVSYR	4	99
13	trm|Q58J86|Q58J86_HUMAN	Elongation factor 2	STLTDSLVCK	5	99
13	trm|Q58J86|Q58J86_HUMAN	Elongation factor 2	VFSGLVSTGLK	7	99
13	trm|Q58J86|Q58J86_HUMAN	Elongation factor 2	VNFTVDQIR	19	99
13	trm|Q58J86|Q58J86_HUMAN	Elongation factor 2	YEWDVAEAR	5	99
14	spt|P08238|HS90B_HUMAN	Heat shock protein HSP 90-beta (HSP 84) (HSP 90)	ADHGEPIGR	6	99
14	spt|P08238|HS90B_HUMAN	Heat shock protein HSP 90-beta (HSP 84) (HSP 90)	ADLINNLGTIAK	13	99
14	spt|P08238|HS90B_HUMAN	Heat shock protein HSP 90-beta (HSP 84) (HSP 90)	APFDLFENK	2	99
14	spt|P08238|HS90B_HUMAN	Heat shock protein HSP 90-beta (HSP 84) (HSP 90)	DNSTMGYMMAK	4	99
14	spt|P08238|HS90B_HUMAN	Heat shock protein HSP 90-beta (HSP 84) (HSP 90)	EDQTEYLEER	7	99
14	spt|P08238|HS90B_HUMAN	Heat shock protein HSP 90-beta (HSP 84) (HSP 90)	EGLELPEDEEEK	3	99
14	spt|P08238|HS90B_HUMAN	Heat shock protein HSP 90-beta (HSP 84) (HSP 90)	EGLELPEDEEEKK	3	99
14	spt|P08238|HS90B_HUMAN	Heat shock protein HSP 90-beta (HSP 84) (HSP 90)	EGLELPEDEEEKKK	6	99
14	spt|P08238|HS90B_HUMAN	Heat shock protein HSP 90-beta (HSP 84) (HSP 90)	EKYIDQEELNK	5	99
14	spt|P08238|HS90B_HUMAN	Heat shock protein HSP 90-beta (HSP 84) (HSP 90)	ELISNASDALDK	4	99
14	spt|P08238|HS90B_HUMAN	Heat shock protein HSP 90-beta (HSP 84) (HSP 90)	ELISNASDALDKIR	7	99
14	spt|P08238|HS90B_HUMAN	Heat shock protein HSP 90-beta (HSP 84) (HSP 90)	EQVANSAFVER	9	99
14	spt|P08238|HS90B_HUMAN	Heat shock protein HSP 90-beta (HSP 84) (HSP 90)	GFEVVYMTEPIDEYCVQQLK	2	99
14	spt|P08238|HS90B_HUMAN	Heat shock protein HSP 90-beta (HSP 84) (HSP 90)	GVVDSEDLPLNISR	11	99
14	spt|P08238|HS90B_HUMAN	Heat shock protein HSP 90-beta (HSP 84) (HSP 90)	HLEINPDHPIVETLR	5	99
14	spt|P08238|HS90B_HUMAN	Heat shock protein HSP 90-beta (HSP 84) (HSP 90)	HSQFIGYPITLYLEK	3	99
14	spt|P08238|HS90B_HUMAN	Heat shock protein HSP 90-beta (HSP 84) (HSP 90)	IDIIPNPQER	10	99
14	spt|P08238|HS90B_HUMAN	Heat shock protein HSP 90-beta (HSP 84) (HSP 90)	IEDVGSDEEDDSGKDKK	8	99
14	spt|P08238|HS90B_HUMAN	Heat shock protein HSP 90-beta (HSP 84) (HSP 90)	LGIHEDSTNR	6	99
14	spt|P08238|HS90B_HUMAN	Heat shock protein HSP 90-beta (HSP 84) (HSP 90)	LGLGIDEDEVAAEEPNAAVPDEIPPLEGDEDASR	11	99
14	spt|P08238|HS90B_HUMAN	Heat shock protein HSP 90-beta (HSP 84) (HSP 90)	NPDDITQEEYGEFYK	10	99
14	spt|P08238|HS90B_HUMAN	Heat shock protein HSP 90-beta (HSP 84) (HSP 90)	RAPFDLFENK	8	99
14	spt|P08238|HS90B_HUMAN	Heat shock protein HSP 90-beta (HSP 84) (HSP 90)	SIYYITGESK	5	99
14	spt|P08238|HS90B_HUMAN	Heat shock protein HSP 90-beta (HSP 84) (HSP 90)	SLTNDWEDHLAVK	11	99
14	spt|P08238|HS90B_HUMAN	Heat shock protein HSP 90-beta (HSP 84) (HSP 90)	TLTLVDTGIGMTK	11	99
14	spt|P08238|HS90B_HUMAN	Heat shock protein HSP 90-beta (HSP 84) (HSP 90)	YESLTDPSK	2	99
14	spt|P08238|HS90B_HUMAN	Heat shock protein HSP 90-beta (HSP 84) (HSP 90)	YESLTDPSKLDSGK	2	99
14	spt|P08238|HS90B_HUMAN	Heat shock protein HSP 90-beta (HSP 84) (HSP 90)	YIDQEELNK	8	99
14	spt|P08238|HS90B_HUMAN	Heat shock protein HSP 90-beta (HSP 84) (HSP 90)	SLVSVTK	3	97
14	spt|P08238|HS90B_HUMAN	Heat shock protein HSP 90-beta (HSP 84) (HSP 90)	VILHLKEDQTEYLEER	5	97
14	spt|P08238|HS90B_HUMAN	Heat shock protein HSP 90-beta (HSP 84) (HSP 90)	QKAEADKNDK	1	96
14	spt|P08238|HS90B_HUMAN	Heat shock protein HSP 90-beta (HSP 84) (HSP 90)	CLELFSELAEDKENYK	2	95
15	trm|Q53X65|Q53X65_HUMAN	GAPD protein (Fragment)	AENGKLVINGNPITIFQERDPSK	11	99
15	trm|Q53X65|Q53X65_HUMAN	GAPD protein (Fragment)	AGAHLQGGAK	8	99
15	trm|Q53X65|Q53X65_HUMAN	GAPD protein (Fragment)	ANVSVVDLTCR	2	99
15	trm|Q53X65|Q53X65_HUMAN	GAPD protein (Fragment)	DGRGALQNIIPASTGAAK	12	99
15	trm|Q53X65|Q53X65_HUMAN	GAPD protein (Fragment)	GALQNIIPASTGAAK	20	99
15	trm|Q53X65|Q53X65_HUMAN	GAPD protein (Fragment)	IISNASCTTNCLAPLAK	16	99
15	trm|Q53X65|Q53X65_HUMAN	GAPD protein (Fragment)	LISWYDNEFGYSNR	8	99
15	trm|Q53X65|Q53X65_HUMAN	GAPD protein (Fragment)	LVINGNPITIFQER	10	99
15	trm|Q53X65|Q53X65_HUMAN	GAPD protein (Fragment)	LVINGNPITIFQERDPSK	11	99
15	trm|Q53X65|Q53X65_HUMAN	GAPD protein (Fragment)	TVDGPSGK	11	99
15	trm|Q53X65|Q53X65_HUMAN	GAPD protein (Fragment)	VGVNGFGR	17	99
15	trm|Q53X65|Q53X65_HUMAN	GAPD protein (Fragment)	VIISAPSADAPMFVMGVNHEK	11	99
15	trm|Q53X65|Q53X65_HUMAN	GAPD protein (Fragment)	VIPELNGK	18	99
15	trm|Q53X65|Q53X65_HUMAN	GAPD protein (Fragment)	VPTANVSVVDL	2	99
15	trm|Q53X65|Q53X65_HUMAN	GAPD protein (Fragment)	VPTANVSVVDLTCR	16	99
15	trm|Q53X65|Q53X65_HUMAN	GAPD protein (Fragment)	VSVVDLTCR	2	99
15	trm|Q53X65|Q53X65_HUMAN	GAPD protein (Fragment)	VVDLMAHMASK	9	99
15	trm|Q53X65|Q53X65_HUMAN	GAPD protein (Fragment)	VVDLMAHMASKE	13	99
15	trm|Q53X65|Q53X65_HUMAN	GAPD protein (Fragment)	WGDAGAEYVVESTGVFTTMEK	7	99
15	trm|Q53X65|Q53X65_HUMAN	GAPD protein (Fragment)	AENGKLVINGNPITIFQER	7	98
15	trm|Q53X65|Q53X65_HUMAN	GAPD protein (Fragment)	VIISAPSADAPMFV	3	98
15	trm|Q53X65|Q53X65_HUMAN	GAPD protein (Fragment)	AAFNSGK	9	97
15	trm|Q53X65|Q53X65_HUMAN	GAPD protein (Fragment)	IISNASCTTN	9	97
15	trm|Q53X65|Q53X65_HUMAN	GAPD protein (Fragment)	AGAHLQGGAKR	4	96
15	trm|Q53X65|Q53X65_HUMAN	GAPD protein (Fragment)	LTGMAFR	12	96
16	spt|P14618|KPYM_HUMAN	Pyruvate kinase isozymes M1/M2 (EC 2.7.1.40) (Pyruvate kinase muscle isozyme) (Pyruvate kinase 2/3) (Cytosolic thyroid hormone-binding protein) (CTHBP) (THBP1)	AEGSDVANAVLDGADCIMLSGETAK	15	99
16	spt|P14618|KPYM_HUMAN	Pyruvate kinase isozymes M1/M2 (EC 2.7.1.40) (Pyruvate kinase muscle isozyme) (Pyruvate kinase 2/3) (Cytosolic thyroid hormone-binding protein) (CTHBP) (THBP1)	APIIAVTR	12	99
16	spt|P14618|KPYM_HUMAN	Pyruvate kinase isozymes M1/M2 (EC 2.7.1.40) (Pyruvate kinase muscle isozyme) (Pyruvate kinase 2/3) (Cytosolic thyroid hormone-binding protein) (CTHBP) (THBP1)	CCSGAIIVLTK	2	99
16	spt|P14618|KPYM_HUMAN	Pyruvate kinase isozymes M1/M2 (EC 2.7.1.40) (Pyruvate kinase muscle isozyme) (Pyruvate kinase 2/3) (Cytosolic thyroid hormone-binding protein) (CTHBP) (THBP1)	EAEAAIYHLQLFEELR	9	99
16	spt|P14618|KPYM_HUMAN	Pyruvate kinase isozymes M1/M2 (EC 2.7.1.40) (Pyruvate kinase muscle isozyme) (Pyruvate kinase 2/3) (Cytosolic thyroid hormone-binding protein) (CTHBP) (THBP1)	FGVEQDVDMVFASFIR	7	99
16	spt|P14618|KPYM_HUMAN	Pyruvate kinase isozymes M1/M2 (EC 2.7.1.40) (Pyruvate kinase muscle isozyme) (Pyruvate kinase 2/3) (Cytosolic thyroid hormone-binding protein) (CTHBP) (THBP1)	GADFLVTEVENGGSLGSK	21	99
16	spt|P14618|KPYM_HUMAN	Pyruvate kinase isozymes M1/M2 (EC 2.7.1.40) (Pyruvate kinase muscle isozyme) (Pyruvate kinase 2/3) (Cytosolic thyroid hormone-binding protein) (CTHBP) (THBP1)	GDLGIEIPAEK	18	99
16	spt|P14618|KPYM_HUMAN	Pyruvate kinase isozymes M1/M2 (EC 2.7.1.40) (Pyruvate kinase muscle isozyme) (Pyruvate kinase 2/3) (Cytosolic thyroid hormone-binding protein) (CTHBP) (THBP1)	GDLGIEIPAEKVFLAQK	6	99
16	spt|P14618|KPYM_HUMAN	Pyruvate kinase isozymes M1/M2 (EC 2.7.1.40) (Pyruvate kinase muscle isozyme) (Pyruvate kinase 2/3) (Cytosolic thyroid hormone-binding protein) (CTHBP) (THBP1)	GDYPLEAVR	14	99
16	spt|P14618|KPYM_HUMAN	Pyruvate kinase isozymes M1/M2 (EC 2.7.1.40) (Pyruvate kinase muscle isozyme) (Pyruvate kinase 2/3) (Cytosolic thyroid hormone-binding protein) (CTHBP) (THBP1)	GSGTAEVELK	4	99
16	spt|P14618|KPYM_HUMAN	Pyruvate kinase isozymes M1/M2 (EC 2.7.1.40) (Pyruvate kinase muscle isozyme) (Pyruvate kinase 2/3) (Cytosolic thyroid hormone-binding protein) (CTHBP) (THBP1)	GSGTAEVELKK	1	99
16	spt|P14618|KPYM_HUMAN	Pyruvate kinase isozymes M1/M2 (EC 2.7.1.40) (Pyruvate kinase muscle isozyme) (Pyruvate kinase 2/3) (Cytosolic thyroid hormone-binding protein) (CTHBP) (THBP1)	GVNLPGAAVDLPAVSEK	9	99
16	spt|P14618|KPYM_HUMAN	Pyruvate kinase isozymes M1/M2 (EC 2.7.1.40) (Pyruvate kinase muscle isozyme) (Pyruvate kinase 2/3) (Cytosolic thyroid hormone-binding protein) (CTHBP) (THBP1)	GVNLPGAAVDLPAVSEKDIQDLK	12	99
16	spt|P14618|KPYM_HUMAN	Pyruvate kinase isozymes M1/M2 (EC 2.7.1.40) (Pyruvate kinase muscle isozyme) (Pyruvate kinase 2/3) (Cytosolic thyroid hormone-binding protein) (CTHBP) (THBP1)	ITLDNAYMEK	12	99
16	spt|P14618|KPYM_HUMAN	Pyruvate kinase isozymes M1/M2 (EC 2.7.1.40) (Pyruvate kinase muscle isozyme) (Pyruvate kinase 2/3) (Cytosolic thyroid hormone-binding protein) (CTHBP) (THBP1)	KASDVHEVR	7	99
16	spt|P14618|KPYM_HUMAN	Pyruvate kinase isozymes M1/M2 (EC 2.7.1.40) (Pyruvate kinase muscle isozyme) (Pyruvate kinase 2/3) (Cytosolic thyroid hormone-binding protein) (CTHBP) (THBP1)	KGVNLPGAAVDLPAVSEK	11	99
16	spt|P14618|KPYM_HUMAN	Pyruvate kinase isozymes M1/M2 (EC 2.7.1.40) (Pyruvate kinase muscle isozyme) (Pyruvate kinase 2/3) (Cytosolic thyroid hormone-binding protein) (CTHBP) (THBP1)	LAPITSDPTEATAVGAVEASFK	9	99
16	spt|P14618|KPYM_HUMAN	Pyruvate kinase isozymes M1/M2 (EC 2.7.1.40) (Pyruvate kinase muscle isozyme) (Pyruvate kinase 2/3) (Cytosolic thyroid hormone-binding protein) (CTHBP) (THBP1)	LDIDSPPITAR	21	99
16	spt|P14618|KPYM_HUMAN	Pyruvate kinase isozymes M1/M2 (EC 2.7.1.40) (Pyruvate kinase muscle isozyme) (Pyruvate kinase 2/3) (Cytosolic thyroid hormone-binding protein) (CTHBP) (THBP1)	NTGIICTIGPASR	17	99
16	spt|P14618|KPYM_HUMAN	Pyruvate kinase isozymes M1/M2 (EC 2.7.1.40) (Pyruvate kinase muscle isozyme) (Pyruvate kinase 2/3) (Cytosolic thyroid hormone-binding protein) (CTHBP) (THBP1)	QKGADFLVTEVENGGSLGSK	8	99
16	spt|P14618|KPYM_HUMAN	Pyruvate kinase isozymes M1/M2 (EC 2.7.1.40) (Pyruvate kinase muscle isozyme) (Pyruvate kinase 2/3) (Cytosolic thyroid hormone-binding protein) (CTHBP) (THBP1)	RFDEILEASDGIMVAR	10	99
16	spt|P14618|KPYM_HUMAN	Pyruvate kinase isozymes M1/M2 (EC 2.7.1.40) (Pyruvate kinase muscle isozyme) (Pyruvate kinase 2/3) (Cytosolic thyroid hormone-binding protein) (CTHBP) (THBP1)	SVETLKEMIK	6	99
16	spt|P14618|KPYM_HUMAN	Pyruvate kinase isozymes M1/M2 (EC 2.7.1.40) (Pyruvate kinase muscle isozyme) (Pyruvate kinase 2/3) (Cytosolic thyroid hormone-binding protein) (CTHBP) (THBP1)	TATESFASDPILYRPVAV	4	99
16	spt|P14618|KPYM_HUMAN	Pyruvate kinase isozymes M1/M2 (EC 2.7.1.40) (Pyruvate kinase muscle isozyme) (Pyruvate kinase 2/3) (Cytosolic thyroid hormone-binding protein) (CTHBP) (THBP1)	TATESFASDPILYRPVAVALDTK	11	99
16	spt|P14618|KPYM_HUMAN	Pyruvate kinase isozymes M1/M2 (EC 2.7.1.40) (Pyruvate kinase muscle isozyme) (Pyruvate kinase 2/3) (Cytosolic thyroid hormone-binding protein) (CTHBP) (THBP1)	TATESFASDPILYRPVAVALDTKGPEIR	3	99
16	spt|P14618|KPYM_HUMAN	Pyruvate kinase isozymes M1/M2 (EC 2.7.1.40) (Pyruvate kinase muscle isozyme) (Pyruvate kinase 2/3) (Cytosolic thyroid hormone-binding protein) (CTHBP) (THBP1)	VNFAMNVGK	11	99
16	spt|P14618|KPYM_HUMAN	Pyruvate kinase isozymes M1/M2 (EC 2.7.1.40) (Pyruvate kinase muscle isozyme) (Pyruvate kinase 2/3) (Cytosolic thyroid hormone-binding protein) (CTHBP) (THBP1)	GADFLVTEVENGGSLGSKK	4	98
16	spt|P14618|KPYM_HUMAN	Pyruvate kinase isozymes M1/M2 (EC 2.7.1.40) (Pyruvate kinase muscle isozyme) (Pyruvate kinase 2/3) (Cytosolic thyroid hormone-binding protein) (CTHBP) (THBP1)	MQHLIAR	8	97
16	spt|P14618|KPYM_HUMAN	Pyruvate kinase isozymes M1/M2 (EC 2.7.1.40) (Pyruvate kinase muscle isozyme) (Pyruvate kinase 2/3) (Cytosolic thyroid hormone-binding protein) (CTHBP) (THBP1)	VVEVGSK	6	95
17	trm|Q53FT9|Q53FT9_HUMAN	Enolase 1 variant (Fragment)	AAVPSGASTGIYEALELR	15	99
17	trm|Q53FT9|Q53FT9_HUMAN	Enolase 1 variant (Fragment)	AAVPSGASTGIYEALELRDNDKTR	8	99
17	trm|Q53FT9|Q53FT9_HUMAN	Enolase 1 variant (Fragment)	DATNVGDEGGFAPN	4	99
17	trm|Q53FT9|Q53FT9_HUMAN	Enolase 1 variant (Fragment)	DATNVGDEGGFAPNILENK	10	99
17	trm|Q53FT9|Q53FT9_HUMAN	Enolase 1 variant (Fragment)	DATNVGDEGGFAPNILENKEGLELLK	5	99
17	trm|Q53FT9|Q53FT9_HUMAN	Enolase 1 variant (Fragment)	DYPVVSIEDPFDQDDWGAWQK	6	99
17	trm|Q53FT9|Q53FT9_HUMAN	Enolase 1 variant (Fragment)	FTASAGIQVVGDDLTVTNPK	16	99
17	trm|Q53FT9|Q53FT9_HUMAN	Enolase 1 variant (Fragment)	FTASAGIQVVGDDLTVTNPKR	4	99
17	trm|Q53FT9|Q53FT9_HUMAN	Enolase 1 variant (Fragment)	GNPTVEVDLFTSK	14	99
17	trm|Q53FT9|Q53FT9_HUMAN	Enolase 1 variant (Fragment)	HIADLAGNSEVILPVPAFNVINGGSHAGNK	9	99
17	trm|Q53FT9|Q53FT9_HUMAN	Enolase 1 variant (Fragment)	IDKLMIEMDGTENK	6	99
17	trm|Q53FT9|Q53FT9_HUMAN	Enolase 1 variant (Fragment)	IEEELGSK	13	99
17	trm|Q53FT9|Q53FT9_HUMAN	Enolase 1 variant (Fragment)	IEEELGSKAK	3	99
17	trm|Q53FT9|Q53FT9_HUMAN	Enolase 1 variant (Fragment)	IGAEVYHNLK	7	99
17	trm|Q53FT9|Q53FT9_HUMAN	Enolase 1 variant (Fragment)	KLNVTEQEK	13	99
17	trm|Q53FT9|Q53FT9_HUMAN	Enolase 1 variant (Fragment)	LAMQEFMILPVGAANFR	5	99
17	trm|Q53FT9|Q53FT9_HUMAN	Enolase 1 variant (Fragment)	LAQANGWGVMVSHR	13	99
17	trm|Q53FT9|Q53FT9_HUMAN	Enolase 1 variant (Fragment)	LMIEMDGTENK	7	99
17	trm|Q53FT9|Q53FT9_HUMAN	Enolase 1 variant (Fragment)	NFRNPLAK	7	99
17	trm|Q53FT9|Q53FT9_HUMAN	Enolase 1 variant (Fragment)	SCNCLLLK	5	99
17	trm|Q53FT9|Q53FT9_HUMAN	Enolase 1 variant (Fragment)	SGKYDLDFK	10	99
17	trm|Q53FT9|Q53FT9_HUMAN	Enolase 1 variant (Fragment)	SPDDPSR	2	99
17	trm|Q53FT9|Q53FT9_HUMAN	Enolase 1 variant (Fragment)	TIAPALVSK	16	99
17	trm|Q53FT9|Q53FT9_HUMAN	Enolase 1 variant (Fragment)	TIAPALVSKK	2	99
17	trm|Q53FT9|Q53FT9_HUMAN	Enolase 1 variant (Fragment)	VNQIGSVTESLQACK	15	99
17	trm|Q53FT9|Q53FT9_HUMAN	Enolase 1 variant (Fragment)	VVIGMDVAASEFFR	7	99
17	trm|Q53FT9|Q53FT9_HUMAN	Enolase 1 variant (Fragment)	YISPDQLADLYK	17	99
17	trm|Q53FT9|Q53FT9_HUMAN	Enolase 1 variant (Fragment)	AVEHINK	4	98
17	trm|Q53FT9|Q53FT9_HUMAN	Enolase 1 variant (Fragment)	SGKYDLDFKSPDDPSR	8	98
18	spt|P13667|PDIA4_HUMAN	Protein disulfide-isomerase A4 precursor (EC 5.3.4.1) (Protein ERp-72) (ERp72)	DLGLSESGEDVNAAILDESGK	5	99
18	spt|P13667|PDIA4_HUMAN	Protein disulfide-isomerase A4 precursor (EC 5.3.4.1) (Protein ERp-72) (ERp72)	DLGLSESGEDVNAAILDESGKK	8	99
18	spt|P13667|PDIA4_HUMAN	Protein disulfide-isomerase A4 precursor (EC 5.3.4.1) (Protein ERp-72) (ERp72)	EVSQPDWTPPPEVTLVLTK	5	99
18	spt|P13667|PDIA4_HUMAN	Protein disulfide-isomerase A4 precursor (EC 5.3.4.1) (Protein ERp-72) (ERp72)	FAMEPEEFDSDTLR	7	99
18	spt|P13667|PDIA4_HUMAN	Protein disulfide-isomerase A4 precursor (EC 5.3.4.1) (Protein ERp-72) (ERp72)	FDVSGYPTIK	10	99
18	spt|P13667|PDIA4_HUMAN	Protein disulfide-isomerase A4 precursor (EC 5.3.4.1) (Protein ERp-72) (ERp72)	FDVSGYPTLK	11	99
18	spt|P13667|PDIA4_HUMAN	Protein disulfide-isomerase A4 precursor (EC 5.3.4.1) (Protein ERp-72) (ERp72)	FIEEHATK	4	99
18	spt|P13667|PDIA4_HUMAN	Protein disulfide-isomerase A4 precursor (EC 5.3.4.1) (Protein ERp-72) (ERp72)	GQAVDYEGSR	4	99
18	spt|P13667|PDIA4_HUMAN	Protein disulfide-isomerase A4 precursor (EC 5.3.4.1) (Protein ERp-72) (ERp72)	IDATSASVLASR	14	99
18	spt|P13667|PDIA4_HUMAN	Protein disulfide-isomerase A4 precursor (EC 5.3.4.1) (Protein ERp-72) (ERp72)	KLAPEYEK	3	99
18	spt|P13667|PDIA4_HUMAN	Protein disulfide-isomerase A4 precursor (EC 5.3.4.1) (Protein ERp-72) (ERp72)	MDATANDVPSDR	8	99
18	spt|P13667|PDIA4_HUMAN	Protein disulfide-isomerase A4 precursor (EC 5.3.4.1) (Protein ERp-72) (ERp72)	QLEPVYNSLAK	15	99
18	spt|P13667|PDIA4_HUMAN	Protein disulfide-isomerase A4 precursor (EC 5.3.4.1) (Protein ERp-72) (ERp72)	TQEEIVAK	8	99
18	spt|P13667|PDIA4_HUMAN	Protein disulfide-isomerase A4 precursor (EC 5.3.4.1) (Protein ERp-72) (ERp72)	VDATAETDLAK	11	99
18	spt|P13667|PDIA4_HUMAN	Protein disulfide-isomerase A4 precursor (EC 5.3.4.1) (Protein ERp-72) (ERp72)	VDATAETDLAKR	6	99
18	spt|P13667|PDIA4_HUMAN	Protein disulfide-isomerase A4 precursor (EC 5.3.4.1) (Protein ERp-72) (ERp72)	VEGFPTIYFAPSGDK	5	99
18	spt|P13667|PDIA4_HUMAN	Protein disulfide-isomerase A4 precursor (EC 5.3.4.1) (Protein ERp-72) (ERp72)	YGIVDYMIEQSGPPSK	8	99
18	spt|P13667|PDIA4_HUMAN	Protein disulfide-isomerase A4 precursor (EC 5.3.4.1) (Protein ERp-72) (ERp72)	RSPPIPLAK	6	98
18	spt|P13667|PDIA4_HUMAN	Protein disulfide-isomerase A4 precursor (EC 5.3.4.1) (Protein ERp-72) (ERp72)	RFDVSGYPTLK	9	96
18	spt|P13667|PDIA4_HUMAN	Protein disulfide-isomerase A4 precursor (EC 5.3.4.1) (Protein ERp-72) (ERp72)	VSQGQLVVMQPEK	10	96
19	trm|Q8N6N5|Q8N6N5_HUMAN	"Tubulin, beta 2C "	ALTVPELTQQMFDAK	12	99
19	trm|Q8N6N5|Q8N6N5_HUMAN	"Tubulin, beta 2C "	AVLVDLEPGTMDSVR	12	99
19	trm|Q8N6N5|Q8N6N5_HUMAN	"Tubulin, beta 2C "	EIVHLQAGQCGNQIGAK	7	99
19	trm|Q8N6N5|Q8N6N5_HUMAN	"Tubulin, beta 2C "	EVDEQMLNVQNK	9	99
19	trm|Q8N6N5|Q8N6N5_HUMAN	"Tubulin, beta 2C "	FPGQLNADLR	8	99
19	trm|Q8N6N5|Q8N6N5_HUMAN	"Tubulin, beta 2C "	GHYTEGAELVDSVLDVVR	3	99
19	trm|Q8N6N5|Q8N6N5_HUMAN	"Tubulin, beta 2C "	IMNTFSVVPSPK	8	99
19	trm|Q8N6N5|Q8N6N5_HUMAN	"Tubulin, beta 2C "	INVYYNEATGGK	8	99
19	trm|Q8N6N5|Q8N6N5_HUMAN	"Tubulin, beta 2C "	KLAVNMVPFPR	6	99
19	trm|Q8N6N5|Q8N6N5_HUMAN	"Tubulin, beta 2C "	LAVNMVPFPR	11	99
19	trm|Q8N6N5|Q8N6N5_HUMAN	"Tubulin, beta 2C "	LHFFMPGFAPLTSR	6	99
19	trm|Q8N6N5|Q8N6N5_HUMAN	"Tubulin, beta 2C "	LTTPTYGDLNHLVSATMSGVTTCLR	1	99
19	trm|Q8N6N5|Q8N6N5_HUMAN	"Tubulin, beta 2C "	MSMKEVDEQMLNVQNK	2	99
19	trm|Q8N6N5|Q8N6N5_HUMAN	"Tubulin, beta 2C "	NSSYFVEWIPNNVK	10	99
19	trm|Q8N6N5|Q8N6N5_HUMAN	"Tubulin, beta 2C "	SGPFGQIFRPDNFVFGQSGAGNNWAK	7	99
19	trm|Q8N6N5|Q8N6N5_HUMAN	"Tubulin, beta 2C "	TAVCDIPPR	9	99
19	trm|Q8N6N5|Q8N6N5_HUMAN	"Tubulin, beta 2C "	VDSVLDVVR	4	99
19	trm|Q8N6N5|Q8N6N5_HUMAN	"Tubulin, beta 2C "	YLTVAAVFR	8	99
19	trm|Q8N6N5|Q8N6N5_HUMAN	"Tubulin, beta 2C "	FPGQLNADLRK	3	98
19	trm|Q8N6N5|Q8N6N5_HUMAN	"Tubulin, beta 2C "	PGTMDSVR	7	95
20	trm|Q5U0N8|Q5U0N8_HUMAN	Keratin 18 (Cell proliferation-inducing protein 46)	AQIFANTVDNAR	7	99
20	trm|Q5U0N8|Q5U0N8_HUMAN	Keratin 18 (Cell proliferation-inducing protein 46)	AQYDELAR	6	99
20	trm|Q5U0N8|Q5U0N8_HUMAN	Keratin 18 (Cell proliferation-inducing protein 46)	ASLENSLR	8	99
20	trm|Q5U0N8|Q5U0N8_HUMAN	Keratin 18 (Cell proliferation-inducing protein 46)	ETMQSLNDR	8	99
20	trm|Q5U0N8|Q5U0N8_HUMAN	Keratin 18 (Cell proliferation-inducing protein 46)	IVLQIDNAR	9	99
20	trm|Q5U0N8|Q5U0N8_HUMAN	Keratin 18 (Cell proliferation-inducing protein 46)	LEAEIATYR	2	99
20	trm|Q5U0N8|Q5U0N8_HUMAN	Keratin 18 (Cell proliferation-inducing protein 46)	LLEDGEDFNLGDALDSSNSMQTIQK	3	99
20	trm|Q5U0N8|Q5U0N8_HUMAN	Keratin 18 (Cell proliferation-inducing protein 46)	QAQEYEALLNIK	11	99
20	trm|Q5U0N8|Q5U0N8_HUMAN	Keratin 18 (Cell proliferation-inducing protein 46)	QSVENDIHGLR	9	99
20	trm|Q5U0N8|Q5U0N8_HUMAN	Keratin 18 (Cell proliferation-inducing protein 46)	QSVENDIHGLRK	6	99
20	trm|Q5U0N8|Q5U0N8_HUMAN	Keratin 18 (Cell proliferation-inducing protein 46)	SLGSVQAPSYGAR	8	99
20	trm|Q5U0N8|Q5U0N8_HUMAN	Keratin 18 (Cell proliferation-inducing protein 46)	TVQSLEIDLDSMR	6	99
20	trm|Q5U0N8|Q5U0N8_HUMAN	Keratin 18 (Cell proliferation-inducing protein 46)	VIDDTNITR	8	99
20	trm|Q5U0N8|Q5U0N8_HUMAN	Keratin 18 (Cell proliferation-inducing protein 46)	VKYETELAMR	2	99
20	trm|Q5U0N8|Q5U0N8_HUMAN	Keratin 18 (Cell proliferation-inducing protein 46)	LAADDFR	6	95
21	trm|Q5I6Y6|Q5I6Y6_HUMAN	Lamin A/C transcript variant 1	AAYEAELGDAR	5	99
21	trm|Q5I6Y6|Q5I6Y6_HUMAN	Lamin A/C transcript variant 1	EGDLIAAQAR	3	99
21	trm|Q5I6Y6|Q5I6Y6_HUMAN	Lamin A/C transcript variant 1	IDSLSAQLSQLQK	4	99
21	trm|Q5I6Y6|Q5I6Y6_HUMAN	Lamin A/C transcript variant 1	ITESEEVVSR	5	99
21	trm|Q5I6Y6|Q5I6Y6_HUMAN	Lamin A/C transcript variant 1	LADALQELR	6	99
21	trm|Q5I6Y6|Q5I6Y6_HUMAN	Lamin A/C transcript variant 1	LQEKEDLQELNDR	2	99
21	trm|Q5I6Y6|Q5I6Y6_HUMAN	Lamin A/C transcript variant 1	LSPSPTSQR	2	99
21	trm|Q5I6Y6|Q5I6Y6_HUMAN	Lamin A/C transcript variant 1	NIYSEELR	2	99
21	trm|Q5I6Y6|Q5I6Y6_HUMAN	Lamin A/C transcript variant 1	SLETENAGLR	2	99
21	trm|Q5I6Y6|Q5I6Y6_HUMAN	Lamin A/C transcript variant 1	SVGGSGGGSFGDNLVTR	5	99
21	trm|Q5I6Y6|Q5I6Y6_HUMAN	Lamin A/C transcript variant 1	TALINSTGEEVAMR	4	99
21	trm|Q5I6Y6|Q5I6Y6_HUMAN	Lamin A/C transcript variant 1	VAVEEVDEEGKFVR	1	99
21	trm|Q5I6Y6|Q5I6Y6_HUMAN	Lamin A/C transcript variant 1	LAVYIDR	2	96
22	trm|Q5DSM0|Q5DSM0_HUMAN	Growth-inhibiting protein 12	CLAENAGDVAFVK	1	99
22	trm|Q5DSM0|Q5DSM0_HUMAN	Growth-inhibiting protein 12	DGAGDVAFIR	1	99
22	trm|Q5DSM0|Q5DSM0_HUMAN	Growth-inhibiting protein 12	DSAIGFSR	1	99
22	trm|Q5DSM0|Q5DSM0_HUMAN	Growth-inhibiting protein 12	DSPIQCIQAIAENR	1	99
22	trm|Q5DSM0|Q5DSM0_HUMAN	Growth-inhibiting protein 12	ESTVFEDLSDEAERDEYELLCPDNTR	1	99
22	trm|Q5DSM0|Q5DSM0_HUMAN	Growth-inhibiting protein 12	NLLFNDNTECLAR	1	99
22	trm|Q5DSM0|Q5DSM0_HUMAN	Growth-inhibiting protein 12	YLGPQYVAGITNLK	1	99
22	trm|Q5DSM0|Q5DSM0_HUMAN	Growth-inhibiting protein 12	YYGYTGAFR	1	99
22	trm|Q5DSM0|Q5DSM0_HUMAN	Growth-inhibiting protein 12	CGLVPVLAENYK	1	97
22	trm|Q5DSM0|Q5DSM0_HUMAN	Growth-inhibiting protein 12	SVQWCAVSQPEATK	1	97
23	trm|Q6PJA4|Q6PJA4_HUMAN	IGHG1 protein	AEDTAVYYCAR	1	99
23	trm|Q6PJA4|Q6PJA4_HUMAN	IGHG1 protein	ALPAPIEK	1	99
23	trm|Q6PJA4|Q6PJA4_HUMAN	IGHG1 protein	EPQVYTLPPSR	1	99
23	trm|Q6PJA4|Q6PJA4_HUMAN	IGHG1 protein	EVQLVESGGGLVQPGGSLR	1	99
23	trm|Q6PJA4|Q6PJA4_HUMAN	IGHG1 protein	GFYPSDIAVEWESNGQPENNYK	1	99
23	trm|Q6PJA4|Q6PJA4_HUMAN	IGHG1 protein	GPSVFPLAPSSK	1	99
23	trm|Q6PJA4|Q6PJA4_HUMAN	IGHG1 protein	STSGGTAALGCLVK	1	99
23	trm|Q6PJA4|Q6PJA4_HUMAN	IGHG1 protein	TTPPVLDSDGSFFLYSK	1	99
23	trm|Q6PJA4|Q6PJA4_HUMAN	IGHG1 protein	SVFPLAPSSK	1	98
24	spt|Q01995|TAGL_HUMAN	Transgelin (Smooth muscle protein 22-alpha) (SM22-alpha) (WS3-10) (22 kDa actin-binding protein)	AAEDYGVIK	2	99
24	spt|Q01995|TAGL_HUMAN	Transgelin (Smooth muscle protein 22-alpha) (SM22-alpha) (WS3-10) (22 kDa actin-binding protein)	ANKGPSYGMSR	5	99
24	spt|Q01995|TAGL_HUMAN	Transgelin (Smooth muscle protein 22-alpha) (SM22-alpha) (WS3-10) (22 kDa actin-binding protein)	EFTESQLQEGK	6	99
24	spt|Q01995|TAGL_HUMAN	Transgelin (Smooth muscle protein 22-alpha) (SM22-alpha) (WS3-10) (22 kDa actin-binding protein)	GASQAGMTGYGR	1	99
24	spt|Q01995|TAGL_HUMAN	Transgelin (Smooth muscle protein 22-alpha) (SM22-alpha) (WS3-10) (22 kDa actin-binding protein)	GASQAGMTGYGRPR	5	99
24	spt|Q01995|TAGL_HUMAN	Transgelin (Smooth muscle protein 22-alpha) (SM22-alpha) (WS3-10) (22 kDa actin-binding protein)	GDPNWFMK	4	99
24	spt|Q01995|TAGL_HUMAN	Transgelin (Smooth muscle protein 22-alpha) (SM22-alpha) (WS3-10) (22 kDa actin-binding protein)	HVIGLQMGSN	3	99
24	spt|Q01995|TAGL_HUMAN	Transgelin (Smooth muscle protein 22-alpha) (SM22-alpha) (WS3-10) (22 kDa actin-binding protein)	HVIGLQMGSNR	3	99
24	spt|Q01995|TAGL_HUMAN	Transgelin (Smooth muscle protein 22-alpha) (SM22-alpha) (WS3-10) (22 kDa actin-binding protein)	KYDEELEER	4	99
24	spt|Q01995|TAGL_HUMAN	Transgelin (Smooth muscle protein 22-alpha) (SM22-alpha) (WS3-10) (22 kDa actin-binding protein)	QMEQVAQFLK	6	99
24	spt|Q01995|TAGL_HUMAN	Transgelin (Smooth muscle protein 22-alpha) (SM22-alpha) (WS3-10) (22 kDa actin-binding protein)	TDMFQTVDLFEGK	2	99
24	spt|Q01995|TAGL_HUMAN	Transgelin (Smooth muscle protein 22-alpha) (SM22-alpha) (WS3-10) (22 kDa actin-binding protein)	TLMALGSLAVTK	4	99
24	spt|Q01995|TAGL_HUMAN	Transgelin (Smooth muscle protein 22-alpha) (SM22-alpha) (WS3-10) (22 kDa actin-binding protein)	VPENPPSMVFK	4	99
24	spt|Q01995|TAGL_HUMAN	Transgelin (Smooth muscle protein 22-alpha) (SM22-alpha) (WS3-10) (22 kDa actin-binding protein)	YDEELEER	2	99
24	spt|Q01995|TAGL_HUMAN	Transgelin (Smooth muscle protein 22-alpha) (SM22-alpha) (WS3-10) (22 kDa actin-binding protein)	EFTESQLQEGKHVIGLQ	1	98
25	trm|Q8N473|Q8N473_HUMAN	"Collagen, type I, alpha 1 "	DGEAGAQGPPGPAGPAGER	9	99
25	trm|Q8N473|Q8N473_HUMAN	"Collagen, type I, alpha 1 "	DGLNGLPGPIGPPGPR	10	99
25	trm|Q8N473|Q8N473_HUMAN	"Collagen, type I, alpha 1 "	GAAGEPGKAGER	1	99
25	trm|Q8N473|Q8N473_HUMAN	"Collagen, type I, alpha 1 "	GADGSPGKDGVR	6	99
25	trm|Q8N473|Q8N473_HUMAN	"Collagen, type I, alpha 1 "	GANGAPGIAGAPGFPGAR	13	99
25	trm|Q8N473|Q8N473_HUMAN	"Collagen, type I, alpha 1 "	GARGEPGPTGLPGPPGER	7	99
25	trm|Q8N473|Q8N473_HUMAN	"Collagen, type I, alpha 1 "	GDAGAPGAPGSQGAPGLQGMPGER	10	99
25	trm|Q8N473|Q8N473_HUMAN	"Collagen, type I, alpha 1 "	GDAGPAGPKGEPGSPGENGAPGQMGPR	5	99
25	trm|Q8N473|Q8N473_HUMAN	"Collagen, type I, alpha 1 "	GDAGPPGPAGPAGPPGPIGNVGAPGAKGAR	8	99
25	trm|Q8N473|Q8N473_HUMAN	"Collagen, type I, alpha 1 "	GDRGETGPAGPPGAPGAPGAPGPVGPAGK	5	99
25	trm|Q8N473|Q8N473_HUMAN	"Collagen, type I, alpha 1 "	GEPGPPGPAGAAGPAGNPGADGQPGAK	9	99
25	trm|Q8N473|Q8N473_HUMAN	"Collagen, type I, alpha 1 "	GEPGPTGLPGPPGER	10	99
25	trm|Q8N473|Q8N473_HUMAN	"Collagen, type I, alpha 1 "	GEPGPVGVQGPPGPAGEEGKR	2	99
25	trm|Q8N473|Q8N473_HUMAN	"Collagen, type I, alpha 1 "	GETGPAGPAGPVGPVGAR	11	99
25	trm|Q8N473|Q8N473_HUMAN	"Collagen, type I, alpha 1 "	GETGPAGPPGAPGAPGAPGPVGPAGK	6	99
25	trm|Q8N473|Q8N473_HUMAN	"Collagen, type I, alpha 1 "	GETGPAGRPGEVGPPGPPGPAGEK	8	99
25	trm|Q8N473|Q8N473_HUMAN	"Collagen, type I, alpha 1 "	GFPGADGVAGPK	8	99
25	trm|Q8N473|Q8N473_HUMAN	"Collagen, type I, alpha 1 "	GFSGLDGAK	8	99
25	trm|Q8N473|Q8N473_HUMAN	"Collagen, type I, alpha 1 "	GFSGLQGPPGPPGSPGEQGPSGASGPAGPR	9	99
25	trm|Q8N473|Q8N473_HUMAN	"Collagen, type I, alpha 1 "	GLTGPIGPPGPAGAPGDKGESGPSGPAGPTGAR	7	99
25	trm|Q8N473|Q8N473_HUMAN	"Collagen, type I, alpha 1 "	GLTGSPGSPGPDGK	9	99
25	trm|Q8N473|Q8N473_HUMAN	"Collagen, type I, alpha 1 "	GPAGPQGPR	4	99
25	trm|Q8N473|Q8N473_HUMAN	"Collagen, type I, alpha 1 "	GPAGPQGPRGDKGETGEQGDR	7	99
25	trm|Q8N473|Q8N473_HUMAN	"Collagen, type I, alpha 1 "	GPPGPMGPPGLAGPPGESGR	7	99
25	trm|Q8N473|Q8N473_HUMAN	"Collagen, type I, alpha 1 "	GPPGSAGAPGKDGLNGLPGPIGPPGPR	6	99
25	trm|Q8N473|Q8N473_HUMAN	"Collagen, type I, alpha 1 "	GPSGPQGPGGPPGPK	10	99
25	trm|Q8N473|Q8N473_HUMAN	"Collagen, type I, alpha 1 "	GRPGAPGPAGAR	9	99
25	trm|Q8N473|Q8N473_HUMAN	"Collagen, type I, alpha 1 "	GSAGPPGATGFPGAAGR	10	99
25	trm|Q8N473|Q8N473_HUMAN	"Collagen, type I, alpha 1 "	GSPGADGPAGAPGT	5	99
25	trm|Q8N473|Q8N473_HUMAN	"Collagen, type I, alpha 1 "	GSPGADGPAGAPGTPGPQGIAGQR	8	99
25	trm|Q8N473|Q8N473_HUMAN	"Collagen, type I, alpha 1 "	GSPGEAGRPGEAGLPGAK	10	99
25	trm|Q8N473|Q8N473_HUMAN	"Collagen, type I, alpha 1 "	GVPGPPGAVGPAGK	2	99
25	trm|Q8N473|Q8N473_HUMAN	"Collagen, type I, alpha 1 "	GVPGPPGAVGPAGKDGEAGAQGPPGPAGPAGER	3	99
25	trm|Q8N473|Q8N473_HUMAN	"Collagen, type I, alpha 1 "	GVQGPPGPAGPR	12	99
25	trm|Q8N473|Q8N473_HUMAN	"Collagen, type I, alpha 1 "	PGEVGPPGPPGPAGEK	3	99
25	trm|Q8N473|Q8N473_HUMAN	"Collagen, type I, alpha 1 "	SGDRGETGPAGPAGPVGPVGAR	9	99
25	trm|Q8N473|Q8N473_HUMAN	"Collagen, type I, alpha 1 "	STGGISVPGPMGPSGPR	13	99
25	trm|Q8N473|Q8N473_HUMAN	"Collagen, type I, alpha 1 "	TGPAGPAGPVGPVGAR	1	99
25	trm|Q8N473|Q8N473_HUMAN	"Collagen, type I, alpha 1 "	TGPPGPAGQDGRPGPPGPPGAR	10	99
25	trm|Q8N473|Q8N473_HUMAN	"Collagen, type I, alpha 1 "	VGPPGPSGNAGPPGPPGPAGK	11	99
25	trm|Q8N473|Q8N473_HUMAN	"Collagen, type I, alpha 1 "	GAAGLPGPKGDRGDAGPK	9	98
25	trm|Q8N473|Q8N473_HUMAN	"Collagen, type I, alpha 1 "	GEPGPVGVQGPPGPAGEEGK	7	98
25	trm|Q8N473|Q8N473_HUMAN	"Collagen, type I, alpha 1 "	GERGAAGLPGPK	1	98
25	trm|Q8N473|Q8N473_HUMAN	"Collagen, type I, alpha 1 "	GPAGPAGPVGPVGAR	1	98
25	trm|Q8N473|Q8N473_HUMAN	"Collagen, type I, alpha 1 "	GVVGLPGQR	4	98
25	trm|Q8N473|Q8N473_HUMAN	"Collagen, type I, alpha 1 "	GVVGLPGQRGER	5	98
25	trm|Q8N473|Q8N473_HUMAN	"Collagen, type I, alpha 1 "	GSEGPQGVRGEPGPPGPAGAAGPAGNPGADGQPGAK	6	96
26	spt|P30101|PDIA3_HUMAN	Protein disulfide-isomerase A3 precursor (EC 5.3.4.1) (Disulfide isomerase ER-60) (ERp60) (58 kDa microsomal protein) (p58) (ERp57) (58 kDa glucose-regulated protein)	DASIVGFFDDSFSEAHSEFLK	2	99
26	spt|P30101|PDIA3_HUMAN	Protein disulfide-isomerase A3 precursor (EC 5.3.4.1) (Disulfide isomerase ER-60) (ERp60) (58 kDa microsomal protein) (p58) (ERp57) (58 kDa glucose-regulated protein)	DGEEAGAYDGPR	10	99
26	spt|P30101|PDIA3_HUMAN	Protein disulfide-isomerase A3 precursor (EC 5.3.4.1) (Disulfide isomerase ER-60) (ERp60) (58 kDa microsomal protein) (p58) (ERp57) (58 kDa glucose-regulated protein)	DLLIAYYDVDYEK	4	99
26	spt|P30101|PDIA3_HUMAN	Protein disulfide-isomerase A3 precursor (EC 5.3.4.1) (Disulfide isomerase ER-60) (ERp60) (58 kDa microsomal protein) (p58) (ERp57) (58 kDa glucose-regulated protein)	EATNPPVIQEEKPK	13	99
26	spt|P30101|PDIA3_HUMAN	Protein disulfide-isomerase A3 precursor (EC 5.3.4.1) (Disulfide isomerase ER-60) (ERp60) (58 kDa microsomal protein) (p58) (ERp57) (58 kDa glucose-regulated protein)	ELSDFISYLQR	14	99
26	spt|P30101|PDIA3_HUMAN	Protein disulfide-isomerase A3 precursor (EC 5.3.4.1) (Disulfide isomerase ER-60) (ERp60) (58 kDa microsomal protein) (p58) (ERp57) (58 kDa glucose-regulated protein)	FIQENIFGICPHMTEDNKDLIQGK	5	99
26	spt|P30101|PDIA3_HUMAN	Protein disulfide-isomerase A3 precursor (EC 5.3.4.1) (Disulfide isomerase ER-60) (ERp60) (58 kDa microsomal protein) (p58) (ERp57) (58 kDa glucose-regulated protein)	FLQDYFDGNLK	8	99
26	spt|P30101|PDIA3_HUMAN	Protein disulfide-isomerase A3 precursor (EC 5.3.4.1) (Disulfide isomerase ER-60) (ERp60) (58 kDa microsomal protein) (p58) (ERp57) (58 kDa glucose-regulated protein)	FLQDYFDGNLKR	10	99
26	spt|P30101|PDIA3_HUMAN	Protein disulfide-isomerase A3 precursor (EC 5.3.4.1) (Disulfide isomerase ER-60) (ERp60) (58 kDa microsomal protein) (p58) (ERp57) (58 kDa glucose-regulated protein)	FVMQEEFSR	16	99
26	spt|P30101|PDIA3_HUMAN	Protein disulfide-isomerase A3 precursor (EC 5.3.4.1) (Disulfide isomerase ER-60) (ERp60) (58 kDa microsomal protein) (p58) (ERp57) (58 kDa glucose-regulated protein)	GFPTIYFSPANK	20	99
26	spt|P30101|PDIA3_HUMAN	Protein disulfide-isomerase A3 precursor (EC 5.3.4.1) (Disulfide isomerase ER-60) (ERp60) (58 kDa microsomal protein) (p58) (ERp57) (58 kDa glucose-regulated protein)	GVALLLAAARLAAASDVLELTDDNFESR	7	99
26	spt|P30101|PDIA3_HUMAN	Protein disulfide-isomerase A3 precursor (EC 5.3.4.1) (Disulfide isomerase ER-60) (ERp60) (58 kDa microsomal protein) (p58) (ERp57) (58 kDa glucose-regulated protein)	IFRDGEEAGAYDGPR	14	99
26	spt|P30101|PDIA3_HUMAN	Protein disulfide-isomerase A3 precursor (EC 5.3.4.1) (Disulfide isomerase ER-60) (ERp60) (58 kDa microsomal protein) (p58) (ERp57) (58 kDa glucose-regulated protein)	ISDTGSAGLMLVEFF	1	99
26	spt|P30101|PDIA3_HUMAN	Protein disulfide-isomerase A3 precursor (EC 5.3.4.1) (Disulfide isomerase ER-60) (ERp60) (58 kDa microsomal protein) (p58) (ERp57) (58 kDa glucose-regulated protein)	LAPEYEAAATR	17	99
26	spt|P30101|PDIA3_HUMAN	Protein disulfide-isomerase A3 precursor (EC 5.3.4.1) (Disulfide isomerase ER-60) (ERp60) (58 kDa microsomal protein) (p58) (ERp57) (58 kDa glucose-regulated protein)	LKGIVPLAK	2	99
26	spt|P30101|PDIA3_HUMAN	Protein disulfide-isomerase A3 precursor (EC 5.3.4.1) (Disulfide isomerase ER-60) (ERp60) (58 kDa microsomal protein) (p58) (ERp57) (58 kDa glucose-regulated protein)	LNFAVASR	10	99
26	spt|P30101|PDIA3_HUMAN	Protein disulfide-isomerase A3 precursor (EC 5.3.4.1) (Disulfide isomerase ER-60) (ERp60) (58 kDa microsomal protein) (p58) (ERp57) (58 kDa glucose-regulated protein)	LSKDPNIVIAK	15	99
26	spt|P30101|PDIA3_HUMAN	Protein disulfide-isomerase A3 precursor (EC 5.3.4.1) (Disulfide isomerase ER-60) (ERp60) (58 kDa microsomal protein) (p58) (ERp57) (58 kDa glucose-regulated protein)	MDATANDVPSPYEVR	16	99
26	spt|P30101|PDIA3_HUMAN	Protein disulfide-isomerase A3 precursor (EC 5.3.4.1) (Disulfide isomerase ER-60) (ERp60) (58 kDa microsomal protein) (p58) (ERp57) (58 kDa glucose-regulated protein)	QAGPASVPLR	11	99
26	spt|P30101|PDIA3_HUMAN	Protein disulfide-isomerase A3 precursor (EC 5.3.4.1) (Disulfide isomerase ER-60) (ERp60) (58 kDa microsomal protein) (p58) (ERp57) (58 kDa glucose-regulated protein)	QAGPASVPLRTEEEFKK	11	99
26	spt|P30101|PDIA3_HUMAN	Protein disulfide-isomerase A3 precursor (EC 5.3.4.1) (Disulfide isomerase ER-60) (ERp60) (58 kDa microsomal protein) (p58) (ERp57) (58 kDa glucose-regulated protein)	RLAPEYEAAATR	9	99
26	spt|P30101|PDIA3_HUMAN	Protein disulfide-isomerase A3 precursor (EC 5.3.4.1) (Disulfide isomerase ER-60) (ERp60) (58 kDa microsomal protein) (p58) (ERp57) (58 kDa glucose-regulated protein)	SDVLELTDDNFESR	19	99
26	spt|P30101|PDIA3_HUMAN	Protein disulfide-isomerase A3 precursor (EC 5.3.4.1) (Disulfide isomerase ER-60) (ERp60) (58 kDa microsomal protein) (p58) (ERp57) (58 kDa glucose-regulated protein)	SEPIPESNDGPVK	14	99
26	spt|P30101|PDIA3_HUMAN	Protein disulfide-isomerase A3 precursor (EC 5.3.4.1) (Disulfide isomerase ER-60) (ERp60) (58 kDa microsomal protein) (p58) (ERp57) (58 kDa glucose-regulated protein)	TADGIVSHLK	9	99
26	spt|P30101|PDIA3_HUMAN	Protein disulfide-isomerase A3 precursor (EC 5.3.4.1) (Disulfide isomerase ER-60) (ERp60) (58 kDa microsomal protein) (p58) (ERp57) (58 kDa glucose-regulated protein)	TADGIVSHLKK	5	99
26	spt|P30101|PDIA3_HUMAN	Protein disulfide-isomerase A3 precursor (EC 5.3.4.1) (Disulfide isomerase ER-60) (ERp60) (58 kDa microsomal protein) (p58) (ERp57) (58 kDa glucose-regulated protein)	TFSHELSDFGLESTAGEIPVVAIR	4	99
26	spt|P30101|PDIA3_HUMAN	Protein disulfide-isomerase A3 precursor (EC 5.3.4.1) (Disulfide isomerase ER-60) (ERp60) (58 kDa microsomal protein) (p58) (ERp57) (58 kDa glucose-regulated protein)	YGVSGYPTLK	7	99
26	spt|P30101|PDIA3_HUMAN	Protein disulfide-isomerase A3 precursor (EC 5.3.4.1) (Disulfide isomerase ER-60) (ERp60) (58 kDa microsomal protein) (p58) (ERp57) (58 kDa glucose-regulated protein)	GFPTIYFSPANKK	3	98
26	spt|P30101|PDIA3_HUMAN	Protein disulfide-isomerase A3 precursor (EC 5.3.4.1) (Disulfide isomerase ER-60) (ERp60) (58 kDa microsomal protein) (p58) (ERp57) (58 kDa glucose-regulated protein)	VDCTANTNTCNK	6	97
27	trm|Q6FHZ0|Q6FHZ0_HUMAN	MDH2 protein	AGAGSATLSMAYAGAR	15	99
27	trm|Q6FHZ0|Q6FHZ0_HUMAN	MDH2 protein	ANTFVAELK	5	99
27	trm|Q6FHZ0|Q6FHZ0_HUMAN	MDH2 protein	FVFSLVDAMNGK	6	99
27	trm|Q6FHZ0|Q6FHZ0_HUMAN	MDH2 protein	GCDVVVIPAGVPR	11	99
27	trm|Q6FHZ0|Q6FHZ0_HUMAN	MDH2 protein	GYLGPEQLPDCLK	13	99
27	trm|Q6FHZ0|Q6FHZ0_HUMAN	MDH2 protein	IFGVTTLDIVR	11	99
27	trm|Q6FHZ0|Q6FHZ0_HUMAN	MDH2 protein	IQEAGTEVVK	8	99
27	trm|Q6FHZ0|Q6FHZ0_HUMAN	MDH2 protein	LTLYDIAHTPGVAADLSHIETK	7	99
27	trm|Q6FHZ0|Q6FHZ0_HUMAN	MDH2 protein	MISDAIPELK	12	99
27	trm|Q6FHZ0|Q6FHZ0_HUMAN	MDH2 protein	SQETECTYFSTPLLLGK	10	99
27	trm|Q6FHZ0|Q6FHZ0_HUMAN	MDH2 protein	TIIPLISQCTPK	13	99
27	trm|Q6FHZ0|Q6FHZ0_HUMAN	MDH2 protein	VAVLGASGGIGQPLSLLLK	11	99
27	trm|Q6FHZ0|Q6FHZ0_HUMAN	MDH2 protein	VDFPQDQLTALTGR	21	99
27	trm|Q6FHZ0|Q6FHZ0_HUMAN	MDH2 protein	VNVPVIGGHAGK	13	99
27	trm|Q6FHZ0|Q6FHZ0_HUMAN	MDH2 protein	VSSFEEK	6	98
28	spt|P11142|HSP7C_HUMAN	Heat shock cognate 71 kDa protein (Heat shock 70 kDa protein 8)	ARFEELNADLFR	6	99
28	spt|P11142|HSP7C_HUMAN	Heat shock cognate 71 kDa protein (Heat shock 70 kDa protein 8)	CNEIINWLDK	4	99
28	spt|P11142|HSP7C_HUMAN	Heat shock cognate 71 kDa protein (Heat shock 70 kDa protein 8)	DAGTIAGLNVLR	16	99
28	spt|P11142|HSP7C_HUMAN	Heat shock cognate 71 kDa protein (Heat shock 70 kDa protein 8)	FEELNADLFR	12	99
28	spt|P11142|HSP7C_HUMAN	Heat shock cognate 71 kDa protein (Heat shock 70 kDa protein 8)	FELTGIPPAPR	9	99
28	spt|P11142|HSP7C_HUMAN	Heat shock cognate 71 kDa protein (Heat shock 70 kDa protein 8)	GPAVGIDLGTTY	6	99
28	spt|P11142|HSP7C_HUMAN	Heat shock cognate 71 kDa protein (Heat shock 70 kDa protein 8)	GTLDPVEK	6	99
28	spt|P11142|HSP7C_HUMAN	Heat shock cognate 71 kDa protein (Heat shock 70 kDa protein 8)	IINEPTAAAIAYGLDK	14	99
28	spt|P11142|HSP7C_HUMAN	Heat shock cognate 71 kDa protein (Heat shock 70 kDa protein 8)	IINEPTAAAIAYGLDKK	11	99
28	spt|P11142|HSP7C_HUMAN	Heat shock cognate 71 kDa protein (Heat shock 70 kDa protein 8)	ITITNDKGR	4	99
28	spt|P11142|HSP7C_HUMAN	Heat shock cognate 71 kDa protein (Heat shock 70 kDa protein 8)	LDKSQIHDIVLVGGSTR	2	99
28	spt|P11142|HSP7C_HUMAN	Heat shock cognate 71 kDa protein (Heat shock 70 kDa protein 8)	LLQDFFNGK	10	99
28	spt|P11142|HSP7C_HUMAN	Heat shock cognate 71 kDa protein (Heat shock 70 kDa protein 8)	LLQDFFNGKELNK	3	99
28	spt|P11142|HSP7C_HUMAN	Heat shock cognate 71 kDa protein (Heat shock 70 kDa protein 8)	LSKEDIER	10	99
28	spt|P11142|HSP7C_HUMAN	Heat shock cognate 71 kDa protein (Heat shock 70 kDa protein 8)	MKEIAEAYLGK	7	99
28	spt|P11142|HSP7C_HUMAN	Heat shock cognate 71 kDa protein (Heat shock 70 kDa protein 8)	MVNHFIAEFK	9	99
28	spt|P11142|HSP7C_HUMAN	Heat shock cognate 71 kDa protein (Heat shock 70 kDa protein 8)	NQTAEKEEFEHQQK	3	99
28	spt|P11142|HSP7C_HUMAN	Heat shock cognate 71 kDa protein (Heat shock 70 kDa protein 8)	NQVAMNPTNTVFDAK	14	99
28	spt|P11142|HSP7C_HUMAN	Heat shock cognate 71 kDa protein (Heat shock 70 kDa protein 8)	NQVAMNPTNTVFDAKR	9	99
28	spt|P11142|HSP7C_HUMAN	Heat shock cognate 71 kDa protein (Heat shock 70 kDa protein 8)	NSLESYAFNMK	10	99
28	spt|P11142|HSP7C_HUMAN	Heat shock cognate 71 kDa protein (Heat shock 70 kDa protein 8)	QATKDAGTIAGLNVLR	10	99
28	spt|P11142|HSP7C_HUMAN	Heat shock cognate 71 kDa protein (Heat shock 70 kDa protein 8)	QTQTFTTYSDNQPGVLIQVYEGER	10	99
28	spt|P11142|HSP7C_HUMAN	Heat shock cognate 71 kDa protein (Heat shock 70 kDa protein 8)	SCVGVFQHGK	3	99
28	spt|P11142|HSP7C_HUMAN	Heat shock cognate 71 kDa protein (Heat shock 70 kDa protein 8)	SFYPEEVSSMVLTK	7	99
28	spt|P11142|HSP7C_HUMAN	Heat shock cognate 71 kDa protein (Heat shock 70 kDa protein 8)	SINPDEAVAYGAAVQAAILSGDK	11	99
28	spt|P11142|HSP7C_HUMAN	Heat shock cognate 71 kDa protein (Heat shock 70 kDa protein 8)	SQIHDIVLVGGSTR	8	99
28	spt|P11142|HSP7C_HUMAN	Heat shock cognate 71 kDa protein (Heat shock 70 kDa protein 8)	STAGDTHLGGED	1	99
28	spt|P11142|HSP7C_HUMAN	Heat shock cognate 71 kDa protein (Heat shock 70 kDa protein 8)	STAGDTHLGGEDFDNR	12	99
28	spt|P11142|HSP7C_HUMAN	Heat shock cognate 71 kDa protein (Heat shock 70 kDa protein 8)	TTPSYVAFTDTER	16	99
28	spt|P11142|HSP7C_HUMAN	Heat shock cognate 71 kDa protein (Heat shock 70 kDa protein 8)	TVTNAVVTVPAYFNDSQR	12	99
28	spt|P11142|HSP7C_HUMAN	Heat shock cognate 71 kDa protein (Heat shock 70 kDa protein 8)	VCNPIITK	10	99
28	spt|P11142|HSP7C_HUMAN	Heat shock cognate 71 kDa protein (Heat shock 70 kDa protein 8)	VEIIANDQGNR	15	99
28	spt|P11142|HSP7C_HUMAN	Heat shock cognate 71 kDa protein (Heat shock 70 kDa protein 8)	VQVEYKGETK	8	99
28	spt|P11142|HSP7C_HUMAN	Heat shock cognate 71 kDa protein (Heat shock 70 kDa protein 8)	EIAEAYLGK	3	98
28	spt|P11142|HSP7C_HUMAN	Heat shock cognate 71 kDa protein (Heat shock 70 kDa protein 8)	HWPFMVVNDAGRPK	5	98
28	spt|P11142|HSP7C_HUMAN	Heat shock cognate 71 kDa protein (Heat shock 70 kDa protein 8)	LIGDAAK	11	98
28	spt|P11142|HSP7C_HUMAN	Heat shock cognate 71 kDa protein (Heat shock 70 kDa protein 8)	RFDDAVVQSDMK	7	96
29	spt|P06396|GELS_HUMAN	Gelsolin precursor (Actin-depolymerizing factor) (ADF) (Brevin) (AGEL)	AGALNSNDAFVLK	16	99
29	spt|P06396|GELS_HUMAN	Gelsolin precursor (Actin-depolymerizing factor) (ADF) (Brevin) (AGEL)	AQPVQVAEGSEPDGFWEALGGK	16	99
29	spt|P06396|GELS_HUMAN	Gelsolin precursor (Actin-depolymerizing factor) (ADF) (Brevin) (AGEL)	DSQEEEKTEALTSAK	4	99
29	spt|P06396|GELS_HUMAN	Gelsolin precursor (Actin-depolymerizing factor) (ADF) (Brevin) (AGEL)	EGGQTAPASTR	14	99
29	spt|P06396|GELS_HUMAN	Gelsolin precursor (Actin-depolymerizing factor) (ADF) (Brevin) (AGEL)	EVQGFESATFLGYFK	5	99
29	spt|P06396|GELS_HUMAN	Gelsolin precursor (Actin-depolymerizing factor) (ADF) (Brevin) (AGEL)	GASQAGAPQGR	8	99
29	spt|P06396|GELS_HUMAN	Gelsolin precursor (Actin-depolymerizing factor) (ADF) (Brevin) (AGEL)	HVVPNEVVVQR	9	99
29	spt|P06396|GELS_HUMAN	Gelsolin precursor (Actin-depolymerizing factor) (ADF) (Brevin) (AGEL)	KGGVASGFK	2	99
29	spt|P06396|GELS_HUMAN	Gelsolin precursor (Actin-depolymerizing factor) (ADF) (Brevin) (AGEL)	LKATQVSK	7	99
29	spt|P06396|GELS_HUMAN	Gelsolin precursor (Actin-depolymerizing factor) (ADF) (Brevin) (AGEL)	NWRDPDQTDGLGLSYLSSHIANVER	2	99
29	spt|P06396|GELS_HUMAN	Gelsolin precursor (Actin-depolymerizing factor) (ADF) (Brevin) (AGEL)	QTQVSVLPEGGETPLFK	7	99
29	spt|P06396|GELS_HUMAN	Gelsolin precursor (Actin-depolymerizing factor) (ADF) (Brevin) (AGEL)	SEDCFILDHGK	5	99
29	spt|P06396|GELS_HUMAN	Gelsolin precursor (Actin-depolymerizing factor) (ADF) (Brevin) (AGEL)	SLVADENPFAQGALK	1	99
29	spt|P06396|GELS_HUMAN	Gelsolin precursor (Actin-depolymerizing factor) (ADF) (Brevin) (AGEL)	TASDFITK	12	99
29	spt|P06396|GELS_HUMAN	Gelsolin precursor (Actin-depolymerizing factor) (ADF) (Brevin) (AGEL)	TGAQELLR	12	99
29	spt|P06396|GELS_HUMAN	Gelsolin precursor (Actin-depolymerizing factor) (ADF) (Brevin) (AGEL)	TPSAAYLWVGTGASEAEK	13	99
29	spt|P06396|GELS_HUMAN	Gelsolin precursor (Actin-depolymerizing factor) (ADF) (Brevin) (AGEL)	VSNGAGTMSVSLVADENPFAQGALK	11	99
29	spt|P06396|GELS_HUMAN	Gelsolin precursor (Actin-depolymerizing factor) (ADF) (Brevin) (AGEL)	VVEHPEFLK	13	99
29	spt|P06396|GELS_HUMAN	Gelsolin precursor (Actin-depolymerizing factor) (ADF) (Brevin) (AGEL)	YIETDPANR	10	99
29	spt|P06396|GELS_HUMAN	Gelsolin precursor (Actin-depolymerizing factor) (ADF) (Brevin) (AGEL)	AVEVLPK	13	95
30	spt|P14625|ENPL_HUMAN	Endoplasmin precursor (Heat shock protein 90 kDa beta member 1) (94 kDa glucose-regulated protein) (GRP94) (gp96 homolog) (Tumor rejection antigen 1)	DDEVDVDGTVEEDLGK	6	99
30	spt|P14625|ENPL_HUMAN	Endoplasmin precursor (Heat shock protein 90 kDa beta member 1) (94 kDa glucose-regulated protein) (GRP94) (gp96 homolog) (Tumor rejection antigen 1)	DISTNYYASQK	6	99
30	spt|P14625|ENPL_HUMAN	Endoplasmin precursor (Heat shock protein 90 kDa beta member 1) (94 kDa glucose-regulated protein) (GRP94) (gp96 homolog) (Tumor rejection antigen 1)	EAESSPFVER	11	99
30	spt|P14625|ENPL_HUMAN	Endoplasmin precursor (Heat shock protein 90 kDa beta member 1) (94 kDa glucose-regulated protein) (GRP94) (gp96 homolog) (Tumor rejection antigen 1)	EEEAIQLDGLNASQIR	15	99
30	spt|P14625|ENPL_HUMAN	Endoplasmin precursor (Heat shock protein 90 kDa beta member 1) (94 kDa glucose-regulated protein) (GRP94) (gp96 homolog) (Tumor rejection antigen 1)	EFEPLLNWMK	6	99
30	spt|P14625|ENPL_HUMAN	Endoplasmin precursor (Heat shock protein 90 kDa beta member 1) (94 kDa glucose-regulated protein) (GRP94) (gp96 homolog) (Tumor rejection antigen 1)	ELISNASDALDK	7	99
30	spt|P14625|ENPL_HUMAN	Endoplasmin precursor (Heat shock protein 90 kDa beta member 1) (94 kDa glucose-regulated protein) (GRP94) (gp96 homolog) (Tumor rejection antigen 1)	ELISNASDALDKIR	9	99
30	spt|P14625|ENPL_HUMAN	Endoplasmin precursor (Heat shock protein 90 kDa beta member 1) (94 kDa glucose-regulated protein) (GRP94) (gp96 homolog) (Tumor rejection antigen 1)	FAFQAEVNR	11	99
30	spt|P14625|ENPL_HUMAN	Endoplasmin precursor (Heat shock protein 90 kDa beta member 1) (94 kDa glucose-regulated protein) (GRP94) (gp96 homolog) (Tumor rejection antigen 1)	GLFDEYGSK	13	99
30	spt|P14625|ENPL_HUMAN	Endoplasmin precursor (Heat shock protein 90 kDa beta member 1) (94 kDa glucose-regulated protein) (GRP94) (gp96 homolog) (Tumor rejection antigen 1)	GVVDSDDLPLNVSR	21	99
30	spt|P14625|ENPL_HUMAN	Endoplasmin precursor (Heat shock protein 90 kDa beta member 1) (94 kDa glucose-regulated protein) (GRP94) (gp96 homolog) (Tumor rejection antigen 1)	IYFMAGSSR	14	99
30	spt|P14625|ENPL_HUMAN	Endoplasmin precursor (Heat shock protein 90 kDa beta member 1) (94 kDa glucose-regulated protein) (GRP94) (gp96 homolog) (Tumor rejection antigen 1)	KEAESSPFVER	4	99
30	spt|P14625|ENPL_HUMAN	Endoplasmin precursor (Heat shock protein 90 kDa beta member 1) (94 kDa glucose-regulated protein) (GRP94) (gp96 homolog) (Tumor rejection antigen 1)	LGVIEDHSNR	8	99
30	spt|P14625|ENPL_HUMAN	Endoplasmin precursor (Heat shock protein 90 kDa beta member 1) (94 kDa glucose-regulated protein) (GRP94) (gp96 homolog) (Tumor rejection antigen 1)	LIINSLYK	1	99
30	spt|P14625|ENPL_HUMAN	Endoplasmin precursor (Heat shock protein 90 kDa beta member 1) (94 kDa glucose-regulated protein) (GRP94) (gp96 homolog) (Tumor rejection antigen 1)	LTESPCALVASQYGWSGNMER	10	99
30	spt|P14625|ENPL_HUMAN	Endoplasmin precursor (Heat shock protein 90 kDa beta member 1) (94 kDa glucose-regulated protein) (GRP94) (gp96 homolog) (Tumor rejection antigen 1)	NLLHVTDTGVGMTR	15	99
30	spt|P14625|ENPL_HUMAN	Endoplasmin precursor (Heat shock protein 90 kDa beta member 1) (94 kDa glucose-regulated protein) (GRP94) (gp96 homolog) (Tumor rejection antigen 1)	PSKEVEEDEYK	2	99
30	spt|P14625|ENPL_HUMAN	Endoplasmin precursor (Heat shock protein 90 kDa beta member 1) (94 kDa glucose-regulated protein) (GRP94) (gp96 homolog) (Tumor rejection antigen 1)	SGTSEFLNK	7	99
30	spt|P14625|ENPL_HUMAN	Endoplasmin precursor (Heat shock protein 90 kDa beta member 1) (94 kDa glucose-regulated protein) (GRP94) (gp96 homolog) (Tumor rejection antigen 1)	SGYLLPDTK	10	99
30	spt|P14625|ENPL_HUMAN	Endoplasmin precursor (Heat shock protein 90 kDa beta member 1) (94 kDa glucose-regulated protein) (GRP94) (gp96 homolog) (Tumor rejection antigen 1)	SILFVPTSAPR	21	99
30	spt|P14625|ENPL_HUMAN	Endoplasmin precursor (Heat shock protein 90 kDa beta member 1) (94 kDa glucose-regulated protein) (GRP94) (gp96 homolog) (Tumor rejection antigen 1)	TDDEVVQREEEAIQLDGLNASQIR	9	99
30	spt|P14625|ENPL_HUMAN	Endoplasmin precursor (Heat shock protein 90 kDa beta member 1) (94 kDa glucose-regulated protein) (GRP94) (gp96 homolog) (Tumor rejection antigen 1)	VEEEPEEEPEETAEDTTEDTEQDEDEEMDVGTDEEEETAK	1	99
30	spt|P14625|ENPL_HUMAN	Endoplasmin precursor (Heat shock protein 90 kDa beta member 1) (94 kDa glucose-regulated protein) (GRP94) (gp96 homolog) (Tumor rejection antigen 1)	VFITDDFHDMMPK	2	99
30	spt|P14625|ENPL_HUMAN	Endoplasmin precursor (Heat shock protein 90 kDa beta member 1) (94 kDa glucose-regulated protein) (GRP94) (gp96 homolog) (Tumor rejection antigen 1)	YSQFINFPIYVWSSK	1	99
30	spt|P14625|ENPL_HUMAN	Endoplasmin precursor (Heat shock protein 90 kDa beta member 1) (94 kDa glucose-regulated protein) (GRP94) (gp96 homolog) (Tumor rejection antigen 1)	EGVKFDESEK	3	97
30	spt|P14625|ENPL_HUMAN	Endoplasmin precursor (Heat shock protein 90 kDa beta member 1) (94 kDa glucose-regulated protein) (GRP94) (gp96 homolog) (Tumor rejection antigen 1)	AQAYQTGKDISTNYYASQK	2	96
30	spt|P14625|ENPL_HUMAN	Endoplasmin precursor (Heat shock protein 90 kDa beta member 1) (94 kDa glucose-regulated protein) (GRP94) (gp96 homolog) (Tumor rejection antigen 1)	TFEINPR	13	95
31	trm|Q6NUR7|Q6NUR7_HUMAN	Villin 2 (Ezrin)	AKEAQDDLVK	8	99
31	trm|Q6NUR7|Q6NUR7_HUMAN	Villin 2 (Ezrin)	APDFVFYAPR	15	99
31	trm|Q6NUR7|Q6NUR7_HUMAN	Villin 2 (Ezrin)	AQEEAERLEADR	6	99
31	trm|Q6NUR7|Q6NUR7_HUMAN	Villin 2 (Ezrin)	EAQDDLVK	6	99
31	trm|Q6NUR7|Q6NUR7_HUMAN	Villin 2 (Ezrin)	FGDYNKEVHK	2	99
31	trm|Q6NUR7|Q6NUR7_HUMAN	Villin 2 (Ezrin)	FYPEDVAEELIQDITQK	5	99
31	trm|Q6NUR7|Q6NUR7_HUMAN	Villin 2 (Ezrin)	IALLEEAR	13	99
31	trm|Q6NUR7|Q6NUR7_HUMAN	Villin 2 (Ezrin)	IALLEEARR	2	99
31	trm|Q6NUR7|Q6NUR7_HUMAN	Villin 2 (Ezrin)	IGFPWSEIR	11	99
31	trm|Q6NUR7|Q6NUR7_HUMAN	Villin 2 (Ezrin)	KPDTIEVQQMK	3	99
31	trm|Q6NUR7|Q6NUR7_HUMAN	Villin 2 (Ezrin)	QAVDQIKSQEQLAAELAEYTAK	4	99
31	trm|Q6NUR7|Q6NUR7_HUMAN	Villin 2 (Ezrin)	QLLTLSSELSQAR	9	99
31	trm|Q6NUR7|Q6NUR7_HUMAN	Villin 2 (Ezrin)	SGYLSSER	4	99
31	trm|Q6NUR7|Q6NUR7_HUMAN	Villin 2 (Ezrin)	SQEQLAAELAEYTAK	14	99
31	trm|Q6NUR7|Q6NUR7_HUMAN	Villin 2 (Ezrin)	ALQLEEER	12	98
31	trm|Q6NUR7|Q6NUR7_HUMAN	Villin 2 (Ezrin)	ELSEQIQR	8	98
31	trm|Q6NUR7|Q6NUR7_HUMAN	Villin 2 (Ezrin)	NISFNDKK	3	98
31	trm|Q6NUR7|Q6NUR7_HUMAN	Villin 2 (Ezrin)	KENPLQFK	7	97
31	trm|Q6NUR7|Q6NUR7_HUMAN	Villin 2 (Ezrin)	QRIDEFEAL	6	97
31	trm|Q6NUR7|Q6NUR7_HUMAN	Villin 2 (Ezrin)	GFPTWLK	4	95
31	trm|Q6NUR7|Q6NUR7_HUMAN	Villin 2 (Ezrin)	LQDYEEK	2	95
32	spt|P68363|TBAK_HUMAN	Tubulin alpha-ubiquitous chain (Alpha-tubulin ubiquitous) (Tubulin K- alpha-1)	AVCMLSNTTAIAEAWAR	4	99
32	spt|P68363|TBAK_HUMAN	Tubulin alpha-ubiquitous chain (Alpha-tubulin ubiquitous) (Tubulin K- alpha-1)	AVFVDLEPTVIDEVR	11	99
32	spt|P68363|TBAK_HUMAN	Tubulin alpha-ubiquitous chain (Alpha-tubulin ubiquitous) (Tubulin K- alpha-1)	DLEPTVIDEVR	1	99
32	spt|P68363|TBAK_HUMAN	Tubulin alpha-ubiquitous chain (Alpha-tubulin ubiquitous) (Tubulin K- alpha-1)	DLTEFQTNLVPYPR	1	99
32	spt|P68363|TBAK_HUMAN	Tubulin alpha-ubiquitous chain (Alpha-tubulin ubiquitous) (Tubulin K- alpha-1)	DVNAAIATIK	11	99
32	spt|P68363|TBAK_HUMAN	Tubulin alpha-ubiquitous chain (Alpha-tubulin ubiquitous) (Tubulin K- alpha-1)	EDAANNYAR	7	99
32	spt|P68363|TBAK_HUMAN	Tubulin alpha-ubiquitous chain (Alpha-tubulin ubiquitous) (Tubulin K- alpha-1)	IHFPLATYAPVISAEK	10	99
32	spt|P68363|TBAK_HUMAN	Tubulin alpha-ubiquitous chain (Alpha-tubulin ubiquitous) (Tubulin K- alpha-1)	LSVDYGKK	6	99
32	spt|P68363|TBAK_HUMAN	Tubulin alpha-ubiquitous chain (Alpha-tubulin ubiquitous) (Tubulin K- alpha-1)	NLDIERPTYTNLNR	6	99
32	spt|P68363|TBAK_HUMAN	Tubulin alpha-ubiquitous chain (Alpha-tubulin ubiquitous) (Tubulin K- alpha-1)	NYQPPTVVPGGDLAK	1	99
32	spt|P68363|TBAK_HUMAN	Tubulin alpha-ubiquitous chain (Alpha-tubulin ubiquitous) (Tubulin K- alpha-1)	QLFHPEQLITGK	11	99
32	spt|P68363|TBAK_HUMAN	Tubulin alpha-ubiquitous chain (Alpha-tubulin ubiquitous) (Tubulin K- alpha-1)	QLFHPEQLITGKEDAANNYAR	8	99
32	spt|P68363|TBAK_HUMAN	Tubulin alpha-ubiquitous chain (Alpha-tubulin ubiquitous) (Tubulin K- alpha-1)	SIQFVDWCPTGFK	6	99
32	spt|P68363|TBAK_HUMAN	Tubulin alpha-ubiquitous chain (Alpha-tubulin ubiquitous) (Tubulin K- alpha-1)	TIGGGDDSFNTFF	6	99
32	spt|P68363|TBAK_HUMAN	Tubulin alpha-ubiquitous chain (Alpha-tubulin ubiquitous) (Tubulin K- alpha-1)	TIGGGDDSFNTFFSETGAGK	13	99
32	spt|P68363|TBAK_HUMAN	Tubulin alpha-ubiquitous chain (Alpha-tubulin ubiquitous) (Tubulin K- alpha-1)	TIQFVDWCPTGFK	1	99
32	spt|P68363|TBAK_HUMAN	Tubulin alpha-ubiquitous chain (Alpha-tubulin ubiquitous) (Tubulin K- alpha-1)	VDLEPTVIDEVR	3	99
32	spt|P68363|TBAK_HUMAN	Tubulin alpha-ubiquitous chain (Alpha-tubulin ubiquitous) (Tubulin K- alpha-1)	VDNEAIYDICR	1	99
32	spt|P68363|TBAK_HUMAN	Tubulin alpha-ubiquitous chain (Alpha-tubulin ubiquitous) (Tubulin K- alpha-1)	VGINYQPPTVVPGGDLAK	13	99
32	spt|P68363|TBAK_HUMAN	Tubulin alpha-ubiquitous chain (Alpha-tubulin ubiquitous) (Tubulin K- alpha-1)	SVEGEGEEEGEEY	6	98
32	spt|P68363|TBAK_HUMAN	Tubulin alpha-ubiquitous chain (Alpha-tubulin ubiquitous) (Tubulin K- alpha-1)	LDHKFDLMYAK	3	97
32	spt|P68363|TBAK_HUMAN	Tubulin alpha-ubiquitous chain (Alpha-tubulin ubiquitous) (Tubulin K- alpha-1)	LSVDYGK	7	95
33	spt|P22314|UBE1_HUMAN	Ubiquitin-activating enzyme E1 (A1S9 protein)	AAVATFLQSVQVPEFTPK	18	99
33	spt|P22314|UBE1_HUMAN	Ubiquitin-activating enzyme E1 (A1S9 protein)	AENYDIPSADR	9	99
33	spt|P22314|UBE1_HUMAN	Ubiquitin-activating enzyme E1 (A1S9 protein)	AKNGSEADIDEGLYSR	2	99
33	spt|P22314|UBE1_HUMAN	Ubiquitin-activating enzyme E1 (A1S9 protein)	ALPAVQQNNLDEDLIR	12	99
33	spt|P22314|UBE1_HUMAN	Ubiquitin-activating enzyme E1 (A1S9 protein)	DNPGVVTCLDEAR	10	99
33	spt|P22314|UBE1_HUMAN	Ubiquitin-activating enzyme E1 (A1S9 protein)	GGIVSQVK	9	99
33	spt|P22314|UBE1_HUMAN	Ubiquitin-activating enzyme E1 (A1S9 protein)	GGIVSQVKVPK	4	99
33	spt|P22314|UBE1_HUMAN	Ubiquitin-activating enzyme E1 (A1S9 protein)	GLGVEIAK	3	99
33	spt|P22314|UBE1_HUMAN	Ubiquitin-activating enzyme E1 (A1S9 protein)	IHVSDQELQSANASVDDSR	8	99
33	spt|P22314|UBE1_HUMAN	Ubiquitin-activating enzyme E1 (A1S9 protein)	IYDDDFFQNLDGVANALDNVDAR	7	99
33	spt|P22314|UBE1_HUMAN	Ubiquitin-activating enzyme E1 (A1S9 protein)	KPLLESGTLGTK	9	99
33	spt|P22314|UBE1_HUMAN	Ubiquitin-activating enzyme E1 (A1S9 protein)	LAGTQPLEVLEAVQR	20	99
33	spt|P22314|UBE1_HUMAN	Ubiquitin-activating enzyme E1 (A1S9 protein)	LDQPMTEIVSR	18	99
33	spt|P22314|UBE1_HUMAN	Ubiquitin-activating enzyme E1 (A1S9 protein)	LKSDTAAAAVR	11	99
33	spt|P22314|UBE1_HUMAN	Ubiquitin-activating enzyme E1 (A1S9 protein)	LQTSSVLVSGLR	14	99
33	spt|P22314|UBE1_HUMAN	Ubiquitin-activating enzyme E1 (A1S9 protein)	NEEDAAELVALAQAVNAR	16	99
33	spt|P22314|UBE1_HUMAN	Ubiquitin-activating enzyme E1 (A1S9 protein)	NFPNAIEHTLQWAR	5	99
33	spt|P22314|UBE1_HUMAN	Ubiquitin-activating enzyme E1 (A1S9 protein)	NIILGGVK	10	99
33	spt|P22314|UBE1_HUMAN	Ubiquitin-activating enzyme E1 (A1S9 protein)	QFLFRPWDVTK	8	99
33	spt|P22314|UBE1_HUMAN	Ubiquitin-activating enzyme E1 (A1S9 protein)	QLYVLGHEAMK	9	99
33	spt|P22314|UBE1_HUMAN	Ubiquitin-activating enzyme E1 (A1S9 protein)	SIPICTLK	6	99
33	spt|P22314|UBE1_HUMAN	Ubiquitin-activating enzyme E1 (A1S9 protein)	SLVASLAEPDFVVTDFAK	16	99
33	spt|P22314|UBE1_HUMAN	Ubiquitin-activating enzyme E1 (A1S9 protein)	YDGQVAVFGSDLQEK	5	99
34	spt|Q9P2E9|RRBP1_HUMAN	Ribosome-binding protein 1 (Ribosome receptor protein) (180 kDa ribosome receptor homolog) (ES/130-related protein)	AENSQLTER	7	99
34	spt|Q9P2E9|RRBP1_HUMAN	Ribosome-binding protein 1 (Ribosome receptor protein) (180 kDa ribosome receptor homolog) (ES/130-related protein)	AQEQQQQMAELHSK	10	99
34	spt|Q9P2E9|RRBP1_HUMAN	Ribosome-binding protein 1 (Ribosome receptor protein) (180 kDa ribosome receptor homolog) (ES/130-related protein)	DALNQATSQVESK	8	99
34	spt|Q9P2E9|RRBP1_HUMAN	Ribosome-binding protein 1 (Ribosome receptor protein) (180 kDa ribosome receptor homolog) (ES/130-related protein)	DAQDVQASQAEADQQQTR	16	99
34	spt|Q9P2E9|RRBP1_HUMAN	Ribosome-binding protein 1 (Ribosome receptor protein) (180 kDa ribosome receptor homolog) (ES/130-related protein)	EQEITAVQAR	15	99
34	spt|Q9P2E9|RRBP1_HUMAN	Ribosome-binding protein 1 (Ribosome receptor protein) (180 kDa ribosome receptor homolog) (ES/130-related protein)	EVPMVVVPPVGAK	8	99
34	spt|Q9P2E9|RRBP1_HUMAN	Ribosome-binding protein 1 (Ribosome receptor protein) (180 kDa ribosome receptor homolog) (ES/130-related protein)	GQKGEGAQNQGK	1	99
34	spt|Q9P2E9|RRBP1_HUMAN	Ribosome-binding protein 1 (Ribosome receptor protein) (180 kDa ribosome receptor homolog) (ES/130-related protein)	KVEGAPTQGR	3	99
34	spt|Q9P2E9|RRBP1_HUMAN	Ribosome-binding protein 1 (Ribosome receptor protein) (180 kDa ribosome receptor homolog) (ES/130-related protein)	LKGELESSDQVR	2	99
34	spt|Q9P2E9|RRBP1_HUMAN	Ribosome-binding protein 1 (Ribosome receptor protein) (180 kDa ribosome receptor homolog) (ES/130-related protein)	LLATEQEDAAVAK	5	99
34	spt|Q9P2E9|RRBP1_HUMAN	Ribosome-binding protein 1 (Ribosome receptor protein) (180 kDa ribosome receptor homolog) (ES/130-related protein)	LQQENSILR	9	99
34	spt|Q9P2E9|RRBP1_HUMAN	Ribosome-binding protein 1 (Ribosome receptor protein) (180 kDa ribosome receptor homolog) (ES/130-related protein)	LQSSEAEVR	4	99
34	spt|Q9P2E9|RRBP1_HUMAN	Ribosome-binding protein 1 (Ribosome receptor protein) (180 kDa ribosome receptor homolog) (ES/130-related protein)	QLLLESQSQLDAAK	9	99
34	spt|Q9P2E9|RRBP1_HUMAN	Ribosome-binding protein 1 (Ribosome receptor protein) (180 kDa ribosome receptor homolog) (ES/130-related protein)	QVLQLQASHR	11	99
34	spt|Q9P2E9|RRBP1_HUMAN	Ribosome-binding protein 1 (Ribosome receptor protein) (180 kDa ribosome receptor homolog) (ES/130-related protein)	SIEALLEAGQAR	15	99
34	spt|Q9P2E9|RRBP1_HUMAN	Ribosome-binding protein 1 (Ribosome receptor protein) (180 kDa ribosome receptor homolog) (ES/130-related protein)	SILAETEGMLR	8	99
34	spt|Q9P2E9|RRBP1_HUMAN	Ribosome-binding protein 1 (Ribosome receptor protein) (180 kDa ribosome receptor homolog) (ES/130-related protein)	TAGPLESSETEEASQLKER	5	99
34	spt|Q9P2E9|RRBP1_HUMAN	Ribosome-binding protein 1 (Ribosome receptor protein) (180 kDa ribosome receptor homolog) (ES/130-related protein)	TLQEQLENGPNTQLAR	7	99
34	spt|Q9P2E9|RRBP1_HUMAN	Ribosome-binding protein 1 (Ribosome receptor protein) (180 kDa ribosome receptor homolog) (ES/130-related protein)	TLVSTVGSMVFNEGEAQR	9	99
34	spt|Q9P2E9|RRBP1_HUMAN	Ribosome-binding protein 1 (Ribosome receptor protein) (180 kDa ribosome receptor homolog) (ES/130-related protein)	TQLEWTEAILEDEQTQR	15	99
34	spt|Q9P2E9|RRBP1_HUMAN	Ribosome-binding protein 1 (Ribosome receptor protein) (180 kDa ribosome receptor homolog) (ES/130-related protein)	VEGAPTQGR	6	99
34	spt|Q9P2E9|RRBP1_HUMAN	Ribosome-binding protein 1 (Ribosome receptor protein) (180 kDa ribosome receptor homolog) (ES/130-related protein)	VEPAVSSVVNSIQVLTSK	11	99
34	spt|Q9P2E9|RRBP1_HUMAN	Ribosome-binding protein 1 (Ribosome receptor protein) (180 kDa ribosome receptor homolog) (ES/130-related protein)	KAEGAQNQGK	5	98
34	spt|Q9P2E9|RRBP1_HUMAN	Ribosome-binding protein 1 (Ribosome receptor protein) (180 kDa ribosome receptor homolog) (ES/130-related protein)	SVEEEEQVWR	5	97
35	trm|Q6FHP9|Q6FHP9_HUMAN	Triosephosphate isomerase (EC 5.3.1.1) (TIM) (Triose-phosphate isomerase) (Fragment)	DCGATWVVLGHSER	10	99
35	trm|Q6FHP9|Q6FHP9_HUMAN	Triosephosphate isomerase (EC 5.3.1.1) (TIM) (Triose-phosphate isomerase) (Fragment)	ELASQPDVDGFLVGGASLKPEFVDIINAK	6	99
35	trm|Q6FHP9|Q6FHP9_HUMAN	Triosephosphate isomerase (EC 5.3.1.1) (TIM) (Triose-phosphate isomerase) (Fragment)	ELASQPDVDGFLVGGASLKPEFVDIINAKQ	3	99
35	trm|Q6FHP9|Q6FHP9_HUMAN	Triosephosphate isomerase (EC 5.3.1.1) (TIM) (Triose-phosphate isomerase) (Fragment)	FFVGGNWK	10	99
35	trm|Q6FHP9|Q6FHP9_HUMAN	Triosephosphate isomerase (EC 5.3.1.1) (TIM) (Triose-phosphate isomerase) (Fragment)	HVFGESDELIGQK	10	99
35	trm|Q6FHP9|Q6FHP9_HUMAN	Triosephosphate isomerase (EC 5.3.1.1) (TIM) (Triose-phosphate isomerase) (Fragment)	IAVAAQNCYK	10	99
35	trm|Q6FHP9|Q6FHP9_HUMAN	Triosephosphate isomerase (EC 5.3.1.1) (TIM) (Triose-phosphate isomerase) (Fragment)	IIYGGSVTGATCK	21	99
35	trm|Q6FHP9|Q6FHP9_HUMAN	Triosephosphate isomerase (EC 5.3.1.1) (TIM) (Triose-phosphate isomerase) (Fragment)	KFFVGGNWK	6	99
35	trm|Q6FHP9|Q6FHP9_HUMAN	Triosephosphate isomerase (EC 5.3.1.1) (TIM) (Triose-phosphate isomerase) (Fragment)	KQSLGELIGTLNAAK	10	99
35	trm|Q6FHP9|Q6FHP9_HUMAN	Triosephosphate isomerase (EC 5.3.1.1) (TIM) (Triose-phosphate isomerase) (Fragment)	LDEREAGITEK	3	99
35	trm|Q6FHP9|Q6FHP9_HUMAN	Triosephosphate isomerase (EC 5.3.1.1) (TIM) (Triose-phosphate isomerase) (Fragment)	PPTAYIDFAR	2	99
35	trm|Q6FHP9|Q6FHP9_HUMAN	Triosephosphate isomerase (EC 5.3.1.1) (TIM) (Triose-phosphate isomerase) (Fragment)	QSLGELIGTLNAAK	21	99
35	trm|Q6FHP9|Q6FHP9_HUMAN	Triosephosphate isomerase (EC 5.3.1.1) (TIM) (Triose-phosphate isomerase) (Fragment)	SNVSDAVAQSTR	19	99
35	trm|Q6FHP9|Q6FHP9_HUMAN	Triosephosphate isomerase (EC 5.3.1.1) (TIM) (Triose-phosphate isomerase) (Fragment)	TATPQQAQEVHEK	16	99
35	trm|Q6FHP9|Q6FHP9_HUMAN	Triosephosphate isomerase (EC 5.3.1.1) (TIM) (Triose-phosphate isomerase) (Fragment)	VIADNVKDW	2	99
35	trm|Q6FHP9|Q6FHP9_HUMAN	Triosephosphate isomerase (EC 5.3.1.1) (TIM) (Triose-phosphate isomerase) (Fragment)	VIADNVKDWSK	8	99
35	trm|Q6FHP9|Q6FHP9_HUMAN	Triosephosphate isomerase (EC 5.3.1.1) (TIM) (Triose-phosphate isomerase) (Fragment)	VPADTEVVCAPPTAYIDFAR	16	99
35	trm|Q6FHP9|Q6FHP9_HUMAN	Triosephosphate isomerase (EC 5.3.1.1) (TIM) (Triose-phosphate isomerase) (Fragment)	VTNGAFTGEISPGMIK	18	99
35	trm|Q6FHP9|Q6FHP9_HUMAN	Triosephosphate isomerase (EC 5.3.1.1) (TIM) (Triose-phosphate isomerase) (Fragment)	VVLAYEPVWAIGTGK	16	99
35	trm|Q6FHP9|Q6FHP9_HUMAN	Triosephosphate isomerase (EC 5.3.1.1) (TIM) (Triose-phosphate isomerase) (Fragment)	VVFEQTK	15	98
35	trm|Q6FHP9|Q6FHP9_HUMAN	Triosephosphate isomerase (EC 5.3.1.1) (TIM) (Triose-phosphate isomerase) (Fragment)	RHVFGESDELIGQK	10	96
35	trm|Q6FHP9|Q6FHP9_HUMAN	Triosephosphate isomerase (EC 5.3.1.1) (TIM) (Triose-phosphate isomerase) (Fragment)	VIADNVK	9	96
35	trm|Q6FHP9|Q6FHP9_HUMAN	Triosephosphate isomerase (EC 5.3.1.1) (TIM) (Triose-phosphate isomerase) (Fragment)	EAGITEK	11	95
36	trm|Q5J7W1|Q5J7W1_HUMAN	Phosphoglycerate kinase (EC 2.7.2.3)	ACANPAAGSVILLENLR	17	99
36	trm|Q5J7W1|Q5J7W1_HUMAN	Phosphoglycerate kinase (EC 2.7.2.3)	AEPAKIEAFR	12	99
36	trm|Q5J7W1|Q5J7W1_HUMAN	Phosphoglycerate kinase (EC 2.7.2.3)	AHSSMVGVNLPQK	15	99
36	trm|Q5J7W1|Q5J7W1_HUMAN	Phosphoglycerate kinase (EC 2.7.2.3)	ALESPERPFLAILGGAK	12	99
36	trm|Q5J7W1|Q5J7W1_HUMAN	Phosphoglycerate kinase (EC 2.7.2.3)	ALMDEVVK	12	99
36	trm|Q5J7W1|Q5J7W1_HUMAN	Phosphoglycerate kinase (EC 2.7.2.3)	DCVGPEVEK	7	99
36	trm|Q5J7W1|Q5J7W1_HUMAN	Phosphoglycerate kinase (EC 2.7.2.3)	FCLDNGAK	9	99
36	trm|Q5J7W1|Q5J7W1_HUMAN	Phosphoglycerate kinase (EC 2.7.2.3)	GCITIIGGGDTATCCAK	4	99
36	trm|Q5J7W1|Q5J7W1_HUMAN	Phosphoglycerate kinase (EC 2.7.2.3)	ITLPVDFVTADK	14	99
36	trm|Q5J7W1|Q5J7W1_HUMAN	Phosphoglycerate kinase (EC 2.7.2.3)	ITLPVDFVTADKFDENAK	11	99
36	trm|Q5J7W1|Q5J7W1_HUMAN	Phosphoglycerate kinase (EC 2.7.2.3)	KYAEAVTR	5	99
36	trm|Q5J7W1|Q5J7W1_HUMAN	Phosphoglycerate kinase (EC 2.7.2.3)	LGDVYVNDAFGTAHR	18	99
36	trm|Q5J7W1|Q5J7W1_HUMAN	Phosphoglycerate kinase (EC 2.7.2.3)	LTLDKLDVK	13	99
36	trm|Q5J7W1|Q5J7W1_HUMAN	Phosphoglycerate kinase (EC 2.7.2.3)	SLLGKDVLFLK	4	99
36	trm|Q5J7W1|Q5J7W1_HUMAN	Phosphoglycerate kinase (EC 2.7.2.3)	SLSNKLTLDKLDVK	5	99
36	trm|Q5J7W1|Q5J7W1_HUMAN	Phosphoglycerate kinase (EC 2.7.2.3)	TGQATVASGIPAGWMGLDCGPESSK	8	99
36	trm|Q5J7W1|Q5J7W1_HUMAN	Phosphoglycerate kinase (EC 2.7.2.3)	VDFNVPMK	11	99
36	trm|Q5J7W1|Q5J7W1_HUMAN	Phosphoglycerate kinase (EC 2.7.2.3)	VDFNVPMKNNQITNNQR	13	99
36	trm|Q5J7W1|Q5J7W1_HUMAN	Phosphoglycerate kinase (EC 2.7.2.3)	VLNNMEIGTSLFDEEGAK	7	99
36	trm|Q5J7W1|Q5J7W1_HUMAN	Phosphoglycerate kinase (EC 2.7.2.3)	VLPGVDALSNI	20	99
36	trm|Q5J7W1|Q5J7W1_HUMAN	Phosphoglycerate kinase (EC 2.7.2.3)	VSHVSTGGGASLELLEGK	10	99
36	trm|Q5J7W1|Q5J7W1_HUMAN	Phosphoglycerate kinase (EC 2.7.2.3)	KELNYFAK	6	98
36	trm|Q5J7W1|Q5J7W1_HUMAN	Phosphoglycerate kinase (EC 2.7.2.3)	AGGFLMK	19	97
36	trm|Q5J7W1|Q5J7W1_HUMAN	Phosphoglycerate kinase (EC 2.7.2.3)	ELNYFAK	18	97
36	trm|Q5J7W1|Q5J7W1_HUMAN	Phosphoglycerate kinase (EC 2.7.2.3)	YAEAVTR	8	97
36	trm|Q5J7W1|Q5J7W1_HUMAN	Phosphoglycerate kinase (EC 2.7.2.3)	YSLEPVAVELK	4	97
37	spt|P63104|1433Z_HUMAN	14-3-3 protein zeta/delta (Protein kinase C inhibitor protein 1) (KCIP-1)	DICNDVLSLLEK	6	99
37	spt|P63104|1433Z_HUMAN	14-3-3 protein zeta/delta (Protein kinase C inhibitor protein 1) (KCIP-1)	DNLTLWTSDTQGDEAEAGEGGEN	7	99
37	spt|P63104|1433Z_HUMAN	14-3-3 protein zeta/delta (Protein kinase C inhibitor protein 1) (KCIP-1)	DSTLIMQLLR	11	99
37	spt|P63104|1433Z_HUMAN	14-3-3 protein zeta/delta (Protein kinase C inhibitor protein 1) (KCIP-1)	EMQPTHPIR	9	99
37	spt|P63104|1433Z_HUMAN	14-3-3 protein zeta/delta (Protein kinase C inhibitor protein 1) (KCIP-1)	GIVDQSQQAYQEAFEISK	14	99
37	spt|P63104|1433Z_HUMAN	14-3-3 protein zeta/delta (Protein kinase C inhibitor protein 1) (KCIP-1)	GIVDQSQQAYQEAFEISKK	6	99
37	spt|P63104|1433Z_HUMAN	14-3-3 protein zeta/delta (Protein kinase C inhibitor protein 1) (KCIP-1)	MDKNELVQK	10	99
37	spt|P63104|1433Z_HUMAN	14-3-3 protein zeta/delta (Protein kinase C inhibitor protein 1) (KCIP-1)	NLLSVAYK	19	99
37	spt|P63104|1433Z_HUMAN	14-3-3 protein zeta/delta (Protein kinase C inhibitor protein 1) (KCIP-1)	NLLSVAYKNVVGAR	6	99
37	spt|P63104|1433Z_HUMAN	14-3-3 protein zeta/delta (Protein kinase C inhibitor protein 1) (KCIP-1)	SVTEQGAELSNEER	18	99
37	spt|P63104|1433Z_HUMAN	14-3-3 protein zeta/delta (Protein kinase C inhibitor protein 1) (KCIP-1)	TAFDEAIAELDTLSEESYK	7	99
37	spt|P63104|1433Z_HUMAN	14-3-3 protein zeta/delta (Protein kinase C inhibitor protein 1) (KCIP-1)	VVSSIEQK	11	99
37	spt|P63104|1433Z_HUMAN	14-3-3 protein zeta/delta (Protein kinase C inhibitor protein 1) (KCIP-1)	VVSSIEQKTEGAEK	5	99
37	spt|P63104|1433Z_HUMAN	14-3-3 protein zeta/delta (Protein kinase C inhibitor protein 1) (KCIP-1)	YDDMAACMK	2	99
37	spt|P63104|1433Z_HUMAN	14-3-3 protein zeta/delta (Protein kinase C inhibitor protein 1) (KCIP-1)	YLAEVAAGDDK	5	99
37	spt|P63104|1433Z_HUMAN	14-3-3 protein zeta/delta (Protein kinase C inhibitor protein 1) (KCIP-1)	YLAEVAAGDDKK	10	99
37	spt|P63104|1433Z_HUMAN	14-3-3 protein zeta/delta (Protein kinase C inhibitor protein 1) (KCIP-1)	FLIPNASQAESK	7	98
37	spt|P63104|1433Z_HUMAN	14-3-3 protein zeta/delta (Protein kinase C inhibitor protein 1) (KCIP-1)	AKLAEQAER	3	97
38	trm|Q8WUK1|Q8WUK1_HUMAN	IGHM protein	DGFFGNPR	8	99
38	trm|Q8WUK1|Q8WUK1_HUMAN	IGHM protein	EVQLLESGGGLVQPGGSLR	4	99
38	trm|Q8WUK1|Q8WUK1_HUMAN	IGHM protein	FTCTVTHTDLPSPLK	5	99
38	trm|Q8WUK1|Q8WUK1_HUMAN	IGHM protein	LICQATGFSPR	5	99
38	trm|Q8WUK1|Q8WUK1_HUMAN	IGHM protein	NVPLPVIAELPPK	6	99
38	trm|Q8WUK1|Q8WUK1_HUMAN	IGHM protein	QVGSGVTTDQVQAEAK	8	99
38	trm|Q8WUK1|Q8WUK1_HUMAN	IGHM protein	QVQLVESGGGVVQPGR	9	99
38	trm|Q8WUK1|Q8WUK1_HUMAN	IGHM protein	VFAIPPSFASIFLTK	3	99
38	trm|Q8WUK1|Q8WUK1_HUMAN	IGHM protein	VSVFVPPR	7	99
38	trm|Q8WUK1|Q8WUK1_HUMAN	IGHM protein	YVTSAPMPEPQAPGR	8	99
38	trm|Q8WUK1|Q8WUK1_HUMAN	IGHM protein	QIQVSWLR	6	97
38	trm|Q8WUK1|Q8WUK1_HUMAN	IGHM protein	GVALHRPDVYLLPPAR	5	96
38	trm|Q8WUK1|Q8WUK1_HUMAN	IGHM protein	GFPSVLR	8	95
39	spt|P22626|ROA2_HUMAN	Heterogeneous nuclear ribonucleoproteins A2/B1 (hnRNP A2 / hnRNP B1)	DYFEEYGK	6	99
39	spt|P22626|ROA2_HUMAN	Heterogeneous nuclear ribonucleoproteins A2/B1 (hnRNP A2 / hnRNP B1)	EDTEEHHLR	2	99
39	spt|P22626|ROA2_HUMAN	Heterogeneous nuclear ribonucleoproteins A2/B1 (hnRNP A2 / hnRNP B1)	EESGKPGAHVTVK	6	99
39	spt|P22626|ROA2_HUMAN	Heterogeneous nuclear ribonucleoproteins A2/B1 (hnRNP A2 / hnRNP B1)	GFGFVTFDDHDPVDK	6	99
39	spt|P22626|ROA2_HUMAN	Heterogeneous nuclear ribonucleoproteins A2/B1 (hnRNP A2 / hnRNP B1)	GGGGNFGPGPGSN	2	99
39	spt|P22626|ROA2_HUMAN	Heterogeneous nuclear ribonucleoproteins A2/B1 (hnRNP A2 / hnRNP B1)	GGGGNFGPGPGSNFR	7	99
39	spt|P22626|ROA2_HUMAN	Heterogeneous nuclear ribonucleoproteins A2/B1 (hnRNP A2 / hnRNP B1)	GGNFGFGDSR	14	99
39	spt|P22626|ROA2_HUMAN	Heterogeneous nuclear ribonucleoproteins A2/B1 (hnRNP A2 / hnRNP B1)	GGSGGSGGYGGR	1	99
39	spt|P22626|ROA2_HUMAN	Heterogeneous nuclear ribonucleoproteins A2/B1 (hnRNP A2 / hnRNP B1)	GSGGSGGYGGR	1	99
39	spt|P22626|ROA2_HUMAN	Heterogeneous nuclear ribonucleoproteins A2/B1 (hnRNP A2 / hnRNP B1)	IDTIEIITDR	10	99
39	spt|P22626|ROA2_HUMAN	Heterogeneous nuclear ribonucleoproteins A2/B1 (hnRNP A2 / hnRNP B1)	KLFIGGLSFETTEESLR	2	99
39	spt|P22626|ROA2_HUMAN	Heterogeneous nuclear ribonucleoproteins A2/B1 (hnRNP A2 / hnRNP B1)	LTDCVVMR	8	99
39	spt|P22626|ROA2_HUMAN	Heterogeneous nuclear ribonucleoproteins A2/B1 (hnRNP A2 / hnRNP B1)	NQQPSNYGPMK	2	99
39	spt|P22626|ROA2_HUMAN	Heterogeneous nuclear ribonucleoproteins A2/B1 (hnRNP A2 / hnRNP B1)	TLETVPLER	9	99
39	spt|P22626|ROA2_HUMAN	Heterogeneous nuclear ribonucleoproteins A2/B1 (hnRNP A2 / hnRNP B1)	YHTINGHNAEVR	6	99
39	spt|P22626|ROA2_HUMAN	Heterogeneous nuclear ribonucleoproteins A2/B1 (hnRNP A2 / hnRNP B1)	ALSRQEMQEVQSSRSGR	5	98
39	spt|P22626|ROA2_HUMAN	Heterogeneous nuclear ribonucleoproteins A2/B1 (hnRNP A2 / hnRNP B1)	QEMQEVQSSR	7	98
40	trm|Q6IBN1|Q6IBN1_HUMAN	HNRPK protein (Heterogeneous nuclear ribonucleoprotein K)	ALRTDYNASVSVPDSSGPER	7	99
40	trm|Q6IBN1|Q6IBN1_HUMAN	HNRPK protein (Heterogeneous nuclear ribonucleoprotein K)	DLAGSIIGK	15	99
40	trm|Q6IBN1|Q6IBN1_HUMAN	HNRPK protein (Heterogeneous nuclear ribonucleoprotein K)	DYDDMSPR	6	99
40	trm|Q6IBN1|Q6IBN1_HUMAN	HNRPK protein (Heterogeneous nuclear ribonucleoprotein K)	GGDLMAYDR	13	99
40	trm|Q6IBN1|Q6IBN1_HUMAN	HNRPK protein (Heterogeneous nuclear ribonucleoprotein K)	GSDFDCELR	9	99
40	trm|Q6IBN1|Q6IBN1_HUMAN	HNRPK protein (Heterogeneous nuclear ribonucleoprotein K)	GSYGDLGGPIITTQVTIPK	11	99
40	trm|Q6IBN1|Q6IBN1_HUMAN	HNRPK protein (Heterogeneous nuclear ribonucleoprotein K)	IDEPLEGSEDR	10	99
40	trm|Q6IBN1|Q6IBN1_HUMAN	HNRPK protein (Heterogeneous nuclear ribonucleoprotein K)	IILDLISESPIK	2	99
40	trm|Q6IBN1|Q6IBN1_HUMAN	HNRPK protein (Heterogeneous nuclear ribonucleoprotein K)	IITITGTQDQIQNAQYLLQNSVK	16	99
40	trm|Q6IBN1|Q6IBN1_HUMAN	HNRPK protein (Heterogeneous nuclear ribonucleoprotein K)	LFQECCPHSTDR	3	99
40	trm|Q6IBN1|Q6IBN1_HUMAN	HNRPK protein (Heterogeneous nuclear ribonucleoprotein K)	NAGAVIGK	9	99
40	trm|Q6IBN1|Q6IBN1_HUMAN	HNRPK protein (Heterogeneous nuclear ribonucleoprotein K)	NLPLPPPPPPR	18	99
40	trm|Q6IBN1|Q6IBN1_HUMAN	HNRPK protein (Heterogeneous nuclear ribonucleoprotein K)	NTDEMVELR	13	99
40	trm|Q6IBN1|Q6IBN1_HUMAN	HNRPK protein (Heterogeneous nuclear ribonucleoprotein K)	SADETWDSAIDTWSPSEWQMAYEPQGGSGYDYSYAGGR	1	99
40	trm|Q6IBN1|Q6IBN1_HUMAN	HNRPK protein (Heterogeneous nuclear ribonucleoprotein K)	TDYNASVSVPDSSGPER	14	99
40	trm|Q6IBN1|Q6IBN1_HUMAN	HNRPK protein (Heterogeneous nuclear ribonucleoprotein K)	RTDYNASVSVPDSSGPER	1	97
41	trm|Q6FGI1|Q6FGI1_HUMAN	TAGLN2 protein (Transgelin 2)	ANRGPAYGLSR	10	99
41	trm|Q6FGI1|Q6FGI1_HUMAN	TAGLN2 protein (Transgelin 2)	DDGLFSGDPNWFPK	10	99
41	trm|Q6FGI1|Q6FGI1_HUMAN	TAGLN2 protein (Transgelin 2)	GASQAGMTGYGMPR	11	99
41	trm|Q6FGI1|Q6FGI1_HUMAN	TAGLN2 protein (Transgelin 2)	GPAYGLSR	9	99
41	trm|Q6FGI1|Q6FGI1_HUMAN	TAGLN2 protein (Transgelin 2)	IQASTMAFK	6	99
41	trm|Q6FGI1|Q6FGI1_HUMAN	TAGLN2 protein (Transgelin 2)	KIQASTMAFK	2	99
41	trm|Q6FGI1|Q6FGI1_HUMAN	TAGLN2 protein (Transgelin 2)	NFSDNQLQEGK	16	99
41	trm|Q6FGI1|Q6FGI1_HUMAN	TAGLN2 protein (Transgelin 2)	NVIGLQMGTN	7	99
41	trm|Q6FGI1|Q6FGI1_HUMAN	TAGLN2 protein (Transgelin 2)	NVIGLQMGTNR	13	99
41	trm|Q6FGI1|Q6FGI1_HUMAN	TAGLN2 protein (Transgelin 2)	QMEQISQFLQAAER	10	99
41	trm|Q6FGI1|Q6FGI1_HUMAN	TAGLN2 protein (Transgelin 2)	TLMNLGGLAVAR	19	99
41	trm|Q6FGI1|Q6FGI1_HUMAN	TAGLN2 protein (Transgelin 2)	YGINTTDIFQTVDLWEGK	10	99
41	trm|Q6FGI1|Q6FGI1_HUMAN	TAGLN2 protein (Transgelin 2)	EVQQKIEK	4	98
41	trm|Q6FGI1|Q6FGI1_HUMAN	TAGLN2 protein (Transgelin 2)	NFSDNQLQEGKN	1	97
42	trm|Q6FHB3|Q6FHB3_HUMAN	ANXA5 protein (Hypothetical protein ANXA5) (Fragment)	ALLLLCGEDD	16	99
42	trm|Q6FHB3|Q6FHB3_HUMAN	ANXA5 protein (Hypothetical protein ANXA5) (Fragment)	DLLDDLKSELTGK	1	99
42	trm|Q6FHB3|Q6FHB3_HUMAN	ANXA5 protein (Hypothetical protein ANXA5) (Fragment)	DPDAGIDEAQVEQDAQALFQAGELK	9	99
42	trm|Q6FHB3|Q6FHB3_HUMAN	ANXA5 protein (Hypothetical protein ANXA5) (Fragment)	ETSGNLEQLLLAVVK	5	99
42	trm|Q6FHB3|Q6FHB3_HUMAN	ANXA5 protein (Hypothetical protein ANXA5) (Fragment)	FITIFGTR	12	99
42	trm|Q6FHB3|Q6FHB3_HUMAN	ANXA5 protein (Hypothetical protein ANXA5) (Fragment)	GAGTDDHTLIR	6	99
42	trm|Q6FHB3|Q6FHB3_HUMAN	ANXA5 protein (Hypothetical protein ANXA5) (Fragment)	GLGTDEESILTLLTSR	16	99
42	trm|Q6FHB3|Q6FHB3_HUMAN	ANXA5 protein (Hypothetical protein ANXA5) (Fragment)	GTVTDFPGFDER	18	99
42	trm|Q6FHB3|Q6FHB3_HUMAN	ANXA5 protein (Hypothetical protein ANXA5) (Fragment)	GTVTDFPGFDERADAETLR	9	99
42	trm|Q6FHB3|Q6FHB3_HUMAN	ANXA5 protein (Hypothetical protein ANXA5) (Fragment)	GTVTDFPGFDERADAETLRK	6	99
42	trm|Q6FHB3|Q6FHB3_HUMAN	ANXA5 protein (Hypothetical protein ANXA5) (Fragment)	KNFATSLYSMIK	2	99
42	trm|Q6FHB3|Q6FHB3_HUMAN	ANXA5 protein (Hypothetical protein ANXA5) (Fragment)	LIVALMKPSR	5	99
42	trm|Q6FHB3|Q6FHB3_HUMAN	ANXA5 protein (Hypothetical protein ANXA5) (Fragment)	LYDAYELK	10	99
42	trm|Q6FHB3|Q6FHB3_HUMAN	ANXA5 protein (Hypothetical protein ANXA5) (Fragment)	NFATSLYSMIK	7	99
42	trm|Q6FHB3|Q6FHB3_HUMAN	ANXA5 protein (Hypothetical protein ANXA5) (Fragment)	QEISAAFK	13	99
42	trm|Q6FHB3|Q6FHB3_HUMAN	ANXA5 protein (Hypothetical protein ANXA5) (Fragment)	QVYEEEYGSSLEDDVVGDTSGYYQR	10	99
42	trm|Q6FHB3|Q6FHB3_HUMAN	ANXA5 protein (Hypothetical protein ANXA5) (Fragment)	SEIDLFNIR	14	99
42	trm|Q6FHB3|Q6FHB3_HUMAN	ANXA5 protein (Hypothetical protein ANXA5) (Fragment)	SIPAYLAETLYYAMK	4	99
42	trm|Q6FHB3|Q6FHB3_HUMAN	ANXA5 protein (Hypothetical protein ANXA5) (Fragment)	VLTEIIASR	21	99
42	trm|Q6FHB3|Q6FHB3_HUMAN	ANXA5 protein (Hypothetical protein ANXA5) (Fragment)	HALKGAGTNEK	2	95
43	trm|Q8N1C8|Q8N1C8_HUMAN	Heat shock 70kD protein 9B (Mortalin-2) (Fragment)	AQFEGIVTDLIR	7	99
43	trm|Q8N1C8|Q8N1C8_HUMAN	Heat shock 70kD protein 9B (Mortalin-2) (Fragment)	DAGQISGLNVLR	8	99
43	trm|Q8N1C8|Q8N1C8_HUMAN	Heat shock 70kD protein 9B (Mortalin-2) (Fragment)	LLGQFTLIGIPPAPR	7	99
43	trm|Q8N1C8|Q8N1C8_HUMAN	Heat shock 70kD protein 9B (Mortalin-2) (Fragment)	LYSPSQIGAFVLMK	3	99
43	trm|Q8N1C8|Q8N1C8_HUMAN	Heat shock 70kD protein 9B (Mortalin-2) (Fragment)	NAVITVPAYFNDSQR	5	99
43	trm|Q8N1C8|Q8N1C8_HUMAN	Heat shock 70kD protein 9B (Mortalin-2) (Fragment)	QAASSLQQASLK	4	99
43	trm|Q8N1C8|Q8N1C8_HUMAN	Heat shock 70kD protein 9B (Mortalin-2) (Fragment)	QAVTNPNNTFYATK	8	99
43	trm|Q8N1C8|Q8N1C8_HUMAN	Heat shock 70kD protein 9B (Mortalin-2) (Fragment)	STNGDTFLGGEDFDQALLR	10	99
43	trm|Q8N1C8|Q8N1C8_HUMAN	Heat shock 70kD protein 9B (Mortalin-2) (Fragment)	TTPSVVAFTADGER	11	99
43	trm|Q8N1C8|Q8N1C8_HUMAN	Heat shock 70kD protein 9B (Mortalin-2) (Fragment)	VEAVNMAEGIIHDTETK	5	99
43	trm|Q8N1C8|Q8N1C8_HUMAN	Heat shock 70kD protein 9B (Mortalin-2) (Fragment)	VINEPTAAALAYGLDK	11	99
43	trm|Q8N1C8|Q8N1C8_HUMAN	Heat shock 70kD protein 9B (Mortalin-2) (Fragment)	VLENAEGAR	8	99
43	trm|Q8N1C8|Q8N1C8_HUMAN	Heat shock 70kD protein 9B (Mortalin-2) (Fragment)	VQQTVQDLFGR	9	99
44	spt|P06576|ATPB_HUMAN	"ATP synthase subunit beta, mitochondrial precursor (EC 3.6.3.14) "	AHGGYSVFAGVGER	5	99
44	spt|P06576|ATPB_HUMAN	"ATP synthase subunit beta, mitochondrial precursor (EC 3.6.3.14) "	AIAELGIYPAVD	2	99
44	spt|P06576|ATPB_HUMAN	"ATP synthase subunit beta, mitochondrial precursor (EC 3.6.3.14) "	AIAELGIYPAVDPLDSTSR	18	99
44	spt|P06576|ATPB_HUMAN	"ATP synthase subunit beta, mitochondrial precursor (EC 3.6.3.14) "	FLSQPFQVAEVFTGHMGK	7	99
44	spt|P06576|ATPB_HUMAN	"ATP synthase subunit beta, mitochondrial precursor (EC 3.6.3.14) "	FTQAGSEVSALLGR	11	99
44	spt|P06576|ATPB_HUMAN	"ATP synthase subunit beta, mitochondrial precursor (EC 3.6.3.14) "	IGLFGGAGVGK	8	99
44	spt|P06576|ATPB_HUMAN	"ATP synthase subunit beta, mitochondrial precursor (EC 3.6.3.14) "	IMDPNIVGSEHYDVAR	12	99
44	spt|P06576|ATPB_HUMAN	"ATP synthase subunit beta, mitochondrial precursor (EC 3.6.3.14) "	IMNVIGEPIDER	18	99
44	spt|P06576|ATPB_HUMAN	"ATP synthase subunit beta, mitochondrial precursor (EC 3.6.3.14) "	IPSAVGYQPTLATDMGTMQER	9	99
44	spt|P06576|ATPB_HUMAN	"ATP synthase subunit beta, mitochondrial precursor (EC 3.6.3.14) "	IPVGPETLGR	8	99
44	spt|P06576|ATPB_HUMAN	"ATP synthase subunit beta, mitochondrial precursor (EC 3.6.3.14) "	LVLEVAQHLGESTVR	10	99
44	spt|P06576|ATPB_HUMAN	"ATP synthase subunit beta, mitochondrial precursor (EC 3.6.3.14) "	LVPLKETIK	3	99
44	spt|P06576|ATPB_HUMAN	"ATP synthase subunit beta, mitochondrial precursor (EC 3.6.3.14) "	PAVDPLDSTSR	3	99
44	spt|P06576|ATPB_HUMAN	"ATP synthase subunit beta, mitochondrial precursor (EC 3.6.3.14) "	TIAMDGTEGLVR	15	99
44	spt|P06576|ATPB_HUMAN	"ATP synthase subunit beta, mitochondrial precursor (EC 3.6.3.14) "	TVLIMELINNVAK	7	99
44	spt|P06576|ATPB_HUMAN	"ATP synthase subunit beta, mitochondrial precursor (EC 3.6.3.14) "	VALVYGQMNEPPGAR	17	99
44	spt|P06576|ATPB_HUMAN	"ATP synthase subunit beta, mitochondrial precursor (EC 3.6.3.14) "	VLDSGAPIKIPVGPETLGR	14	99
44	spt|P06576|ATPB_HUMAN	"ATP synthase subunit beta, mitochondrial precursor (EC 3.6.3.14) "	VVDLLAPYAK	9	99
45	trm|Q6N090|Q6N090_HUMAN	Hypothetical protein DKFZp686G21220 (Fragment)	DASGVTFTWTPSSGK	1	99
45	trm|Q6N090|Q6N090_HUMAN	Hypothetical protein DKFZp686G21220 (Fragment)	NFPPSQDASGDLYTTSSQLTLPATQCLAGK	2	99
45	trm|Q6N090|Q6N090_HUMAN	Hypothetical protein DKFZp686G21220 (Fragment)	QEPSQGTTTFAVTSILR	2	99
45	trm|Q6N090|Q6N090_HUMAN	Hypothetical protein DKFZp686G21220 (Fragment)	SAVQGPPER	2	99
45	trm|Q6N090|Q6N090_HUMAN	Hypothetical protein DKFZp686G21220 (Fragment)	TFTCTAAYPESK	1	99
45	trm|Q6N090|Q6N090_HUMAN	Hypothetical protein DKFZp686G21220 (Fragment)	TPLTATLSK	2	99
45	trm|Q6N090|Q6N090_HUMAN	Hypothetical protein DKFZp686G21220 (Fragment)	WLQGSQELPR	2	99
46	spt|Q96KP4|CNDP2_HUMAN	Cytosolic nonspecific dipeptidase (Glutamate carboxypeptidase-like protein 1) (CNDP dipeptidase 2)	DVDYVCISDNYWLGK	2	99
46	spt|Q96KP4|CNDP2_HUMAN	Cytosolic nonspecific dipeptidase (Glutamate carboxypeptidase-like protein 1) (CNDP dipeptidase 2)	EGGSIPVTLTFQEATGK	17	99
46	spt|Q96KP4|CNDP2_HUMAN	Cytosolic nonspecific dipeptidase (Glutamate carboxypeptidase-like protein 1) (CNDP dipeptidase 2)	GNILIPGINEAVAAVTEEEHK	8	99
46	spt|Q96KP4|CNDP2_HUMAN	Cytosolic nonspecific dipeptidase (Glutamate carboxypeptidase-like protein 1) (CNDP dipeptidase 2)	GSTDDKGPVAGWINALEAYQK	8	99
46	spt|Q96KP4|CNDP2_HUMAN	Cytosolic nonspecific dipeptidase (Glutamate carboxypeptidase-like protein 1) (CNDP dipeptidase 2)	LGSDPQKK	5	99
46	spt|Q96KP4|CNDP2_HUMAN	Cytosolic nonspecific dipeptidase (Glutamate carboxypeptidase-like protein 1) (CNDP dipeptidase 2)	LPDGSEIPLPPILLGR	9	99
46	spt|Q96KP4|CNDP2_HUMAN	Cytosolic nonspecific dipeptidase (Glutamate carboxypeptidase-like protein 1) (CNDP dipeptidase 2)	LVPNMTPEVVGEQVTSYLTK	12	99
46	spt|Q96KP4|CNDP2_HUMAN	Cytosolic nonspecific dipeptidase (Glutamate carboxypeptidase-like protein 1) (CNDP dipeptidase 2)	LYDDIDFDIEEFAK	3	99
46	spt|Q96KP4|CNDP2_HUMAN	Cytosolic nonspecific dipeptidase (Glutamate carboxypeptidase-like protein 1) (CNDP dipeptidase 2)	MLAAYLYEVSQLKD	2	99
46	spt|Q96KP4|CNDP2_HUMAN	Cytosolic nonspecific dipeptidase (Glutamate carboxypeptidase-like protein 1) (CNDP dipeptidase 2)	MMEVAAADVK	2	99
46	spt|Q96KP4|CNDP2_HUMAN	Cytosolic nonspecific dipeptidase (Glutamate carboxypeptidase-like protein 1) (CNDP dipeptidase 2)	NVMLLPVGSADDGAHSQNEK	8	99
46	spt|Q96KP4|CNDP2_HUMAN	Cytosolic nonspecific dipeptidase (Glutamate carboxypeptidase-like protein 1) (CNDP dipeptidase 2)	QKLPDGSEIPLPPILLGR	11	99
46	spt|Q96KP4|CNDP2_HUMAN	Cytosolic nonspecific dipeptidase (Glutamate carboxypeptidase-like protein 1) (CNDP dipeptidase 2)	QLGGSVELVDIGK	17	99
46	spt|Q96KP4|CNDP2_HUMAN	Cytosolic nonspecific dipeptidase (Glutamate carboxypeptidase-like protein 1) (CNDP dipeptidase 2)	TGQEIPVNVR	14	99
46	spt|Q96KP4|CNDP2_HUMAN	Cytosolic nonspecific dipeptidase (Glutamate carboxypeptidase-like protein 1) (CNDP dipeptidase 2)	TVFGVEPDLTR	17	99
46	spt|Q96KP4|CNDP2_HUMAN	Cytosolic nonspecific dipeptidase (Glutamate carboxypeptidase-like protein 1) (CNDP dipeptidase 2)	WVAIQSVSAWPEKR	2	99
46	spt|Q96KP4|CNDP2_HUMAN	Cytosolic nonspecific dipeptidase (Glutamate carboxypeptidase-like protein 1) (CNDP dipeptidase 2)	YIDENQDR	5	99
46	spt|Q96KP4|CNDP2_HUMAN	Cytosolic nonspecific dipeptidase (Glutamate carboxypeptidase-like protein 1) (CNDP dipeptidase 2)	PGINEAVAAVTEEEHK	1	98
46	spt|Q96KP4|CNDP2_HUMAN	Cytosolic nonspecific dipeptidase (Glutamate carboxypeptidase-like protein 1) (CNDP dipeptidase 2)	DVGAQILLHSHK	6	97
46	spt|Q96KP4|CNDP2_HUMAN	Cytosolic nonspecific dipeptidase (Glutamate carboxypeptidase-like protein 1) (CNDP dipeptidase 2)	AALTTLFK	18	96
47	spt|O43707|ACTN4_HUMAN	Alpha-actinin-4 (Non-muscle alpha-actinin 4) (F-actin cross-linking protein)	AGTQIENIDEDFR	6	99
47	spt|O43707|ACTN4_HUMAN	Alpha-actinin-4 (Non-muscle alpha-actinin 4) (F-actin cross-linking protein)	AGTQIENIDEDFRDGLK	7	99
47	spt|O43707|ACTN4_HUMAN	Alpha-actinin-4 (Non-muscle alpha-actinin 4) (F-actin cross-linking protein)	ALDFIASK	10	99
47	spt|O43707|ACTN4_HUMAN	Alpha-actinin-4 (Non-muscle alpha-actinin 4) (F-actin cross-linking protein)	CQLEINFNTLQTK	5	99
47	spt|O43707|ACTN4_HUMAN	Alpha-actinin-4 (Non-muscle alpha-actinin 4) (F-actin cross-linking protein)	DGLAFNALIHR	3	99
47	spt|O43707|ACTN4_HUMAN	Alpha-actinin-4 (Non-muscle alpha-actinin 4) (F-actin cross-linking protein)	EAILAIHK	2	99
47	spt|O43707|ACTN4_HUMAN	Alpha-actinin-4 (Non-muscle alpha-actinin 4) (F-actin cross-linking protein)	EGLLLWCQR	5	99
47	spt|O43707|ACTN4_HUMAN	Alpha-actinin-4 (Non-muscle alpha-actinin 4) (F-actin cross-linking protein)	ELPPDQAEYCIAR	13	99
47	spt|O43707|ACTN4_HUMAN	Alpha-actinin-4 (Non-muscle alpha-actinin 4) (F-actin cross-linking protein)	ETTDTDTADQVIASFK	8	99
47	spt|O43707|ACTN4_HUMAN	Alpha-actinin-4 (Non-muscle alpha-actinin 4) (F-actin cross-linking protein)	FAIQDISVEETSAK	3	99
47	spt|O43707|ACTN4_HUMAN	Alpha-actinin-4 (Non-muscle alpha-actinin 4) (F-actin cross-linking protein)	GISQEQMQEFR	8	99
47	spt|O43707|ACTN4_HUMAN	Alpha-actinin-4 (Non-muscle alpha-actinin 4) (F-actin cross-linking protein)	GYEEWLLNEIR	4	99
47	spt|O43707|ACTN4_HUMAN	Alpha-actinin-4 (Non-muscle alpha-actinin 4) (F-actin cross-linking protein)	ICDQWDALGSLTHSR	4	99
47	spt|O43707|ACTN4_HUMAN	Alpha-actinin-4 (Non-muscle alpha-actinin 4) (F-actin cross-linking protein)	ISIEMNGTLEDQLSHLK	9	99
47	spt|O43707|ACTN4_HUMAN	Alpha-actinin-4 (Non-muscle alpha-actinin 4) (F-actin cross-linking protein)	KDDPVTNLNNAFEVAEK	7	99
47	spt|O43707|ACTN4_HUMAN	Alpha-actinin-4 (Non-muscle alpha-actinin 4) (F-actin cross-linking protein)	LMLLLEVISGER	2	99
47	spt|O43707|ACTN4_HUMAN	Alpha-actinin-4 (Non-muscle alpha-actinin 4) (F-actin cross-linking protein)	LSGSNPYTTVTPQIINSK	9	99
47	spt|O43707|ACTN4_HUMAN	Alpha-actinin-4 (Non-muscle alpha-actinin 4) (F-actin cross-linking protein)	LSNRPAFMPSEGK	9	99
47	spt|O43707|ACTN4_HUMAN	Alpha-actinin-4 (Non-muscle alpha-actinin 4) (F-actin cross-linking protein)	MAPYQGPDAVPGALDYK	6	99
47	spt|O43707|ACTN4_HUMAN	Alpha-actinin-4 (Non-muscle alpha-actinin 4) (F-actin cross-linking protein)	MLDAEDIVNTARPDEK	8	99
47	spt|O43707|ACTN4_HUMAN	Alpha-actinin-4 (Non-muscle alpha-actinin 4) (F-actin cross-linking protein)	QFASQANVVGPWIQTK	9	99
47	spt|O43707|ACTN4_HUMAN	Alpha-actinin-4 (Non-muscle alpha-actinin 4) (F-actin cross-linking protein)	QLEAIDQLHLEYAK	6	99
47	spt|O43707|ACTN4_HUMAN	Alpha-actinin-4 (Non-muscle alpha-actinin 4) (F-actin cross-linking protein)	RDHALLEEQSK	6	99
47	spt|O43707|ACTN4_HUMAN	Alpha-actinin-4 (Non-muscle alpha-actinin 4) (F-actin cross-linking protein)	RELPPDQAEYCIAR	2	99
47	spt|O43707|ACTN4_HUMAN	Alpha-actinin-4 (Non-muscle alpha-actinin 4) (F-actin cross-linking protein)	SFSTALYGESDL	13	99
47	spt|O43707|ACTN4_HUMAN	Alpha-actinin-4 (Non-muscle alpha-actinin 4) (F-actin cross-linking protein)	STLPDADRER	5	99
47	spt|O43707|ACTN4_HUMAN	Alpha-actinin-4 (Non-muscle alpha-actinin 4) (F-actin cross-linking protein)	TINEVENQILTR	11	99
47	spt|O43707|ACTN4_HUMAN	Alpha-actinin-4 (Non-muscle alpha-actinin 4) (F-actin cross-linking protein)	VGWEQLLTTIAR	11	99
47	spt|O43707|ACTN4_HUMAN	Alpha-actinin-4 (Non-muscle alpha-actinin 4) (F-actin cross-linking protein)	VLAGDKNFITAEELR	6	99
47	spt|O43707|ACTN4_HUMAN	Alpha-actinin-4 (Non-muscle alpha-actinin 4) (F-actin cross-linking protein)	NFITAEELR	3	97
47	spt|O43707|ACTN4_HUMAN	Alpha-actinin-4 (Non-muscle alpha-actinin 4) (F-actin cross-linking protein)	VQQLVPK	7	96
48	trm|Q5TZY3|Q5TZY3_HUMAN	Glutathione S-transferase pi (GSTP1 protein)	AFLASPEYVNLPINGNGKQ	17	99
48	trm|Q5TZY3|Q5TZY3_HUMAN	Glutathione S-transferase pi (GSTP1 protein)	ALPGQLKPFETLLSQNQGGK	14	99
48	trm|Q5TZY3|Q5TZY3_HUMAN	Glutathione S-transferase pi (GSTP1 protein)	ASCLYGQLPK	14	99
48	trm|Q5TZY3|Q5TZY3_HUMAN	Glutathione S-transferase pi (GSTP1 protein)	DQQEAALVDMVNDGVEDLR	9	99
48	trm|Q5TZY3|Q5TZY3_HUMAN	Glutathione S-transferase pi (GSTP1 protein)	FQDGDLTLYQSNTILR	17	99
48	trm|Q5TZY3|Q5TZY3_HUMAN	Glutathione S-transferase pi (GSTP1 protein)	LKAFLASPEYVNLPINGNGKQ	3	99
48	trm|Q5TZY3|Q5TZY3_HUMAN	Glutathione S-transferase pi (GSTP1 protein)	MPPYTVVYFPVR	3	99
48	trm|Q5TZY3|Q5TZY3_HUMAN	Glutathione S-transferase pi (GSTP1 protein)	PPYTVVYFPVR	18	99
48	trm|Q5TZY3|Q5TZY3_HUMAN	Glutathione S-transferase pi (GSTP1 protein)	PPYTVVYFPVRGR	6	99
48	trm|Q5TZY3|Q5TZY3_HUMAN	Glutathione S-transferase pi (GSTP1 protein)	TLGLYGKDQQEAALVDMVNDGVEDLR	9	99
48	trm|Q5TZY3|Q5TZY3_HUMAN	Glutathione S-transferase pi (GSTP1 protein)	YISLIYTNYEAGKDDYVK	4	99
48	trm|Q5TZY3|Q5TZY3_HUMAN	Glutathione S-transferase pi (GSTP1 protein)	YTVVYFPVR	1	98
49	spt|P07237|PDIA1_HUMAN	Protein disulfide-isomerase precursor (EC 5.3.4.1) (PDI) (Prolyl 4- hydroxylase subunit beta) (Cellular thyroid hormone-binding protein) (p55)	ALAPEYAK	8	99
49	spt|P07237|PDIA1_HUMAN	Protein disulfide-isomerase precursor (EC 5.3.4.1) (PDI) (Prolyl 4- hydroxylase subunit beta) (Cellular thyroid hormone-binding protein) (p55)	DAPEEEDHVLVLR	13	99
49	spt|P07237|PDIA1_HUMAN	Protein disulfide-isomerase precursor (EC 5.3.4.1) (PDI) (Prolyl 4- hydroxylase subunit beta) (Cellular thyroid hormone-binding protein) (p55)	DVESDSAK	2	99
49	spt|P07237|PDIA1_HUMAN	Protein disulfide-isomerase precursor (EC 5.3.4.1) (PDI) (Prolyl 4- hydroxylase subunit beta) (Cellular thyroid hormone-binding protein) (p55)	EADDIVNWLK	13	99
49	spt|P07237|PDIA1_HUMAN	Protein disulfide-isomerase precursor (EC 5.3.4.1) (PDI) (Prolyl 4- hydroxylase subunit beta) (Cellular thyroid hormone-binding protein) (p55)	FFPASADR	16	99
49	spt|P07237|PDIA1_HUMAN	Protein disulfide-isomerase precursor (EC 5.3.4.1) (PDI) (Prolyl 4- hydroxylase subunit beta) (Cellular thyroid hormone-binding protein) (p55)	FFRNGDTASPK	9	99
49	spt|P07237|PDIA1_HUMAN	Protein disulfide-isomerase precursor (EC 5.3.4.1) (PDI) (Prolyl 4- hydroxylase subunit beta) (Cellular thyroid hormone-binding protein) (p55)	ILEFFGLK	4	99
49	spt|P07237|PDIA1_HUMAN	Protein disulfide-isomerase precursor (EC 5.3.4.1) (PDI) (Prolyl 4- hydroxylase subunit beta) (Cellular thyroid hormone-binding protein) (p55)	KSNFAEALAAHK	2	99
49	spt|P07237|PDIA1_HUMAN	Protein disulfide-isomerase precursor (EC 5.3.4.1) (PDI) (Prolyl 4- hydroxylase subunit beta) (Cellular thyroid hormone-binding protein) (p55)	LITLEEEMTK	12	99
49	spt|P07237|PDIA1_HUMAN	Protein disulfide-isomerase precursor (EC 5.3.4.1) (PDI) (Prolyl 4- hydroxylase subunit beta) (Cellular thyroid hormone-binding protein) (p55)	LKAEGSEIR	8	99
49	spt|P07237|PDIA1_HUMAN	Protein disulfide-isomerase precursor (EC 5.3.4.1) (PDI) (Prolyl 4- hydroxylase subunit beta) (Cellular thyroid hormone-binding protein) (p55)	MDSTANEVEAVK	9	99
49	spt|P07237|PDIA1_HUMAN	Protein disulfide-isomerase precursor (EC 5.3.4.1) (PDI) (Prolyl 4- hydroxylase subunit beta) (Cellular thyroid hormone-binding protein) (p55)	NNFEGEVTKENLLDFIK	5	99
49	spt|P07237|PDIA1_HUMAN	Protein disulfide-isomerase precursor (EC 5.3.4.1) (PDI) (Prolyl 4- hydroxylase subunit beta) (Cellular thyroid hormone-binding protein) (p55)	QFLQAAEAIDDIPFGITSNSDVFSK	11	99
49	spt|P07237|PDIA1_HUMAN	Protein disulfide-isomerase precursor (EC 5.3.4.1) (PDI) (Prolyl 4- hydroxylase subunit beta) (Cellular thyroid hormone-binding protein) (p55)	TVIDYNGER	13	99
49	spt|P07237|PDIA1_HUMAN	Protein disulfide-isomerase precursor (EC 5.3.4.1) (PDI) (Prolyl 4- hydroxylase subunit beta) (Cellular thyroid hormone-binding protein) (p55)	VDATEESDLAQQYGVR	17	99
49	spt|P07237|PDIA1_HUMAN	Protein disulfide-isomerase precursor (EC 5.3.4.1) (PDI) (Prolyl 4- hydroxylase subunit beta) (Cellular thyroid hormone-binding protein) (p55)	YKPESEELTAER	6	99
49	spt|P07237|PDIA1_HUMAN	Protein disulfide-isomerase precursor (EC 5.3.4.1) (PDI) (Prolyl 4- hydroxylase subunit beta) (Cellular thyroid hormone-binding protein) (p55)	YQLDKDGVVLFK	2	99
49	spt|P07237|PDIA1_HUMAN	Protein disulfide-isomerase precursor (EC 5.3.4.1) (PDI) (Prolyl 4- hydroxylase subunit beta) (Cellular thyroid hormone-binding protein) (p55)	ENLLDFIK	3	98
49	spt|P07237|PDIA1_HUMAN	Protein disulfide-isomerase precursor (EC 5.3.4.1) (PDI) (Prolyl 4- hydroxylase subunit beta) (Cellular thyroid hormone-binding protein) (p55)	HNQLPLVIEFTEQTAPK	5	98
49	spt|P07237|PDIA1_HUMAN	Protein disulfide-isomerase precursor (EC 5.3.4.1) (PDI) (Prolyl 4- hydroxylase subunit beta) (Cellular thyroid hormone-binding protein) (p55)	NFEDVAFDEKK	1	98
49	spt|P07237|PDIA1_HUMAN	Protein disulfide-isomerase precursor (EC 5.3.4.1) (PDI) (Prolyl 4- hydroxylase subunit beta) (Cellular thyroid hormone-binding protein) (p55)	SNFAEALAAHK	4	98
49	spt|P07237|PDIA1_HUMAN	Protein disulfide-isomerase precursor (EC 5.3.4.1) (PDI) (Prolyl 4- hydroxylase subunit beta) (Cellular thyroid hormone-binding protein) (p55)	DAPEEEDHVLVLRK	1	97
49	spt|P07237|PDIA1_HUMAN	Protein disulfide-isomerase precursor (EC 5.3.4.1) (PDI) (Prolyl 4- hydroxylase subunit beta) (Cellular thyroid hormone-binding protein) (p55)	SVSDYDGK	1	97
49	spt|P07237|PDIA1_HUMAN	Protein disulfide-isomerase precursor (EC 5.3.4.1) (PDI) (Prolyl 4- hydroxylase subunit beta) (Cellular thyroid hormone-binding protein) (p55)	TLDGFKK	11	97
49	spt|P07237|PDIA1_HUMAN	Protein disulfide-isomerase precursor (EC 5.3.4.1) (PDI) (Prolyl 4- hydroxylase subunit beta) (Cellular thyroid hormone-binding protein) (p55)	LAKVDATEESDLAQQYGVR	3	95
50	trm|Q38L19|Q38L19_HUMAN	Heat shock protein 60	ALMLQGVDLLADAVAVTMGPK	9	99
50	trm|Q38L19|Q38L19_HUMAN	Heat shock protein 60	CEFQDAYVLLSEK	6	99
50	trm|Q38L19|Q38L19_HUMAN	Heat shock protein 60	CIPALDSLTPANEDQK	8	99
50	trm|Q38L19|Q38L19_HUMAN	Heat shock protein 60	GANPVEIR	11	99
50	trm|Q38L19|Q38L19_HUMAN	Heat shock protein 60	GYISPYFINTSK	10	99
50	trm|Q38L19|Q38L19_HUMAN	Heat shock protein 60	IQEIIEQLDVTTSEYEK	9	99
50	trm|Q38L19|Q38L19_HUMAN	Heat shock protein 60	ISSIQSIVPALEIANAHR	10	99
50	trm|Q38L19|Q38L19_HUMAN	Heat shock protein 60	LSDGVAVLK	14	99
50	trm|Q38L19|Q38L19_HUMAN	Heat shock protein 60	LVQDVANNTNEEAGDGTTTATVLAR	17	99
50	trm|Q38L19|Q38L19_HUMAN	Heat shock protein 60	NAGVEGSLIVEK	9	99
50	trm|Q38L19|Q38L19_HUMAN	Heat shock protein 60	SIAKEGFEK	4	99
50	trm|Q38L19|Q38L19_HUMAN	Heat shock protein 60	TLKIPAMTIAK	1	99
50	trm|Q38L19|Q38L19_HUMAN	Heat shock protein 60	TLNDELEIIEGMK	10	99
50	trm|Q38L19|Q38L19_HUMAN	Heat shock protein 60	TVIIEQSWGSPK	9	99
50	trm|Q38L19|Q38L19_HUMAN	Heat shock protein 60	VGEVIVTK	3	99
50	trm|Q38L19|Q38L19_HUMAN	Heat shock protein 60	VGGTSDVEVNEK	14	99
50	trm|Q38L19|Q38L19_HUMAN	Heat shock protein 60	VGGTSDVEVNEKKDR	8	99
50	trm|Q38L19|Q38L19_HUMAN	Heat shock protein 60	VGLQVVAVK	4	99
50	trm|Q38L19|Q38L19_HUMAN	Heat shock protein 60	VTDALNATR	15	99
50	trm|Q38L19|Q38L19_HUMAN	Heat shock protein 60	VTKDGVTVAK	4	99
50	trm|Q38L19|Q38L19_HUMAN	Heat shock protein 60	GIIDPTKVVR	5	98
50	trm|Q38L19|Q38L19_HUMAN	Heat shock protein 60	DGVTVAK	8	97
50	trm|Q38L19|Q38L19_HUMAN	Heat shock protein 60	KISSIQSIVPALEIANAHR	2	96
50	trm|Q38L19|Q38L19_HUMAN	Heat shock protein 60	GIIDPTK	4	95
50	trm|Q38L19|Q38L19_HUMAN	Heat shock protein 60	IMQSSSEVGYDAMAGDFVNMVEK	6	95
51	spt|P08123|CO1A2_HUMAN	Collagen alpha-2(I) chain precursor	GAAGLPGVAGAPGLPGPR	4	99
51	spt|P08123|CO1A2_HUMAN	Collagen alpha-2(I) chain precursor	GAPGAVGAPGPAGATGDRGEAGAAGPAGPAGPR	4	99
51	spt|P08123|CO1A2_HUMAN	Collagen alpha-2(I) chain precursor	GETGPSGPVGPAGAVGPR	5	99
51	spt|P08123|CO1A2_HUMAN	Collagen alpha-2(I) chain precursor	GEVGPAGPNGFAGPAGAAGQPGAKGER	1	99
51	spt|P08123|CO1A2_HUMAN	Collagen alpha-2(I) chain precursor	GIPGPVGAAGATGAR	6	99
51	spt|P08123|CO1A2_HUMAN	Collagen alpha-2(I) chain precursor	GLHGEFGLPGPAGPR	2	99
51	spt|P08123|CO1A2_HUMAN	Collagen alpha-2(I) chain precursor	GLPGVAGAVGEPGPLGIAGPPGAR	6	99
51	spt|P08123|CO1A2_HUMAN	Collagen alpha-2(I) chain precursor	GPNGDAGRPGEPGLMGPR	4	99
51	spt|P08123|CO1A2_HUMAN	Collagen alpha-2(I) chain precursor	GPNGEAGSAGPPGPPGLR	3	99
51	spt|P08123|CO1A2_HUMAN	Collagen alpha-2(I) chain precursor	GPPGAAGAPGPQGFQGPAGEPGEPGQTGPAGAR	4	99
51	spt|P08123|CO1A2_HUMAN	Collagen alpha-2(I) chain precursor	GPPGAVGSPGVNGAPGEAGR	4	99
51	spt|P08123|CO1A2_HUMAN	Collagen alpha-2(I) chain precursor	GPPGESGAAGPTGPIGSR	4	99
51	spt|P08123|CO1A2_HUMAN	Collagen alpha-2(I) chain precursor	GVGLGPGPMGLMGPR	3	99
51	spt|P08123|CO1A2_HUMAN	Collagen alpha-2(I) chain precursor	GVVGPQGAR	3	99
51	spt|P08123|CO1A2_HUMAN	Collagen alpha-2(I) chain precursor	GYPGNIGPVGAAGAPGPHGPVGPAGK	2	99
51	spt|P08123|CO1A2_HUMAN	Collagen alpha-2(I) chain precursor	RGPNGEAGSAGPPGPPGLR	3	99
51	spt|P08123|CO1A2_HUMAN	Collagen alpha-2(I) chain precursor	TGHPGTVGPAGIR	2	99
51	spt|P08123|CO1A2_HUMAN	Collagen alpha-2(I) chain precursor	TGPPGPSGISGPPGPPGPAGK	4	99
51	spt|P08123|CO1A2_HUMAN	Collagen alpha-2(I) chain precursor	VGAPGPAGAR	4	99
51	spt|P08123|CO1A2_HUMAN	Collagen alpha-2(I) chain precursor	EGPVGLPGIDGR	1	97
51	spt|P08123|CO1A2_HUMAN	Collagen alpha-2(I) chain precursor	GLPGADGR	1	95
52	trm|Q6ZN40|Q6ZN40_HUMAN	"CDNA FLJ16459 fis, clone BRCAN2002473, moderately similar to Tropomyosin, fibroblast isoform 2 "	AEADVASLNR	12	99
52	trm|Q6ZN40|Q6ZN40_HUMAN	"CDNA FLJ16459 fis, clone BRCAN2002473, moderately similar to Tropomyosin, fibroblast isoform 2 "	AEADVASLNRR	6	99
52	trm|Q6ZN40|Q6ZN40_HUMAN	"CDNA FLJ16459 fis, clone BRCAN2002473, moderately similar to Tropomyosin, fibroblast isoform 2 "	AEDSLLAAEEAAAK	4	99
52	trm|Q6ZN40|Q6ZN40_HUMAN	"CDNA FLJ16459 fis, clone BRCAN2002473, moderately similar to Tropomyosin, fibroblast isoform 2 "	AEQAEADKK	2	99
52	trm|Q6ZN40|Q6ZN40_HUMAN	"CDNA FLJ16459 fis, clone BRCAN2002473, moderately similar to Tropomyosin, fibroblast isoform 2 "	AQKDEEKMEIQEIQLK	6	99
52	trm|Q6ZN40|Q6ZN40_HUMAN	"CDNA FLJ16459 fis, clone BRCAN2002473, moderately similar to Tropomyosin, fibroblast isoform 2 "	ATDAEADVASLNR	10	99
52	trm|Q6ZN40|Q6ZN40_HUMAN	"CDNA FLJ16459 fis, clone BRCAN2002473, moderately similar to Tropomyosin, fibroblast isoform 2 "	ATDAEADVASLNRR	6	99
52	trm|Q6ZN40|Q6ZN40_HUMAN	"CDNA FLJ16459 fis, clone BRCAN2002473, moderately similar to Tropomyosin, fibroblast isoform 2 "	CAELEEELK	7	99
52	trm|Q6ZN40|Q6ZN40_HUMAN	"CDNA FLJ16459 fis, clone BRCAN2002473, moderately similar to Tropomyosin, fibroblast isoform 2 "	CAELEEELKTVTNNLK	8	99
52	trm|Q6ZN40|Q6ZN40_HUMAN	"CDNA FLJ16459 fis, clone BRCAN2002473, moderately similar to Tropomyosin, fibroblast isoform 2 "	HIAEDADR	3	99
52	trm|Q6ZN40|Q6ZN40_HUMAN	"CDNA FLJ16459 fis, clone BRCAN2002473, moderately similar to Tropomyosin, fibroblast isoform 2 "	IQLVEEELDR	13	99
52	trm|Q6ZN40|Q6ZN40_HUMAN	"CDNA FLJ16459 fis, clone BRCAN2002473, moderately similar to Tropomyosin, fibroblast isoform 2 "	IQLVEEELDRAQER	8	99
52	trm|Q6ZN40|Q6ZN40_HUMAN	"CDNA FLJ16459 fis, clone BRCAN2002473, moderately similar to Tropomyosin, fibroblast isoform 2 "	KATDAEADVASLNR	10	99
52	trm|Q6ZN40|Q6ZN40_HUMAN	"CDNA FLJ16459 fis, clone BRCAN2002473, moderately similar to Tropomyosin, fibroblast isoform 2 "	KATDAEADVASLNRR	6	99
52	trm|Q6ZN40|Q6ZN40_HUMAN	"CDNA FLJ16459 fis, clone BRCAN2002473, moderately similar to Tropomyosin, fibroblast isoform 2 "	KLVIIESDLER	7	99
52	trm|Q6ZN40|Q6ZN40_HUMAN	"CDNA FLJ16459 fis, clone BRCAN2002473, moderately similar to Tropomyosin, fibroblast isoform 2 "	KLVIIESDLERAEER	5	99
52	trm|Q6ZN40|Q6ZN40_HUMAN	"CDNA FLJ16459 fis, clone BRCAN2002473, moderately similar to Tropomyosin, fibroblast isoform 2 "	LATALQKLEEAEK	7	99
52	trm|Q6ZN40|Q6ZN40_HUMAN	"CDNA FLJ16459 fis, clone BRCAN2002473, moderately similar to Tropomyosin, fibroblast isoform 2 "	LATALQKLEEAEKAADESER	2	99
52	trm|Q6ZN40|Q6ZN40_HUMAN	"CDNA FLJ16459 fis, clone BRCAN2002473, moderately similar to Tropomyosin, fibroblast isoform 2 "	LDKENALDR	9	99
52	trm|Q6ZN40|Q6ZN40_HUMAN	"CDNA FLJ16459 fis, clone BRCAN2002473, moderately similar to Tropomyosin, fibroblast isoform 2 "	LDKENALDRAEQAEADKK	2	99
52	trm|Q6ZN40|Q6ZN40_HUMAN	"CDNA FLJ16459 fis, clone BRCAN2002473, moderately similar to Tropomyosin, fibroblast isoform 2 "	LEEAEKAADESER	7	99
52	trm|Q6ZN40|Q6ZN40_HUMAN	"CDNA FLJ16459 fis, clone BRCAN2002473, moderately similar to Tropomyosin, fibroblast isoform 2 "	LVIIESDLER	4	99
52	trm|Q6ZN40|Q6ZN40_HUMAN	"CDNA FLJ16459 fis, clone BRCAN2002473, moderately similar to Tropomyosin, fibroblast isoform 2 "	MEIQEIQLK	5	99
52	trm|Q6ZN40|Q6ZN40_HUMAN	"CDNA FLJ16459 fis, clone BRCAN2002473, moderately similar to Tropomyosin, fibroblast isoform 2 "	QLEEDIAAK	11	99
52	trm|Q6ZN40|Q6ZN40_HUMAN	"CDNA FLJ16459 fis, clone BRCAN2002473, moderately similar to Tropomyosin, fibroblast isoform 2 "	RIQLVEEELDR	9	99
52	trm|Q6ZN40|Q6ZN40_HUMAN	"CDNA FLJ16459 fis, clone BRCAN2002473, moderately similar to Tropomyosin, fibroblast isoform 2 "	RIQLVEEELDRAQER	8	99
52	trm|Q6ZN40|Q6ZN40_HUMAN	"CDNA FLJ16459 fis, clone BRCAN2002473, moderately similar to Tropomyosin, fibroblast isoform 2 "	SIDDLEEK	9	99
52	trm|Q6ZN40|Q6ZN40_HUMAN	"CDNA FLJ16459 fis, clone BRCAN2002473, moderately similar to Tropomyosin, fibroblast isoform 2 "	SKQLEEDIAAK	8	99
52	trm|Q6ZN40|Q6ZN40_HUMAN	"CDNA FLJ16459 fis, clone BRCAN2002473, moderately similar to Tropomyosin, fibroblast isoform 2 "	YSQKEDRYEEEIK	3	99
52	trm|Q6ZN40|Q6ZN40_HUMAN	"CDNA FLJ16459 fis, clone BRCAN2002473, moderately similar to Tropomyosin, fibroblast isoform 2 "	EENLSMHQMLDQTLLELNNM	4	98
52	trm|Q6ZN40|Q6ZN40_HUMAN	"CDNA FLJ16459 fis, clone BRCAN2002473, moderately similar to Tropomyosin, fibroblast isoform 2 "	QLEEDIAAKEK	4	97
52	trm|Q6ZN40|Q6ZN40_HUMAN	"CDNA FLJ16459 fis, clone BRCAN2002473, moderately similar to Tropomyosin, fibroblast isoform 2 "	KYEEVAR	3	96
52	trm|Q6ZN40|Q6ZN40_HUMAN	"CDNA FLJ16459 fis, clone BRCAN2002473, moderately similar to Tropomyosin, fibroblast isoform 2 "	VLEELHK	3	96
52	trm|Q6ZN40|Q6ZN40_HUMAN	"CDNA FLJ16459 fis, clone BRCAN2002473, moderately similar to Tropomyosin, fibroblast isoform 2 "	LATALQK	12	95
53	trm|Q5JNX2|Q5JNX2_HUMAN	Complement component 4A	ALEILQEEDLIDEDDIPVR	7	99
53	trm|Q5JNX2|Q5JNX2_HUMAN	Complement component 4A	AVGSGATFSHYYYMILSR	3	99
53	trm|Q5JNX2|Q5JNX2_HUMAN	Complement component 4A	DHAVDLIQK	2	99
53	trm|Q5JNX2|Q5JNX2_HUMAN	Complement component 4A	EELVYELNPLDHR	3	99
53	trm|Q5JNX2|Q5JNX2_HUMAN	Complement component 4A	GLQDEDGYR	4	99
53	trm|Q5JNX2|Q5JNX2_HUMAN	Complement component 4A	ITQVLHFTK	3	99
53	trm|Q5JNX2|Q5JNX2_HUMAN	Complement component 4A	STQDTVIALDALSAYWIASHTTEER	1	99
53	trm|Q5JNX2|Q5JNX2_HUMAN	Complement component 4A	TLEIPGNSDPNMIPDGDFNSYVR	6	99
53	trm|Q5JNX2|Q5JNX2_HUMAN	Complement component 4A	TTNIQGINLLFSSR	2	99
53	trm|Q5JNX2|Q5JNX2_HUMAN	Complement component 4A	VGDTLNLNLR	10	99
53	trm|Q5JNX2|Q5JNX2_HUMAN	Complement component 4A	VTASDPLDTLGSEGALSPGGVASLLR	10	99
53	trm|Q5JNX2|Q5JNX2_HUMAN	Complement component 4A	LTVAAPPSGGPGFLSIERPDSRPPR	4	98
53	trm|Q5JNX2|Q5JNX2_HUMAN	Complement component 4A	VVEEQESR	2	98
53	trm|Q5JNX2|Q5JNX2_HUMAN	Complement component 4A	LVNGQSHISLSK	2	96
53	trm|Q5JNX2|Q5JNX2_HUMAN	Complement component 4A	VEYGFQVK	3	96
54	spt|Q06830|PRDX1_HUMAN	Peroxiredoxin-1 (EC 1.11.1.15) (Thioredoxin peroxidase 2) (Thioredoxin-dependent peroxide reductase 2) (Proliferation-associated protein PAG) (Natural killer cell-enhancing factor A) (NKEF-A)	ADEGISFR	12	99
54	spt|Q06830|PRDX1_HUMAN	Peroxiredoxin-1 (EC 1.11.1.15) (Thioredoxin peroxidase 2) (Thioredoxin-dependent peroxide reductase 2) (Proliferation-associated protein PAG) (Natural killer cell-enhancing factor A) (NKEF-A)	ATAVMPDGQFK	9	99
54	spt|Q06830|PRDX1_HUMAN	Peroxiredoxin-1 (EC 1.11.1.15) (Thioredoxin peroxidase 2) (Thioredoxin-dependent peroxide reductase 2) (Proliferation-associated protein PAG) (Natural killer cell-enhancing factor A) (NKEF-A)	GLFIIDDK	15	99
54	spt|Q06830|PRDX1_HUMAN	Peroxiredoxin-1 (EC 1.11.1.15) (Thioredoxin peroxidase 2) (Thioredoxin-dependent peroxide reductase 2) (Proliferation-associated protein PAG) (Natural killer cell-enhancing factor A) (NKEF-A)	GLFIIDDKGILR	4	99
54	spt|Q06830|PRDX1_HUMAN	Peroxiredoxin-1 (EC 1.11.1.15) (Thioredoxin peroxidase 2) (Thioredoxin-dependent peroxide reductase 2) (Proliferation-associated protein PAG) (Natural killer cell-enhancing factor A) (NKEF-A)	IGHPAPNFK	16	99
54	spt|Q06830|PRDX1_HUMAN	Peroxiredoxin-1 (EC 1.11.1.15) (Thioredoxin peroxidase 2) (Thioredoxin-dependent peroxide reductase 2) (Proliferation-associated protein PAG) (Natural killer cell-enhancing factor A) (NKEF-A)	KQGGLGPMNIPLVSDPKR	4	99
54	spt|Q06830|PRDX1_HUMAN	Peroxiredoxin-1 (EC 1.11.1.15) (Thioredoxin peroxidase 2) (Thioredoxin-dependent peroxide reductase 2) (Proliferation-associated protein PAG) (Natural killer cell-enhancing factor A) (NKEF-A)	LVQAFQFTDK	15	99
54	spt|Q06830|PRDX1_HUMAN	Peroxiredoxin-1 (EC 1.11.1.15) (Thioredoxin peroxidase 2) (Thioredoxin-dependent peroxide reductase 2) (Proliferation-associated protein PAG) (Natural killer cell-enhancing factor A) (NKEF-A)	QGGLGPMNIPLVSDPKR	8	99
54	spt|Q06830|PRDX1_HUMAN	Peroxiredoxin-1 (EC 1.11.1.15) (Thioredoxin peroxidase 2) (Thioredoxin-dependent peroxide reductase 2) (Proliferation-associated protein PAG) (Natural killer cell-enhancing factor A) (NKEF-A)	QITVNDLPVGR	19	99
54	spt|Q06830|PRDX1_HUMAN	Peroxiredoxin-1 (EC 1.11.1.15) (Thioredoxin peroxidase 2) (Thioredoxin-dependent peroxide reductase 2) (Proliferation-associated protein PAG) (Natural killer cell-enhancing factor A) (NKEF-A)	TIAQDYGVLK	16	99
54	spt|Q06830|PRDX1_HUMAN	Peroxiredoxin-1 (EC 1.11.1.15) (Thioredoxin peroxidase 2) (Thioredoxin-dependent peroxide reductase 2) (Proliferation-associated protein PAG) (Natural killer cell-enhancing factor A) (NKEF-A)	TIAQDYGVLKADEGISFR	4	99
54	spt|Q06830|PRDX1_HUMAN	Peroxiredoxin-1 (EC 1.11.1.15) (Thioredoxin peroxidase 2) (Thioredoxin-dependent peroxide reductase 2) (Proliferation-associated protein PAG) (Natural killer cell-enhancing factor A) (NKEF-A)	DISLSDYK	9	98
54	spt|Q06830|PRDX1_HUMAN	Peroxiredoxin-1 (EC 1.11.1.15) (Thioredoxin peroxidase 2) (Thioredoxin-dependent peroxide reductase 2) (Proliferation-associated protein PAG) (Natural killer cell-enhancing factor A) (NKEF-A)	SKEYFSK	13	98
55	spt|P05164|PERM_HUMAN	Myeloperoxidase precursor (EC 1.11.1.7) (MPO) [Contains: 89 kDa myeloperoxidase; 84 kDa myeloperoxidase; Myeloperoxidase light chain; Myeloperoxidase heavy chain]	FCGLPQPETVGQLGTVLR	1	99
55	spt|P05164|PERM_HUMAN	Myeloperoxidase precursor (EC 1.11.1.7) (MPO) [Contains: 89 kDa myeloperoxidase; 84 kDa myeloperoxidase; Myeloperoxidase light chain; Myeloperoxidase heavy chain]	IANVFTNAFR	2	99
55	spt|P05164|PERM_HUMAN	Myeloperoxidase precursor (EC 1.11.1.7) (MPO) [Contains: 89 kDa myeloperoxidase; 84 kDa myeloperoxidase; Myeloperoxidase light chain; Myeloperoxidase heavy chain]	IGLDLPALNMQR	1	99
55	spt|P05164|PERM_HUMAN	Myeloperoxidase precursor (EC 1.11.1.7) (MPO) [Contains: 89 kDa myeloperoxidase; 84 kDa myeloperoxidase; Myeloperoxidase light chain; Myeloperoxidase heavy chain]	QNQIAVDEIR	1	99
55	spt|P05164|PERM_HUMAN	Myeloperoxidase precursor (EC 1.11.1.7) (MPO) [Contains: 89 kDa myeloperoxidase; 84 kDa myeloperoxidase; Myeloperoxidase light chain; Myeloperoxidase heavy chain]	VVLEGGIDPILR	3	99
55	spt|P05164|PERM_HUMAN	Myeloperoxidase precursor (EC 1.11.1.7) (MPO) [Contains: 89 kDa myeloperoxidase; 84 kDa myeloperoxidase; Myeloperoxidase light chain; Myeloperoxidase heavy chain]	AVSNEIVR	2	98
55	spt|P05164|PERM_HUMAN	Myeloperoxidase precursor (EC 1.11.1.7) (MPO) [Contains: 89 kDa myeloperoxidase; 84 kDa myeloperoxidase; Myeloperoxidase light chain; Myeloperoxidase heavy chain]	IPCFLAGDTR	1	98
55	spt|P05164|PERM_HUMAN	Myeloperoxidase precursor (EC 1.11.1.7) (MPO) [Contains: 89 kDa myeloperoxidase; 84 kDa myeloperoxidase; Myeloperoxidase light chain; Myeloperoxidase heavy chain]	NQADCIPFFR	1	97
55	spt|P05164|PERM_HUMAN	Myeloperoxidase precursor (EC 1.11.1.7) (MPO) [Contains: 89 kDa myeloperoxidase; 84 kDa myeloperoxidase; Myeloperoxidase light chain; Myeloperoxidase heavy chain]	GLMATPAK	1	96
56	spt|P07339|CATD_HUMAN	Cathepsin D precursor (EC 3.4.23.5) [Contains: Cathepsin D light chain; Cathepsin D heavy chain]	AIGAVPLIQGEYMIPCEK	11	99
56	spt|P07339|CATD_HUMAN	Cathepsin D precursor (EC 3.4.23.5) [Contains: Cathepsin D light chain; Cathepsin D heavy chain]	FDGILGMAYPR	7	99
56	spt|P07339|CATD_HUMAN	Cathepsin D precursor (EC 3.4.23.5) [Contains: Cathepsin D light chain; Cathepsin D heavy chain]	ISVNNVLPVFDNLMQQK	10	99
56	spt|P07339|CATD_HUMAN	Cathepsin D precursor (EC 3.4.23.5) [Contains: Cathepsin D light chain; Cathepsin D heavy chain]	LSPEDYTLK	10	99
56	spt|P07339|CATD_HUMAN	Cathepsin D precursor (EC 3.4.23.5) [Contains: Cathepsin D light chain; Cathepsin D heavy chain]	QPGITFIAAK	6	99
56	spt|P07339|CATD_HUMAN	Cathepsin D precursor (EC 3.4.23.5) [Contains: Cathepsin D light chain; Cathepsin D heavy chain]	QVFGEATKQPGITFIAAK	7	99
56	spt|P07339|CATD_HUMAN	Cathepsin D precursor (EC 3.4.23.5) [Contains: Cathepsin D light chain; Cathepsin D heavy chain]	VGFAEAAR	5	99
56	spt|P07339|CATD_HUMAN	Cathepsin D precursor (EC 3.4.23.5) [Contains: Cathepsin D light chain; Cathepsin D heavy chain]	VSTLPAITLK	7	99
57	trm|Q8TCD0|Q8TCD0_HUMAN	Hypothetical protein	DVVMTQSPLSLPVTLGQPASISCR	1	99
57	trm|Q8TCD0|Q8TCD0_HUMAN	Hypothetical protein	FSGSGSGTDFTLK	2	99
57	trm|Q8TCD0|Q8TCD0_HUMAN	Hypothetical protein	SGTASVVCLLNNFYPR	1	99
57	trm|Q8TCD0|Q8TCD0_HUMAN	Hypothetical protein	TVAAPSVFIFPPSDEQLK	2	99
57	trm|Q8TCD0|Q8TCD0_HUMAN	Hypothetical protein	VDNALQSGNSQESVTEQDSK	2	99
57	trm|Q8TCD0|Q8TCD0_HUMAN	Hypothetical protein	VDNALQSGNSQESVTEQDSKDSTYSLSSTLTLSK	2	99
57	trm|Q8TCD0|Q8TCD0_HUMAN	Hypothetical protein	VYACEVTHQGLSSPVTK	2	99
57	trm|Q8TCD0|Q8TCD0_HUMAN	Hypothetical protein	PPSDEQLK	2	95
58	trm|Q6IPN6|Q6IPN6_HUMAN	Eukaryotic translation elongation factor 1 alpha 1	AAGAGKVTK	5	99
58	trm|Q6IPN6|Q6IPN6_HUMAN	Eukaryotic translation elongation factor 1 alpha 1	EHALLAYTLGVK	11	99
58	trm|Q6IPN6|Q6IPN6_HUMAN	Eukaryotic translation elongation factor 1 alpha 1	IGGIGTVPVGR	19	99
58	trm|Q6IPN6|Q6IPN6_HUMAN	Eukaryotic translation elongation factor 1 alpha 1	IGYNPDTVAFVPI	3	99
58	trm|Q6IPN6|Q6IPN6_HUMAN	Eukaryotic translation elongation factor 1 alpha 1	IGYNPDTVAFVPISGWNGDNMLEPSANMPWFK	4	99
58	trm|Q6IPN6|Q6IPN6_HUMAN	Eukaryotic translation elongation factor 1 alpha 1	LPLQDVYK	12	99
58	trm|Q6IPN6|Q6IPN6_HUMAN	Eukaryotic translation elongation factor 1 alpha 1	QLIVGVNK	9	99
58	trm|Q6IPN6|Q6IPN6_HUMAN	Eukaryotic translation elongation factor 1 alpha 1	QTVAVGVIK	19	99
58	trm|Q6IPN6|Q6IPN6_HUMAN	Eukaryotic translation elongation factor 1 alpha 1	SGDAAIVDMVPGKPMCVESF	2	99
58	trm|Q6IPN6|Q6IPN6_HUMAN	Eukaryotic translation elongation factor 1 alpha 1	SGDAAIVDMVPGKPMCVESFSDYPPLGR	11	99
58	trm|Q6IPN6|Q6IPN6_HUMAN	Eukaryotic translation elongation factor 1 alpha 1	STTTGHLIYK	13	99
58	trm|Q6IPN6|Q6IPN6_HUMAN	Eukaryotic translation elongation factor 1 alpha 1	TFAPVNVTTEVK	2	99
58	trm|Q6IPN6|Q6IPN6_HUMAN	Eukaryotic translation elongation factor 1 alpha 1	THINIVVIGHVDSGK	4	99
58	trm|Q6IPN6|Q6IPN6_HUMAN	Eukaryotic translation elongation factor 1 alpha 1	VETGVLKPGMVVTFAPVNVTTEVK	8	99
58	trm|Q6IPN6|Q6IPN6_HUMAN	Eukaryotic translation elongation factor 1 alpha 1	YYVTIIDAPGHR	4	99
58	trm|Q6IPN6|Q6IPN6_HUMAN	Eukaryotic translation elongation factor 1 alpha 1	EVSTYIK	6	98
58	trm|Q6IPN6|Q6IPN6_HUMAN	Eukaryotic translation elongation factor 1 alpha 1	SEALPGDNVGFNVK	2	98
58	trm|Q6IPN6|Q6IPN6_HUMAN	Eukaryotic translation elongation factor 1 alpha 1	PGDNVGFNVK	5	97
58	trm|Q6IPN6|Q6IPN6_HUMAN	Eukaryotic translation elongation factor 1 alpha 1	GSFKYAWVLDK	9	96
58	trm|Q6IPN6|Q6IPN6_HUMAN	Eukaryotic translation elongation factor 1 alpha 1	TIEKFEK	17	96
58	trm|Q6IPN6|Q6IPN6_HUMAN	Eukaryotic translation elongation factor 1 alpha 1	SVEMHHEALSEALPGDNVGFNVK	7	95
59	trm|Q6S377|Q6S377_HUMAN	Plectin 10	AAEEAEEAR	1	99
59	trm|Q6S377|Q6S377_HUMAN	Plectin 10	ALQALEELR	2	99
59	trm|Q6S377|Q6S377_HUMAN	Plectin 10	ELAEEAAR	1	99
59	trm|Q6S377|Q6S377_HUMAN	Plectin 10	GTQGAEEVLR	2	99
59	trm|Q6S377|Q6S377_HUMAN	Plectin 10	LVASMEEAR	1	99
59	trm|Q6S377|Q6S377_HUMAN	Plectin 10	VLALPEPSPAAPTLR	1	99
60	trm|Q8NF12|Q8NF12_HUMAN	FLJ00390 protein (Fragment)	ALRPPMSQAR	9	99
60	trm|Q8NF12|Q8NF12_HUMAN	FLJ00390 protein (Fragment)	EAVIAAAFAK	12	99
60	trm|Q8NF12|Q8NF12_HUMAN	FLJ00390 protein (Fragment)	GASGIQGLAR	18	99
60	trm|Q8NF12|Q8NF12_HUMAN	FLJ00390 protein (Fragment)	LDRSGDGVVTVDDLR	9	99
60	trm|Q8NF12|Q8NF12_HUMAN	FLJ00390 protein (Fragment)	LGLVLDQAEAEGVCR	14	99
60	trm|Q8NF12|Q8NF12_HUMAN	FLJ00390 protein (Fragment)	MDAVDATMEK	16	99
60	trm|Q8NF12|Q8NF12_HUMAN	FLJ00390 protein (Fragment)	NGSGTLDLEEFLR	9	99
60	trm|Q8NF12|Q8NF12_HUMAN	FLJ00390 protein (Fragment)	SGDGVVTVDDLR	19	99
60	trm|Q8NF12|Q8NF12_HUMAN	FLJ00390 protein (Fragment)	SGEWTEDEVLR	7	99
60	trm|Q8NF12|Q8NF12_HUMAN	FLJ00390 protein (Fragment)	SGEWTEDEVLRR	4	99
60	trm|Q8NF12|Q8NF12_HUMAN	FLJ00390 protein (Fragment)	SLDADEFR	13	99
60	trm|Q8NF12|Q8NF12_HUMAN	FLJ00390 protein (Fragment)	SLDADEFRQGLAK	9	99
60	trm|Q8NF12|Q8NF12_HUMAN	FLJ00390 protein (Fragment)	MDAVDATMEKLR	4	96
61	trm|Q6ZSH5|Q6ZSH5_HUMAN	"CDNA FLJ45525 fis, clone BRTHA2026311, highly similar to Protein disulfide isomerase A6 (EC 5.3.4.1) "	ALDLFSDNAPPPELLEIINEDIAK	5	99
61	trm|Q6ZSH5|Q6ZSH5_HUMAN	"CDNA FLJ45525 fis, clone BRTHA2026311, highly similar to Protein disulfide isomerase A6 (EC 5.3.4.1) "	DGELPVEDDIDLSDVELDDLGKDEL	9	99
61	trm|Q6ZSH5|Q6ZSH5_HUMAN	"CDNA FLJ45525 fis, clone BRTHA2026311, highly similar to Protein disulfide isomerase A6 (EC 5.3.4.1) "	GESPVDYDGGR	8	99
61	trm|Q6ZSH5|Q6ZSH5_HUMAN	"CDNA FLJ45525 fis, clone BRTHA2026311, highly similar to Protein disulfide isomerase A6 (EC 5.3.4.1) "	GSFSEQGINEFLR	10	99
61	trm|Q6ZSH5|Q6ZSH5_HUMAN	"CDNA FLJ45525 fis, clone BRTHA2026311, highly similar to Protein disulfide isomerase A6 (EC 5.3.4.1) "	GSTAPVGGGAFPTIVER	10	99
61	trm|Q6ZSH5|Q6ZSH5_HUMAN	"CDNA FLJ45525 fis, clone BRTHA2026311, highly similar to Protein disulfide isomerase A6 (EC 5.3.4.1) "	GSTAPVGGGAFPTIVEREPWDGR	5	99
61	trm|Q6ZSH5|Q6ZSH5_HUMAN	"CDNA FLJ45525 fis, clone BRTHA2026311, highly similar to Protein disulfide isomerase A6 (EC 5.3.4.1) "	IFQKGESPVDYDGGR	5	99
61	trm|Q6ZSH5|Q6ZSH5_HUMAN	"CDNA FLJ45525 fis, clone BRTHA2026311, highly similar to Protein disulfide isomerase A6 (EC 5.3.4.1) "	LAAVDATVNQVLASR	14	99
61	trm|Q6ZSH5|Q6ZSH5_HUMAN	"CDNA FLJ45525 fis, clone BRTHA2026311, highly similar to Protein disulfide isomerase A6 (EC 5.3.4.1) "	LYSSSDDVIELTPSNFNR	6	99
61	trm|Q6ZSH5|Q6ZSH5_HUMAN	"CDNA FLJ45525 fis, clone BRTHA2026311, highly similar to Protein disulfide isomerase A6 (EC 5.3.4.1) "	NLEPEWAAAASEVK	7	99
61	trm|Q6ZSH5|Q6ZSH5_HUMAN	"CDNA FLJ45525 fis, clone BRTHA2026311, highly similar to Protein disulfide isomerase A6 (EC 5.3.4.1) "	NLEPEWAAAASEVKEQTK	6	99
61	trm|Q6ZSH5|Q6ZSH5_HUMAN	"CDNA FLJ45525 fis, clone BRTHA2026311, highly similar to Protein disulfide isomerase A6 (EC 5.3.4.1) "	TGEAIVDAALSALR	12	99
62	trm|Q5U077|Q5U077_HUMAN	Lactate dehydrogenase B (Transformation-related protein 5)	GLTSVINQK	15	99
62	trm|Q5U077|Q5U077_HUMAN	Lactate dehydrogenase B (Transformation-related protein 5)	IHPVSTMVK	5	99
62	trm|Q5U077|Q5U077_HUMAN	Lactate dehydrogenase B (Transformation-related protein 5)	IVADKDYSVTANSK	9	99
62	trm|Q5U077|Q5U077_HUMAN	Lactate dehydrogenase B (Transformation-related protein 5)	IVVVTAGVR	19	99
62	trm|Q5U077|Q5U077_HUMAN	Lactate dehydrogenase B (Transformation-related protein 5)	LIAPVAEEEATVPNNK	9	99
62	trm|Q5U077|Q5U077_HUMAN	Lactate dehydrogenase B (Transformation-related protein 5)	LKDDEVAQLK	11	99
62	trm|Q5U077|Q5U077_HUMAN	Lactate dehydrogenase B (Transformation-related protein 5)	LKDDEVAQLKK	8	99
62	trm|Q5U077|Q5U077_HUMAN	Lactate dehydrogenase B (Transformation-related protein 5)	MVVESAYEVIK	7	99
62	trm|Q5U077|Q5U077_HUMAN	Lactate dehydrogenase B (Transformation-related protein 5)	QQEGESRLNLVQR	9	99
62	trm|Q5U077|Q5U077_HUMAN	Lactate dehydrogenase B (Transformation-related protein 5)	SADTLWDIQK	12	99
62	trm|Q5U077|Q5U077_HUMAN	Lactate dehydrogenase B (Transformation-related protein 5)	SLADELALVDVLEDK	11	99
62	trm|Q5U077|Q5U077_HUMAN	Lactate dehydrogenase B (Transformation-related protein 5)	VIGSGCNLDSAR	16	99
62	trm|Q5U077|Q5U077_HUMAN	Lactate dehydrogenase B (Transformation-related protein 5)	FIIPQIVK	6	98
63	spt|Q15365|PCBP1_HUMAN	Poly(rC)-binding protein 1 (Alpha-CP1) (hnRNP-E1) (Nucleic acid- binding protein SUB2.3)	ESTGAQVQVAGDMLPNSTER	13	99
63	spt|Q15365|PCBP1_HUMAN	Poly(rC)-binding protein 1 (Alpha-CP1) (hnRNP-E1) (Nucleic acid- binding protein SUB2.3)	EVGSIIGK	2	99
63	spt|Q15365|PCBP1_HUMAN	Poly(rC)-binding protein 1 (Alpha-CP1) (hnRNP-E1) (Nucleic acid- binding protein SUB2.3)	IANPVEGSSGR	9	99
63	spt|Q15365|PCBP1_HUMAN	Poly(rC)-binding protein 1 (Alpha-CP1) (hnRNP-E1) (Nucleic acid- binding protein SUB2.3)	IITLTGPTNAIFK	6	99
63	spt|Q15365|PCBP1_HUMAN	Poly(rC)-binding protein 1 (Alpha-CP1) (hnRNP-E1) (Nucleic acid- binding protein SUB2.3)	INISEGNCPER	8	99
63	spt|Q15365|PCBP1_HUMAN	Poly(rC)-binding protein 1 (Alpha-CP1) (hnRNP-E1) (Nucleic acid- binding protein SUB2.3)	LVVPATQCGSLIGK	7	99
63	spt|Q15365|PCBP1_HUMAN	Poly(rC)-binding protein 1 (Alpha-CP1) (hnRNP-E1) (Nucleic acid- binding protein SUB2.3)	STAASRPPVTLR	1	99
63	spt|Q15365|PCBP1_HUMAN	Poly(rC)-binding protein 1 (Alpha-CP1) (hnRNP-E1) (Nucleic acid- binding protein SUB2.3)	VMTIPYQPMPASSPVICAGGQDR	8	99
64	trm|Q6FI10|Q6FI10_HUMAN	Fructose-bisphosphate aldolase	AAQEEYVKR	6	99
64	trm|Q6FI10|Q6FI10_HUMAN	Fructose-bisphosphate aldolase	ADDGRPFPQVIK	16	99
64	trm|Q6FI10|Q6FI10_HUMAN	Fructose-bisphosphate aldolase	ALANSLACQGK	10	99
64	trm|Q6FI10|Q6FI10_HUMAN	Fructose-bisphosphate aldolase	ALQASALK	10	99
64	trm|Q6FI10|Q6FI10_HUMAN	Fructose-bisphosphate aldolase	CPLLKPWALTF	1	99
64	trm|Q6FI10|Q6FI10_HUMAN	Fructose-bisphosphate aldolase	ELSDIAHR	6	99
64	trm|Q6FI10|Q6FI10_HUMAN	Fructose-bisphosphate aldolase	FSHEEIAMATVTALR	7	99
64	trm|Q6FI10|Q6FI10_HUMAN	Fructose-bisphosphate aldolase	GILAADESTGSIAK	17	99
64	trm|Q6FI10|Q6FI10_HUMAN	Fructose-bisphosphate aldolase	GILAADESTGSIAKR	8	99
64	trm|Q6FI10|Q6FI10_HUMAN	Fructose-bisphosphate aldolase	GVVPLAGTNGETTTQGLDGLSER	20	99
64	trm|Q6FI10|Q6FI10_HUMAN	Fructose-bisphosphate aldolase	IGEHTPSALAIMENANVLAR	14	99
64	trm|Q6FI10|Q6FI10_HUMAN	Fructose-bisphosphate aldolase	IVAPGKGILAADESTGSIAK	8	99
64	trm|Q6FI10|Q6FI10_HUMAN	Fructose-bisphosphate aldolase	IVAPGKGILAADESTGSIAKR	1	99
64	trm|Q6FI10|Q6FI10_HUMAN	Fructose-bisphosphate aldolase	KDGADFAK	3	99
64	trm|Q6FI10|Q6FI10_HUMAN	Fructose-bisphosphate aldolase	LQSIGTENTEENR	10	99
64	trm|Q6FI10|Q6FI10_HUMAN	Fructose-bisphosphate aldolase	LQSIGTENTEENRR	11	99
64	trm|Q6FI10|Q6FI10_HUMAN	Fructose-bisphosphate aldolase	PYQYPALTPEQK	8	99
64	trm|Q6FI10|Q6FI10_HUMAN	Fructose-bisphosphate aldolase	QLLLTADDR	8	99
64	trm|Q6FI10|Q6FI10_HUMAN	Fructose-bisphosphate aldolase	RLQSIGTENTEENRR	7	99
64	trm|Q6FI10|Q6FI10_HUMAN	Fructose-bisphosphate aldolase	TVPPAVTGITFLSGGQSEEEASINLNAINK	5	99
64	trm|Q6FI10|Q6FI10_HUMAN	Fructose-bisphosphate aldolase	VDKGVVPLAGTNGETTTQGLDGLSER	13	99
64	trm|Q6FI10|Q6FI10_HUMAN	Fructose-bisphosphate aldolase	YASICQQNGIVPIVEPEILPDGDHDLK	2	99
64	trm|Q6FI10|Q6FI10_HUMAN	Fructose-bisphosphate aldolase	YTPSGQAGAAASESLFVSNHAY	10	99
64	trm|Q6FI10|Q6FI10_HUMAN	Fructose-bisphosphate aldolase	DGADFAK	9	98
64	trm|Q6FI10|Q6FI10_HUMAN	Fructose-bisphosphate aldolase	PYQYPALTPEQKK	9	98
64	trm|Q6FI10|Q6FI10_HUMAN	Fructose-bisphosphate aldolase	RLQSIGTENTEENR	3	98
64	trm|Q6FI10|Q6FI10_HUMAN	Fructose-bisphosphate aldolase	FSHEEIAMATVTALRR	4	96
65	spt|P25705|ATPA_HUMAN	"ATP synthase subunit alpha, mitochondrial precursor (EC 3.6.3.14) "	AVDSLVPIGR	16	99
65	spt|P25705|ATPA_HUMAN	"ATP synthase subunit alpha, mitochondrial precursor (EC 3.6.3.14) "	EAYPGDVFYLHSR	7	99
65	spt|P25705|ATPA_HUMAN	"ATP synthase subunit alpha, mitochondrial precursor (EC 3.6.3.14) "	EVAAFAQFGSDLDAATQQLLSR	10	99
65	spt|P25705|ATPA_HUMAN	"ATP synthase subunit alpha, mitochondrial precursor (EC 3.6.3.14) "	ILGADTSVDLEETGR	13	99
65	spt|P25705|ATPA_HUMAN	"ATP synthase subunit alpha, mitochondrial precursor (EC 3.6.3.14) "	NVQAEEMVEFSSGLK	8	99
65	spt|P25705|ATPA_HUMAN	"ATP synthase subunit alpha, mitochondrial precursor (EC 3.6.3.14) "	QKTGTAEMSSILEER	2	99
65	spt|P25705|ATPA_HUMAN	"ATP synthase subunit alpha, mitochondrial precursor (EC 3.6.3.14) "	TGAIVDVPVGEELLGR	17	99
65	spt|P25705|ATPA_HUMAN	"ATP synthase subunit alpha, mitochondrial precursor (EC 3.6.3.14) "	TGTAEMSSILEER	11	99
65	spt|P25705|ATPA_HUMAN	"ATP synthase subunit alpha, mitochondrial precursor (EC 3.6.3.14) "	VLSIGDGIAR	13	99
65	spt|P25705|ATPA_HUMAN	"ATP synthase subunit alpha, mitochondrial precursor (EC 3.6.3.14) "	VVDALGNAIDGKGPIGSK	8	98
65	spt|P25705|ATPA_HUMAN	"ATP synthase subunit alpha, mitochondrial precursor (EC 3.6.3.14) "	LELAQYR	6	97
65	spt|P25705|ATPA_HUMAN	"ATP synthase subunit alpha, mitochondrial precursor (EC 3.6.3.14) "	GMSLNLEPDNVGVVVFGNDK	4	95
66	trm|Q53HU0|Q53HU0_HUMAN	"Chaperonin containing TCP1, subunit 8 (Theta) variant (Fragment) "	AVDDGVNTFK	3	99
66	trm|Q53HU0|Q53HU0_HUMAN	"Chaperonin containing TCP1, subunit 8 (Theta) variant (Fragment) "	DIDEVSSLLR	8	99
66	trm|Q53HU0|Q53HU0_HUMAN	"Chaperonin containing TCP1, subunit 8 (Theta) variant (Fragment) "	DMLEAGILDTYLGK	5	99
66	trm|Q53HU0|Q53HU0_HUMAN	"Chaperonin containing TCP1, subunit 8 (Theta) variant (Fragment) "	ELEVQHPAAK	5	99
66	trm|Q53HU0|Q53HU0_HUMAN	"Chaperonin containing TCP1, subunit 8 (Theta) variant (Fragment) "	FAEAFEAIPR	6	99
66	trm|Q53HU0|Q53HU0_HUMAN	"Chaperonin containing TCP1, subunit 8 (Theta) variant (Fragment) "	IAVYSCPFDGMITETK	4	99
66	trm|Q53HU0|Q53HU0_HUMAN	"Chaperonin containing TCP1, subunit 8 (Theta) variant (Fragment) "	LATNAAVTVLR	7	99
66	trm|Q53HU0|Q53HU0_HUMAN	"Chaperonin containing TCP1, subunit 8 (Theta) variant (Fragment) "	LFVTNDAATILR	10	99
66	trm|Q53HU0|Q53HU0_HUMAN	"Chaperonin containing TCP1, subunit 8 (Theta) variant (Fragment) "	LVPGGGATEIELAK	4	99
66	trm|Q53HU0|Q53HU0_HUMAN	"Chaperonin containing TCP1, subunit 8 (Theta) variant (Fragment) "	QITSYGETCPGLEQYAIK	3	99
66	trm|Q53HU0|Q53HU0_HUMAN	"Chaperonin containing TCP1, subunit 8 (Theta) variant (Fragment) "	TVGATALPR	9	99
66	trm|Q53HU0|Q53HU0_HUMAN	"Chaperonin containing TCP1, subunit 8 (Theta) variant (Fragment) "	ALAENSGVK	5	98
67	spt|P11586|C1TC_HUMAN	"C-1-tetrahydrofolate synthase, cytoplasmic (C1-THF synthase) [Includes: Methylenetetrahydrofolate dehydrogenase (EC 1.5.1.5); Methenyltetrahydrofolate cyclohydrolase (EC 3.5.4.9); Formyltetrahydrofolate synthetase (EC 6.3.4.3)] "	ETGVPIAGR	2	99
67	spt|P11586|C1TC_HUMAN	"C-1-tetrahydrofolate synthase, cytoplasmic (C1-THF synthase) [Includes: Methylenetetrahydrofolate dehydrogenase (EC 1.5.1.5); Methenyltetrahydrofolate cyclohydrolase (EC 3.5.4.9); Formyltetrahydrofolate synthetase (EC 6.3.4.3)] "	GALALAQAVQR	4	99
67	spt|P11586|C1TC_HUMAN	"C-1-tetrahydrofolate synthase, cytoplasmic (C1-THF synthase) [Includes: Methylenetetrahydrofolate dehydrogenase (EC 1.5.1.5); Methenyltetrahydrofolate cyclohydrolase (EC 3.5.4.9); Formyltetrahydrofolate synthetase (EC 6.3.4.3)] "	GVPTGFILPIR	4	99
67	spt|P11586|C1TC_HUMAN	"C-1-tetrahydrofolate synthase, cytoplasmic (C1-THF synthase) [Includes: Methylenetetrahydrofolate dehydrogenase (EC 1.5.1.5); Methenyltetrahydrofolate cyclohydrolase (EC 3.5.4.9); Formyltetrahydrofolate synthetase (EC 6.3.4.3)] "	LDIDPETITWQR	3	99
67	spt|P11586|C1TC_HUMAN	"C-1-tetrahydrofolate synthase, cytoplasmic (C1-THF synthase) [Includes: Methylenetetrahydrofolate dehydrogenase (EC 1.5.1.5); Methenyltetrahydrofolate cyclohydrolase (EC 3.5.4.9); Formyltetrahydrofolate synthetase (EC 6.3.4.3)] "	TDTESELDLISR	1	99
67	spt|P11586|C1TC_HUMAN	"C-1-tetrahydrofolate synthase, cytoplasmic (C1-THF synthase) [Includes: Methylenetetrahydrofolate dehydrogenase (EC 1.5.1.5); Methenyltetrahydrofolate cyclohydrolase (EC 3.5.4.9); Formyltetrahydrofolate synthetase (EC 6.3.4.3)] "	VLLSALER	3	99
67	spt|P11586|C1TC_HUMAN	"C-1-tetrahydrofolate synthase, cytoplasmic (C1-THF synthase) [Includes: Methylenetetrahydrofolate dehydrogenase (EC 1.5.1.5); Methenyltetrahydrofolate cyclohydrolase (EC 3.5.4.9); Formyltetrahydrofolate synthetase (EC 6.3.4.3)] "	YVVVTGITPTPLGEGK	2	99
68	trm|Q5TCG3|Q5TCG3_HUMAN	OTTHUMP00000016816	ATEHVNGNGTEEPMDTTSAVIHSENFQTLLDAGLPQK	1	99
68	trm|Q5TCG3|Q5TCG3_HUMAN	OTTHUMP00000016816	DLFEDELVPLFEK	3	99
68	trm|Q5TCG3|Q5TCG3_HUMAN	OTTHUMP00000016816	NLANTVTEEILEK	1	99
68	trm|Q5TCG3|Q5TCG3_HUMAN	OTTHUMP00000016816	TGYTLDVTTGQR	2	99
68	trm|Q5TCG3|Q5TCG3_HUMAN	OTTHUMP00000016816	VWGNVGTVEWADPIEDPDPEVMAK	1	99
68	trm|Q5TCG3|Q5TCG3_HUMAN	OTTHUMP00000016816	EFNEDGALAVLQQFK	1	96
69	spt|P07737|PROF1_HUMAN	Profilin-1 (Profilin I)	DSLLQDGEFSMDLR	18	99
69	spt|P07737|PROF1_HUMAN	Profilin-1 (Profilin I)	DSPSVWAAVPGK	7	99
69	spt|P07737|PROF1_HUMAN	Profilin-1 (Profilin I)	EGVHGGLINK	3	99
69	spt|P07737|PROF1_HUMAN	Profilin-1 (Profilin I)	NITPAEVGVLVGK	1	99
69	spt|P07737|PROF1_HUMAN	Profilin-1 (Profilin I)	PAEVGVLVGK	1	99
69	spt|P07737|PROF1_HUMAN	Profilin-1 (Profilin I)	SSFYVNGLTLGGQK	18	99
69	spt|P07737|PROF1_HUMAN	Profilin-1 (Profilin I)	STGGAPTFNVTVTK	8	99
69	spt|P07737|PROF1_HUMAN	Profilin-1 (Profilin I)	TDKTLVLLMGK	3	99
69	spt|P07737|PROF1_HUMAN	Profilin-1 (Profilin I)	TFVNITPAEVGVLVGK	12	99
69	spt|P07737|PROF1_HUMAN	Profilin-1 (Profilin I)	TFVNITPAEVGVLVGKDR	10	99
69	spt|P07737|PROF1_HUMAN	Profilin-1 (Profilin I)	TLVLLMGK	7	98
70	trm|Q53QP9|Q53QP9_HUMAN	"Hypothetical protein CCT4 (Chaperonin containing TCP1, subunit 4) (Delta) "	AFADAMEVIPSTLAENAGLNPISTVTELR	3	99
70	trm|Q53QP9|Q53QP9_HUMAN	"Hypothetical protein CCT4 (Chaperonin containing TCP1, subunit 4) (Delta) "	ALIAGGGAPEIELALR	5	99
70	trm|Q53QP9|Q53QP9_HUMAN	"Hypothetical protein CCT4 (Chaperonin containing TCP1, subunit 4) (Delta) "	DALSDLALHFLNK	4	99
70	trm|Q53QP9|Q53QP9_HUMAN	"Hypothetical protein CCT4 (Chaperonin containing TCP1, subunit 4) (Delta) "	FSNISAAK	6	99
70	trm|Q53QP9|Q53QP9_HUMAN	"Hypothetical protein CCT4 (Chaperonin containing TCP1, subunit 4) (Delta) "	PATATSVDLR	2	99
70	trm|Q53QP9|Q53QP9_HUMAN	"Hypothetical protein CCT4 (Chaperonin containing TCP1, subunit 4) (Delta) "	QMQVLHPAAR	13	99
70	trm|Q53QP9|Q53QP9_HUMAN	"Hypothetical protein CCT4 (Chaperonin containing TCP1, subunit 4) (Delta) "	VIDPATATSVDLR	11	99
70	trm|Q53QP9|Q53QP9_HUMAN	"Hypothetical protein CCT4 (Chaperonin containing TCP1, subunit 4) (Delta) "	VSNSGITR	6	99
70	trm|Q53QP9|Q53QP9_HUMAN	"Hypothetical protein CCT4 (Chaperonin containing TCP1, subunit 4) (Delta) "	VVSQYSSLLSPMSVNAVMK	3	99
70	trm|Q53QP9|Q53QP9_HUMAN	"Hypothetical protein CCT4 (Chaperonin containing TCP1, subunit 4) (Delta) "	IDDVVNTR	5	98
70	trm|Q53QP9|Q53QP9_HUMAN	"Hypothetical protein CCT4 (Chaperonin containing TCP1, subunit 4) (Delta) "	SGATAGAAGGRGK	8	98
70	trm|Q53QP9|Q53QP9_HUMAN	"Hypothetical protein CCT4 (Chaperonin containing TCP1, subunit 4) (Delta) "	LVIEEAER	7	97
71	trm|Q6N0B3|Q6N0B3_HUMAN	Hypothetical protein DKFZp686P03159	AEDGSVIDYELIDQDAR	7	99
71	trm|Q6N0B3|Q6N0B3_HUMAN	Hypothetical protein DKFZp686P03159	ALLYLCGGDD	12	99
71	trm|Q6N0B3|Q6N0B3_HUMAN	Hypothetical protein DKFZp686P03159	AYTNFDAER	6	99
71	trm|Q6N0B3|Q6N0B3_HUMAN	Hypothetical protein DKFZp686P03159	GVDEVTIVNILTNR	11	99
71	trm|Q6N0B3|Q6N0B3_HUMAN	Hypothetical protein DKFZp686P03159	LSLEGDHSTPPSAYGSVK	7	99
71	trm|Q6N0B3|Q6N0B3_HUMAN	Hypothetical protein DKFZp686P03159	QDIAFAYQR	4	99
71	trm|Q6N0B3|Q6N0B3_HUMAN	Hypothetical protein DKFZp686P03159	RAEDGSVIDYELIDQDAR	7	99
71	trm|Q6N0B3|Q6N0B3_HUMAN	Hypothetical protein DKFZp686P03159	STVHEILCK	4	99
71	trm|Q6N0B3|Q6N0B3_HUMAN	Hypothetical protein DKFZp686P03159	TDLEKDIISDTSGDFR	2	99
71	trm|Q6N0B3|Q6N0B3_HUMAN	Hypothetical protein DKFZp686P03159	TNQELQEINR	10	99
71	trm|Q6N0B3|Q6N0B3_HUMAN	Hypothetical protein DKFZp686P03159	WISIMTER	6	99
72	spt|P26038|MOES_HUMAN	Moesin (Membrane-organizing extension spike protein)	ALELEQER	14	99
72	spt|P26038|MOES_HUMAN	Moesin (Membrane-organizing extension spike protein)	ALTSELANAR	14	99
72	spt|P26038|MOES_HUMAN	Moesin (Membrane-organizing extension spike protein)	ALTSELANARDESK	7	99
72	spt|P26038|MOES_HUMAN	Moesin (Membrane-organizing extension spike protein)	APDFVFYAPR	14	99
72	spt|P26038|MOES_HUMAN	Moesin (Membrane-organizing extension spike protein)	AQQELEEQTR	5	99
72	spt|P26038|MOES_HUMAN	Moesin (Membrane-organizing extension spike protein)	EALLQASR	7	99
72	spt|P26038|MOES_HUMAN	Moesin (Membrane-organizing extension spike protein)	EVWFFGLQYQDTK	2	99
72	spt|P26038|MOES_HUMAN	Moesin (Membrane-organizing extension spike protein)	FYPEDVSEELIQDITQR	5	99
72	spt|P26038|MOES_HUMAN	Moesin (Membrane-organizing extension spike protein)	IAQDLEMYGVNYFSIK	3	99
72	spt|P26038|MOES_HUMAN	Moesin (Membrane-organizing extension spike protein)	IGFPWSEIR	12	99
72	spt|P26038|MOES_HUMAN	Moesin (Membrane-organizing extension spike protein)	ISQLEMAR	15	99
72	spt|P26038|MOES_HUMAN	Moesin (Membrane-organizing extension spike protein)	KAQQELEEQTR	6	99
72	spt|P26038|MOES_HUMAN	Moesin (Membrane-organizing extension spike protein)	KESPLLFK	2	99
72	spt|P26038|MOES_HUMAN	Moesin (Membrane-organizing extension spike protein)	KPDTIEVQQMK	3	99
72	spt|P26038|MOES_HUMAN	Moesin (Membrane-organizing extension spike protein)	LKQIEEQTK	5	99
72	spt|P26038|MOES_HUMAN	Moesin (Membrane-organizing extension spike protein)	QEAEEAKEALLQASR	4	99
72	spt|P26038|MOES_HUMAN	Moesin (Membrane-organizing extension spike protein)	TAMSTPHVAEPAENEQDEQDENGAEASADLR	8	99
72	spt|P26038|MOES_HUMAN	Moesin (Membrane-organizing extension spike protein)	TQEQLALEMAELTAR	12	99
72	spt|P26038|MOES_HUMAN	Moesin (Membrane-organizing extension spike protein)	NISFNDKK	3	98
73	spt|P04792|HSPB1_HUMAN	Heat-shock protein beta-1 (HspB1) (Heat shock 27 kDa protein) (HSP 27) (Stress-responsive protein 27) (SRP27) (Estrogen-regulated 24 kDa protein) (28 kDa heat shock protein)	AQLGGPEAAK	6	99
73	spt|P04792|HSPB1_HUMAN	Heat-shock protein beta-1 (HspB1) (Heat shock 27 kDa protein) (HSP 27) (Stress-responsive protein 27) (SRP27) (Estrogen-regulated 24 kDa protein) (28 kDa heat shock protein)	AQLGGPEAAKSDETAA	4	99
73	spt|P04792|HSPB1_HUMAN	Heat-shock protein beta-1 (HspB1) (Heat shock 27 kDa protein) (HSP 27) (Stress-responsive protein 27) (SRP27) (Estrogen-regulated 24 kDa protein) (28 kDa heat shock protein)	AQLGGPEAAKSDETAAK	7	99
73	spt|P04792|HSPB1_HUMAN	Heat-shock protein beta-1 (HspB1) (Heat shock 27 kDa protein) (HSP 27) (Stress-responsive protein 27) (SRP27) (Estrogen-regulated 24 kDa protein) (28 kDa heat shock protein)	DGVVEITGK	3	99
73	spt|P04792|HSPB1_HUMAN	Heat-shock protein beta-1 (HspB1) (Heat shock 27 kDa protein) (HSP 27) (Stress-responsive protein 27) (SRP27) (Estrogen-regulated 24 kDa protein) (28 kDa heat shock protein)	IESPAVAAPAYSR	1	99
73	spt|P04792|HSPB1_HUMAN	Heat-shock protein beta-1 (HspB1) (Heat shock 27 kDa protein) (HSP 27) (Stress-responsive protein 27) (SRP27) (Estrogen-regulated 24 kDa protein) (28 kDa heat shock protein)	KYTLPPGVDPTQVSSSLSPEGTLTVEAPMPK	7	99
73	spt|P04792|HSPB1_HUMAN	Heat-shock protein beta-1 (HspB1) (Heat shock 27 kDa protein) (HSP 27) (Stress-responsive protein 27) (SRP27) (Estrogen-regulated 24 kDa protein) (28 kDa heat shock protein)	LATQSNEITIPVTFESR	15	99
73	spt|P04792|HSPB1_HUMAN	Heat-shock protein beta-1 (HspB1) (Heat shock 27 kDa protein) (HSP 27) (Stress-responsive protein 27) (SRP27) (Estrogen-regulated 24 kDa protein) (28 kDa heat shock protein)	LFDQAFGLPR	12	99
73	spt|P04792|HSPB1_HUMAN	Heat-shock protein beta-1 (HspB1) (Heat shock 27 kDa protein) (HSP 27) (Stress-responsive protein 27) (SRP27) (Estrogen-regulated 24 kDa protein) (28 kDa heat shock protein)	LPEEWSQWLGGSSWPGYVR	3	99
73	spt|P04792|HSPB1_HUMAN	Heat-shock protein beta-1 (HspB1) (Heat shock 27 kDa protein) (HSP 27) (Stress-responsive protein 27) (SRP27) (Estrogen-regulated 24 kDa protein) (28 kDa heat shock protein)	PLPPAAIESPAVAAPAYSR	3	99
73	spt|P04792|HSPB1_HUMAN	Heat-shock protein beta-1 (HspB1) (Heat shock 27 kDa protein) (HSP 27) (Stress-responsive protein 27) (SRP27) (Estrogen-regulated 24 kDa protein) (28 kDa heat shock protein)	QDEHGYISR	14	99
73	spt|P04792|HSPB1_HUMAN	Heat-shock protein beta-1 (HspB1) (Heat shock 27 kDa protein) (HSP 27) (Stress-responsive protein 27) (SRP27) (Estrogen-regulated 24 kDa protein) (28 kDa heat shock protein)	QLSSGVSEIR	14	99
73	spt|P04792|HSPB1_HUMAN	Heat-shock protein beta-1 (HspB1) (Heat shock 27 kDa protein) (HSP 27) (Stress-responsive protein 27) (SRP27) (Estrogen-regulated 24 kDa protein) (28 kDa heat shock protein)	VSLDVNHFAPDELTVK	14	99
73	spt|P04792|HSPB1_HUMAN	Heat-shock protein beta-1 (HspB1) (Heat shock 27 kDa protein) (HSP 27) (Stress-responsive protein 27) (SRP27) (Estrogen-regulated 24 kDa protein) (28 kDa heat shock protein)	GPSWDPFR	5	97
73	spt|P04792|HSPB1_HUMAN	Heat-shock protein beta-1 (HspB1) (Heat shock 27 kDa protein) (HSP 27) (Stress-responsive protein 27) (SRP27) (Estrogen-regulated 24 kDa protein) (28 kDa heat shock protein)	TKDGVVEITGK	6	97
73	spt|P04792|HSPB1_HUMAN	Heat-shock protein beta-1 (HspB1) (Heat shock 27 kDa protein) (HSP 27) (Stress-responsive protein 27) (SRP27) (Estrogen-regulated 24 kDa protein) (28 kDa heat shock protein)	ATQSNEITIPVTFESR	2	95
74	trm|Q53FI1|Q53FI1_HUMAN	L-plastin variant (Fragment)	AACLPLPGYR	1	99
74	trm|Q53FI1|Q53FI1_HUMAN	L-plastin variant (Fragment)	FSLVGIGGQDLNEGNR	6	99
74	trm|Q53FI1|Q53FI1_HUMAN	L-plastin variant (Fragment)	ISTSLPVLDLIDAIQPGSINYDLLK	3	99
74	trm|Q53FI1|Q53FI1_HUMAN	L-plastin variant (Fragment)	MINLSVPDTIDER	10	99
74	trm|Q53FI1|Q53FI1_HUMAN	L-plastin variant (Fragment)	QFVTATDVVR	9	99
74	trm|Q53FI1|Q53FI1_HUMAN	L-plastin variant (Fragment)	VYALPEDLVEVNPK	6	99
74	trm|Q53FI1|Q53FI1_HUMAN	L-plastin variant (Fragment)	KLENCNYAVELGK	1	98
74	trm|Q53FI1|Q53FI1_HUMAN	L-plastin variant (Fragment)	YAISMAR	3	97
75	trm|Q549N7|Q549N7_HUMAN	Mutant beta-globin	EFTPPVQAAYQK	12	99
75	trm|Q549N7|Q549N7_HUMAN	Mutant beta-globin	ESFGDLSTPDAVMGNPK	4	99
75	trm|Q549N7|Q549N7_HUMAN	Mutant beta-globin	FFESFGDLSTPDAV	3	99
75	trm|Q549N7|Q549N7_HUMAN	Mutant beta-globin	FFESFGDLSTPDAVMGN	15	99
75	trm|Q549N7|Q549N7_HUMAN	Mutant beta-globin	FFESFGDLSTPDAVMGNPK	19	99
75	trm|Q549N7|Q549N7_HUMAN	Mutant beta-globin	GDLSTPDAVMGNPK	11	99
75	trm|Q549N7|Q549N7_HUMAN	Mutant beta-globin	GKVNVDEVGGEALGR	2	99
75	trm|Q549N7|Q549N7_HUMAN	Mutant beta-globin	GLAHLDNLK	3	99
75	trm|Q549N7|Q549N7_HUMAN	Mutant beta-globin	GTFATLSELHCDK	6	99
75	trm|Q549N7|Q549N7_HUMAN	Mutant beta-globin	KVLGAFSDGLAHLDNLK	11	99
75	trm|Q549N7|Q549N7_HUMAN	Mutant beta-globin	LHVDPENFR	7	99
75	trm|Q549N7|Q549N7_HUMAN	Mutant beta-globin	LLVVYPWTQR	20	99
75	trm|Q549N7|Q549N7_HUMAN	Mutant beta-globin	PDAVMGNPK	11	99
75	trm|Q549N7|Q549N7_HUMAN	Mutant beta-globin	SAVTALWGK	19	99
75	trm|Q549N7|Q549N7_HUMAN	Mutant beta-globin	SAVTALWGKVNVDEVGGEALGR	8	99
75	trm|Q549N7|Q549N7_HUMAN	Mutant beta-globin	SDGLAHLDNLK	6	99
75	trm|Q549N7|Q549N7_HUMAN	Mutant beta-globin	STPDAVMGNPK	3	99
75	trm|Q549N7|Q549N7_HUMAN	Mutant beta-globin	VDEVGGEALGR	8	99
75	trm|Q549N7|Q549N7_HUMAN	Mutant beta-globin	VHLTPEEK	18	99
75	trm|Q549N7|Q549N7_HUMAN	Mutant beta-globin	VLGAFSDGLAHLDNLK	9	99
75	trm|Q549N7|Q549N7_HUMAN	Mutant beta-globin	VNVDEVGGEAL	9	99
75	trm|Q549N7|Q549N7_HUMAN	Mutant beta-globin	VNVDEVGGEALGR	19	99
75	trm|Q549N7|Q549N7_HUMAN	Mutant beta-globin	VVAGVANALAHK	17	99
75	trm|Q549N7|Q549N7_HUMAN	Mutant beta-globin	VVAGVANALAHKYH	11	99
75	trm|Q549N7|Q549N7_HUMAN	Mutant beta-globin	DEVGGEALGR	5	97
75	trm|Q549N7|Q549N7_HUMAN	Mutant beta-globin	FFESFGDLSTPDA	2	96
76	spt|P19338|NUCL_HUMAN	Nucleolin (Protein C23)	ALELTGLK	5	99
76	spt|P19338|NUCL_HUMAN	Nucleolin (Protein C23)	EVFEDAAEIR	3	99
76	spt|P19338|NUCL_HUMAN	Nucleolin (Protein C23)	GFGFVDFNSEEDAK	8	99
76	spt|P19338|NUCL_HUMAN	Nucleolin (Protein C23)	GLSEDTTEETLKESFDGSVR	1	99
76	spt|P19338|NUCL_HUMAN	Nucleolin (Protein C23)	GYAFIEFASFEDAK	2	99
76	spt|P19338|NUCL_HUMAN	Nucleolin (Protein C23)	NDLAVVDVR	10	99
76	spt|P19338|NUCL_HUMAN	Nucleolin (Protein C23)	TGISDVFAK	5	99
76	spt|P19338|NUCL_HUMAN	Nucleolin (Protein C23)	VAVATPAK	7	99
76	spt|P19338|NUCL_HUMAN	Nucleolin (Protein C23)	VEGTEPTTAFNLFVGNLNFNK	3	99
76	spt|P19338|NUCL_HUMAN	Nucleolin (Protein C23)	VTQDELKEVFEDAAEIR	4	99
76	spt|P19338|NUCL_HUMAN	Nucleolin (Protein C23)	GQNQDYR	3	96
76	spt|P19338|NUCL_HUMAN	Nucleolin (Protein C23)	QGTEIDGR	4	96
77	trm|Q5U4P6|Q5U4P6_HUMAN	KHSRP protein	AINQQTGAFVEISR	8	99
77	trm|Q5U4P6|Q5U4P6_HUMAN	KHSRP protein	DAFADAVQR	5	99
77	trm|Q5U4P6|Q5U4P6_HUMAN	KHSRP protein	GGGGPGGGGPGGGSAGGPSQPPGGGGPGIR	15	99
77	trm|Q5U4P6|Q5U4P6_HUMAN	KHSRP protein	GSPQQIDHAK	8	99
77	trm|Q5U4P6|Q5U4P6_HUMAN	KHSRP protein	IGGGIDVPVPR	14	99
77	trm|Q5U4P6|Q5U4P6_HUMAN	KHSRP protein	IGQQPQQPGAPPQQDYTK	6	99
77	trm|Q5U4P6|Q5U4P6_HUMAN	KHSRP protein	IINDLLQSLR	6	99
77	trm|Q5U4P6|Q5U4P6_HUMAN	KHSRP protein	IQFKQDDGTGPEK	4	99
77	trm|Q5U4P6|Q5U4P6_HUMAN	KHSRP protein	MMLDDIVSR	5	99
77	trm|Q5U4P6|Q5U4P6_HUMAN	KHSRP protein	QLEDGDQPESK	9	99
77	trm|Q5U4P6|Q5U4P6_HUMAN	KHSRP protein	SVSLTGAPESVQK	3	99
77	trm|Q5U4P6|Q5U4P6_HUMAN	KHSRP protein	VQISPDSGGLPER	8	99
77	trm|Q5U4P6|Q5U4P6_HUMAN	KHSRP protein	ERDQGGFGDR	2	98
78	trm|Q53FP8|Q53FP8_HUMAN	"Calponin 1, basic, smooth muscle variant (Fragment) "	DGIILCEFINK	3	99
78	trm|Q53FP8|Q53FP8_HUMAN	"Calponin 1, basic, smooth muscle variant (Fragment) "	EWIEGVTGR	10	99
78	trm|Q53FP8|Q53FP8_HUMAN	"Calponin 1, basic, smooth muscle variant (Fragment) "	FASQQGMTAYGTR	10	99
78	trm|Q53FP8|Q53FP8_HUMAN	"Calponin 1, basic, smooth muscle variant (Fragment) "	GASQAGMTAPGTK	4	99
78	trm|Q53FP8|Q53FP8_HUMAN	"Calponin 1, basic, smooth muscle variant (Fragment) "	GASQAGMTAPGTKR	6	99
78	trm|Q53FP8|Q53FP8_HUMAN	"Calponin 1, basic, smooth muscle variant (Fragment) "	GMTVYGLPR	10	99
78	trm|Q53FP8|Q53FP8_HUMAN	"Calponin 1, basic, smooth muscle variant (Fragment) "	GPAYGLSAEVK	7	99
78	trm|Q53FP8|Q53FP8_HUMAN	"Calponin 1, basic, smooth muscle variant (Fragment) "	IGNNFMDGLK	6	99
78	trm|Q53FP8|Q53FP8_HUMAN	"Calponin 1, basic, smooth muscle variant (Fragment) "	INESTQNWHQLENIGNFIK	4	99
78	trm|Q53FP8|Q53FP8_HUMAN	"Calponin 1, basic, smooth muscle variant (Fragment) "	LGTDQPLDQATISLQMGTNK	6	99
78	trm|Q53FP8|Q53FP8_HUMAN	"Calponin 1, basic, smooth muscle variant (Fragment) "	NIIGLQMGTNK	6	99
78	trm|Q53FP8|Q53FP8_HUMAN	"Calponin 1, basic, smooth muscle variant (Fragment) "	EQELREWIEGVTGR	6	98
79	trm|Q53GL5|Q53GL5_HUMAN	"Isocitrate dehydrogenase 2 (NADP+), mitochondrial variant (Fragment) "	ATDFVADR	9	99
79	trm|Q53GL5|Q53GL5_HUMAN	"Isocitrate dehydrogenase 2 (NADP+), mitochondrial variant (Fragment) "	CATITPDEAR	6	99
79	trm|Q53GL5|Q53GL5_HUMAN	"Isocitrate dehydrogenase 2 (NADP+), mitochondrial variant (Fragment) "	DLAGCIHGLSNVK	6	99
79	trm|Q53GL5|Q53GL5_HUMAN	"Isocitrate dehydrogenase 2 (NADP+), mitochondrial variant (Fragment) "	LIDDMVAQVLK	7	99
79	trm|Q53GL5|Q53GL5_HUMAN	"Isocitrate dehydrogenase 2 (NADP+), mitochondrial variant (Fragment) "	LVPGWTKPITIGR	6	99
79	trm|Q53GL5|Q53GL5_HUMAN	"Isocitrate dehydrogenase 2 (NADP+), mitochondrial variant (Fragment) "	NILGGTVFR	7	99
79	trm|Q53GL5|Q53GL5_HUMAN	"Isocitrate dehydrogenase 2 (NADP+), mitochondrial variant (Fragment) "	TIEAEAAHGTVTR	10	99
79	trm|Q53GL5|Q53GL5_HUMAN	"Isocitrate dehydrogenase 2 (NADP+), mitochondrial variant (Fragment) "	VCVETVESGAMTK	2	99
79	trm|Q53GL5|Q53GL5_HUMAN	"Isocitrate dehydrogenase 2 (NADP+), mitochondrial variant (Fragment) "	YFDLGLPNR	3	99
79	trm|Q53GL5|Q53GL5_HUMAN	"Isocitrate dehydrogenase 2 (NADP+), mitochondrial variant (Fragment) "	GRPTSTNPIASIFAWTR	4	96
80	trm|Q5EBM2|Q5EBM2_HUMAN	Hypothetical protein	ALPAPIEK	9	99
80	trm|Q5EBM2|Q5EBM2_HUMAN	Hypothetical protein	APELLGGPSVFLFPPKPK	1	99
80	trm|Q5EBM2|Q5EBM2_HUMAN	Hypothetical protein	CPAPELLGGPSVFLFPPKPK	4	99
80	trm|Q5EBM2|Q5EBM2_HUMAN	Hypothetical protein	DGVEVHNAK	3	99
80	trm|Q5EBM2|Q5EBM2_HUMAN	Hypothetical protein	EPQVYTLPPSR	8	99
80	trm|Q5EBM2|Q5EBM2_HUMAN	Hypothetical protein	EPQVYTLPPSREEMTK	7	99
80	trm|Q5EBM2|Q5EBM2_HUMAN	Hypothetical protein	GPSVFPLAPCSR	8	99
80	trm|Q5EBM2|Q5EBM2_HUMAN	Hypothetical protein	NQVSLTCLVK	4	99
80	trm|Q5EBM2|Q5EBM2_HUMAN	Hypothetical protein	QVQLVQSGAEVK	9	99
80	trm|Q5EBM2|Q5EBM2_HUMAN	Hypothetical protein	SCDTPPPCPR	7	99
80	trm|Q5EBM2|Q5EBM2_HUMAN	Hypothetical protein	STSGGTAALGCLVK	6	99
80	trm|Q5EBM2|Q5EBM2_HUMAN	Hypothetical protein	SVFPLAPCSR	2	99
80	trm|Q5EBM2|Q5EBM2_HUMAN	Hypothetical protein	TPLGDTTHTCPR	4	99
80	trm|Q5EBM2|Q5EBM2_HUMAN	Hypothetical protein	TTPPMLDSDGSFFLYSK	9	99
80	trm|Q5EBM2|Q5EBM2_HUMAN	Hypothetical protein	VVSVLTVLHQDWLNGK	4	99
80	trm|Q5EBM2|Q5EBM2_HUMAN	Hypothetical protein	VVSVLTVLHQDWLNGKEYK	3	99
80	trm|Q5EBM2|Q5EBM2_HUMAN	Hypothetical protein	WYVDGVEVHNAK	4	99
80	trm|Q5EBM2|Q5EBM2_HUMAN	Hypothetical protein	DYFPEPVTV	6	98
80	trm|Q5EBM2|Q5EBM2_HUMAN	Hypothetical protein	TCNVNHKPSNTK	3	98
81	spt|P31948|STIP1_HUMAN	Stress-induced-phosphoprotein 1 (STI1) (Hsc70/Hsp90-organizing protein) (Hop) (Transformation-sensitive protein IEF SSP 3521) (NY- REN-11 antigen)	AAALEFLNR	1	99
81	spt|P31948|STIP1_HUMAN	Stress-induced-phosphoprotein 1 (STI1) (Hsc70/Hsp90-organizing protein) (Hop) (Transformation-sensitive protein IEF SSP 3521) (NY- REN-11 antigen)	ALSVGNIDDALQCYSEAIK	2	99
81	spt|P31948|STIP1_HUMAN	Stress-induced-phosphoprotein 1 (STI1) (Hsc70/Hsp90-organizing protein) (Hop) (Transformation-sensitive protein IEF SSP 3521) (NY- REN-11 antigen)	LAYINPDLALEEK	2	99
81	spt|P31948|STIP1_HUMAN	Stress-induced-phosphoprotein 1 (STI1) (Hsc70/Hsp90-organizing protein) (Hop) (Transformation-sensitive protein IEF SSP 3521) (NY- REN-11 antigen)	LMDVGLIAIR	1	99
81	spt|P31948|STIP1_HUMAN	Stress-induced-phosphoprotein 1 (STI1) (Hsc70/Hsp90-organizing protein) (Hop) (Transformation-sensitive protein IEF SSP 3521) (NY- REN-11 antigen)	EAADGYQR	1	96
82	spt|P04083|ANXA1_HUMAN	Annexin A1 (Annexin I) (Lipocortin I) (Calpactin II) (Chromobindin-9) (p35) (Phospholipase A2 inhibitory protein)	AAYLQETGKPLDETLKK	4	99
82	spt|P04083|ANXA1_HUMAN	Annexin A1 (Annexin I) (Lipocortin I) (Calpactin II) (Chromobindin-9) (p35) (Phospholipase A2 inhibitory protein)	ALYEAGER	5	99
82	spt|P04083|ANXA1_HUMAN	Annexin A1 (Annexin I) (Lipocortin I) (Calpactin II) (Chromobindin-9) (p35) (Phospholipase A2 inhibitory protein)	ALYEAGERR	4	99
82	spt|P04083|ANXA1_HUMAN	Annexin A1 (Annexin I) (Lipocortin I) (Calpactin II) (Chromobindin-9) (p35) (Phospholipase A2 inhibitory protein)	CATSKPAFFAEK	2	99
82	spt|P04083|ANXA1_HUMAN	Annexin A1 (Annexin I) (Lipocortin I) (Calpactin II) (Chromobindin-9) (p35) (Phospholipase A2 inhibitory protein)	DITSDTSGDFR	12	99
82	spt|P04083|ANXA1_HUMAN	Annexin A1 (Annexin I) (Lipocortin I) (Calpactin II) (Chromobindin-9) (p35) (Phospholipase A2 inhibitory protein)	GDRSEDFGVNEDLADSDAR	7	99
82	spt|P04083|ANXA1_HUMAN	Annexin A1 (Annexin I) (Lipocortin I) (Calpactin II) (Chromobindin-9) (p35) (Phospholipase A2 inhibitory protein)	GGPGSAVSPYPTFNPSSDVAALHK	11	99
82	spt|P04083|ANXA1_HUMAN	Annexin A1 (Annexin I) (Lipocortin I) (Calpactin II) (Chromobindin-9) (p35) (Phospholipase A2 inhibitory protein)	GLGTDEDTLIEILASR	13	99
82	spt|P04083|ANXA1_HUMAN	Annexin A1 (Annexin I) (Lipocortin I) (Calpactin II) (Chromobindin-9) (p35) (Phospholipase A2 inhibitory protein)	GTDVNVFNTILTTR	12	99
82	spt|P04083|ANXA1_HUMAN	Annexin A1 (Annexin I) (Lipocortin I) (Calpactin II) (Chromobindin-9) (p35) (Phospholipase A2 inhibitory protein)	GVDEATIIDILT	1	99
82	spt|P04083|ANXA1_HUMAN	Annexin A1 (Annexin I) (Lipocortin I) (Calpactin II) (Chromobindin-9) (p35) (Phospholipase A2 inhibitory protein)	GVDEATIIDILTK	14	99
82	spt|P04083|ANXA1_HUMAN	Annexin A1 (Annexin I) (Lipocortin I) (Calpactin II) (Chromobindin-9) (p35) (Phospholipase A2 inhibitory protein)	GVDEATIIDILTKR	4	99
82	spt|P04083|ANXA1_HUMAN	Annexin A1 (Annexin I) (Lipocortin I) (Calpactin II) (Chromobindin-9) (p35) (Phospholipase A2 inhibitory protein)	MYGISLCQAILDETK	1	99
82	spt|P04083|ANXA1_HUMAN	Annexin A1 (Annexin I) (Lipocortin I) (Calpactin II) (Chromobindin-9) (p35) (Phospholipase A2 inhibitory protein)	QAWFIENEEQEYVQTVK	7	99
82	spt|P04083|ANXA1_HUMAN	Annexin A1 (Annexin I) (Lipocortin I) (Calpactin II) (Chromobindin-9) (p35) (Phospholipase A2 inhibitory protein)	SEDFGVNEDLADSDAR	7	99
82	spt|P04083|ANXA1_HUMAN	Annexin A1 (Annexin I) (Lipocortin I) (Calpactin II) (Chromobindin-9) (p35) (Phospholipase A2 inhibitory protein)	TPAQFDADELR	8	99
82	spt|P04083|ANXA1_HUMAN	Annexin A1 (Annexin I) (Lipocortin I) (Calpactin II) (Chromobindin-9) (p35) (Phospholipase A2 inhibitory protein)	AMVSEFLK	17	98
82	spt|P04083|ANXA1_HUMAN	Annexin A1 (Annexin I) (Lipocortin I) (Calpactin II) (Chromobindin-9) (p35) (Phospholipase A2 inhibitory protein)	NALLSLAK	10	97
82	spt|P04083|ANXA1_HUMAN	Annexin A1 (Annexin I) (Lipocortin I) (Calpactin II) (Chromobindin-9) (p35) (Phospholipase A2 inhibitory protein)	KGTDVNVFNTILTTR	7	96
83	trm|Q59FF0|Q59FF0_HUMAN	EBNA-2 co-activator variant (Fragment)	ANNPEQNR	4	99
83	trm|Q59FF0|Q59FF0_HUMAN	EBNA-2 co-activator variant (Fragment)	DTNGENIAESLVAEGLATR	5	99
83	trm|Q59FF0|Q59FF0_HUMAN	EBNA-2 co-activator variant (Fragment)	LGTLSPAFSTR	7	99
83	trm|Q59FF0|Q59FF0_HUMAN	EBNA-2 co-activator variant (Fragment)	NDIASHPPVEGSYAPR	3	99
83	trm|Q59FF0|Q59FF0_HUMAN	EBNA-2 co-activator variant (Fragment)	NLPGLVQEGEPFSEEATLFTK	3	99
83	trm|Q59FF0|Q59FF0_HUMAN	EBNA-2 co-activator variant (Fragment)	SEAVVEYVFSGSR	2	99
83	trm|Q59FF0|Q59FF0_HUMAN	EBNA-2 co-activator variant (Fragment)	VADISGDTQK	5	99
83	trm|Q59FF0|Q59FF0_HUMAN	EBNA-2 co-activator variant (Fragment)	LSECEEQAK	1	95
84	spt|P06744|G6PI_HUMAN	Glucose-6-phosphate isomerase (EC 5.3.1.9) (GPI) (Phosphoglucose isomerase) (PGI) (Phosphohexose isomerase) (PHI) (Neuroleukin) (NLK) (Sperm antigen 36) (SA-36)	AVLHVALR	4	99
84	spt|P06744|G6PI_HUMAN	Glucose-6-phosphate isomerase (EC 5.3.1.9) (GPI) (Phosphoglucose isomerase) (PGI) (Phosphohexose isomerase) (PHI) (Neuroleukin) (NLK) (Sperm antigen 36) (SA-36)	ILLANFLAQTEALMR	7	99
84	spt|P06744|G6PI_HUMAN	Glucose-6-phosphate isomerase (EC 5.3.1.9) (GPI) (Phosphoglucose isomerase) (PGI) (Phosphohexose isomerase) (PHI) (Neuroleukin) (NLK) (Sperm antigen 36) (SA-36)	NLVTEDVMR	4	99
84	spt|P06744|G6PI_HUMAN	Glucose-6-phosphate isomerase (EC 5.3.1.9) (GPI) (Phosphoglucose isomerase) (PGI) (Phosphohexose isomerase) (PHI) (Neuroleukin) (NLK) (Sperm antigen 36) (SA-36)	TFTTQETITNAETAK	5	99
84	spt|P06744|G6PI_HUMAN	Glucose-6-phosphate isomerase (EC 5.3.1.9) (GPI) (Phosphoglucose isomerase) (PGI) (Phosphohexose isomerase) (PHI) (Neuroleukin) (NLK) (Sperm antigen 36) (SA-36)	TLAQLNPESSLFIIASK	10	99
84	spt|P06744|G6PI_HUMAN	Glucose-6-phosphate isomerase (EC 5.3.1.9) (GPI) (Phosphoglucose isomerase) (PGI) (Phosphohexose isomerase) (PHI) (Neuroleukin) (NLK) (Sperm antigen 36) (SA-36)	VFEGNRPTNSIVFTK	3	99
84	spt|P06744|G6PI_HUMAN	Glucose-6-phosphate isomerase (EC 5.3.1.9) (GPI) (Phosphoglucose isomerase) (PGI) (Phosphohexose isomerase) (PHI) (Neuroleukin) (NLK) (Sperm antigen 36) (SA-36)	VWYVSNIDGTHIAK	3	99
85	spt|Q15746|MYLK_HUMAN	"Myosin light chain kinase, smooth muscle (EC 2.7.11.18) (MLCK) (Telokin) (Kinase-related protein) (KRP) "	AAMPPQIIQFPEDQK	3	99
85	spt|Q15746|MYLK_HUMAN	"Myosin light chain kinase, smooth muscle (EC 2.7.11.18) (MLCK) (Telokin) (Kinase-related protein) (KRP) "	DLEVVEGSAAR	11	99
85	spt|Q15746|MYLK_HUMAN	"Myosin light chain kinase, smooth muscle (EC 2.7.11.18) (MLCK) (Telokin) (Kinase-related protein) (KRP) "	IEGYPDPEVVWFK	5	99
85	spt|Q15746|MYLK_HUMAN	"Myosin light chain kinase, smooth muscle (EC 2.7.11.18) (MLCK) (Telokin) (Kinase-related protein) (KRP) "	LIDFGLAR	9	99
85	spt|Q15746|MYLK_HUMAN	"Myosin light chain kinase, smooth muscle (EC 2.7.11.18) (MLCK) (Telokin) (Kinase-related protein) (KRP) "	LQDVHVAEGK	2	99
85	spt|Q15746|MYLK_HUMAN	"Myosin light chain kinase, smooth muscle (EC 2.7.11.18) (MLCK) (Telokin) (Kinase-related protein) (KRP) "	LSSMAMISGLSGR	9	99
85	spt|Q15746|MYLK_HUMAN	"Myosin light chain kinase, smooth muscle (EC 2.7.11.18) (MLCK) (Telokin) (Kinase-related protein) (KRP) "	SSLPPVLGTESDATVK	3	99
85	spt|Q15746|MYLK_HUMAN	"Myosin light chain kinase, smooth muscle (EC 2.7.11.18) (MLCK) (Telokin) (Kinase-related protein) (KRP) "	TIRDLEVVEGSAAR	7	99
85	spt|Q15746|MYLK_HUMAN	"Myosin light chain kinase, smooth muscle (EC 2.7.11.18) (MLCK) (Telokin) (Kinase-related protein) (KRP) "	VSDFYDIEER	7	99
85	spt|Q15746|MYLK_HUMAN	"Myosin light chain kinase, smooth muscle (EC 2.7.11.18) (MLCK) (Telokin) (Kinase-related protein) (KRP) "	LVQCVDAFEEK	4	98
86	spt|P40925|MDHC_HUMAN	"Malate dehydrogenase, cytoplasmic (EC 1.1.1.37) (Cytosolic malate dehydrogenase) "	ELTEEKESAFEFLSSA	7	99
86	spt|P40925|MDHC_HUMAN	"Malate dehydrogenase, cytoplasmic (EC 1.1.1.37) (Cytosolic malate dehydrogenase) "	ENFSCLTR	4	99
86	spt|P40925|MDHC_HUMAN	"Malate dehydrogenase, cytoplasmic (EC 1.1.1.37) (Cytosolic malate dehydrogenase) "	EVGVYEALKDDSWLK	1	99
86	spt|P40925|MDHC_HUMAN	"Malate dehydrogenase, cytoplasmic (EC 1.1.1.37) (Cytosolic malate dehydrogenase) "	FVEGLPINDFSR	14	99
86	spt|P40925|MDHC_HUMAN	"Malate dehydrogenase, cytoplasmic (EC 1.1.1.37) (Cytosolic malate dehydrogenase) "	GEFVTTVQQR	8	99
86	spt|P40925|MDHC_HUMAN	"Malate dehydrogenase, cytoplasmic (EC 1.1.1.37) (Cytosolic malate dehydrogenase) "	LGVTANDVK	5	99
86	spt|P40925|MDHC_HUMAN	"Malate dehydrogenase, cytoplasmic (EC 1.1.1.37) (Cytosolic malate dehydrogenase) "	SQGAALDKYAK	4	99
86	spt|P40925|MDHC_HUMAN	"Malate dehydrogenase, cytoplasmic (EC 1.1.1.37) (Cytosolic malate dehydrogenase) "	VIVVGNPANTNCLTASK	7	99
87	spt|P30044|PRDX5_HUMAN	"Peroxiredoxin-5, mitochondrial precursor (EC 1.11.1.15) (Prx-V) (Peroxisomal antioxidant enzyme) (PLP) (Thioredoxin reductase) (Thioredoxin peroxidase PMP20) (Antioxidant enzyme B166) (AOEB166) (TPx type VI) (Liver tissue 2D-page spot 71B) (Alu corepressor 1) "	ALNVEPDGTGLTCSLAPNIISQL	6	99
87	spt|P30044|PRDX5_HUMAN	"Peroxiredoxin-5, mitochondrial precursor (EC 1.11.1.15) (Prx-V) (Peroxisomal antioxidant enzyme) (PLP) (Thioredoxin reductase) (Thioredoxin peroxidase PMP20) (Antioxidant enzyme B166) (AOEB166) (TPx type VI) (Liver tissue 2D-page spot 71B) (Alu corepressor 1) "	ETDLLLDDSLVSIFGNR	4	99
87	spt|P30044|PRDX5_HUMAN	"Peroxiredoxin-5, mitochondrial precursor (EC 1.11.1.15) (Prx-V) (Peroxisomal antioxidant enzyme) (PLP) (Thioredoxin reductase) (Thioredoxin peroxidase PMP20) (Antioxidant enzyme B166) (AOEB166) (TPx type VI) (Liver tissue 2D-page spot 71B) (Alu corepressor 1) "	FSMVVQDGIVK	7	99
87	spt|P30044|PRDX5_HUMAN	"Peroxiredoxin-5, mitochondrial precursor (EC 1.11.1.15) (Prx-V) (Peroxisomal antioxidant enzyme) (PLP) (Thioredoxin reductase) (Thioredoxin peroxidase PMP20) (Antioxidant enzyme B166) (AOEB166) (TPx type VI) (Liver tissue 2D-page spot 71B) (Alu corepressor 1) "	GVLFGVPGAFTPGCSK	8	99
87	spt|P30044|PRDX5_HUMAN	"Peroxiredoxin-5, mitochondrial precursor (EC 1.11.1.15) (Prx-V) (Peroxisomal antioxidant enzyme) (PLP) (Thioredoxin reductase) (Thioredoxin peroxidase PMP20) (Antioxidant enzyme B166) (AOEB166) (TPx type VI) (Liver tissue 2D-page spot 71B) (Alu corepressor 1) "	LLADPTGAFGK	6	99
87	spt|P30044|PRDX5_HUMAN	"Peroxiredoxin-5, mitochondrial precursor (EC 1.11.1.15) (Prx-V) (Peroxisomal antioxidant enzyme) (PLP) (Thioredoxin reductase) (Thioredoxin peroxidase PMP20) (Antioxidant enzyme B166) (AOEB166) (TPx type VI) (Liver tissue 2D-page spot 71B) (Alu corepressor 1) "	THLPGFVEQAEALK	4	99
87	spt|P30044|PRDX5_HUMAN	"Peroxiredoxin-5, mitochondrial precursor (EC 1.11.1.15) (Prx-V) (Peroxisomal antioxidant enzyme) (PLP) (Thioredoxin reductase) (Thioredoxin peroxidase PMP20) (Antioxidant enzyme B166) (AOEB166) (TPx type VI) (Liver tissue 2D-page spot 71B) (Alu corepressor 1) "	VGDAIPAVEVFEGEPGNK	4	99
87	spt|P30044|PRDX5_HUMAN	"Peroxiredoxin-5, mitochondrial precursor (EC 1.11.1.15) (Prx-V) (Peroxisomal antioxidant enzyme) (PLP) (Thioredoxin reductase) (Thioredoxin peroxidase PMP20) (Antioxidant enzyme B166) (AOEB166) (TPx type VI) (Liver tissue 2D-page spot 71B) (Alu corepressor 1) "	VGGAGGQSAAAAAR	4	99
87	spt|P30044|PRDX5_HUMAN	"Peroxiredoxin-5, mitochondrial precursor (EC 1.11.1.15) (Prx-V) (Peroxisomal antioxidant enzyme) (PLP) (Thioredoxin reductase) (Thioredoxin peroxidase PMP20) (Antioxidant enzyme B166) (AOEB166) (TPx type VI) (Liver tissue 2D-page spot 71B) (Alu corepressor 1) "	VNLAELFK	5	99
87	spt|P30044|PRDX5_HUMAN	"Peroxiredoxin-5, mitochondrial precursor (EC 1.11.1.15) (Prx-V) (Peroxisomal antioxidant enzyme) (PLP) (Thioredoxin reductase) (Thioredoxin peroxidase PMP20) (Antioxidant enzyme B166) (AOEB166) (TPx type VI) (Liver tissue 2D-page spot 71B) (Alu corepressor 1) "	SRAAAAMAPIK	2	96
88	spt|P30086|PEBP1_HUMAN	Phosphatidylethanolamine-binding protein 1 (PEBP-1) (Prostatic-binding protein) (HCNPpp) (Neuropolypeptide h3) (Raf kinase inhibitor protein) (RKIP) [Contains: Hippocampal cholinergic neurostimulating peptide (HCNP)]	APVAGTCYQAEWDDYVPK	10	99
88	spt|P30086|PEBP1_HUMAN	Phosphatidylethanolamine-binding protein 1 (PEBP-1) (Prostatic-binding protein) (HCNPpp) (Neuropolypeptide h3) (Raf kinase inhibitor protein) (RKIP) [Contains: Hippocampal cholinergic neurostimulating peptide (HCNP)]	CDEPILSNR	7	99
88	spt|P30086|PEBP1_HUMAN	Phosphatidylethanolamine-binding protein 1 (PEBP-1) (Prostatic-binding protein) (HCNPpp) (Neuropolypeptide h3) (Raf kinase inhibitor protein) (RKIP) [Contains: Hippocampal cholinergic neurostimulating peptide (HCNP)]	GNDISSGTVLSDYVGSGPPK	11	99
88	spt|P30086|PEBP1_HUMAN	Phosphatidylethanolamine-binding protein 1 (PEBP-1) (Prostatic-binding protein) (HCNPpp) (Neuropolypeptide h3) (Raf kinase inhibitor protein) (RKIP) [Contains: Hippocampal cholinergic neurostimulating peptide (HCNP)]	LYEQLSGK	12	99
88	spt|P30086|PEBP1_HUMAN	Phosphatidylethanolamine-binding protein 1 (PEBP-1) (Prostatic-binding protein) (HCNPpp) (Neuropolypeptide h3) (Raf kinase inhibitor protein) (RKIP) [Contains: Hippocampal cholinergic neurostimulating peptide (HCNP)]	LYTLVLTDPDAPSR	9	99
88	spt|P30086|PEBP1_HUMAN	Phosphatidylethanolamine-binding protein 1 (PEBP-1) (Prostatic-binding protein) (HCNPpp) (Neuropolypeptide h3) (Raf kinase inhibitor protein) (RKIP) [Contains: Hippocampal cholinergic neurostimulating peptide (HCNP)]	VLTPTQVK	9	99
88	spt|P30086|PEBP1_HUMAN	Phosphatidylethanolamine-binding protein 1 (PEBP-1) (Prostatic-binding protein) (HCNPpp) (Neuropolypeptide h3) (Raf kinase inhibitor protein) (RKIP) [Contains: Hippocampal cholinergic neurostimulating peptide (HCNP)]	WSGPLSLQEVDEQPQHPLHVTYAGAAVDELGK	4	99
88	spt|P30086|PEBP1_HUMAN	Phosphatidylethanolamine-binding protein 1 (PEBP-1) (Prostatic-binding protein) (HCNPpp) (Neuropolypeptide h3) (Raf kinase inhibitor protein) (RKIP) [Contains: Hippocampal cholinergic neurostimulating peptide (HCNP)]	YVWLVYEQDRPLK	2	99
89	trm|Q53EM5|Q53EM5_HUMAN	Transketolase variant (Fragment)	AVELAANTK	7	99
89	trm|Q53EM5|Q53EM5_HUMAN	Transketolase variant (Fragment)	DAIAQAVR	4	99
89	trm|Q53EM5|Q53EM5_HUMAN	Transketolase variant (Fragment)	IIALDGDTK	13	99
89	trm|Q53EM5|Q53EM5_HUMAN	Transketolase variant (Fragment)	ILATPPQEDAPSVDIANIR	18	99
89	trm|Q53EM5|Q53EM5_HUMAN	Transketolase variant (Fragment)	ISSDLDGHPVPK	11	99
89	trm|Q53EM5|Q53EM5_HUMAN	Transketolase variant (Fragment)	KAYGQALAK	8	99
89	trm|Q53EM5|Q53EM5_HUMAN	Transketolase variant (Fragment)	KLILDSAR	7	99
89	trm|Q53EM5|Q53EM5_HUMAN	Transketolase variant (Fragment)	LQALKDTANR	5	99
89	trm|Q53EM5|Q53EM5_HUMAN	Transketolase variant (Fragment)	MFGIDRDAIAQAVR	4	99
89	trm|Q53EM5|Q53EM5_HUMAN	Transketolase variant (Fragment)	NMAEQIIQEIYSQIQSK	8	99
89	trm|Q53EM5|Q53EM5_HUMAN	Transketolase variant (Fragment)	SVPTSTVFYPSDGVATEK	11	99
89	trm|Q53EM5|Q53EM5_HUMAN	Transketolase variant (Fragment)	TSRPENAIIYNNNEDFQVGQAK	6	99
89	trm|Q53EM5|Q53EM5_HUMAN	Transketolase variant (Fragment)	VLDPFTIKPLDR	10	99
89	trm|Q53EM5|Q53EM5_HUMAN	Transketolase variant (Fragment)	MESYHKPDQQK	1	97
90	spt|P00738|HPT_HUMAN	Haptoglobin precursor [Contains: Haptoglobin alpha chain; Haptoglobin beta chain]	AVGDKLPECEAVCGKPK	4	99
90	spt|P00738|HPT_HUMAN	Haptoglobin precursor [Contains: Haptoglobin alpha chain; Haptoglobin beta chain]	DIAPTLTLYVGK	4	99
90	spt|P00738|HPT_HUMAN	Haptoglobin precursor [Contains: Haptoglobin alpha chain; Haptoglobin beta chain]	DIAPTLTLYVGKK	2	99
90	spt|P00738|HPT_HUMAN	Haptoglobin precursor [Contains: Haptoglobin alpha chain; Haptoglobin beta chain]	GSFPWQAK	11	99
90	spt|P00738|HPT_HUMAN	Haptoglobin precursor [Contains: Haptoglobin alpha chain; Haptoglobin beta chain]	ILGGHLDAK	13	99
90	spt|P00738|HPT_HUMAN	Haptoglobin precursor [Contains: Haptoglobin alpha chain; Haptoglobin beta chain]	LRTEGDGVYTLNNEK	6	99
90	spt|P00738|HPT_HUMAN	Haptoglobin precursor [Contains: Haptoglobin alpha chain; Haptoglobin beta chain]	NPANPVQR	7	99
90	spt|P00738|HPT_HUMAN	Haptoglobin precursor [Contains: Haptoglobin alpha chain; Haptoglobin beta chain]	SPVGVQPILNEHTFCAGMSK	8	99
90	spt|P00738|HPT_HUMAN	Haptoglobin precursor [Contains: Haptoglobin alpha chain; Haptoglobin beta chain]	TEGDGVYTLNDKK	8	99
90	spt|P00738|HPT_HUMAN	Haptoglobin precursor [Contains: Haptoglobin alpha chain; Haptoglobin beta chain]	TEGDGVYTLNNEK	9	99
90	spt|P00738|HPT_HUMAN	Haptoglobin precursor [Contains: Haptoglobin alpha chain; Haptoglobin beta chain]	VDSGNDVTDIADDGCPKPPEIAHGYVEHSVR	3	99
90	spt|P00738|HPT_HUMAN	Haptoglobin precursor [Contains: Haptoglobin alpha chain; Haptoglobin beta chain]	VGYVSGWGR	12	99
90	spt|P00738|HPT_HUMAN	Haptoglobin precursor [Contains: Haptoglobin alpha chain; Haptoglobin beta chain]	VMPICLPSK	3	99
90	spt|P00738|HPT_HUMAN	Haptoglobin precursor [Contains: Haptoglobin alpha chain; Haptoglobin beta chain]	VMPICLPSKDYAEVGR	8	99
90	spt|P00738|HPT_HUMAN	Haptoglobin precursor [Contains: Haptoglobin alpha chain; Haptoglobin beta chain]	VTSIQDWVQK	9	99
90	spt|P00738|HPT_HUMAN	Haptoglobin precursor [Contains: Haptoglobin alpha chain; Haptoglobin beta chain]	YVMLPVADQDQCIR	10	99
90	spt|P00738|HPT_HUMAN	Haptoglobin precursor [Contains: Haptoglobin alpha chain; Haptoglobin beta chain]	QKVSVNER	4	96
91	trm|Q8WV32|Q8WV32_HUMAN	TALDO1 protein (Fragment)	AAQASDLEK	8	99
91	trm|Q8WV32|Q8WV32_HUMAN	TALDO1 protein (Fragment)	ALAGCDFLTISPK	11	99
91	trm|Q8WV32|Q8WV32_HUMAN	TALDO1 protein (Fragment)	KFAADAVK	1	99
91	trm|Q8WV32|Q8WV32_HUMAN	TALDO1 protein (Fragment)	LLGELLQDNAK	8	99
91	trm|Q8WV32|Q8WV32_HUMAN	TALDO1 protein (Fragment)	SYEPLEDPGVK	5	99
91	trm|Q8WV32|Q8WV32_HUMAN	TALDO1 protein (Fragment)	TIVMGASFR	8	99
91	trm|Q8WV32|Q8WV32_HUMAN	TALDO1 protein (Fragment)	VSTEVDAR	8	99
91	trm|Q8WV32|Q8WV32_HUMAN	TALDO1 protein (Fragment)	WLHNEDQMAVEK	3	99
91	trm|Q8WV32|Q8WV32_HUMAN	TALDO1 protein (Fragment)	LSFDKDAMVAR	3	96
91	trm|Q8WV32|Q8WV32_HUMAN	TALDO1 protein (Fragment)	LVPVLSAK	6	96
92	trm|Q6GMX4|Q6GMX4_HUMAN	IGLC1 protein	AAPSVTLFPPSSEELQANK	5	99
92	trm|Q6GMX4|Q6GMX4_HUMAN	IGLC1 protein	AGVETTTPSK	2	99
92	trm|Q6GMX4|Q6GMX4_HUMAN	IGLC1 protein	LTVLGQPK	5	99
92	trm|Q6GMX4|Q6GMX4_HUMAN	IGLC1 protein	SYSCQVTHEGSTVEK	2	99
92	trm|Q6GMX4|Q6GMX4_HUMAN	IGLC1 protein	TVAPTECS	5	99
92	trm|Q6GMX4|Q6GMX4_HUMAN	IGLC1 protein	YAASSYLSLTPEQWK	3	99
93	spt|P46940|IQGA1_HUMAN	Ras GTPase-activating-like protein IQGAP1 (p195)	ALQSPALGLR	5	99
93	spt|P46940|IQGA1_HUMAN	Ras GTPase-activating-like protein IQGAP1 (p195)	EQLWLANEGLITR	4	99
93	spt|P46940|IQGA1_HUMAN	Ras GTPase-activating-like protein IQGAP1 (p195)	ILAIGLINEALDEGDAQK	5	99
93	spt|P46940|IQGA1_HUMAN	Ras GTPase-activating-like protein IQGAP1 (p195)	ITLQDVVSHSK	1	99
93	spt|P46940|IQGA1_HUMAN	Ras GTPase-activating-like protein IQGAP1 (p195)	LTAEEMDER	3	99
93	spt|P46940|IQGA1_HUMAN	Ras GTPase-activating-like protein IQGAP1 (p195)	QIPAITCIQSQWR	2	99
93	spt|P46940|IQGA1_HUMAN	Ras GTPase-activating-like protein IQGAP1 (p195)	QSGQTDPLQKEELQSGVDAANSAAQQYQR	2	99
93	spt|P46940|IQGA1_HUMAN	Ras GTPase-activating-like protein IQGAP1 (p195)	SPDVGLYGVIPECGETYHSDLAEAK	3	99
93	spt|P46940|IQGA1_HUMAN	Ras GTPase-activating-like protein IQGAP1 (p195)	TVLELMNPEAQLPQVYPFAADLYQK	3	99
93	spt|P46940|IQGA1_HUMAN	Ras GTPase-activating-like protein IQGAP1 (p195)	EEIQSSISGVTAAYNR	3	98
94	spt|P61981|1433G_HUMAN	14-3-3 protein gamma (Protein kinase C inhibitor protein 1) (KCIP-1)	ATVVESSEK	7	99
94	spt|P61981|1433G_HUMAN	14-3-3 protein gamma (Protein kinase C inhibitor protein 1) (KCIP-1)	AYSEAHEISK	2	99
94	spt|P61981|1433G_HUMAN	14-3-3 protein gamma (Protein kinase C inhibitor protein 1) (KCIP-1)	DSTLIMQLLR	10	99
94	spt|P61981|1433G_HUMAN	14-3-3 protein gamma (Protein kinase C inhibitor protein 1) (KCIP-1)	LAEQAERYDDMAAAMK	7	99
94	spt|P61981|1433G_HUMAN	14-3-3 protein gamma (Protein kinase C inhibitor protein 1) (KCIP-1)	NLLSVAYK	16	99
94	spt|P61981|1433G_HUMAN	14-3-3 protein gamma (Protein kinase C inhibitor protein 1) (KCIP-1)	NLLSVAYKNVVGAR	5	99
94	spt|P61981|1433G_HUMAN	14-3-3 protein gamma (Protein kinase C inhibitor protein 1) (KCIP-1)	NVTELNEPLSNEER	15	99
94	spt|P61981|1433G_HUMAN	14-3-3 protein gamma (Protein kinase C inhibitor protein 1) (KCIP-1)	TAFDDAIAELDTLNEDSYK	5	99
94	spt|P61981|1433G_HUMAN	14-3-3 protein gamma (Protein kinase C inhibitor protein 1) (KCIP-1)	VDREQLVQK	9	99
94	spt|P61981|1433G_HUMAN	14-3-3 protein gamma (Protein kinase C inhibitor protein 1) (KCIP-1)	VISSIEQK	11	99
94	spt|P61981|1433G_HUMAN	14-3-3 protein gamma (Protein kinase C inhibitor protein 1) (KCIP-1)	YDDMAAAMK	9	99
94	spt|P61981|1433G_HUMAN	14-3-3 protein gamma (Protein kinase C inhibitor protein 1) (KCIP-1)	YLAEVATGEK	2	99
94	spt|P61981|1433G_HUMAN	14-3-3 protein gamma (Protein kinase C inhibitor protein 1) (KCIP-1)	YLAEVATGEKR	3	99
95	spt|P31150|GDIA_HUMAN	Rab GDP dissociation inhibitor alpha (Rab GDI alpha) (Guanosine diphosphate dissociation inhibitor 1) (GDI-1) (XAP-4) (Oligophrenin- 2)	FQLLEGPPESMGR	1	99
95	spt|P31150|GDIA_HUMAN	Rab GDP dissociation inhibitor alpha (Rab GDI alpha) (Guanosine diphosphate dissociation inhibitor 1) (GDI-1) (XAP-4) (Oligophrenin- 2)	IICILSHPIK	1	99
95	spt|P31150|GDIA_HUMAN	Rab GDP dissociation inhibitor alpha (Rab GDI alpha) (Guanosine diphosphate dissociation inhibitor 1) (GDI-1) (XAP-4) (Oligophrenin- 2)	LYSESLAR	3	99
95	spt|P31150|GDIA_HUMAN	Rab GDP dissociation inhibitor alpha (Rab GDI alpha) (Guanosine diphosphate dissociation inhibitor 1) (GDI-1) (XAP-4) (Oligophrenin- 2)	NPYYGGESSSITPLEELYK	1	99
95	spt|P31150|GDIA_HUMAN	Rab GDP dissociation inhibitor alpha (Rab GDI alpha) (Guanosine diphosphate dissociation inhibitor 1) (GDI-1) (XAP-4) (Oligophrenin- 2)	SPYLYPLYGLGELPQGFAR	3	99
95	spt|P31150|GDIA_HUMAN	Rab GDP dissociation inhibitor alpha (Rab GDI alpha) (Guanosine diphosphate dissociation inhibitor 1) (GDI-1) (XAP-4) (Oligophrenin- 2)	MLLYTEVTR	1	97
95	spt|P31150|GDIA_HUMAN	Rab GDP dissociation inhibitor alpha (Rab GDI alpha) (Guanosine diphosphate dissociation inhibitor 1) (GDI-1) (XAP-4) (Oligophrenin- 2)	TDDYLDQPCLETVNR	1	97
96	trm|Q53FB6|Q53FB6_HUMAN	Mitochondrial aldehyde dehydrogenase 2 variant (Fragment)	AAFQLGSPWR	3	99
96	trm|Q53FB6|Q53FB6_HUMAN	Mitochondrial aldehyde dehydrogenase 2 variant (Fragment)	LLCGGGIAADR	7	99
96	trm|Q53FB6|Q53FB6_HUMAN	Mitochondrial aldehyde dehydrogenase 2 variant (Fragment)	TFVQEDIYDEFVER	6	99
96	trm|Q53FB6|Q53FB6_HUMAN	Mitochondrial aldehyde dehydrogenase 2 variant (Fragment)	TIPIDGDFFSYTR	5	99
96	trm|Q53FB6|Q53FB6_HUMAN	Mitochondrial aldehyde dehydrogenase 2 variant (Fragment)	VAEQTPLTALYVANLIK	4	99
96	trm|Q53FB6|Q53FB6_HUMAN	Mitochondrial aldehyde dehydrogenase 2 variant (Fragment)	VTLELGGK	5	99
97	spt|Q86VP6|CAND1_HUMAN	Cullin-associated NEDD8-dissociated protein 1 (Cullin-associated and neddylation-dissociated protein 1) (p120 CAND1) (TBP-interacting protein TIP120A) (TBP-interacting protein of 120 kDa A)	CLDAVVSTR	1	99
97	spt|Q86VP6|CAND1_HUMAN	Cullin-associated NEDD8-dissociated protein 1 (Cullin-associated and neddylation-dissociated protein 1) (p120 CAND1) (TBP-interacting protein TIP120A) (TBP-interacting protein of 120 kDa A)	EGPAVVGQFIQDVK	5	99
97	spt|Q86VP6|CAND1_HUMAN	Cullin-associated NEDD8-dissociated protein 1 (Cullin-associated and neddylation-dissociated protein 1) (p120 CAND1) (TBP-interacting protein TIP120A) (TBP-interacting protein of 120 kDa A)	ITSEALLVTQQLVK	2	99
97	spt|Q86VP6|CAND1_HUMAN	Cullin-associated NEDD8-dissociated protein 1 (Cullin-associated and neddylation-dissociated protein 1) (p120 CAND1) (TBP-interacting protein TIP120A) (TBP-interacting protein of 120 kDa A)	SVILEAFSSPSEEVK	1	99
97	spt|Q86VP6|CAND1_HUMAN	Cullin-associated NEDD8-dissociated protein 1 (Cullin-associated and neddylation-dissociated protein 1) (p120 CAND1) (TBP-interacting protein TIP120A) (TBP-interacting protein of 120 kDa A)	TVSPALISR	4	99
97	spt|Q86VP6|CAND1_HUMAN	Cullin-associated NEDD8-dissociated protein 1 (Cullin-associated and neddylation-dissociated protein 1) (p120 CAND1) (TBP-interacting protein TIP120A) (TBP-interacting protein of 120 kDa A)	AVAALLTIPEAEK	3	97
97	spt|Q86VP6|CAND1_HUMAN	Cullin-associated NEDD8-dissociated protein 1 (Cullin-associated and neddylation-dissociated protein 1) (p120 CAND1) (TBP-interacting protein TIP120A) (TBP-interacting protein of 120 kDa A)	MLTGPVYSQSTALTHK	2	95
98	spt|P67936|TPM4_HUMAN	Tropomyosin alpha-4 chain (Tropomyosin-4) (TM30p1)	AEGDVAALNR	4	99
98	spt|P67936|TPM4_HUMAN	Tropomyosin alpha-4 chain (Tropomyosin-4) (TM30p1)	AGLNSLEAVK	5	99
98	spt|P67936|TPM4_HUMAN	Tropomyosin alpha-4 chain (Tropomyosin-4) (TM30p1)	AGLNSLEAVKR	5	99
98	spt|P67936|TPM4_HUMAN	Tropomyosin alpha-4 chain (Tropomyosin-4) (TM30p1)	EENVGLHQTLDQTLNELNCI	3	99
98	spt|P67936|TPM4_HUMAN	Tropomyosin alpha-4 chain (Tropomyosin-4) (TM30p1)	IQALQQQADEAEDR	2	99
98	spt|P67936|TPM4_HUMAN	Tropomyosin alpha-4 chain (Tropomyosin-4) (TM30p1)	IQLVEEELDR	5	99
98	spt|P67936|TPM4_HUMAN	Tropomyosin alpha-4 chain (Tropomyosin-4) (TM30p1)	IQLVEEELDRAQER	3	99
98	spt|P67936|TPM4_HUMAN	Tropomyosin alpha-4 chain (Tropomyosin-4) (TM30p1)	KIQALQQQADEAEDR	2	99
98	spt|P67936|TPM4_HUMAN	Tropomyosin alpha-4 chain (Tropomyosin-4) (TM30p1)	KLVILEGELER	2	99
98	spt|P67936|TPM4_HUMAN	Tropomyosin alpha-4 chain (Tropomyosin-4) (TM30p1)	LATALQKLEEAEK	2	99
98	spt|P67936|TPM4_HUMAN	Tropomyosin alpha-4 chain (Tropomyosin-4) (TM30p1)	LEEAEKAADESER	1	99
98	spt|P67936|TPM4_HUMAN	Tropomyosin alpha-4 chain (Tropomyosin-4) (TM30p1)	LVILEGELER	2	99
98	spt|P67936|TPM4_HUMAN	Tropomyosin alpha-4 chain (Tropomyosin-4) (TM30p1)	RIQLVEEELDR	2	99
98	spt|P67936|TPM4_HUMAN	Tropomyosin alpha-4 chain (Tropomyosin-4) (TM30p1)	RIQLVEEELDRAQER	2	99
98	spt|P67936|TPM4_HUMAN	Tropomyosin alpha-4 chain (Tropomyosin-4) (TM30p1)	SLEAASEK	2	99
98	spt|P67936|TPM4_HUMAN	Tropomyosin alpha-4 chain (Tropomyosin-4) (TM30p1)	TIDDLEEK	2	99
99	trm|Q59GB4|Q59GB4_HUMAN	Dihydropyrimidinase-like 2 variant (Fragment)	AITIANQTNCPLYITK	7	99
99	trm|Q59GB4|Q59GB4_HUMAN	Dihydropyrimidinase-like 2 variant (Fragment)	FQMPDQGMTSADDFFQGTK	5	99
99	trm|Q59GB4|Q59GB4_HUMAN	Dihydropyrimidinase-like 2 variant (Fragment)	GSPLVVISQGK	6	99
[truncated: 4,489 more rows]

## Sheet: S3B - Peptides_confidences >=99
B - Identified peptides whose Proteinpilot confidence was greater than 99%
#Occurences = number of times a particular peptide has been identified over all samples sets
Protein Number	Accession	Protein Name	Peptide	#Occurences	Max Confidence
1	trm|Q5HY55|Q5HY55_HUMAN	"Filamin A, alpha (Actin binding protein 280) "	AEAGVPAEFSIWTR	13	99
1	trm|Q5HY55|Q5HY55_HUMAN	"Filamin A, alpha (Actin binding protein 280) "	AEFTVETR	14	99
1	trm|Q5HY55|Q5HY55_HUMAN	"Filamin A, alpha (Actin binding protein 280) "	AEISFEDR	6	99
1	trm|Q5HY55|Q5HY55_HUMAN	"Filamin A, alpha (Actin binding protein 280) "	AEISFEDRK	9	99
1	trm|Q5HY55|Q5HY55_HUMAN	"Filamin A, alpha (Actin binding protein 280) "	AFGPGLQGGSAGSPAR	20	99
1	trm|Q5HY55|Q5HY55_HUMAN	"Filamin A, alpha (Actin binding protein 280) "	AFGPGLQGGSAGSPARFTIDTK	13	99
1	trm|Q5HY55|Q5HY55_HUMAN	"Filamin A, alpha (Actin binding protein 280) "	AGGPGLER	8	99
1	trm|Q5HY55|Q5HY55_HUMAN	"Filamin A, alpha (Actin binding protein 280) "	AGNNMLLVGVHGPR	13	99
1	trm|Q5HY55|Q5HY55_HUMAN	"Filamin A, alpha (Actin binding protein 280) "	AGQSAAGAAPGGGVDTR	19	99
1	trm|Q5HY55|Q5HY55_HUMAN	"Filamin A, alpha (Actin binding protein 280) "	AGVAPLQVK	18	99
1	trm|Q5HY55|Q5HY55_HUMAN	"Filamin A, alpha (Actin binding protein 280) "	AHVVPCFDASK	8	99
1	trm|Q5HY55|Q5HY55_HUMAN	"Filamin A, alpha (Actin binding protein 280) "	ALTQTGGPHVK	15	99
1	trm|Q5HY55|Q5HY55_HUMAN	"Filamin A, alpha (Actin binding protein 280) "	ANLPQSFQVDTSK	10	99
1	trm|Q5HY55|Q5HY55_HUMAN	"Filamin A, alpha (Actin binding protein 280) "	ASGPGLNTTGVPASLPVEFTIDAK	12	99
1	trm|Q5HY55|Q5HY55_HUMAN	"Filamin A, alpha (Actin binding protein 280) "	ATCAPQHGAPGPGPADASK	10	99
1	trm|Q5HY55|Q5HY55_HUMAN	"Filamin A, alpha (Actin binding protein 280) "	AWGPGLEGGVVGK	12	99
1	trm|Q5HY55|Q5HY55_HUMAN	"Filamin A, alpha (Actin binding protein 280) "	AYGPGIEPTGNMVK	15	99
1	trm|Q5HY55|Q5HY55_HUMAN	"Filamin A, alpha (Actin binding protein 280) "	CAPGVVGPAEADIDFDIIR	13	99
1	trm|Q5HY55|Q5HY55_HUMAN	"Filamin A, alpha (Actin binding protein 280) "	CSGPGLER	8	99
1	trm|Q5HY55|Q5HY55_HUMAN	"Filamin A, alpha (Actin binding protein 280) "	CSGPGLSPGMVR	4	99
1	trm|Q5HY55|Q5HY55_HUMAN	"Filamin A, alpha (Actin binding protein 280) "	CSYQPTMEGVHTVHVTFAGVPIPR	6	99
1	trm|Q5HY55|Q5HY55_HUMAN	"Filamin A, alpha (Actin binding protein 280) "	DAEMPATEKDLAEDAPWKK	2	99
1	trm|Q5HY55|Q5HY55_HUMAN	"Filamin A, alpha (Actin binding protein 280) "	DAGEGGLSLAIEGPSK	9	99
1	trm|Q5HY55|Q5HY55_HUMAN	"Filamin A, alpha (Actin binding protein 280) "	DAGEGLLAVQITDPEGKPK	12	99
1	trm|Q5HY55|Q5HY55_HUMAN	"Filamin A, alpha (Actin binding protein 280) "	DAPQDFHPDR	11	99
1	trm|Q5HY55|Q5HY55_HUMAN	"Filamin A, alpha (Actin binding protein 280) "	DGSCGVAYVVQEPGDYEVSVK	4	99
1	trm|Q5HY55|Q5HY55_HUMAN	"Filamin A, alpha (Actin binding protein 280) "	DKGEYTLVVK	7	99
1	trm|Q5HY55|Q5HY55_HUMAN	"Filamin A, alpha (Actin binding protein 280) "	DNGNGTYSCSYVPR	4	99
1	trm|Q5HY55|Q5HY55_HUMAN	"Filamin A, alpha (Actin binding protein 280) "	DVDIIDHHDNTYTVK	8	99
1	trm|Q5HY55|Q5HY55_HUMAN	"Filamin A, alpha (Actin binding protein 280) "	EAGAGGLAIAVEGPSK	14	99
1	trm|Q5HY55|Q5HY55_HUMAN	"Filamin A, alpha (Actin binding protein 280) "	EATTEFSVDAR	14	99
1	trm|Q5HY55|Q5HY55_HUMAN	"Filamin A, alpha (Actin binding protein 280) "	EGPYSISVLYGDEEVPR	9	99
1	trm|Q5HY55|Q5HY55_HUMAN	"Filamin A, alpha (Actin binding protein 280) "	ETGEHLVHVK	5	99
1	trm|Q5HY55|Q5HY55_HUMAN	"Filamin A, alpha (Actin binding protein 280) "	FGGEHVPNSPFQVTALAGDQPSVQPPLR	8	99
1	trm|Q5HY55|Q5HY55_HUMAN	"Filamin A, alpha (Actin binding protein 280) "	FNEEHIPDSPFVVPVASPSGDAR	13	99
1	trm|Q5HY55|Q5HY55_HUMAN	"Filamin A, alpha (Actin binding protein 280) "	FNGTHIPGSPFK	15	99
1	trm|Q5HY55|Q5HY55_HUMAN	"Filamin A, alpha (Actin binding protein 280) "	GAGSGELK	2	99
1	trm|Q5HY55|Q5HY55_HUMAN	"Filamin A, alpha (Actin binding protein 280) "	GAGTGGLGLAVEGPSEAK	14	99
1	trm|Q5HY55|Q5HY55_HUMAN	"Filamin A, alpha (Actin binding protein 280) "	GKLDVQFSGLTK	5	99
1	trm|Q5HY55|Q5HY55_HUMAN	"Filamin A, alpha (Actin binding protein 280) "	GLVEPVDVVDNADGTQTVNYVPSR	18	99
1	trm|Q5HY55|Q5HY55_HUMAN	"Filamin A, alpha (Actin binding protein 280) "	GQHVPGSPFQFTVGPLGEGGAHK	7	99
1	trm|Q5HY55|Q5HY55_HUMAN	"Filamin A, alpha (Actin binding protein 280) "	GTVEPQLEAR	15	99
1	trm|Q5HY55|Q5HY55_HUMAN	"Filamin A, alpha (Actin binding protein 280) "	HTAMVSWGGVSIPNSPFR	9	99
1	trm|Q5HY55|Q5HY55_HUMAN	"Filamin A, alpha (Actin binding protein 280) "	IANLQTDLSDGLR	15	99
1	trm|Q5HY55|Q5HY55_HUMAN	"Filamin A, alpha (Actin binding protein 280) "	IECDDKGDGSCDVR	2	99
1	trm|Q5HY55|Q5HY55_HUMAN	"Filamin A, alpha (Actin binding protein 280) "	IKVSGLGEK	11	99
1	trm|Q5HY55|Q5HY55_HUMAN	"Filamin A, alpha (Actin binding protein 280) "	IQQNTFTR	11	99
1	trm|Q5HY55|Q5HY55_HUMAN	"Filamin A, alpha (Actin binding protein 280) "	IVGPSGAAVPCK	10	99
1	trm|Q5HY55|Q5HY55_HUMAN	"Filamin A, alpha (Actin binding protein 280) "	IVGPSGAAVPCKVEPGLGADNSVVR	11	99
1	trm|Q5HY55|Q5HY55_HUMAN	"Filamin A, alpha (Actin binding protein 280) "	KGEITGEVR	4	99
1	trm|Q5HY55|Q5HY55_HUMAN	"Filamin A, alpha (Actin binding protein 280) "	KIQQNTFTR	1	99
1	trm|Q5HY55|Q5HY55_HUMAN	"Filamin A, alpha (Actin binding protein 280) "	KNGQHVASSPIPVVISQSEIGDASR	5	99
1	trm|Q5HY55|Q5HY55_HUMAN	"Filamin A, alpha (Actin binding protein 280) "	LIALLEVLSQK	3	99
1	trm|Q5HY55|Q5HY55_HUMAN	"Filamin A, alpha (Actin binding protein 280) "	LIALLEVLSQKK	2	99
1	trm|Q5HY55|Q5HY55_HUMAN	"Filamin A, alpha (Actin binding protein 280) "	LLGWIQNK	5	99
1	trm|Q5HY55|Q5HY55_HUMAN	"Filamin A, alpha (Actin binding protein 280) "	LQVEPAVDTSGVQCYGPGIEGQGVFR	12	99
1	trm|Q5HY55|Q5HY55_HUMAN	"Filamin A, alpha (Actin binding protein 280) "	LSPFMADIR	16	99
1	trm|Q5HY55|Q5HY55_HUMAN	"Filamin A, alpha (Actin binding protein 280) "	LYSVSYLLK	7	99
1	trm|Q5HY55|Q5HY55_HUMAN	"Filamin A, alpha (Actin binding protein 280) "	NGHVGISFVPK	8	99
1	trm|Q5HY55|Q5HY55_HUMAN	"Filamin A, alpha (Actin binding protein 280) "	RLTVSSLQESGLK	4	99
1	trm|Q5HY55|Q5HY55_HUMAN	"Filamin A, alpha (Actin binding protein 280) "	SAGQGEVLVYVEDPAGHQEEAK	11	99
1	trm|Q5HY55|Q5HY55_HUMAN	"Filamin A, alpha (Actin binding protein 280) "	SPFEVYVDK	7	99
1	trm|Q5HY55|Q5HY55_HUMAN	"Filamin A, alpha (Actin binding protein 280) "	SPFSVAVSPSLDLSK	18	99
1	trm|Q5HY55|Q5HY55_HUMAN	"Filamin A, alpha (Actin binding protein 280) "	SPYTVTVGQACNPSACR	14	99
1	trm|Q5HY55|Q5HY55_HUMAN	"Filamin A, alpha (Actin binding protein 280) "	SSFTVDCSK	3	99
1	trm|Q5HY55|Q5HY55_HUMAN	"Filamin A, alpha (Actin binding protein 280) "	TFSVWYVPEVTGTHK	9	99
1	trm|Q5HY55|Q5HY55_HUMAN	"Filamin A, alpha (Actin binding protein 280) "	TGVAVNKPAEFTVDAK	11	99
1	trm|Q5HY55|Q5HY55_HUMAN	"Filamin A, alpha (Actin binding protein 280) "	TGVELGKPTHFTVNAK	9	99
1	trm|Q5HY55|Q5HY55_HUMAN	"Filamin A, alpha (Actin binding protein 280) "	TPCEEILVK	7	99
1	trm|Q5HY55|Q5HY55_HUMAN	"Filamin A, alpha (Actin binding protein 280) "	VANPSGNLTETYVQDR	20	99
1	trm|Q5HY55|Q5HY55_HUMAN	"Filamin A, alpha (Actin binding protein 280) "	VAQPTITDNKDGTVTVR	12	99
1	trm|Q5HY55|Q5HY55_HUMAN	"Filamin A, alpha (Actin binding protein 280) "	VDVGKDQEFTVK	5	99
1	trm|Q5HY55|Q5HY55_HUMAN	"Filamin A, alpha (Actin binding protein 280) "	VEPGLGADNSVVR	12	99
1	trm|Q5HY55|Q5HY55_HUMAN	"Filamin A, alpha (Actin binding protein 280) "	VEYTPYEEGLHSVDVTYDGSPVPSSPFQVPVTEGCDPSR	3	99
1	trm|Q5HY55|Q5HY55_HUMAN	"Filamin A, alpha (Actin binding protein 280) "	VGSAADIPINISETDLSLLTATVVPPSGR	10	99
1	trm|Q5HY55|Q5HY55_HUMAN	"Filamin A, alpha (Actin binding protein 280) "	VHGPGIQSGTTNKPNK	12	99
1	trm|Q5HY55|Q5HY55_HUMAN	"Filamin A, alpha (Actin binding protein 280) "	VHSPSGALEECYVTEIDQDK	5	99
1	trm|Q5HY55|Q5HY55_HUMAN	"Filamin A, alpha (Actin binding protein 280) "	VKAEGPGLSR	7	99
1	trm|Q5HY55|Q5HY55_HUMAN	"Filamin A, alpha (Actin binding protein 280) "	VKETADFK	10	99
1	trm|Q5HY55|Q5HY55_HUMAN	"Filamin A, alpha (Actin binding protein 280) "	VKVEPSHDASK	11	99
1	trm|Q5HY55|Q5HY55_HUMAN	"Filamin A, alpha (Actin binding protein 280) "	VLPTHDASK	5	99
1	trm|Q5HY55|Q5HY55_HUMAN	"Filamin A, alpha (Actin binding protein 280) "	VNQPASFAVSLNGAK	17	99
1	trm|Q5HY55|Q5HY55_HUMAN	"Filamin A, alpha (Actin binding protein 280) "	VNVGAGSHPNKVK	7	99
1	trm|Q5HY55|Q5HY55_HUMAN	"Filamin A, alpha (Actin binding protein 280) "	VPVHDVTDASK	6	99
1	trm|Q5HY55|Q5HY55_HUMAN	"Filamin A, alpha (Actin binding protein 280) "	VQVQDNEGCPVEALVK	9	99
1	trm|Q5HY55|Q5HY55_HUMAN	"Filamin A, alpha (Actin binding protein 280) "	VTAQGPGLEPSGNIANK	14	99
1	trm|Q5HY55|Q5HY55_HUMAN	"Filamin A, alpha (Actin binding protein 280) "	VTVLFAGQHIAK	17	99
1	trm|Q5HY55|Q5HY55_HUMAN	"Filamin A, alpha (Actin binding protein 280) "	VTYTPMAPGSYLISIK	10	99
1	trm|Q5HY55|Q5HY55_HUMAN	"Filamin A, alpha (Actin binding protein 280) "	VYGPGVAK	8	99
1	trm|Q5HY55|Q5HY55_HUMAN	"Filamin A, alpha (Actin binding protein 280) "	YAPSEAGLHEMDIR	11	99
1	trm|Q5HY55|Q5HY55_HUMAN	"Filamin A, alpha (Actin binding protein 280) "	YGGDEIPFSPYR	13	99
1	trm|Q5HY55|Q5HY55_HUMAN	"Filamin A, alpha (Actin binding protein 280) "	YGGPYHIGGSPFK	8	99
1	trm|Q5HY55|Q5HY55_HUMAN	"Filamin A, alpha (Actin binding protein 280) "	YNEQHVPGSPFTAR	14	99
1	trm|Q5HY55|Q5HY55_HUMAN	"Filamin A, alpha (Actin binding protein 280) "	YTPVQQGPVGVNVTYGGD	1	99
1	trm|Q5HY55|Q5HY55_HUMAN	"Filamin A, alpha (Actin binding protein 280) "	YTPVQQGPVGVNVTYGGDPIPK	13	99
1	trm|Q5HY55|Q5HY55_HUMAN	"Filamin A, alpha (Actin binding protein 280) "	YWPQEAGEYAVHVLCNSEDIR	3	99
2	spt|Q9Y490|TLN1_HUMAN	Talin-1	AATAPLLEAVDNLSAFASNPEFSSIPAQISPEGR	3	99
2	spt|Q9Y490|TLN1_HUMAN	Talin-1	ADAEGESDLENSR	5	99
2	spt|Q9Y490|TLN1_HUMAN	Talin-1	ALDGAFTEENR	6	99
2	spt|Q9Y490|TLN1_HUMAN	Talin-1	ALEATTEHIR	4	99
2	spt|Q9Y490|TLN1_HUMAN	Talin-1	AQEACGPLEMDSALSVVQNLEK	6	99
2	spt|Q9Y490|TLN1_HUMAN	Talin-1	ASAGPQPLLVQSCK	9	99
2	spt|Q9Y490|TLN1_HUMAN	Talin-1	AVAEQIPLLVQGVR	11	99
2	spt|Q9Y490|TLN1_HUMAN	Talin-1	AVEDEATKGTR	1	99
2	spt|Q9Y490|TLN1_HUMAN	Talin-1	AVTDSINQLITMCTQQAPGQK	7	99
2	spt|Q9Y490|TLN1_HUMAN	Talin-1	DPPSWSVLAGHSR	5	99
2	spt|Q9Y490|TLN1_HUMAN	Talin-1	EAAYHPEVAPDVR	8	99
2	spt|Q9Y490|TLN1_HUMAN	Talin-1	EADESLNFEEQILEAAK	1	99
2	spt|Q9Y490|TLN1_HUMAN	Talin-1	EQGVEEHETLLLR	4	99
2	spt|Q9Y490|TLN1_HUMAN	Talin-1	FLPSELRDEH	3	99
2	spt|Q9Y490|TLN1_HUMAN	Talin-1	GAAAHPDSEEQQQR	5	99
2	spt|Q9Y490|TLN1_HUMAN	Talin-1	GLAGAVSELLR	6	99
2	spt|Q9Y490|TLN1_HUMAN	Talin-1	GSQAQPDSPSAQLALIAASQSFLQPGGK	10	99
2	spt|Q9Y490|TLN1_HUMAN	Talin-1	GTEWVDPEDPTVIAENELLGAAAAIEAAAK	1	99
2	spt|Q9Y490|TLN1_HUMAN	Talin-1	GVAALTSDPAVQAIVLDTASDVLDK	5	99
2	spt|Q9Y490|TLN1_HUMAN	Talin-1	IGITNHDEYSLVR	2	99
2	spt|Q9Y490|TLN1_HUMAN	Talin-1	ILAQATSDLVNAIK	11	99
2	spt|Q9Y490|TLN1_HUMAN	Talin-1	LAQAAQSSVATITR	9	99
2	spt|Q9Y490|TLN1_HUMAN	Talin-1	LASEAKPAAVAAENEEIGSHIK	3	99
2	spt|Q9Y490|TLN1_HUMAN	Talin-1	LLAALLEDEGGSGRPLLQAAK	4	99
2	spt|Q9Y490|TLN1_HUMAN	Talin-1	LLSDSLPPSTGTFQEAQSR	8	99
2	spt|Q9Y490|TLN1_HUMAN	Talin-1	LNEAAAGLNQAATELVQASR	19	99
2	spt|Q9Y490|TLN1_HUMAN	Talin-1	MVGGIAQIIAAQEEMLR	7	99
2	spt|Q9Y490|TLN1_HUMAN	Talin-1	NLGTALAELR	14	99
2	spt|Q9Y490|TLN1_HUMAN	Talin-1	QAAASATQTIAAAQHAASTPK	17	99
2	spt|Q9Y490|TLN1_HUMAN	Talin-1	QELAVFCSPEPPAK	3	99
2	spt|Q9Y490|TLN1_HUMAN	Talin-1	SNTSPEELGPLANQLTSDYGR	6	99
2	spt|Q9Y490|TLN1_HUMAN	Talin-1	TLAESALQLLYTAK	8	99
2	spt|Q9Y490|TLN1_HUMAN	Talin-1	TLSHPQQMALLDQTK	5	99
2	spt|Q9Y490|TLN1_HUMAN	Talin-1	TMLESAGGLIQTAR	11	99
2	spt|Q9Y490|TLN1_HUMAN	Talin-1	TSTPEDFIR	7	99
2	spt|Q9Y490|TLN1_HUMAN	Talin-1	TVTDMLMTICAR	6	99
2	spt|Q9Y490|TLN1_HUMAN	Talin-1	VAGSVTELIQAAEAMK	5	99
2	spt|Q9Y490|TLN1_HUMAN	Talin-1	VGAIPANALDDGQWSQGLISAAR	14	99
2	spt|Q9Y490|TLN1_HUMAN	Talin-1	VLVQNAAGSQEK	5	99
2	spt|Q9Y490|TLN1_HUMAN	Talin-1	VQELGHGCAALVTK	2	99
2	spt|Q9Y490|TLN1_HUMAN	Talin-1	VSHVLAALQAGNR	4	99
2	spt|Q9Y490|TLN1_HUMAN	Talin-1	VSQMAQYFEPLTLAAVGAASK	6	99
2	spt|Q9Y490|TLN1_HUMAN	Talin-1	VVAPTISSPVCQEQLVEAGR	5	99
3	spt|P02768|ALBU_HUMAN	Serum albumin precursor	AACLLPK	15	99
3	spt|P02768|ALBU_HUMAN	Serum albumin precursor	AAFTECCQAADK	13	99
3	spt|P02768|ALBU_HUMAN	Serum albumin precursor	ADDKETCFAEEGK	9	99
3	spt|P02768|ALBU_HUMAN	Serum albumin precursor	ADDKETCFAEEGKK	11	99
3	spt|P02768|ALBU_HUMAN	Serum albumin precursor	AEFAEVSK	15	99
3	spt|P02768|ALBU_HUMAN	Serum albumin precursor	AEFAEVSKLVTDLTK	9	99
3	spt|P02768|ALBU_HUMAN	Serum albumin precursor	AFKAWAVAR	11	99
3	spt|P02768|ALBU_HUMAN	Serum albumin precursor	AVMDDFAAFVEK	15	99
3	spt|P02768|ALBU_HUMAN	Serum albumin precursor	CCAAADPHECYAK	9	99
3	spt|P02768|ALBU_HUMAN	Serum albumin precursor	CCTESLVNR	10	99
3	spt|P02768|ALBU_HUMAN	Serum albumin precursor	CIAEVENDEMPADLPSLAADFVESK	4	99
3	spt|P02768|ALBU_HUMAN	Serum albumin precursor	CTAFHDNEETFLK	4	99
3	spt|P02768|ALBU_HUMAN	Serum albumin precursor	DAHKSEVAHR	6	99
3	spt|P02768|ALBU_HUMAN	Serum albumin precursor	DDNPNLPR	14	99
3	spt|P02768|ALBU_HUMAN	Serum albumin precursor	DEMPADLPSLAADFVESK	9	99
3	spt|P02768|ALBU_HUMAN	Serum albumin precursor	DLGEENFK	3	99
3	spt|P02768|ALBU_HUMAN	Serum albumin precursor	DVCKNYAEAK	6	99
3	spt|P02768|ALBU_HUMAN	Serum albumin precursor	DVFLGMFLYEYAR	10	99
3	spt|P02768|ALBU_HUMAN	Serum albumin precursor	ECCEKPLLEK	9	99
3	spt|P02768|ALBU_HUMAN	Serum albumin precursor	EFNAETFTFHADICTLSEK	7	99
3	spt|P02768|ALBU_HUMAN	Serum albumin precursor	ETYGEMADCCAK	14	99
3	spt|P02768|ALBU_HUMAN	Serum albumin precursor	FDEFKPLVEEPQNLIK	1	99
3	spt|P02768|ALBU_HUMAN	Serum albumin precursor	FKDLGEENFK	9	99
3	spt|P02768|ALBU_HUMAN	Serum albumin precursor	FPKAEFAEVSK	5	99
3	spt|P02768|ALBU_HUMAN	Serum albumin precursor	FQNALLVR	15	99
3	spt|P02768|ALBU_HUMAN	Serum albumin precursor	FSALEVDETYVPK	1	99
3	spt|P02768|ALBU_HUMAN	Serum albumin precursor	FYAPELLFFAK	6	99
3	spt|P02768|ALBU_HUMAN	Serum albumin precursor	HADICTLSEK	2	99
3	spt|P02768|ALBU_HUMAN	Serum albumin precursor	HPDYSVVLLLR	3	99
3	spt|P02768|ALBU_HUMAN	Serum albumin precursor	HPYFYAPELLFFAK	4	99
3	spt|P02768|ALBU_HUMAN	Serum albumin precursor	KLVAASQAALG	4	99
3	spt|P02768|ALBU_HUMAN	Serum albumin precursor	KLVAASQAALGL	14	99
3	spt|P02768|ALBU_HUMAN	Serum albumin precursor	KQTALVELVK	14	99
3	spt|P02768|ALBU_HUMAN	Serum albumin precursor	KVPQVSTPTLVEVSR	14	99
3	spt|P02768|ALBU_HUMAN	Serum albumin precursor	KYLYEIAR	11	99
3	spt|P02768|ALBU_HUMAN	Serum albumin precursor	LAKTYETTLEK	3	99
3	spt|P02768|ALBU_HUMAN	Serum albumin precursor	LCTVATLR	12	99
3	spt|P02768|ALBU_HUMAN	Serum albumin precursor	LDELRDEGK	14	99
3	spt|P02768|ALBU_HUMAN	Serum albumin precursor	LDELRDEGKASSAK	6	99
3	spt|P02768|ALBU_HUMAN	Serum albumin precursor	LKCASLQK	5	99
3	spt|P02768|ALBU_HUMAN	Serum albumin precursor	LKECCEKPLLEK	6	99
3	spt|P02768|ALBU_HUMAN	Serum albumin precursor	LVAASQAAL	15	99
3	spt|P02768|ALBU_HUMAN	Serum albumin precursor	LVAASQAALG	15	99
3	spt|P02768|ALBU_HUMAN	Serum albumin precursor	LVAASQAALGL	15	99
3	spt|P02768|ALBU_HUMAN	Serum albumin precursor	LVNEVTEFAK	15	99
3	spt|P02768|ALBU_HUMAN	Serum albumin precursor	LVRPEVDVM	7	99
3	spt|P02768|ALBU_HUMAN	Serum albumin precursor	LVRPEVDVMCTAFHDNEETFLK	6	99
3	spt|P02768|ALBU_HUMAN	Serum albumin precursor	LVRPEVDVMCTAFHDNEETFLKK	4	99
3	spt|P02768|ALBU_HUMAN	Serum albumin precursor	NECFLQHK	9	99
3	spt|P02768|ALBU_HUMAN	Serum albumin precursor	NECFLQHKDDNPNLPR	9	99
3	spt|P02768|ALBU_HUMAN	Serum albumin precursor	NLGKVGSK	4	99
3	spt|P02768|ALBU_HUMAN	Serum albumin precursor	QEPERNECFLQHK	9	99
3	spt|P02768|ALBU_HUMAN	Serum albumin precursor	QEPERNECFLQHKDDN	2	99
3	spt|P02768|ALBU_HUMAN	Serum albumin precursor	QEPERNECFLQHKDDNP	2	99
3	spt|P02768|ALBU_HUMAN	Serum albumin precursor	QEPERNECFLQHKDDNPNLPR	14	99
3	spt|P02768|ALBU_HUMAN	Serum albumin precursor	QNCELFEQLGEYK	12	99
3	spt|P02768|ALBU_HUMAN	Serum albumin precursor	QTALVELVK	15	99
3	spt|P02768|ALBU_HUMAN	Serum albumin precursor	QVSTPTLVEVSR	4	99
3	spt|P02768|ALBU_HUMAN	Serum albumin precursor	RHPDYSVVLLLR	6	99
3	spt|P02768|ALBU_HUMAN	Serum albumin precursor	RHPYFYAPELLFFAK	4	99
3	spt|P02768|ALBU_HUMAN	Serum albumin precursor	RPCFSALEVDETYVPK	13	99
3	spt|P02768|ALBU_HUMAN	Serum albumin precursor	SHCIAEVENDEMPADLPSLAADFVESK	8	99
3	spt|P02768|ALBU_HUMAN	Serum albumin precursor	SHCIAEVENDEMPADLPSLAADFVESKDVCK	3	99
3	spt|P02768|ALBU_HUMAN	Serum albumin precursor	SLHTLFGDK	9	99
3	spt|P02768|ALBU_HUMAN	Serum albumin precursor	SLHTLFGDKLCTVATLR	4	99
3	spt|P02768|ALBU_HUMAN	Serum albumin precursor	TCVADESAENCDK	11	99
3	spt|P02768|ALBU_HUMAN	Serum albumin precursor	TECCHGDLLECADDR	7	99
3	spt|P02768|ALBU_HUMAN	Serum albumin precursor	TECCHGDLLECADDRADLAK	3	99
3	spt|P02768|ALBU_HUMAN	Serum albumin precursor	TFHADICTLSEK	5	99
3	spt|P02768|ALBU_HUMAN	Serum albumin precursor	TPVSDRVTK	7	99
3	spt|P02768|ALBU_HUMAN	Serum albumin precursor	TYETTLEK	15	99
3	spt|P02768|ALBU_HUMAN	Serum albumin precursor	VFDEFKPLVEE	3	99
3	spt|P02768|ALBU_HUMAN	Serum albumin precursor	VFDEFKPLVEEPQN	4	99
3	spt|P02768|ALBU_HUMAN	Serum albumin precursor	VFDEFKPLVEEPQNLIK	13	99
3	spt|P02768|ALBU_HUMAN	Serum albumin precursor	VHTECCHGDLLECADDR	8	99
3	spt|P02768|ALBU_HUMAN	Serum albumin precursor	VHTECCHGDLLECADDRADLAK	7	99
3	spt|P02768|ALBU_HUMAN	Serum albumin precursor	VPQVSTPTLVEVSR	13	99
3	spt|P02768|ALBU_HUMAN	Serum albumin precursor	YICENQDSISSK	15	99
3	spt|P02768|ALBU_HUMAN	Serum albumin precursor	YLYEIAR	15	99
4	spt|P18206|VINC_HUMAN	Vinculin (Metavinculin)	AAAVGTANK	10	99
4	spt|P18206|VINC_HUMAN	Vinculin (Metavinculin)	AASDELSK	10	99
4	spt|P18206|VINC_HUMAN	Vinculin (Metavinculin)	AGEVINQPMMMAAR	15	99
4	spt|P18206|VINC_HUMAN	Vinculin (Metavinculin)	AIPDLTAPVAAVQAAVSNLVR	12	99
4	spt|P18206|VINC_HUMAN	Vinculin (Metavinculin)	ALASIDSK	7	99
4	spt|P18206|VINC_HUMAN	Vinculin (Metavinculin)	ALASQLQDSLK	11	99
4	spt|P18206|VINC_HUMAN	Vinculin (Metavinculin)	AQQVSQGLDVLTAK	13	99
4	spt|P18206|VINC_HUMAN	Vinculin (Metavinculin)	AVAGNISDPGLQK	12	99
4	spt|P18206|VINC_HUMAN	Vinculin (Metavinculin)	AVANSRPAK	11	99
4	spt|P18206|VINC_HUMAN	Vinculin (Metavinculin)	CDRVDQLTAQLADLAAR	7	99
4	spt|P18206|VINC_HUMAN	Vinculin (Metavinculin)	DPSASPGDAGEQAIR	12	99
4	spt|P18206|VINC_HUMAN	Vinculin (Metavinculin)	DYLIDGSR	6	99
4	spt|P18206|VINC_HUMAN	Vinculin (Metavinculin)	EAEAASIK	4	99
4	spt|P18206|VINC_HUMAN	Vinculin (Metavinculin)	EAFQPQEPDFPPPPPDLEQLR	15	99
4	spt|P18206|VINC_HUMAN	Vinculin (Metavinculin)	ELTPQVVSAAR	16	99
4	spt|P18206|VINC_HUMAN	Vinculin (Metavinculin)	ETVQTTEDQILK	7	99
4	spt|P18206|VINC_HUMAN	Vinculin (Metavinculin)	EVENSEDPKFR	5	99
4	spt|P18206|VINC_HUMAN	Vinculin (Metavinculin)	GEGESPQAR	5	99
4	spt|P18206|VINC_HUMAN	Vinculin (Metavinculin)	GLVAEGHR	4	99
4	spt|P18206|VINC_HUMAN	Vinculin (Metavinculin)	GVGQAAIR	8	99
4	spt|P18206|VINC_HUMAN	Vinculin (Metavinculin)	GWLRDPSASPGDAGEQAIR	11	99
4	spt|P18206|VINC_HUMAN	Vinculin (Metavinculin)	KIDAAQNWLADPNGGPEGEEQIR	3	99
4	spt|P18206|VINC_HUMAN	Vinculin (Metavinculin)	KLEAMTNSK	4	99
4	spt|P18206|VINC_HUMAN	Vinculin (Metavinculin)	LANVMMGPYR	8	99
4	spt|P18206|VINC_HUMAN	Vinculin (Metavinculin)	LLAVAATAPPDAPNREEVFDER	7	99
4	spt|P18206|VINC_HUMAN	Vinculin (Metavinculin)	LTDELAPPKPPLPEGEVPPPRPPPPEEKDEEFPEQK	2	99
4	spt|P18206|VINC_HUMAN	Vinculin (Metavinculin)	LVQAAQMLQSDPYSVPAR	14	99
4	spt|P18206|VINC_HUMAN	Vinculin (Metavinculin)	MALLMAEMSR	7	99
4	spt|P18206|VINC_HUMAN	Vinculin (Metavinculin)	MLGQMTDQVADLR	15	99
4	spt|P18206|VINC_HUMAN	Vinculin (Metavinculin)	MQEAMTQEVSDVFSDTTTPIK	6	99
4	spt|P18206|VINC_HUMAN	Vinculin (Metavinculin)	MSAEINEIIR	5	99
4	spt|P18206|VINC_HUMAN	Vinculin (Metavinculin)	MTGLVDEAIDTK	4	99
4	spt|P18206|VINC_HUMAN	Vinculin (Metavinculin)	NPGNQAAYEHFETMK	3	99
4	spt|P18206|VINC_HUMAN	Vinculin (Metavinculin)	NQGIEEALK	5	99
4	spt|P18206|VINC_HUMAN	Vinculin (Metavinculin)	NQWIDNVEK	4	99
4	spt|P18206|VINC_HUMAN	Vinculin (Metavinculin)	QQELTHQEHR	6	99
4	spt|P18206|VINC_HUMAN	Vinculin (Metavinculin)	QVATALQNLQTK	19	99
4	spt|P18206|VINC_HUMAN	Vinculin (Metavinculin)	SFLDSGYR	8	99
4	spt|P18206|VINC_HUMAN	Vinculin (Metavinculin)	SLGEISALTSK	4	99
4	spt|P18206|VINC_HUMAN	Vinculin (Metavinculin)	SLLDASEEAIKK	2	99
4	spt|P18206|VINC_HUMAN	Vinculin (Metavinculin)	STVEGIQASVK	8	99
4	spt|P18206|VINC_HUMAN	Vinculin (Metavinculin)	TDAGFTLR	16	99
4	spt|P18206|VINC_HUMAN	Vinculin (Metavinculin)	TNLLQVCER	7	99
4	spt|P18206|VINC_HUMAN	Vinculin (Metavinculin)	VAMANIQPQMLVAGATSIAR	19	99
4	spt|P18206|VINC_HUMAN	Vinculin (Metavinculin)	VDQLTAQLADLAAR	13	99
4	spt|P18206|VINC_HUMAN	Vinculin (Metavinculin)	VGELCAGK	1	99
4	spt|P18206|VINC_HUMAN	Vinculin (Metavinculin)	VLQLTSWDEDAWASK	4	99
4	spt|P18206|VINC_HUMAN	Vinculin (Metavinculin)	WIDNPTVDDR	7	99
4	spt|P18206|VINC_HUMAN	Vinculin (Metavinculin)	WIDNPTVDDRGVGQAAIR	6	99
5	trm|Q53G76|Q53G76_HUMAN	Beta actin variant (Fragment)	AGFAGDDAPR	18	99
5	trm|Q53G76|Q53G76_HUMAN	Beta actin variant (Fragment)	ALDFEQEMATAASSSSLEK	1	99
5	trm|Q53G76|Q53G76_HUMAN	Beta actin variant (Fragment)	AVFPSIVGR	18	99
5	trm|Q53G76|Q53G76_HUMAN	Beta actin variant (Fragment)	AVFPSIVGRP	4	99
5	trm|Q53G76|Q53G76_HUMAN	Beta actin variant (Fragment)	AVFPSIVGRPR	17	99
5	trm|Q53G76|Q53G76_HUMAN	Beta actin variant (Fragment)	CPEALFQPSFLGMESCGIHETTFNSIMK	3	99
5	trm|Q53G76|Q53G76_HUMAN	Beta actin variant (Fragment)	DDDIAALVVDNGSGMCK	18	99
5	trm|Q53G76|Q53G76_HUMAN	Beta actin variant (Fragment)	DDDIAALVVDNGSGMCKAGF	4	99
5	trm|Q53G76|Q53G76_HUMAN	Beta actin variant (Fragment)	DDIAALVVDNGSGMCK	12	99
5	trm|Q53G76|Q53G76_HUMAN	Beta actin variant (Fragment)	DLTDYLMK	13	99
5	trm|Q53G76|Q53G76_HUMAN	Beta actin variant (Fragment)	DLYANTVLSGGTTMYPGIADR	18	99
5	trm|Q53G76|Q53G76_HUMAN	Beta actin variant (Fragment)	DSYVGDEAQS	1	99
5	trm|Q53G76|Q53G76_HUMAN	Beta actin variant (Fragment)	DSYVGDEAQSK	15	99
5	trm|Q53G76|Q53G76_HUMAN	Beta actin variant (Fragment)	DSYVGDEAQSKR	12	99
5	trm|Q53G76|Q53G76_HUMAN	Beta actin variant (Fragment)	EITALAPSTMK	18	99
5	trm|Q53G76|Q53G76_HUMAN	Beta actin variant (Fragment)	GFAGDDAPR	1	99
5	trm|Q53G76|Q53G76_HUMAN	Beta actin variant (Fragment)	GYSFTTTAER	14	99
5	trm|Q53G76|Q53G76_HUMAN	Beta actin variant (Fragment)	HQGVMVGMGQK	11	99
5	trm|Q53G76|Q53G76_HUMAN	Beta actin variant (Fragment)	IIAPPERK	13	99
5	trm|Q53G76|Q53G76_HUMAN	Beta actin variant (Fragment)	IKIIAPPER	10	99
5	trm|Q53G76|Q53G76_HUMAN	Beta actin variant (Fragment)	IKIIAPPERK	4	99
5	trm|Q53G76|Q53G76_HUMAN	Beta actin variant (Fragment)	IWHHTFYNELR	6	99
5	trm|Q53G76|Q53G76_HUMAN	Beta actin variant (Fragment)	KDLYANTVLSGGTTMYPGIADR	15	99
5	trm|Q53G76|Q53G76_HUMAN	Beta actin variant (Fragment)	LCYVALDFEQEMATAASSSSLEK	4	99
5	trm|Q53G76|Q53G76_HUMAN	Beta actin variant (Fragment)	LDLAGRDLTDYLMK	9	99
5	trm|Q53G76|Q53G76_HUMAN	Beta actin variant (Fragment)	LLTEAPLNPK	3	99
5	trm|Q53G76|Q53G76_HUMAN	Beta actin variant (Fragment)	MQKEITALAPSTMK	13	99
5	trm|Q53G76|Q53G76_HUMAN	Beta actin variant (Fragment)	PDGQVITIGNER	6	99
5	trm|Q53G76|Q53G76_HUMAN	Beta actin variant (Fragment)	QEYDESGPSIVHR	13	99
5	trm|Q53G76|Q53G76_HUMAN	Beta actin variant (Fragment)	SGGTTMYPGIADR	5	99
5	trm|Q53G76|Q53G76_HUMAN	Beta actin variant (Fragment)	SYELPDGQVITI	10	99
5	trm|Q53G76|Q53G76_HUMAN	Beta actin variant (Fragment)	SYELPDGQVITIGNER	18	99
5	trm|Q53G76|Q53G76_HUMAN	Beta actin variant (Fragment)	TEAPLNPK	8	99
5	trm|Q53G76|Q53G76_HUMAN	Beta actin variant (Fragment)	TTGIVMDSGDGVTHTVPIYEGY	3	99
5	trm|Q53G76|Q53G76_HUMAN	Beta actin variant (Fragment)	TTGIVMDSGDGVTHTVPIYEGYALPH	7	99
5	trm|Q53G76|Q53G76_HUMAN	Beta actin variant (Fragment)	TTGIVMDSGDGVTHTVPIYEGYALPHAILR	11	99
5	trm|Q53G76|Q53G76_HUMAN	Beta actin variant (Fragment)	TVLSGGTTMYPGIADR	6	99
5	trm|Q53G76|Q53G76_HUMAN	Beta actin variant (Fragment)	VAPEEHPVLL	11	99
5	trm|Q53G76|Q53G76_HUMAN	Beta actin variant (Fragment)	VAPEEHPVLLTEA	9	99
5	trm|Q53G76|Q53G76_HUMAN	Beta actin variant (Fragment)	VAPEEHPVLLTEAPLN	12	99
5	trm|Q53G76|Q53G76_HUMAN	Beta actin variant (Fragment)	VAPEEHPVLLTEAPLNPK	17	99
5	trm|Q53G76|Q53G76_HUMAN	Beta actin variant (Fragment)	VLSGGTTMYPGIADR	4	99
5	trm|Q53G76|Q53G76_HUMAN	Beta actin variant (Fragment)	YPIEHGIVTNWDDMEK	10	99
6	trm|Q548L2|Q548L2_HUMAN	CTCL tumor antigen HD-CL-06 (Vimentin variant)	ASSPGGVYATR	3	99
6	trm|Q548L2|Q548L2_HUMAN	CTCL tumor antigen HD-CL-06 (Vimentin variant)	DGQVINETSQHHDDLE	17	99
6	trm|Q548L2|Q548L2_HUMAN	CTCL tumor antigen HD-CL-06 (Vimentin variant)	DNLAEDIMR	11	99
6	trm|Q548L2|Q548L2_HUMAN	CTCL tumor antigen HD-CL-06 (Vimentin variant)	DVRQQYESVAAK	6	99
6	trm|Q548L2|Q548L2_HUMAN	CTCL tumor antigen HD-CL-06 (Vimentin variant)	EEAENTLQSFR	11	99
6	trm|Q548L2|Q548L2_HUMAN	CTCL tumor antigen HD-CL-06 (Vimentin variant)	EMEENFAVEAANYQDTIGR	13	99
6	trm|Q548L2|Q548L2_HUMAN	CTCL tumor antigen HD-CL-06 (Vimentin variant)	ETNLDSLPLVDTHSK	11	99
6	trm|Q548L2|Q548L2_HUMAN	CTCL tumor antigen HD-CL-06 (Vimentin variant)	EYQDLLNVK	12	99
6	trm|Q548L2|Q548L2_HUMAN	CTCL tumor antigen HD-CL-06 (Vimentin variant)	FADLSEAANR	20	99
6	trm|Q548L2|Q548L2_HUMAN	CTCL tumor antigen HD-CL-06 (Vimentin variant)	FADLSEAANRNNDALR	13	99
6	trm|Q548L2|Q548L2_HUMAN	CTCL tumor antigen HD-CL-06 (Vimentin variant)	ILLAELEQLK	8	99
6	trm|Q548L2|Q548L2_HUMAN	CTCL tumor antigen HD-CL-06 (Vimentin variant)	ILLAELEQLKGQGK	8	99
6	trm|Q548L2|Q548L2_HUMAN	CTCL tumor antigen HD-CL-06 (Vimentin variant)	ISLPLPNFSSLNLR	16	99
6	trm|Q548L2|Q548L2_HUMAN	CTCL tumor antigen HD-CL-06 (Vimentin variant)	KLLEGEESR	6	99
6	trm|Q548L2|Q548L2_HUMAN	CTCL tumor antigen HD-CL-06 (Vimentin variant)	KVESLQEEIAFLK	11	99
6	trm|Q548L2|Q548L2_HUMAN	CTCL tumor antigen HD-CL-06 (Vimentin variant)	LGDLYEEEMR	16	99
6	trm|Q548L2|Q548L2_HUMAN	CTCL tumor antigen HD-CL-06 (Vimentin variant)	LLEGEESR	8	99
6	trm|Q548L2|Q548L2_HUMAN	CTCL tumor antigen HD-CL-06 (Vimentin variant)	LLQDSVDFSLADAINTEFK	10	99
6	trm|Q548L2|Q548L2_HUMAN	CTCL tumor antigen HD-CL-06 (Vimentin variant)	LQDEIQNMKEEMAR	9	99
6	trm|Q548L2|Q548L2_HUMAN	CTCL tumor antigen HD-CL-06 (Vimentin variant)	LQEEMLQREEAENTLQSFR	6	99
6	trm|Q548L2|Q548L2_HUMAN	CTCL tumor antigen HD-CL-06 (Vimentin variant)	NLDSLPLVDTHSK	2	99
6	trm|Q548L2|Q548L2_HUMAN	CTCL tumor antigen HD-CL-06 (Vimentin variant)	NLQEAEEWYK	11	99
6	trm|Q548L2|Q548L2_HUMAN	CTCL tumor antigen HD-CL-06 (Vimentin variant)	QDVDNASLAR	20	99
6	trm|Q548L2|Q548L2_HUMAN	CTCL tumor antigen HD-CL-06 (Vimentin variant)	QQYESVAAK	20	99
6	trm|Q548L2|Q548L2_HUMAN	CTCL tumor antigen HD-CL-06 (Vimentin variant)	QVDQLTNDKAR	7	99
6	trm|Q548L2|Q548L2_HUMAN	CTCL tumor antigen HD-CL-06 (Vimentin variant)	QVQSLTCEVDALK	15	99
6	trm|Q548L2|Q548L2_HUMAN	CTCL tumor antigen HD-CL-06 (Vimentin variant)	QVQSLTCEVDALKGTNESLER	6	99
6	trm|Q548L2|Q548L2_HUMAN	CTCL tumor antigen HD-CL-06 (Vimentin variant)	SLPLVDTHSK	1	99
6	trm|Q548L2|Q548L2_HUMAN	CTCL tumor antigen HD-CL-06 (Vimentin variant)	SLYASSPGGVYATR	14	99
6	trm|Q548L2|Q548L2_HUMAN	CTCL tumor antigen HD-CL-06 (Vimentin variant)	SVSSSSYR	4	99
6	trm|Q548L2|Q548L2_HUMAN	CTCL tumor antigen HD-CL-06 (Vimentin variant)	SYVTTSTR	4	99
6	trm|Q548L2|Q548L2_HUMAN	CTCL tumor antigen HD-CL-06 (Vimentin variant)	TNEKVELQELNDR	9	99
6	trm|Q548L2|Q548L2_HUMAN	CTCL tumor antigen HD-CL-06 (Vimentin variant)	TYSLGSALRPSTSR	15	99
6	trm|Q548L2|Q548L2_HUMAN	CTCL tumor antigen HD-CL-06 (Vimentin variant)	VELQELNDR	10	99
6	trm|Q548L2|Q548L2_HUMAN	CTCL tumor antigen HD-CL-06 (Vimentin variant)	VEVERDNLAEDIMR	11	99
7	trm|Q59EJ3|Q59EJ3_HUMAN	Heat shock 70kDa protein 1A variant (Fragment)	AFYPEEISSMVLTK	6	99
7	trm|Q59EJ3|Q59EJ3_HUMAN	Heat shock 70kDa protein 1A variant (Fragment)	AQIHDLVLVGGSTR	11	99
7	trm|Q59EJ3|Q59EJ3_HUMAN	Heat shock 70kDa protein 1A variant (Fragment)	ATAGDTHLGGEDFDNR	16	99
7	trm|Q59EJ3|Q59EJ3_HUMAN	Heat shock 70kDa protein 1A variant (Fragment)	DAGVIAGLNVLR	19	99
7	trm|Q59EJ3|Q59EJ3_HUMAN	Heat shock 70kDa protein 1A variant (Fragment)	ELEQVCNPIISGLYQGAGGPGPGGFGAQGPK	14	99
7	trm|Q59EJ3|Q59EJ3_HUMAN	Heat shock 70kDa protein 1A variant (Fragment)	FEELCSDLFR	9	99
7	trm|Q59EJ3|Q59EJ3_HUMAN	Heat shock 70kDa protein 1A variant (Fragment)	FELSGIPPAPR	6	99
7	trm|Q59EJ3|Q59EJ3_HUMAN	Heat shock 70kDa protein 1A variant (Fragment)	FGDPVVQSDMK	4	99
7	trm|Q59EJ3|Q59EJ3_HUMAN	Heat shock 70kDa protein 1A variant (Fragment)	GGSGSGPTIEEVD	18	99
7	trm|Q59EJ3|Q59EJ3_HUMAN	Heat shock 70kDa protein 1A variant (Fragment)	IINEPTAAAIAYGLDR	18	99
7	trm|Q59EJ3|Q59EJ3_HUMAN	Heat shock 70kDa protein 1A variant (Fragment)	ITITNDKGR	4	99
7	trm|Q59EJ3|Q59EJ3_HUMAN	Heat shock 70kDa protein 1A variant (Fragment)	LLQDFFNGR	8	99
7	trm|Q59EJ3|Q59EJ3_HUMAN	Heat shock 70kDa protein 1A variant (Fragment)	LLQDFFNGRDLNK	7	99
7	trm|Q59EJ3|Q59EJ3_HUMAN	Heat shock 70kDa protein 1A variant (Fragment)	LSKEEIER	4	99
7	trm|Q59EJ3|Q59EJ3_HUMAN	Heat shock 70kDa protein 1A variant (Fragment)	LVNHFVEEFK	5	99
7	trm|Q59EJ3|Q59EJ3_HUMAN	Heat shock 70kDa protein 1A variant (Fragment)	NALESYAFNMK	12	99
7	trm|Q59EJ3|Q59EJ3_HUMAN	Heat shock 70kDa protein 1A variant (Fragment)	NAVITVPAYFNDSQR	6	99
7	trm|Q59EJ3|Q59EJ3_HUMAN	Heat shock 70kDa protein 1A variant (Fragment)	NQVALNPQNTVFDAK	18	99
7	trm|Q59EJ3|Q59EJ3_HUMAN	Heat shock 70kDa protein 1A variant (Fragment)	NQVALNPQNTVFDAKR	13	99
7	trm|Q59EJ3|Q59EJ3_HUMAN	Heat shock 70kDa protein 1A variant (Fragment)	PFQVINDGDKPK	1	99
7	trm|Q59EJ3|Q59EJ3_HUMAN	Heat shock 70kDa protein 1A variant (Fragment)	QATKDAGVIAGLNVLR	9	99
7	trm|Q59EJ3|Q59EJ3_HUMAN	Heat shock 70kDa protein 1A variant (Fragment)	RIINEPTAAAIAYGLDR	1	99
7	trm|Q59EJ3|Q59EJ3_HUMAN	Heat shock 70kDa protein 1A variant (Fragment)	SAVEDEGLK	5	99
7	trm|Q59EJ3|Q59EJ3_HUMAN	Heat shock 70kDa protein 1A variant (Fragment)	SCVGVFQHGK	3	99
7	trm|Q59EJ3|Q59EJ3_HUMAN	Heat shock 70kDa protein 1A variant (Fragment)	SINPDEAVAYGAAVQAAILMGDK	5	99
7	trm|Q59EJ3|Q59EJ3_HUMAN	Heat shock 70kDa protein 1A variant (Fragment)	STLEPVEK	5	99
7	trm|Q59EJ3|Q59EJ3_HUMAN	Heat shock 70kDa protein 1A variant (Fragment)	TTPSYVAFTDTER	18	99
7	trm|Q59EJ3|Q59EJ3_HUMAN	Heat shock 70kDa protein 1A variant (Fragment)	VEIIANDQGNR	15	99
7	trm|Q59EJ3|Q59EJ3_HUMAN	Heat shock 70kDa protein 1A variant (Fragment)	VQVSYKGETK	6	99
7	trm|Q59EJ3|Q59EJ3_HUMAN	Heat shock 70kDa protein 1A variant (Fragment)	YKAEDEVQR	4	99
8	trm|Q53H26|Q53H26_HUMAN	Transferrin variant (Fragment)	ADRDQYELLCLDNTR	10	99
8	trm|Q53H26|Q53H26_HUMAN	Transferrin variant (Fragment)	APNHAVVTR	15	99
8	trm|Q53H26|Q53H26_HUMAN	Transferrin variant (Fragment)	APNHAVVTRK	6	99
8	trm|Q53H26|Q53H26_HUMAN	Transferrin variant (Fragment)	ASYLDCIR	10	99
8	trm|Q53H26|Q53H26_HUMAN	Transferrin variant (Fragment)	CDEWSVNSVGK	3	99
8	trm|Q53H26|Q53H26_HUMAN	Transferrin variant (Fragment)	CLKDGAGDVAFVK	9	99
8	trm|Q53H26|Q53H26_HUMAN	Transferrin variant (Fragment)	CSTSSLLEACTFR	11	99
8	trm|Q53H26|Q53H26_HUMAN	Transferrin variant (Fragment)	DCHLAQVPSHTVVAR	5	99
8	trm|Q53H26|Q53H26_HUMAN	Transferrin variant (Fragment)	DDTVCLAK	7	99
8	trm|Q53H26|Q53H26_HUMAN	Transferrin variant (Fragment)	DGAGDVAFVK	11	99
8	trm|Q53H26|Q53H26_HUMAN	Transferrin variant (Fragment)	DLLFRDDTVCLAK	6	99
8	trm|Q53H26|Q53H26_HUMAN	Transferrin variant (Fragment)	DQYELLCLDNTR	7	99
8	trm|Q53H26|Q53H26_HUMAN	Transferrin variant (Fragment)	DSGFQMNQLR	13	99
8	trm|Q53H26|Q53H26_HUMAN	Transferrin variant (Fragment)	DYELLCLDGTR	4	99
8	trm|Q53H26|Q53H26_HUMAN	Transferrin variant (Fragment)	EDPQTFYYAVAVVK	8	99
8	trm|Q53H26|Q53H26_HUMAN	Transferrin variant (Fragment)	EFQLFSSPHGK	7	99
8	trm|Q53H26|Q53H26_HUMAN	Transferrin variant (Fragment)	EGTCPEAPTDECKPVK	9	99
8	trm|Q53H26|Q53H26_HUMAN	Transferrin variant (Fragment)	EGYYGYTGAFR	12	99
8	trm|Q53H26|Q53H26_HUMAN	Transferrin variant (Fragment)	FDEFFSEGCAPGSK	11	99
8	trm|Q53H26|Q53H26_HUMAN	Transferrin variant (Fragment)	IECVSAETTEDCIAK	11	99
8	trm|Q53H26|Q53H26_HUMAN	Transferrin variant (Fragment)	IMNGEADAMSLDGGFVYIAGK	9	99
8	trm|Q53H26|Q53H26_HUMAN	Transferrin variant (Fragment)	KASYLDCIR	11	99
8	trm|Q53H26|Q53H26_HUMAN	Transferrin variant (Fragment)	KDSGFQMNQLR	15	99
8	trm|Q53H26|Q53H26_HUMAN	Transferrin variant (Fragment)	KPVDEYKDCHLAQVPSHTVVAR	3	99
8	trm|Q53H26|Q53H26_HUMAN	Transferrin variant (Fragment)	KPVEEYANCHLAR	8	99
8	trm|Q53H26|Q53H26_HUMAN	Transferrin variant (Fragment)	LCMGSGLNLCEPNNK	7	99
8	trm|Q53H26|Q53H26_HUMAN	Transferrin variant (Fragment)	LCMGSGLNLCEPNNKEGYYGYTGAFR	5	99
8	trm|Q53H26|Q53H26_HUMAN	Transferrin variant (Fragment)	LKCDEWSVNSVGK	7	99
8	trm|Q53H26|Q53H26_HUMAN	Transferrin variant (Fragment)	MYLGYEYVTAIR	11	99
8	trm|Q53H26|Q53H26_HUMAN	Transferrin variant (Fragment)	NLNEKDYELLCLDGTR	11	99
8	trm|Q53H26|Q53H26_HUMAN	Transferrin variant (Fragment)	SAGWNIPIGLLYCDLPEPR	10	99
8	trm|Q53H26|Q53H26_HUMAN	Transferrin variant (Fragment)	SASDLTWDNLK	13	99
8	trm|Q53H26|Q53H26_HUMAN	Transferrin variant (Fragment)	SDNCEDTPEAGYFAVAVVK	5	99
8	trm|Q53H26|Q53H26_HUMAN	Transferrin variant (Fragment)	SETKDLLFR	3	99
8	trm|Q53H26|Q53H26_HUMAN	Transferrin variant (Fragment)	SKEFQLFSSPHGK	4	99
8	trm|Q53H26|Q53H26_HUMAN	Transferrin variant (Fragment)	SVIPSDGPSVACVK	19	99
8	trm|Q53H26|Q53H26_HUMAN	Transferrin variant (Fragment)	TAGWNIPMGLLYNK	12	99
8	trm|Q53H26|Q53H26_HUMAN	Transferrin variant (Fragment)	WCAVSEHEATK	10	99
8	trm|Q53H26|Q53H26_HUMAN	Transferrin variant (Fragment)	YLGEEYVK	20	99
8	trm|Q53H26|Q53H26_HUMAN	Transferrin variant (Fragment)	YYGYTGAFR	5	99
9	spt|P01024|CO3_HUMAN	Complement C3 precursor [Contains: Complement C3 beta chain; Complement C3 alpha chain; C3a anaphylatoxin; Complement C3b alpha' chain; Complement C3c fragment; Complement C3dg fragment; Complement C3g fragment; Complement C3d fragment; Complement C3f fragment]	ACEPGVDYVYK	6	99
9	spt|P01024|CO3_HUMAN	Complement C3 precursor [Contains: Complement C3 beta chain; Complement C3 alpha chain; C3a anaphylatoxin; Complement C3b alpha' chain; Complement C3c fragment; Complement C3dg fragment; Complement C3g fragment; Complement C3d fragment; Complement C3f fragment]	AGDFLEANYMNLQR	11	99
9	spt|P01024|CO3_HUMAN	Complement C3 precursor [Contains: Complement C3 beta chain; Complement C3 alpha chain; C3a anaphylatoxin; Complement C3b alpha' chain; Complement C3c fragment; Complement C3dg fragment; Complement C3g fragment; Complement C3d fragment; Complement C3f fragment]	AKDQLTCNKFDLK	4	99
9	spt|P01024|CO3_HUMAN	Complement C3 precursor [Contains: Complement C3 beta chain; Complement C3 alpha chain; C3a anaphylatoxin; Complement C3b alpha' chain; Complement C3c fragment; Complement C3dg fragment; Complement C3g fragment; Complement C3d fragment; Complement C3f fragment]	DSCVGSLVVK	1	99
9	spt|P01024|CO3_HUMAN	Complement C3 precursor [Contains: Complement C3 beta chain; Complement C3 alpha chain; C3a anaphylatoxin; Complement C3b alpha' chain; Complement C3c fragment; Complement C3dg fragment; Complement C3g fragment; Complement C3d fragment; Complement C3f fragment]	DTWVEHWPEEDECQDEENQK	2	99
9	spt|P01024|CO3_HUMAN	Complement C3 precursor [Contains: Complement C3 beta chain; Complement C3 alpha chain; C3a anaphylatoxin; Complement C3b alpha' chain; Complement C3c fragment; Complement C3dg fragment; Complement C3g fragment; Complement C3d fragment; Complement C3f fragment]	EALKLEEK	3	99
9	spt|P01024|CO3_HUMAN	Complement C3 precursor [Contains: Complement C3 beta chain; Complement C3 alpha chain; C3a anaphylatoxin; Complement C3b alpha' chain; Complement C3c fragment; Complement C3dg fragment; Complement C3g fragment; Complement C3d fragment; Complement C3f fragment]	EDIPPADLSDQVPDTESETR	6	99
9	spt|P01024|CO3_HUMAN	Complement C3 precursor [Contains: Complement C3 beta chain; Complement C3 alpha chain; C3a anaphylatoxin; Complement C3b alpha' chain; Complement C3c fragment; Complement C3dg fragment; Complement C3g fragment; Complement C3d fragment; Complement C3f fragment]	EGVQKEDIPPADLSDQVPDTESETR	7	99
9	spt|P01024|CO3_HUMAN	Complement C3 precursor [Contains: Complement C3 beta chain; Complement C3 alpha chain; C3a anaphylatoxin; Complement C3b alpha' chain; Complement C3c fragment; Complement C3dg fragment; Complement C3g fragment; Complement C3d fragment; Complement C3f fragment]	EPGQDLVVLPLSITTDFIPSFR	5	99
9	spt|P01024|CO3_HUMAN	Complement C3 precursor [Contains: Complement C3 beta chain; Complement C3 alpha chain; C3a anaphylatoxin; Complement C3b alpha' chain; Complement C3c fragment; Complement C3dg fragment; Complement C3g fragment; Complement C3d fragment; Complement C3f fragment]	EYVLPSFEVIVEPTEK	2	99
9	spt|P01024|CO3_HUMAN	Complement C3 precursor [Contains: Complement C3 beta chain; Complement C3 alpha chain; C3a anaphylatoxin; Complement C3b alpha' chain; Complement C3c fragment; Complement C3dg fragment; Complement C3g fragment; Complement C3d fragment; Complement C3f fragment]	GLEVTITAR	1	99
9	spt|P01024|CO3_HUMAN	Complement C3 precursor [Contains: Complement C3 beta chain; Complement C3 alpha chain; C3a anaphylatoxin; Complement C3b alpha' chain; Complement C3c fragment; Complement C3dg fragment; Complement C3g fragment; Complement C3d fragment; Complement C3f fragment]	GYTQQLAFR	4	99
9	spt|P01024|CO3_HUMAN	Complement C3 precursor [Contains: Complement C3 beta chain; Complement C3 alpha chain; C3a anaphylatoxin; Complement C3b alpha' chain; Complement C3c fragment; Complement C3dg fragment; Complement C3g fragment; Complement C3d fragment; Complement C3f fragment]	ILLQGTPVAQMTEDAVDAER	17	99
9	spt|P01024|CO3_HUMAN	Complement C3 precursor [Contains: Complement C3 beta chain; Complement C3 alpha chain; C3a anaphylatoxin; Complement C3b alpha' chain; Complement C3c fragment; Complement C3dg fragment; Complement C3g fragment; Complement C3d fragment; Complement C3f fragment]	IPIEDGSGEVVLSR	7	99
9	spt|P01024|CO3_HUMAN	Complement C3 precursor [Contains: Complement C3 beta chain; Complement C3 alpha chain; C3a anaphylatoxin; Complement C3b alpha' chain; Complement C3c fragment; Complement C3dg fragment; Complement C3g fragment; Complement C3d fragment; Complement C3f fragment]	KGYTQQLAFR	1	99
9	spt|P01024|CO3_HUMAN	Complement C3 precursor [Contains: Complement C3 beta chain; Complement C3 alpha chain; C3a anaphylatoxin; Complement C3b alpha' chain; Complement C3c fragment; Complement C3dg fragment; Complement C3g fragment; Complement C3d fragment; Complement C3f fragment]	KLVLSSEK	5	99
9	spt|P01024|CO3_HUMAN	Complement C3 precursor [Contains: Complement C3 beta chain; Complement C3 alpha chain; C3a anaphylatoxin; Complement C3b alpha' chain; Complement C3c fragment; Complement C3dg fragment; Complement C3g fragment; Complement C3d fragment; Complement C3f fragment]	KQELSEAEQATR	12	99
9	spt|P01024|CO3_HUMAN	Complement C3 precursor [Contains: Complement C3 beta chain; Complement C3 alpha chain; C3a anaphylatoxin; Complement C3b alpha' chain; Complement C3c fragment; Complement C3dg fragment; Complement C3g fragment; Complement C3d fragment; Complement C3f fragment]	LKGPLLNK	3	99
9	spt|P01024|CO3_HUMAN	Complement C3 precursor [Contains: Complement C3 beta chain; Complement C3 alpha chain; C3a anaphylatoxin; Complement C3b alpha' chain; Complement C3c fragment; Complement C3dg fragment; Complement C3g fragment; Complement C3d fragment; Complement C3f fragment]	LVAYYTLIGASGQR	10	99
9	spt|P01024|CO3_HUMAN	Complement C3 precursor [Contains: Complement C3 beta chain; Complement C3 alpha chain; C3a anaphylatoxin; Complement C3b alpha' chain; Complement C3c fragment; Complement C3dg fragment; Complement C3g fragment; Complement C3d fragment; Complement C3f fragment]	NTMILEICTR	3	99
9	spt|P01024|CO3_HUMAN	Complement C3 precursor [Contains: Complement C3 beta chain; Complement C3 alpha chain; C3a anaphylatoxin; Complement C3b alpha' chain; Complement C3c fragment; Complement C3dg fragment; Complement C3g fragment; Complement C3d fragment; Complement C3f fragment]	QELSEAEQATR	7	99
9	spt|P01024|CO3_HUMAN	Complement C3 precursor [Contains: Complement C3 beta chain; Complement C3 alpha chain; C3a anaphylatoxin; Complement C3b alpha' chain; Complement C3c fragment; Complement C3dg fragment; Complement C3g fragment; Complement C3d fragment; Complement C3f fragment]	QPSSAFAAFVK	12	99
9	spt|P01024|CO3_HUMAN	Complement C3 precursor [Contains: Complement C3 beta chain; Complement C3 alpha chain; C3a anaphylatoxin; Complement C3b alpha' chain; Complement C3c fragment; Complement C3dg fragment; Complement C3g fragment; Complement C3d fragment; Complement C3f fragment]	QPVPGQQMTLK	11	99
9	spt|P01024|CO3_HUMAN	Complement C3 precursor [Contains: Complement C3 beta chain; Complement C3 alpha chain; C3a anaphylatoxin; Complement C3b alpha' chain; Complement C3c fragment; Complement C3dg fragment; Complement C3g fragment; Complement C3d fragment; Complement C3f fragment]	RIPIEDGSGEVVLSR	9	99
9	spt|P01024|CO3_HUMAN	Complement C3 precursor [Contains: Complement C3 beta chain; Complement C3 alpha chain; C3a anaphylatoxin; Complement C3b alpha' chain; Complement C3c fragment; Complement C3dg fragment; Complement C3g fragment; Complement C3d fragment; Complement C3f fragment]	SDDKVTLEER	5	99
9	spt|P01024|CO3_HUMAN	Complement C3 precursor [Contains: Complement C3 beta chain; Complement C3 alpha chain; C3a anaphylatoxin; Complement C3b alpha' chain; Complement C3c fragment; Complement C3dg fragment; Complement C3g fragment; Complement C3d fragment; Complement C3f fragment]	SGIPIVTSPYQIHFTK	11	99
9	spt|P01024|CO3_HUMAN	Complement C3 precursor [Contains: Complement C3 beta chain; Complement C3 alpha chain; C3a anaphylatoxin; Complement C3b alpha' chain; Complement C3c fragment; Complement C3dg fragment; Complement C3g fragment; Complement C3d fragment; Complement C3f fragment]	SGQSEDRQPVPGQQMTLK	10	99
9	spt|P01024|CO3_HUMAN	Complement C3 precursor [Contains: Complement C3 beta chain; Complement C3 alpha chain; C3a anaphylatoxin; Complement C3b alpha' chain; Complement C3c fragment; Complement C3dg fragment; Complement C3g fragment; Complement C3d fragment; Complement C3f fragment]	SGSDEVQVGQQR	13	99
9	spt|P01024|CO3_HUMAN	Complement C3 precursor [Contains: Complement C3 beta chain; Complement C3 alpha chain; C3a anaphylatoxin; Complement C3b alpha' chain; Complement C3c fragment; Complement C3dg fragment; Complement C3g fragment; Complement C3d fragment; Complement C3f fragment]	SLYVSATVILHSGSDMVQAER	1	99
9	spt|P01024|CO3_HUMAN	Complement C3 precursor [Contains: Complement C3 beta chain; Complement C3 alpha chain; C3a anaphylatoxin; Complement C3b alpha' chain; Complement C3c fragment; Complement C3dg fragment; Complement C3g fragment; Complement C3d fragment; Complement C3f fragment]	SNLDEDIIAEENIVSR	14	99
9	spt|P01024|CO3_HUMAN	Complement C3 precursor [Contains: Complement C3 beta chain; Complement C3 alpha chain; C3a anaphylatoxin; Complement C3b alpha' chain; Complement C3c fragment; Complement C3dg fragment; Complement C3g fragment; Complement C3d fragment; Complement C3f fragment]	SPMYSIITPNILR	3	99
9	spt|P01024|CO3_HUMAN	Complement C3 precursor [Contains: Complement C3 beta chain; Complement C3 alpha chain; C3a anaphylatoxin; Complement C3b alpha' chain; Complement C3c fragment; Complement C3dg fragment; Complement C3g fragment; Complement C3d fragment; Complement C3f fragment]	SSLSVPYVIVPLK	9	99
9	spt|P01024|CO3_HUMAN	Complement C3 precursor [Contains: Complement C3 beta chain; Complement C3 alpha chain; C3a anaphylatoxin; Complement C3b alpha' chain; Complement C3c fragment; Complement C3dg fragment; Complement C3g fragment; Complement C3d fragment; Complement C3f fragment]	TELRPGETLNVNFLLR	6	99
9	spt|P01024|CO3_HUMAN	Complement C3 precursor [Contains: Complement C3 beta chain; Complement C3 alpha chain; C3a anaphylatoxin; Complement C3b alpha' chain; Complement C3c fragment; Complement C3dg fragment; Complement C3g fragment; Complement C3d fragment; Complement C3f fragment]	TGLQEVEVK	5	99
9	spt|P01024|CO3_HUMAN	Complement C3 precursor [Contains: Complement C3 beta chain; Complement C3 alpha chain; C3a anaphylatoxin; Complement C3b alpha' chain; Complement C3c fragment; Complement C3dg fragment; Complement C3g fragment; Complement C3d fragment; Complement C3f fragment]	TKKQELSEAEQATR	5	99
9	spt|P01024|CO3_HUMAN	Complement C3 precursor [Contains: Complement C3 beta chain; Complement C3 alpha chain; C3a anaphylatoxin; Complement C3b alpha' chain; Complement C3c fragment; Complement C3dg fragment; Complement C3g fragment; Complement C3d fragment; Complement C3f fragment]	TVMVNIENPEGIPVK	9	99
9	spt|P01024|CO3_HUMAN	Complement C3 precursor [Contains: Complement C3 beta chain; Complement C3 alpha chain; C3a anaphylatoxin; Complement C3b alpha' chain; Complement C3c fragment; Complement C3dg fragment; Complement C3g fragment; Complement C3d fragment; Complement C3f fragment]	VELLHNPAFCSLATTK	5	99
9	spt|P01024|CO3_HUMAN	Complement C3 precursor [Contains: Complement C3 beta chain; Complement C3 alpha chain; C3a anaphylatoxin; Complement C3b alpha' chain; Complement C3c fragment; Complement C3dg fragment; Complement C3g fragment; Complement C3d fragment; Complement C3f fragment]	VPVAVQGEDTVQSLTQGDGVAK	12	99
9	spt|P01024|CO3_HUMAN	Complement C3 precursor [Contains: Complement C3 beta chain; Complement C3 alpha chain; C3a anaphylatoxin; Complement C3b alpha' chain; Complement C3c fragment; Complement C3dg fragment; Complement C3g fragment; Complement C3d fragment; Complement C3f fragment]	VQLSNDFDEYIMAIEQTIK	6	99
9	spt|P01024|CO3_HUMAN	Complement C3 precursor [Contains: Complement C3 beta chain; Complement C3 alpha chain; C3a anaphylatoxin; Complement C3b alpha' chain; Complement C3c fragment; Complement C3dg fragment; Complement C3g fragment; Complement C3d fragment; Complement C3f fragment]	VTIKPAPETEK	1	99
9	spt|P01024|CO3_HUMAN	Complement C3 precursor [Contains: Complement C3 beta chain; Complement C3 alpha chain; C3a anaphylatoxin; Complement C3b alpha' chain; Complement C3c fragment; Complement C3dg fragment; Complement C3g fragment; Complement C3d fragment; Complement C3f fragment]	VVLVAVDK	1	99
10	trm|Q0V924|Q0V924_HUMAN	Valosin-containing protein	ASGADSKGDDLSTAILK	8	99
10	trm|Q0V924|Q0V924_HUMAN	Valosin-containing protein	DVDLEFLAK	7	99
10	trm|Q0V924|Q0V924_HUMAN	Valosin-containing protein	ELQELVQYPVEHPDKFLK	3	99
10	trm|Q0V924|Q0V924_HUMAN	Valosin-containing protein	EMVELPLRHPALFK	4	99
10	trm|Q0V924|Q0V924_HUMAN	Valosin-containing protein	ESIESEIR	5	99
10	trm|Q0V924|Q0V924_HUMAN	Valosin-containing protein	ETVVEVPQVTWEDIGGLEDVK	6	99
10	trm|Q0V924|Q0V924_HUMAN	Valosin-containing protein	ETVVEVPQVTWEDIGGLEDVKR	5	99
10	trm|Q0V924|Q0V924_HUMAN	Valosin-containing protein	EVDIGIPDATGR	9	99
10	trm|Q0V924|Q0V924_HUMAN	Valosin-containing protein	GGNIGDGGGAADR	17	99
10	trm|Q0V924|Q0V924_HUMAN	Valosin-containing protein	GILLYGPPGTGK	9	99
10	trm|Q0V924|Q0V924_HUMAN	Valosin-containing protein	GVLFYGPPGCGK	8	99
10	trm|Q0V924|Q0V924_HUMAN	Valosin-containing protein	KYEMFAQTLQQSR	6	99
10	trm|Q0V924|Q0V924_HUMAN	Valosin-containing protein	LAGESESNLR	12	99
10	trm|Q0V924|Q0V924_HUMAN	Valosin-containing protein	LDQLIYIPLPDEK	6	99
10	trm|Q0V924|Q0V924_HUMAN	Valosin-containing protein	LEILQIHTK	4	99
10	trm|Q0V924|Q0V924_HUMAN	Valosin-containing protein	LGDVISIQPCPDVK	7	99
10	trm|Q0V924|Q0V924_HUMAN	Valosin-containing protein	LIVDEAINEDNSVVSLSQPK	13	99
10	trm|Q0V924|Q0V924_HUMAN	Valosin-containing protein	MDELQLFR	9	99
10	trm|Q0V924|Q0V924_HUMAN	Valosin-containing protein	MTNGFSGADLTEICQR	7	99
10	trm|Q0V924|Q0V924_HUMAN	Valosin-containing protein	NAPAIIFIDELDAIAPK	8	99
10	trm|Q0V924|Q0V924_HUMAN	Valosin-containing protein	QAAPCVLFFDELDSIAK	8	99
10	trm|Q0V924|Q0V924_HUMAN	Valosin-containing protein	QTNPSAMEVEEDDPVPEIR	7	99
10	trm|Q0V924|Q0V924_HUMAN	Valosin-containing protein	SVSDNDIR	9	99
10	trm|Q0V924|Q0V924_HUMAN	Valosin-containing protein	VINQILTEMDGMSTK	9	99
10	trm|Q0V924|Q0V924_HUMAN	Valosin-containing protein	WALSQSNPSALR	5	99
11	trm|Q6P4C7|Q6P4C7_HUMAN	KRT8 protein (Fragment)	AQYEDIANR	12	99
11	trm|Q6P4C7|Q6P4C7_HUMAN	KRT8 protein (Fragment)	ASLEAAIADAEQR	12	99
11	trm|Q6P4C7|Q6P4C7_HUMAN	KRT8 protein (Fragment)	DVDEAYMNKVELESR	4	99
11	trm|Q6P4C7|Q6P4C7_HUMAN	KRT8 protein (Fragment)	ELQSQISDTSVVLSMDNSR	9	99
11	trm|Q6P4C7|Q6P4C7_HUMAN	KRT8 protein (Fragment)	GELAIKDANAK	4	99
11	trm|Q6P4C7|Q6P4C7_HUMAN	KRT8 protein (Fragment)	GGLGGGYGGASGMGG	1	99
11	trm|Q6P4C7|Q6P4C7_HUMAN	KRT8 protein (Fragment)	GSGAGSSSFSR	4	99
11	trm|Q6P4C7|Q6P4C7_HUMAN	KRT8 protein (Fragment)	ISSSSFSR	4	99
11	trm|Q6P4C7|Q6P4C7_HUMAN	KRT8 protein (Fragment)	KLLEGEESR	6	99
11	trm|Q6P4C7|Q6P4C7_HUMAN	KRT8 protein (Fragment)	LEGLTDEINFLR	12	99
11	trm|Q6P4C7|Q6P4C7_HUMAN	KRT8 protein (Fragment)	LLEGEESR	8	99
11	trm|Q6P4C7|Q6P4C7_HUMAN	KRT8 protein (Fragment)	LQAEIEGLK	15	99
11	trm|Q6P4C7|Q6P4C7_HUMAN	KRT8 protein (Fragment)	LQAEIEGLKGQR	9	99
11	trm|Q6P4C7|Q6P4C7_HUMAN	KRT8 protein (Fragment)	LSELEAALQR	17	99
11	trm|Q6P4C7|Q6P4C7_HUMAN	KRT8 protein (Fragment)	LVLEVDPNIQAVR	1	99
11	trm|Q6P4C7|Q6P4C7_HUMAN	KRT8 protein (Fragment)	LVSESSDVLP	14	99
11	trm|Q6P4C7|Q6P4C7_HUMAN	KRT8 protein (Fragment)	LVSESSDVLPK	6	99
11	trm|Q6P4C7|Q6P4C7_HUMAN	KRT8 protein (Fragment)	QLYEEEIR	4	99
11	trm|Q6P4C7|Q6P4C7_HUMAN	KRT8 protein (Fragment)	SLDMDSIIAEVK	15	99
11	trm|Q6P4C7|Q6P4C7_HUMAN	KRT8 protein (Fragment)	SNMDNMFESYINNLR	9	99
11	trm|Q6P4C7|Q6P4C7_HUMAN	KRT8 protein (Fragment)	TEISEMNR	3	99
11	trm|Q6P4C7|Q6P4C7_HUMAN	KRT8 protein (Fragment)	TKTEISEMNR	5	99
11	trm|Q6P4C7|Q6P4C7_HUMAN	KRT8 protein (Fragment)	TVNQSLLSPLVLEVDPNIQAVR	1	99
11	trm|Q6P4C7|Q6P4C7_HUMAN	KRT8 protein (Fragment)	VLEVDPNIQAVR	4	99
11	trm|Q6P4C7|Q6P4C7_HUMAN	KRT8 protein (Fragment)	YEELQSLAGK	4	99
12	spt|P11021|GRP78_HUMAN	78 kDa glucose-regulated protein precursor (GRP 78) (Heat shock 70 kDa protein 5) (Immunoglobulin heavy chain-binding protein) (BiP) (Endoplasmic reticulum lumenal Ca(2+)-binding protein grp78)	AKFEELNMDLFR	7	99
12	spt|P11021|GRP78_HUMAN	78 kDa glucose-regulated protein precursor (GRP 78) (Heat shock 70 kDa protein 5) (Immunoglobulin heavy chain-binding protein) (BiP) (Endoplasmic reticulum lumenal Ca(2+)-binding protein grp78)	DAGTIAGLNVMR	14	99
12	spt|P11021|GRP78_HUMAN	78 kDa glucose-regulated protein precursor (GRP 78) (Heat shock 70 kDa protein 5) (Immunoglobulin heavy chain-binding protein) (BiP) (Endoplasmic reticulum lumenal Ca(2+)-binding protein grp78)	DNHLLGTFDLTGIPPAPR	9	99
12	spt|P11021|GRP78_HUMAN	78 kDa glucose-regulated protein precursor (GRP 78) (Heat shock 70 kDa protein 5) (Immunoglobulin heavy chain-binding protein) (BiP) (Endoplasmic reticulum lumenal Ca(2+)-binding protein grp78)	EFFNGKEPSR	3	99
12	spt|P11021|GRP78_HUMAN	78 kDa glucose-regulated protein precursor (GRP 78) (Heat shock 70 kDa protein 5) (Immunoglobulin heavy chain-binding protein) (BiP) (Endoplasmic reticulum lumenal Ca(2+)-binding protein grp78)	ELEEIVQPIISK	10	99
12	spt|P11021|GRP78_HUMAN	78 kDa glucose-regulated protein precursor (GRP 78) (Heat shock 70 kDa protein 5) (Immunoglobulin heavy chain-binding protein) (BiP) (Endoplasmic reticulum lumenal Ca(2+)-binding protein grp78)	IEIESFYEGEDFSETLTR	4	99
12	spt|P11021|GRP78_HUMAN	78 kDa glucose-regulated protein precursor (GRP 78) (Heat shock 70 kDa protein 5) (Immunoglobulin heavy chain-binding protein) (BiP) (Endoplasmic reticulum lumenal Ca(2+)-binding protein grp78)	IINEPTAAAIAYGLDK	12	99
12	spt|P11021|GRP78_HUMAN	78 kDa glucose-regulated protein precursor (GRP 78) (Heat shock 70 kDa protein 5) (Immunoglobulin heavy chain-binding protein) (BiP) (Endoplasmic reticulum lumenal Ca(2+)-binding protein grp78)	IINEPTAAAIAYGLDKR	7	99
12	spt|P11021|GRP78_HUMAN	78 kDa glucose-regulated protein precursor (GRP 78) (Heat shock 70 kDa protein 5) (Immunoglobulin heavy chain-binding protein) (BiP) (Endoplasmic reticulum lumenal Ca(2+)-binding protein grp78)	ITITNDQNR	8	99
12	spt|P11021|GRP78_HUMAN	78 kDa glucose-regulated protein precursor (GRP 78) (Heat shock 70 kDa protein 5) (Immunoglobulin heavy chain-binding protein) (BiP) (Endoplasmic reticulum lumenal Ca(2+)-binding protein grp78)	ITPSYVAFTPEGER	12	99
12	spt|P11021|GRP78_HUMAN	78 kDa glucose-regulated protein precursor (GRP 78) (Heat shock 70 kDa protein 5) (Immunoglobulin heavy chain-binding protein) (BiP) (Endoplasmic reticulum lumenal Ca(2+)-binding protein grp78)	KSDIDEIVLVGGSTR	4	99
12	spt|P11021|GRP78_HUMAN	78 kDa glucose-regulated protein precursor (GRP 78) (Heat shock 70 kDa protein 5) (Immunoglobulin heavy chain-binding protein) (BiP) (Endoplasmic reticulum lumenal Ca(2+)-binding protein grp78)	KSQIFSTASDNQPTVTIK	4	99
12	spt|P11021|GRP78_HUMAN	78 kDa glucose-regulated protein precursor (GRP 78) (Heat shock 70 kDa protein 5) (Immunoglobulin heavy chain-binding protein) (BiP) (Endoplasmic reticulum lumenal Ca(2+)-binding protein grp78)	LTPEEIER	11	99
12	spt|P11021|GRP78_HUMAN	78 kDa glucose-regulated protein precursor (GRP 78) (Heat shock 70 kDa protein 5) (Immunoglobulin heavy chain-binding protein) (BiP) (Endoplasmic reticulum lumenal Ca(2+)-binding protein grp78)	LYGSAGPPPTGEEDTAEKDEL	14	99
12	spt|P11021|GRP78_HUMAN	78 kDa glucose-regulated protein precursor (GRP 78) (Heat shock 70 kDa protein 5) (Immunoglobulin heavy chain-binding protein) (BiP) (Endoplasmic reticulum lumenal Ca(2+)-binding protein grp78)	NQLTSNPENTVFDAK	14	99
12	spt|P11021|GRP78_HUMAN	78 kDa glucose-regulated protein precursor (GRP 78) (Heat shock 70 kDa protein 5) (Immunoglobulin heavy chain-binding protein) (BiP) (Endoplasmic reticulum lumenal Ca(2+)-binding protein grp78)	NQLTSNPENTVFDAKR	7	99
12	spt|P11021|GRP78_HUMAN	78 kDa glucose-regulated protein precursor (GRP 78) (Heat shock 70 kDa protein 5) (Immunoglobulin heavy chain-binding protein) (BiP) (Endoplasmic reticulum lumenal Ca(2+)-binding protein grp78)	NTVVPTKK	3	99
12	spt|P11021|GRP78_HUMAN	78 kDa glucose-regulated protein precursor (GRP 78) (Heat shock 70 kDa protein 5) (Immunoglobulin heavy chain-binding protein) (BiP) (Endoplasmic reticulum lumenal Ca(2+)-binding protein grp78)	QATKDAGTIAGLNVMR	4	99
12	spt|P11021|GRP78_HUMAN	78 kDa glucose-regulated protein precursor (GRP 78) (Heat shock 70 kDa protein 5) (Immunoglobulin heavy chain-binding protein) (BiP) (Endoplasmic reticulum lumenal Ca(2+)-binding protein grp78)	SDIDEIVLVGGSTR	4	99
12	spt|P11021|GRP78_HUMAN	78 kDa glucose-regulated protein precursor (GRP 78) (Heat shock 70 kDa protein 5) (Immunoglobulin heavy chain-binding protein) (BiP) (Endoplasmic reticulum lumenal Ca(2+)-binding protein grp78)	SQIFSTASDNQPTVTIK	12	99
12	spt|P11021|GRP78_HUMAN	78 kDa glucose-regulated protein precursor (GRP 78) (Heat shock 70 kDa protein 5) (Immunoglobulin heavy chain-binding protein) (BiP) (Endoplasmic reticulum lumenal Ca(2+)-binding protein grp78)	TFAPEEISAMVLTK	11	99
12	spt|P11021|GRP78_HUMAN	78 kDa glucose-regulated protein precursor (GRP 78) (Heat shock 70 kDa protein 5) (Immunoglobulin heavy chain-binding protein) (BiP) (Endoplasmic reticulum lumenal Ca(2+)-binding protein grp78)	TWNDPSVQQDIK	5	99
12	spt|P11021|GRP78_HUMAN	78 kDa glucose-regulated protein precursor (GRP 78) (Heat shock 70 kDa protein 5) (Immunoglobulin heavy chain-binding protein) (BiP) (Endoplasmic reticulum lumenal Ca(2+)-binding protein grp78)	VEIIANDQGNR	11	99
12	spt|P11021|GRP78_HUMAN	78 kDa glucose-regulated protein precursor (GRP 78) (Heat shock 70 kDa protein 5) (Immunoglobulin heavy chain-binding protein) (BiP) (Endoplasmic reticulum lumenal Ca(2+)-binding protein grp78)	VYEGERPLTK	6	99
13	trm|Q58J86|Q58J86_HUMAN	Elongation factor 2	AGIIASAR	9	99
13	trm|Q58J86|Q58J86_HUMAN	Elongation factor 2	ALLELQLEPEELYQTFQR	2	99
13	trm|Q58J86|Q58J86_HUMAN	Elongation factor 2	ARPFPDGLAEDIDKGEVSAR	10	99
13	trm|Q58J86|Q58J86_HUMAN	Elongation factor 2	AYLPVNESFGFTADLR	11	99
13	trm|Q58J86|Q58J86_HUMAN	Elongation factor 2	CELLYEGPPDDEAAMGIK	6	99
13	trm|Q58J86|Q58J86_HUMAN	Elongation factor 2	CLYASVLTAQPR	10	99
13	trm|Q58J86|Q58J86_HUMAN	Elongation factor 2	EGIPALDNFLDKL	8	99
13	trm|Q58J86|Q58J86_HUMAN	Elongation factor 2	ETVSEESNVLCLSK	11	99
13	trm|Q58J86|Q58J86_HUMAN	Elongation factor 2	FSVSPVVR	11	99
13	trm|Q58J86|Q58J86_HUMAN	Elongation factor 2	GEGQLGPAER	10	99
13	trm|Q58J86|Q58J86_HUMAN	Elongation factor 2	GGGQIIPTAR	17	99
13	trm|Q58J86|Q58J86_HUMAN	Elongation factor 2	GHVFEESQVAGTPMFVVK	5	99
13	trm|Q58J86|Q58J86_HUMAN	Elongation factor 2	GPLMMYISK	13	99
13	trm|Q58J86|Q58J86_HUMAN	Elongation factor 2	KEDLYLKPIQR	2	99
13	trm|Q58J86|Q58J86_HUMAN	Elongation factor 2	PFPDGLAEDIDKGEVSAR	3	99
13	trm|Q58J86|Q58J86_HUMAN	Elongation factor 2	SDPVVSYR	4	99
13	trm|Q58J86|Q58J86_HUMAN	Elongation factor 2	STLTDSLVCK	5	99
13	trm|Q58J86|Q58J86_HUMAN	Elongation factor 2	VFSGLVSTGLK	7	99
13	trm|Q58J86|Q58J86_HUMAN	Elongation factor 2	VNFTVDQIR	19	99
13	trm|Q58J86|Q58J86_HUMAN	Elongation factor 2	YEWDVAEAR	5	99
14	spt|P08238|HS90B_HUMAN	Heat shock protein HSP 90-beta (HSP 84) (HSP 90)	ADHGEPIGR	6	99
14	spt|P08238|HS90B_HUMAN	Heat shock protein HSP 90-beta (HSP 84) (HSP 90)	ADLINNLGTIAK	13	99
14	spt|P08238|HS90B_HUMAN	Heat shock protein HSP 90-beta (HSP 84) (HSP 90)	APFDLFENK	2	99
14	spt|P08238|HS90B_HUMAN	Heat shock protein HSP 90-beta (HSP 84) (HSP 90)	DNSTMGYMMAK	4	99
14	spt|P08238|HS90B_HUMAN	Heat shock protein HSP 90-beta (HSP 84) (HSP 90)	EDQTEYLEER	7	99
14	spt|P08238|HS90B_HUMAN	Heat shock protein HSP 90-beta (HSP 84) (HSP 90)	EGLELPEDEEEK	3	99
14	spt|P08238|HS90B_HUMAN	Heat shock protein HSP 90-beta (HSP 84) (HSP 90)	EGLELPEDEEEKK	3	99
14	spt|P08238|HS90B_HUMAN	Heat shock protein HSP 90-beta (HSP 84) (HSP 90)	EGLELPEDEEEKKK	6	99
14	spt|P08238|HS90B_HUMAN	Heat shock protein HSP 90-beta (HSP 84) (HSP 90)	EKYIDQEELNK	5	99
14	spt|P08238|HS90B_HUMAN	Heat shock protein HSP 90-beta (HSP 84) (HSP 90)	ELISNASDALDK	4	99
14	spt|P08238|HS90B_HUMAN	Heat shock protein HSP 90-beta (HSP 84) (HSP 90)	ELISNASDALDKIR	7	99
14	spt|P08238|HS90B_HUMAN	Heat shock protein HSP 90-beta (HSP 84) (HSP 90)	EQVANSAFVER	9	99
14	spt|P08238|HS90B_HUMAN	Heat shock protein HSP 90-beta (HSP 84) (HSP 90)	GFEVVYMTEPIDEYCVQQLK	2	99
14	spt|P08238|HS90B_HUMAN	Heat shock protein HSP 90-beta (HSP 84) (HSP 90)	GVVDSEDLPLNISR	11	99
14	spt|P08238|HS90B_HUMAN	Heat shock protein HSP 90-beta (HSP 84) (HSP 90)	HLEINPDHPIVETLR	5	99
14	spt|P08238|HS90B_HUMAN	Heat shock protein HSP 90-beta (HSP 84) (HSP 90)	HSQFIGYPITLYLEK	3	99
14	spt|P08238|HS90B_HUMAN	Heat shock protein HSP 90-beta (HSP 84) (HSP 90)	IDIIPNPQER	10	99
14	spt|P08238|HS90B_HUMAN	Heat shock protein HSP 90-beta (HSP 84) (HSP 90)	IEDVGSDEEDDSGKDKK	8	99
14	spt|P08238|HS90B_HUMAN	Heat shock protein HSP 90-beta (HSP 84) (HSP 90)	LGIHEDSTNR	6	99
14	spt|P08238|HS90B_HUMAN	Heat shock protein HSP 90-beta (HSP 84) (HSP 90)	LGLGIDEDEVAAEEPNAAVPDEIPPLEGDEDASR	11	99
14	spt|P08238|HS90B_HUMAN	Heat shock protein HSP 90-beta (HSP 84) (HSP 90)	NPDDITQEEYGEFYK	10	99
14	spt|P08238|HS90B_HUMAN	Heat shock protein HSP 90-beta (HSP 84) (HSP 90)	RAPFDLFENK	8	99
14	spt|P08238|HS90B_HUMAN	Heat shock protein HSP 90-beta (HSP 84) (HSP 90)	SIYYITGESK	5	99
14	spt|P08238|HS90B_HUMAN	Heat shock protein HSP 90-beta (HSP 84) (HSP 90)	SLTNDWEDHLAVK	11	99
14	spt|P08238|HS90B_HUMAN	Heat shock protein HSP 90-beta (HSP 84) (HSP 90)	TLTLVDTGIGMTK	11	99
14	spt|P08238|HS90B_HUMAN	Heat shock protein HSP 90-beta (HSP 84) (HSP 90)	YESLTDPSK	2	99
14	spt|P08238|HS90B_HUMAN	Heat shock protein HSP 90-beta (HSP 84) (HSP 90)	YESLTDPSKLDSGK	2	99
14	spt|P08238|HS90B_HUMAN	Heat shock protein HSP 90-beta (HSP 84) (HSP 90)	YIDQEELNK	8	99
15	trm|Q53X65|Q53X65_HUMAN	GAPD protein (Fragment)	AENGKLVINGNPITIFQERDPSK	11	99
15	trm|Q53X65|Q53X65_HUMAN	GAPD protein (Fragment)	AGAHLQGGAK	8	99
15	trm|Q53X65|Q53X65_HUMAN	GAPD protein (Fragment)	ANVSVVDLTCR	2	99
15	trm|Q53X65|Q53X65_HUMAN	GAPD protein (Fragment)	DGRGALQNIIPASTGAAK	12	99
15	trm|Q53X65|Q53X65_HUMAN	GAPD protein (Fragment)	GALQNIIPASTGAAK	20	99
15	trm|Q53X65|Q53X65_HUMAN	GAPD protein (Fragment)	IISNASCTTNCLAPLAK	16	99
15	trm|Q53X65|Q53X65_HUMAN	GAPD protein (Fragment)	LISWYDNEFGYSNR	8	99
15	trm|Q53X65|Q53X65_HUMAN	GAPD protein (Fragment)	LVINGNPITIFQER	10	99
15	trm|Q53X65|Q53X65_HUMAN	GAPD protein (Fragment)	LVINGNPITIFQERDPSK	11	99
15	trm|Q53X65|Q53X65_HUMAN	GAPD protein (Fragment)	TVDGPSGK	11	99
15	trm|Q53X65|Q53X65_HUMAN	GAPD protein (Fragment)	VGVNGFGR	17	99
15	trm|Q53X65|Q53X65_HUMAN	GAPD protein (Fragment)	VIISAPSADAPMFVMGVNHEK	11	99
15	trm|Q53X65|Q53X65_HUMAN	GAPD protein (Fragment)	VIPELNGK	18	99
15	trm|Q53X65|Q53X65_HUMAN	GAPD protein (Fragment)	VPTANVSVVDL	2	99
15	trm|Q53X65|Q53X65_HUMAN	GAPD protein (Fragment)	VPTANVSVVDLTCR	16	99
15	trm|Q53X65|Q53X65_HUMAN	GAPD protein (Fragment)	VSVVDLTCR	2	99
15	trm|Q53X65|Q53X65_HUMAN	GAPD protein (Fragment)	VVDLMAHMASK	9	99
15	trm|Q53X65|Q53X65_HUMAN	GAPD protein (Fragment)	VVDLMAHMASKE	13	99
15	trm|Q53X65|Q53X65_HUMAN	GAPD protein (Fragment)	WGDAGAEYVVESTGVFTTMEK	7	99
16	spt|P14618|KPYM_HUMAN	Pyruvate kinase isozymes M1/M2 (EC 2.7.1.40) (Pyruvate kinase muscle isozyme) (Pyruvate kinase 2/3) (Cytosolic thyroid hormone-binding protein) (CTHBP) (THBP1)	AEGSDVANAVLDGADCIMLSGETAK	15	99
16	spt|P14618|KPYM_HUMAN	Pyruvate kinase isozymes M1/M2 (EC 2.7.1.40) (Pyruvate kinase muscle isozyme) (Pyruvate kinase 2/3) (Cytosolic thyroid hormone-binding protein) (CTHBP) (THBP1)	APIIAVTR	12	99
16	spt|P14618|KPYM_HUMAN	Pyruvate kinase isozymes M1/M2 (EC 2.7.1.40) (Pyruvate kinase muscle isozyme) (Pyruvate kinase 2/3) (Cytosolic thyroid hormone-binding protein) (CTHBP) (THBP1)	CCSGAIIVLTK	2	99
16	spt|P14618|KPYM_HUMAN	Pyruvate kinase isozymes M1/M2 (EC 2.7.1.40) (Pyruvate kinase muscle isozyme) (Pyruvate kinase 2/3) (Cytosolic thyroid hormone-binding protein) (CTHBP) (THBP1)	EAEAAIYHLQLFEELR	9	99
16	spt|P14618|KPYM_HUMAN	Pyruvate kinase isozymes M1/M2 (EC 2.7.1.40) (Pyruvate kinase muscle isozyme) (Pyruvate kinase 2/3) (Cytosolic thyroid hormone-binding protein) (CTHBP) (THBP1)	FGVEQDVDMVFASFIR	7	99
16	spt|P14618|KPYM_HUMAN	Pyruvate kinase isozymes M1/M2 (EC 2.7.1.40) (Pyruvate kinase muscle isozyme) (Pyruvate kinase 2/3) (Cytosolic thyroid hormone-binding protein) (CTHBP) (THBP1)	GADFLVTEVENGGSLGSK	21	99
16	spt|P14618|KPYM_HUMAN	Pyruvate kinase isozymes M1/M2 (EC 2.7.1.40) (Pyruvate kinase muscle isozyme) (Pyruvate kinase 2/3) (Cytosolic thyroid hormone-binding protein) (CTHBP) (THBP1)	GDLGIEIPAEK	18	99
16	spt|P14618|KPYM_HUMAN	Pyruvate kinase isozymes M1/M2 (EC 2.7.1.40) (Pyruvate kinase muscle isozyme) (Pyruvate kinase 2/3) (Cytosolic thyroid hormone-binding protein) (CTHBP) (THBP1)	GDLGIEIPAEKVFLAQK	6	99
16	spt|P14618|KPYM_HUMAN	Pyruvate kinase isozymes M1/M2 (EC 2.7.1.40) (Pyruvate kinase muscle isozyme) (Pyruvate kinase 2/3) (Cytosolic thyroid hormone-binding protein) (CTHBP) (THBP1)	GDYPLEAVR	14	99
16	spt|P14618|KPYM_HUMAN	Pyruvate kinase isozymes M1/M2 (EC 2.7.1.40) (Pyruvate kinase muscle isozyme) (Pyruvate kinase 2/3) (Cytosolic thyroid hormone-binding protein) (CTHBP) (THBP1)	GSGTAEVELK	4	99
16	spt|P14618|KPYM_HUMAN	Pyruvate kinase isozymes M1/M2 (EC 2.7.1.40) (Pyruvate kinase muscle isozyme) (Pyruvate kinase 2/3) (Cytosolic thyroid hormone-binding protein) (CTHBP) (THBP1)	GSGTAEVELKK	1	99
16	spt|P14618|KPYM_HUMAN	Pyruvate kinase isozymes M1/M2 (EC 2.7.1.40) (Pyruvate kinase muscle isozyme) (Pyruvate kinase 2/3) (Cytosolic thyroid hormone-binding protein) (CTHBP) (THBP1)	GVNLPGAAVDLPAVSEK	9	99
16	spt|P14618|KPYM_HUMAN	Pyruvate kinase isozymes M1/M2 (EC 2.7.1.40) (Pyruvate kinase muscle isozyme) (Pyruvate kinase 2/3) (Cytosolic thyroid hormone-binding protein) (CTHBP) (THBP1)	GVNLPGAAVDLPAVSEKDIQDLK	12	99
16	spt|P14618|KPYM_HUMAN	Pyruvate kinase isozymes M1/M2 (EC 2.7.1.40) (Pyruvate kinase muscle isozyme) (Pyruvate kinase 2/3) (Cytosolic thyroid hormone-binding protein) (CTHBP) (THBP1)	ITLDNAYMEK	12	99
16	spt|P14618|KPYM_HUMAN	Pyruvate kinase isozymes M1/M2 (EC 2.7.1.40) (Pyruvate kinase muscle isozyme) (Pyruvate kinase 2/3) (Cytosolic thyroid hormone-binding protein) (CTHBP) (THBP1)	KASDVHEVR	7	99
16	spt|P14618|KPYM_HUMAN	Pyruvate kinase isozymes M1/M2 (EC 2.7.1.40) (Pyruvate kinase muscle isozyme) (Pyruvate kinase 2/3) (Cytosolic thyroid hormone-binding protein) (CTHBP) (THBP1)	KGVNLPGAAVDLPAVSEK	11	99
16	spt|P14618|KPYM_HUMAN	Pyruvate kinase isozymes M1/M2 (EC 2.7.1.40) (Pyruvate kinase muscle isozyme) (Pyruvate kinase 2/3) (Cytosolic thyroid hormone-binding protein) (CTHBP) (THBP1)	LAPITSDPTEATAVGAVEASFK	9	99
16	spt|P14618|KPYM_HUMAN	Pyruvate kinase isozymes M1/M2 (EC 2.7.1.40) (Pyruvate kinase muscle isozyme) (Pyruvate kinase 2/3) (Cytosolic thyroid hormone-binding protein) (CTHBP) (THBP1)	LDIDSPPITAR	21	99
16	spt|P14618|KPYM_HUMAN	Pyruvate kinase isozymes M1/M2 (EC 2.7.1.40) (Pyruvate kinase muscle isozyme) (Pyruvate kinase 2/3) (Cytosolic thyroid hormone-binding protein) (CTHBP) (THBP1)	NTGIICTIGPASR	17	99
16	spt|P14618|KPYM_HUMAN	Pyruvate kinase isozymes M1/M2 (EC 2.7.1.40) (Pyruvate kinase muscle isozyme) (Pyruvate kinase 2/3) (Cytosolic thyroid hormone-binding protein) (CTHBP) (THBP1)	QKGADFLVTEVENGGSLGSK	8	99
16	spt|P14618|KPYM_HUMAN	Pyruvate kinase isozymes M1/M2 (EC 2.7.1.40) (Pyruvate kinase muscle isozyme) (Pyruvate kinase 2/3) (Cytosolic thyroid hormone-binding protein) (CTHBP) (THBP1)	RFDEILEASDGIMVAR	10	99
16	spt|P14618|KPYM_HUMAN	Pyruvate kinase isozymes M1/M2 (EC 2.7.1.40) (Pyruvate kinase muscle isozyme) (Pyruvate kinase 2/3) (Cytosolic thyroid hormone-binding protein) (CTHBP) (THBP1)	SVETLKEMIK	6	99
16	spt|P14618|KPYM_HUMAN	Pyruvate kinase isozymes M1/M2 (EC 2.7.1.40) (Pyruvate kinase muscle isozyme) (Pyruvate kinase 2/3) (Cytosolic thyroid hormone-binding protein) (CTHBP) (THBP1)	TATESFASDPILYRPVAV	4	99
16	spt|P14618|KPYM_HUMAN	Pyruvate kinase isozymes M1/M2 (EC 2.7.1.40) (Pyruvate kinase muscle isozyme) (Pyruvate kinase 2/3) (Cytosolic thyroid hormone-binding protein) (CTHBP) (THBP1)	TATESFASDPILYRPVAVALDTK	11	99
16	spt|P14618|KPYM_HUMAN	Pyruvate kinase isozymes M1/M2 (EC 2.7.1.40) (Pyruvate kinase muscle isozyme) (Pyruvate kinase 2/3) (Cytosolic thyroid hormone-binding protein) (CTHBP) (THBP1)	TATESFASDPILYRPVAVALDTKGPEIR	3	99
16	spt|P14618|KPYM_HUMAN	Pyruvate kinase isozymes M1/M2 (EC 2.7.1.40) (Pyruvate kinase muscle isozyme) (Pyruvate kinase 2/3) (Cytosolic thyroid hormone-binding protein) (CTHBP) (THBP1)	VNFAMNVGK	11	99
17	trm|Q53FT9|Q53FT9_HUMAN	Enolase 1 variant (Fragment)	AAVPSGASTGIYEALELR	15	99
17	trm|Q53FT9|Q53FT9_HUMAN	Enolase 1 variant (Fragment)	AAVPSGASTGIYEALELRDNDKTR	8	99
17	trm|Q53FT9|Q53FT9_HUMAN	Enolase 1 variant (Fragment)	DATNVGDEGGFAPN	4	99
17	trm|Q53FT9|Q53FT9_HUMAN	Enolase 1 variant (Fragment)	DATNVGDEGGFAPNILENK	10	99
17	trm|Q53FT9|Q53FT9_HUMAN	Enolase 1 variant (Fragment)	DATNVGDEGGFAPNILENKEGLELLK	5	99
17	trm|Q53FT9|Q53FT9_HUMAN	Enolase 1 variant (Fragment)	DYPVVSIEDPFDQDDWGAWQK	6	99
17	trm|Q53FT9|Q53FT9_HUMAN	Enolase 1 variant (Fragment)	FTASAGIQVVGDDLTVTNPK	16	99
17	trm|Q53FT9|Q53FT9_HUMAN	Enolase 1 variant (Fragment)	FTASAGIQVVGDDLTVTNPKR	4	99
17	trm|Q53FT9|Q53FT9_HUMAN	Enolase 1 variant (Fragment)	GNPTVEVDLFTSK	14	99
17	trm|Q53FT9|Q53FT9_HUMAN	Enolase 1 variant (Fragment)	HIADLAGNSEVILPVPAFNVINGGSHAGNK	9	99
17	trm|Q53FT9|Q53FT9_HUMAN	Enolase 1 variant (Fragment)	IDKLMIEMDGTENK	6	99
17	trm|Q53FT9|Q53FT9_HUMAN	Enolase 1 variant (Fragment)	IEEELGSK	13	99
17	trm|Q53FT9|Q53FT9_HUMAN	Enolase 1 variant (Fragment)	IEEELGSKAK	3	99
17	trm|Q53FT9|Q53FT9_HUMAN	Enolase 1 variant (Fragment)	IGAEVYHNLK	7	99
17	trm|Q53FT9|Q53FT9_HUMAN	Enolase 1 variant (Fragment)	KLNVTEQEK	13	99
17	trm|Q53FT9|Q53FT9_HUMAN	Enolase 1 variant (Fragment)	LAMQEFMILPVGAANFR	5	99
17	trm|Q53FT9|Q53FT9_HUMAN	Enolase 1 variant (Fragment)	LAQANGWGVMVSHR	13	99
17	trm|Q53FT9|Q53FT9_HUMAN	Enolase 1 variant (Fragment)	LMIEMDGTENK	7	99
17	trm|Q53FT9|Q53FT9_HUMAN	Enolase 1 variant (Fragment)	NFRNPLAK	7	99
17	trm|Q53FT9|Q53FT9_HUMAN	Enolase 1 variant (Fragment)	SCNCLLLK	5	99
17	trm|Q53FT9|Q53FT9_HUMAN	Enolase 1 variant (Fragment)	SGKYDLDFK	10	99
17	trm|Q53FT9|Q53FT9_HUMAN	Enolase 1 variant (Fragment)	SPDDPSR	2	99
17	trm|Q53FT9|Q53FT9_HUMAN	Enolase 1 variant (Fragment)	TIAPALVSK	16	99
17	trm|Q53FT9|Q53FT9_HUMAN	Enolase 1 variant (Fragment)	TIAPALVSKK	2	99
17	trm|Q53FT9|Q53FT9_HUMAN	Enolase 1 variant (Fragment)	VNQIGSVTESLQACK	15	99
17	trm|Q53FT9|Q53FT9_HUMAN	Enolase 1 variant (Fragment)	VVIGMDVAASEFFR	7	99
17	trm|Q53FT9|Q53FT9_HUMAN	Enolase 1 variant (Fragment)	YISPDQLADLYK	17	99
18	spt|P13667|PDIA4_HUMAN	Protein disulfide-isomerase A4 precursor (EC 5.3.4.1) (Protein ERp-72) (ERp72)	DLGLSESGEDVNAAILDESGK	5	99
18	spt|P13667|PDIA4_HUMAN	Protein disulfide-isomerase A4 precursor (EC 5.3.4.1) (Protein ERp-72) (ERp72)	DLGLSESGEDVNAAILDESGKK	8	99
18	spt|P13667|PDIA4_HUMAN	Protein disulfide-isomerase A4 precursor (EC 5.3.4.1) (Protein ERp-72) (ERp72)	EVSQPDWTPPPEVTLVLTK	5	99
18	spt|P13667|PDIA4_HUMAN	Protein disulfide-isomerase A4 precursor (EC 5.3.4.1) (Protein ERp-72) (ERp72)	FAMEPEEFDSDTLR	7	99
18	spt|P13667|PDIA4_HUMAN	Protein disulfide-isomerase A4 precursor (EC 5.3.4.1) (Protein ERp-72) (ERp72)	FDVSGYPTIK	10	99
18	spt|P13667|PDIA4_HUMAN	Protein disulfide-isomerase A4 precursor (EC 5.3.4.1) (Protein ERp-72) (ERp72)	FDVSGYPTLK	11	99
18	spt|P13667|PDIA4_HUMAN	Protein disulfide-isomerase A4 precursor (EC 5.3.4.1) (Protein ERp-72) (ERp72)	FIEEHATK	4	99
18	spt|P13667|PDIA4_HUMAN	Protein disulfide-isomerase A4 precursor (EC 5.3.4.1) (Protein ERp-72) (ERp72)	GQAVDYEGSR	4	99
18	spt|P13667|PDIA4_HUMAN	Protein disulfide-isomerase A4 precursor (EC 5.3.4.1) (Protein ERp-72) (ERp72)	IDATSASVLASR	14	99
18	spt|P13667|PDIA4_HUMAN	Protein disulfide-isomerase A4 precursor (EC 5.3.4.1) (Protein ERp-72) (ERp72)	KLAPEYEK	3	99
18	spt|P13667|PDIA4_HUMAN	Protein disulfide-isomerase A4 precursor (EC 5.3.4.1) (Protein ERp-72) (ERp72)	MDATANDVPSDR	8	99
18	spt|P13667|PDIA4_HUMAN	Protein disulfide-isomerase A4 precursor (EC 5.3.4.1) (Protein ERp-72) (ERp72)	QLEPVYNSLAK	15	99
18	spt|P13667|PDIA4_HUMAN	Protein disulfide-isomerase A4 precursor (EC 5.3.4.1) (Protein ERp-72) (ERp72)	TQEEIVAK	8	99
18	spt|P13667|PDIA4_HUMAN	Protein disulfide-isomerase A4 precursor (EC 5.3.4.1) (Protein ERp-72) (ERp72)	VDATAETDLAK	11	99
18	spt|P13667|PDIA4_HUMAN	Protein disulfide-isomerase A4 precursor (EC 5.3.4.1) (Protein ERp-72) (ERp72)	VDATAETDLAKR	6	99
18	spt|P13667|PDIA4_HUMAN	Protein disulfide-isomerase A4 precursor (EC 5.3.4.1) (Protein ERp-72) (ERp72)	VEGFPTIYFAPSGDK	5	99
18	spt|P13667|PDIA4_HUMAN	Protein disulfide-isomerase A4 precursor (EC 5.3.4.1) (Protein ERp-72) (ERp72)	YGIVDYMIEQSGPPSK	8	99
19	trm|Q8N6N5|Q8N6N5_HUMAN	"Tubulin, beta 2C "	ALTVPELTQQMFDAK	12	99
19	trm|Q8N6N5|Q8N6N5_HUMAN	"Tubulin, beta 2C "	AVLVDLEPGTMDSVR	12	99
19	trm|Q8N6N5|Q8N6N5_HUMAN	"Tubulin, beta 2C "	EIVHLQAGQCGNQIGAK	7	99
19	trm|Q8N6N5|Q8N6N5_HUMAN	"Tubulin, beta 2C "	EVDEQMLNVQNK	9	99
19	trm|Q8N6N5|Q8N6N5_HUMAN	"Tubulin, beta 2C "	FPGQLNADLR	8	99
19	trm|Q8N6N5|Q8N6N5_HUMAN	"Tubulin, beta 2C "	GHYTEGAELVDSVLDVVR	3	99
19	trm|Q8N6N5|Q8N6N5_HUMAN	"Tubulin, beta 2C "	IMNTFSVVPSPK	8	99
19	trm|Q8N6N5|Q8N6N5_HUMAN	"Tubulin, beta 2C "	INVYYNEATGGK	8	99
19	trm|Q8N6N5|Q8N6N5_HUMAN	"Tubulin, beta 2C "	KLAVNMVPFPR	6	99
19	trm|Q8N6N5|Q8N6N5_HUMAN	"Tubulin, beta 2C "	LAVNMVPFPR	11	99
19	trm|Q8N6N5|Q8N6N5_HUMAN	"Tubulin, beta 2C "	LHFFMPGFAPLTSR	6	99
19	trm|Q8N6N5|Q8N6N5_HUMAN	"Tubulin, beta 2C "	LTTPTYGDLNHLVSATMSGVTTCLR	1	99
19	trm|Q8N6N5|Q8N6N5_HUMAN	"Tubulin, beta 2C "	MSMKEVDEQMLNVQNK	2	99
19	trm|Q8N6N5|Q8N6N5_HUMAN	"Tubulin, beta 2C "	NSSYFVEWIPNNVK	10	99
19	trm|Q8N6N5|Q8N6N5_HUMAN	"Tubulin, beta 2C "	SGPFGQIFRPDNFVFGQSGAGNNWAK	7	99
19	trm|Q8N6N5|Q8N6N5_HUMAN	"Tubulin, beta 2C "	TAVCDIPPR	9	99
19	trm|Q8N6N5|Q8N6N5_HUMAN	"Tubulin, beta 2C "	VDSVLDVVR	4	99
19	trm|Q8N6N5|Q8N6N5_HUMAN	"Tubulin, beta 2C "	YLTVAAVFR	8	99
20	trm|Q5U0N8|Q5U0N8_HUMAN	Keratin 18 (Cell proliferation-inducing protein 46)	AQIFANTVDNAR	7	99
20	trm|Q5U0N8|Q5U0N8_HUMAN	Keratin 18 (Cell proliferation-inducing protein 46)	AQYDELAR	6	99
20	trm|Q5U0N8|Q5U0N8_HUMAN	Keratin 18 (Cell proliferation-inducing protein 46)	ASLENSLR	8	99
20	trm|Q5U0N8|Q5U0N8_HUMAN	Keratin 18 (Cell proliferation-inducing protein 46)	ETMQSLNDR	8	99
20	trm|Q5U0N8|Q5U0N8_HUMAN	Keratin 18 (Cell proliferation-inducing protein 46)	IVLQIDNAR	9	99
20	trm|Q5U0N8|Q5U0N8_HUMAN	Keratin 18 (Cell proliferation-inducing protein 46)	LEAEIATYR	2	99
20	trm|Q5U0N8|Q5U0N8_HUMAN	Keratin 18 (Cell proliferation-inducing protein 46)	LLEDGEDFNLGDALDSSNSMQTIQK	3	99
20	trm|Q5U0N8|Q5U0N8_HUMAN	Keratin 18 (Cell proliferation-inducing protein 46)	QAQEYEALLNIK	11	99
20	trm|Q5U0N8|Q5U0N8_HUMAN	Keratin 18 (Cell proliferation-inducing protein 46)	QSVENDIHGLR	9	99
20	trm|Q5U0N8|Q5U0N8_HUMAN	Keratin 18 (Cell proliferation-inducing protein 46)	QSVENDIHGLRK	6	99
20	trm|Q5U0N8|Q5U0N8_HUMAN	Keratin 18 (Cell proliferation-inducing protein 46)	SLGSVQAPSYGAR	8	99
20	trm|Q5U0N8|Q5U0N8_HUMAN	Keratin 18 (Cell proliferation-inducing protein 46)	TVQSLEIDLDSMR	6	99
20	trm|Q5U0N8|Q5U0N8_HUMAN	Keratin 18 (Cell proliferation-inducing protein 46)	VIDDTNITR	8	99
20	trm|Q5U0N8|Q5U0N8_HUMAN	Keratin 18 (Cell proliferation-inducing protein 46)	VKYETELAMR	2	99
21	trm|Q5I6Y6|Q5I6Y6_HUMAN	Lamin A/C transcript variant 1	AAYEAELGDAR	5	99
21	trm|Q5I6Y6|Q5I6Y6_HUMAN	Lamin A/C transcript variant 1	EGDLIAAQAR	3	99
21	trm|Q5I6Y6|Q5I6Y6_HUMAN	Lamin A/C transcript variant 1	IDSLSAQLSQLQK	4	99
21	trm|Q5I6Y6|Q5I6Y6_HUMAN	Lamin A/C transcript variant 1	ITESEEVVSR	5	99
21	trm|Q5I6Y6|Q5I6Y6_HUMAN	Lamin A/C transcript variant 1	LADALQELR	6	99
21	trm|Q5I6Y6|Q5I6Y6_HUMAN	Lamin A/C transcript variant 1	LQEKEDLQELNDR	2	99
21	trm|Q5I6Y6|Q5I6Y6_HUMAN	Lamin A/C transcript variant 1	LSPSPTSQR	2	99
21	trm|Q5I6Y6|Q5I6Y6_HUMAN	Lamin A/C transcript variant 1	NIYSEELR	2	99
21	trm|Q5I6Y6|Q5I6Y6_HUMAN	Lamin A/C transcript variant 1	SLETENAGLR	2	99
21	trm|Q5I6Y6|Q5I6Y6_HUMAN	Lamin A/C transcript variant 1	SVGGSGGGSFGDNLVTR	5	99
21	trm|Q5I6Y6|Q5I6Y6_HUMAN	Lamin A/C transcript variant 1	TALINSTGEEVAMR	4	99
21	trm|Q5I6Y6|Q5I6Y6_HUMAN	Lamin A/C transcript variant 1	VAVEEVDEEGKFVR	1	99
22	trm|Q5DSM0|Q5DSM0_HUMAN	Growth-inhibiting protein 12	CLAENAGDVAFVK	1	99
22	trm|Q5DSM0|Q5DSM0_HUMAN	Growth-inhibiting protein 12	DGAGDVAFIR	1	99
22	trm|Q5DSM0|Q5DSM0_HUMAN	Growth-inhibiting protein 12	DSAIGFSR	1	99
22	trm|Q5DSM0|Q5DSM0_HUMAN	Growth-inhibiting protein 12	DSPIQCIQAIAENR	1	99
22	trm|Q5DSM0|Q5DSM0_HUMAN	Growth-inhibiting protein 12	ESTVFEDLSDEAERDEYELLCPDNTR	1	99
22	trm|Q5DSM0|Q5DSM0_HUMAN	Growth-inhibiting protein 12	NLLFNDNTECLAR	1	99
22	trm|Q5DSM0|Q5DSM0_HUMAN	Growth-inhibiting protein 12	YLGPQYVAGITNLK	1	99
22	trm|Q5DSM0|Q5DSM0_HUMAN	Growth-inhibiting protein 12	YYGYTGAFR	1	99
23	trm|Q6PJA4|Q6PJA4_HUMAN	IGHG1 protein	AEDTAVYYCAR	1	99
23	trm|Q6PJA4|Q6PJA4_HUMAN	IGHG1 protein	ALPAPIEK	1	99
23	trm|Q6PJA4|Q6PJA4_HUMAN	IGHG1 protein	EPQVYTLPPSR	1	99
23	trm|Q6PJA4|Q6PJA4_HUMAN	IGHG1 protein	EVQLVESGGGLVQPGGSLR	1	99
23	trm|Q6PJA4|Q6PJA4_HUMAN	IGHG1 protein	GFYPSDIAVEWESNGQPENNYK	1	99
23	trm|Q6PJA4|Q6PJA4_HUMAN	IGHG1 protein	GPSVFPLAPSSK	1	99
23	trm|Q6PJA4|Q6PJA4_HUMAN	IGHG1 protein	STSGGTAALGCLVK	1	99
23	trm|Q6PJA4|Q6PJA4_HUMAN	IGHG1 protein	TTPPVLDSDGSFFLYSK	1	99
24	spt|Q01995|TAGL_HUMAN	Transgelin (Smooth muscle protein 22-alpha) (SM22-alpha) (WS3-10) (22 kDa actin-binding protein)	AAEDYGVIK	2	99
24	spt|Q01995|TAGL_HUMAN	Transgelin (Smooth muscle protein 22-alpha) (SM22-alpha) (WS3-10) (22 kDa actin-binding protein)	ANKGPSYGMSR	5	99
24	spt|Q01995|TAGL_HUMAN	Transgelin (Smooth muscle protein 22-alpha) (SM22-alpha) (WS3-10) (22 kDa actin-binding protein)	EFTESQLQEGK	6	99
24	spt|Q01995|TAGL_HUMAN	Transgelin (Smooth muscle protein 22-alpha) (SM22-alpha) (WS3-10) (22 kDa actin-binding protein)	GASQAGMTGYGR	1	99
24	spt|Q01995|TAGL_HUMAN	Transgelin (Smooth muscle protein 22-alpha) (SM22-alpha) (WS3-10) (22 kDa actin-binding protein)	GASQAGMTGYGRPR	5	99
24	spt|Q01995|TAGL_HUMAN	Transgelin (Smooth muscle protein 22-alpha) (SM22-alpha) (WS3-10) (22 kDa actin-binding protein)	GDPNWFMK	4	99
24	spt|Q01995|TAGL_HUMAN	Transgelin (Smooth muscle protein 22-alpha) (SM22-alpha) (WS3-10) (22 kDa actin-binding protein)	HVIGLQMGSN	3	99
24	spt|Q01995|TAGL_HUMAN	Transgelin (Smooth muscle protein 22-alpha) (SM22-alpha) (WS3-10) (22 kDa actin-binding protein)	HVIGLQMGSNR	3	99
24	spt|Q01995|TAGL_HUMAN	Transgelin (Smooth muscle protein 22-alpha) (SM22-alpha) (WS3-10) (22 kDa actin-binding protein)	KYDEELEER	4	99
24	spt|Q01995|TAGL_HUMAN	Transgelin (Smooth muscle protein 22-alpha) (SM22-alpha) (WS3-10) (22 kDa actin-binding protein)	QMEQVAQFLK	6	99
24	spt|Q01995|TAGL_HUMAN	Transgelin (Smooth muscle protein 22-alpha) (SM22-alpha) (WS3-10) (22 kDa actin-binding protein)	TDMFQTVDLFEGK	2	99
24	spt|Q01995|TAGL_HUMAN	Transgelin (Smooth muscle protein 22-alpha) (SM22-alpha) (WS3-10) (22 kDa actin-binding protein)	TLMALGSLAVTK	4	99
24	spt|Q01995|TAGL_HUMAN	Transgelin (Smooth muscle protein 22-alpha) (SM22-alpha) (WS3-10) (22 kDa actin-binding protein)	VPENPPSMVFK	4	99
24	spt|Q01995|TAGL_HUMAN	Transgelin (Smooth muscle protein 22-alpha) (SM22-alpha) (WS3-10) (22 kDa actin-binding protein)	YDEELEER	2	99
25	trm|Q8N473|Q8N473_HUMAN	"Collagen, type I, alpha 1 "	DGEAGAQGPPGPAGPAGER	9	99
25	trm|Q8N473|Q8N473_HUMAN	"Collagen, type I, alpha 1 "	DGLNGLPGPIGPPGPR	10	99
25	trm|Q8N473|Q8N473_HUMAN	"Collagen, type I, alpha 1 "	GAAGEPGKAGER	1	99
25	trm|Q8N473|Q8N473_HUMAN	"Collagen, type I, alpha 1 "	GADGSPGKDGVR	6	99
25	trm|Q8N473|Q8N473_HUMAN	"Collagen, type I, alpha 1 "	GANGAPGIAGAPGFPGAR	13	99
25	trm|Q8N473|Q8N473_HUMAN	"Collagen, type I, alpha 1 "	GARGEPGPTGLPGPPGER	7	99
25	trm|Q8N473|Q8N473_HUMAN	"Collagen, type I, alpha 1 "	GDAGAPGAPGSQGAPGLQGMPGER	10	99
25	trm|Q8N473|Q8N473_HUMAN	"Collagen, type I, alpha 1 "	GDAGPAGPKGEPGSPGENGAPGQMGPR	5	99
25	trm|Q8N473|Q8N473_HUMAN	"Collagen, type I, alpha 1 "	GDAGPPGPAGPAGPPGPIGNVGAPGAKGAR	8	99
25	trm|Q8N473|Q8N473_HUMAN	"Collagen, type I, alpha 1 "	GDRGETGPAGPPGAPGAPGAPGPVGPAGK	5	99
25	trm|Q8N473|Q8N473_HUMAN	"Collagen, type I, alpha 1 "	GEPGPPGPAGAAGPAGNPGADGQPGAK	9	99
25	trm|Q8N473|Q8N473_HUMAN	"Collagen, type I, alpha 1 "	GEPGPTGLPGPPGER	10	99
25	trm|Q8N473|Q8N473_HUMAN	"Collagen, type I, alpha 1 "	GEPGPVGVQGPPGPAGEEGKR	2	99
25	trm|Q8N473|Q8N473_HUMAN	"Collagen, type I, alpha 1 "	GETGPAGPAGPVGPVGAR	11	99
25	trm|Q8N473|Q8N473_HUMAN	"Collagen, type I, alpha 1 "	GETGPAGPPGAPGAPGAPGPVGPAGK	6	99
25	trm|Q8N473|Q8N473_HUMAN	"Collagen, type I, alpha 1 "	GETGPAGRPGEVGPPGPPGPAGEK	8	99
25	trm|Q8N473|Q8N473_HUMAN	"Collagen, type I, alpha 1 "	GFPGADGVAGPK	8	99
25	trm|Q8N473|Q8N473_HUMAN	"Collagen, type I, alpha 1 "	GFSGLDGAK	8	99
25	trm|Q8N473|Q8N473_HUMAN	"Collagen, type I, alpha 1 "	GFSGLQGPPGPPGSPGEQGPSGASGPAGPR	9	99
25	trm|Q8N473|Q8N473_HUMAN	"Collagen, type I, alpha 1 "	GLTGPIGPPGPAGAPGDKGESGPSGPAGPTGAR	7	99
25	trm|Q8N473|Q8N473_HUMAN	"Collagen, type I, alpha 1 "	GLTGSPGSPGPDGK	9	99
25	trm|Q8N473|Q8N473_HUMAN	"Collagen, type I, alpha 1 "	GPAGPQGPR	4	99
25	trm|Q8N473|Q8N473_HUMAN	"Collagen, type I, alpha 1 "	GPAGPQGPRGDKGETGEQGDR	7	99
25	trm|Q8N473|Q8N473_HUMAN	"Collagen, type I, alpha 1 "	GPPGPMGPPGLAGPPGESGR	7	99
25	trm|Q8N473|Q8N473_HUMAN	"Collagen, type I, alpha 1 "	GPPGSAGAPGKDGLNGLPGPIGPPGPR	6	99
25	trm|Q8N473|Q8N473_HUMAN	"Collagen, type I, alpha 1 "	GPSGPQGPGGPPGPK	10	99
25	trm|Q8N473|Q8N473_HUMAN	"Collagen, type I, alpha 1 "	GRPGAPGPAGAR	9	99
25	trm|Q8N473|Q8N473_HUMAN	"Collagen, type I, alpha 1 "	GSAGPPGATGFPGAAGR	10	99
25	trm|Q8N473|Q8N473_HUMAN	"Collagen, type I, alpha 1 "	GSPGADGPAGAPGT	5	99
25	trm|Q8N473|Q8N473_HUMAN	"Collagen, type I, alpha 1 "	GSPGADGPAGAPGTPGPQGIAGQR	8	99
25	trm|Q8N473|Q8N473_HUMAN	"Collagen, type I, alpha 1 "	GSPGEAGRPGEAGLPGAK	10	99
25	trm|Q8N473|Q8N473_HUMAN	"Collagen, type I, alpha 1 "	GVPGPPGAVGPAGK	2	99
25	trm|Q8N473|Q8N473_HUMAN	"Collagen, type I, alpha 1 "	GVPGPPGAVGPAGKDGEAGAQGPPGPAGPAGER	3	99
25	trm|Q8N473|Q8N473_HUMAN	"Collagen, type I, alpha 1 "	GVQGPPGPAGPR	12	99
25	trm|Q8N473|Q8N473_HUMAN	"Collagen, type I, alpha 1 "	PGEVGPPGPPGPAGEK	3	99
25	trm|Q8N473|Q8N473_HUMAN	"Collagen, type I, alpha 1 "	SGDRGETGPAGPAGPVGPVGAR	9	99
25	trm|Q8N473|Q8N473_HUMAN	"Collagen, type I, alpha 1 "	STGGISVPGPMGPSGPR	13	99
25	trm|Q8N473|Q8N473_HUMAN	"Collagen, type I, alpha 1 "	TGPAGPAGPVGPVGAR	1	99
25	trm|Q8N473|Q8N473_HUMAN	"Collagen, type I, alpha 1 "	TGPPGPAGQDGRPGPPGPPGAR	10	99
25	trm|Q8N473|Q8N473_HUMAN	"Collagen, type I, alpha 1 "	VGPPGPSGNAGPPGPPGPAGK	11	99
26	spt|P30101|PDIA3_HUMAN	Protein disulfide-isomerase A3 precursor (EC 5.3.4.1) (Disulfide isomerase ER-60) (ERp60) (58 kDa microsomal protein) (p58) (ERp57) (58 kDa glucose-regulated protein)	DASIVGFFDDSFSEAHSEFLK	2	99
26	spt|P30101|PDIA3_HUMAN	Protein disulfide-isomerase A3 precursor (EC 5.3.4.1) (Disulfide isomerase ER-60) (ERp60) (58 kDa microsomal protein) (p58) (ERp57) (58 kDa glucose-regulated protein)	DGEEAGAYDGPR	10	99
26	spt|P30101|PDIA3_HUMAN	Protein disulfide-isomerase A3 precursor (EC 5.3.4.1) (Disulfide isomerase ER-60) (ERp60) (58 kDa microsomal protein) (p58) (ERp57) (58 kDa glucose-regulated protein)	DLLIAYYDVDYEK	4	99
26	spt|P30101|PDIA3_HUMAN	Protein disulfide-isomerase A3 precursor (EC 5.3.4.1) (Disulfide isomerase ER-60) (ERp60) (58 kDa microsomal protein) (p58) (ERp57) (58 kDa glucose-regulated protein)	EATNPPVIQEEKPK	13	99
26	spt|P30101|PDIA3_HUMAN	Protein disulfide-isomerase A3 precursor (EC 5.3.4.1) (Disulfide isomerase ER-60) (ERp60) (58 kDa microsomal protein) (p58) (ERp57) (58 kDa glucose-regulated protein)	ELSDFISYLQR	14	99
26	spt|P30101|PDIA3_HUMAN	Protein disulfide-isomerase A3 precursor (EC 5.3.4.1) (Disulfide isomerase ER-60) (ERp60) (58 kDa microsomal protein) (p58) (ERp57) (58 kDa glucose-regulated protein)	FIQENIFGICPHMTEDNKDLIQGK	5	99
26	spt|P30101|PDIA3_HUMAN	Protein disulfide-isomerase A3 precursor (EC 5.3.4.1) (Disulfide isomerase ER-60) (ERp60) (58 kDa microsomal protein) (p58) (ERp57) (58 kDa glucose-regulated protein)	FLQDYFDGNLK	8	99
26	spt|P30101|PDIA3_HUMAN	Protein disulfide-isomerase A3 precursor (EC 5.3.4.1) (Disulfide isomerase ER-60) (ERp60) (58 kDa microsomal protein) (p58) (ERp57) (58 kDa glucose-regulated protein)	FLQDYFDGNLKR	10	99
26	spt|P30101|PDIA3_HUMAN	Protein disulfide-isomerase A3 precursor (EC 5.3.4.1) (Disulfide isomerase ER-60) (ERp60) (58 kDa microsomal protein) (p58) (ERp57) (58 kDa glucose-regulated protein)	FVMQEEFSR	16	99
26	spt|P30101|PDIA3_HUMAN	Protein disulfide-isomerase A3 precursor (EC 5.3.4.1) (Disulfide isomerase ER-60) (ERp60) (58 kDa microsomal protein) (p58) (ERp57) (58 kDa glucose-regulated protein)	GFPTIYFSPANK	20	99
26	spt|P30101|PDIA3_HUMAN	Protein disulfide-isomerase A3 precursor (EC 5.3.4.1) (Disulfide isomerase ER-60) (ERp60) (58 kDa microsomal protein) (p58) (ERp57) (58 kDa glucose-regulated protein)	GVALLLAAARLAAASDVLELTDDNFESR	7	99
26	spt|P30101|PDIA3_HUMAN	Protein disulfide-isomerase A3 precursor (EC 5.3.4.1) (Disulfide isomerase ER-60) (ERp60) (58 kDa microsomal protein) (p58) (ERp57) (58 kDa glucose-regulated protein)	IFRDGEEAGAYDGPR	14	99
26	spt|P30101|PDIA3_HUMAN	Protein disulfide-isomerase A3 precursor (EC 5.3.4.1) (Disulfide isomerase ER-60) (ERp60) (58 kDa microsomal protein) (p58) (ERp57) (58 kDa glucose-regulated protein)	ISDTGSAGLMLVEFF	1	99
26	spt|P30101|PDIA3_HUMAN	Protein disulfide-isomerase A3 precursor (EC 5.3.4.1) (Disulfide isomerase ER-60) (ERp60) (58 kDa microsomal protein) (p58) (ERp57) (58 kDa glucose-regulated protein)	LAPEYEAAATR	17	99
26	spt|P30101|PDIA3_HUMAN	Protein disulfide-isomerase A3 precursor (EC 5.3.4.1) (Disulfide isomerase ER-60) (ERp60) (58 kDa microsomal protein) (p58) (ERp57) (58 kDa glucose-regulated protein)	LKGIVPLAK	2	99
26	spt|P30101|PDIA3_HUMAN	Protein disulfide-isomerase A3 precursor (EC 5.3.4.1) (Disulfide isomerase ER-60) (ERp60) (58 kDa microsomal protein) (p58) (ERp57) (58 kDa glucose-regulated protein)	LNFAVASR	10	99
26	spt|P30101|PDIA3_HUMAN	Protein disulfide-isomerase A3 precursor (EC 5.3.4.1) (Disulfide isomerase ER-60) (ERp60) (58 kDa microsomal protein) (p58) (ERp57) (58 kDa glucose-regulated protein)	LSKDPNIVIAK	15	99
26	spt|P30101|PDIA3_HUMAN	Protein disulfide-isomerase A3 precursor (EC 5.3.4.1) (Disulfide isomerase ER-60) (ERp60) (58 kDa microsomal protein) (p58) (ERp57) (58 kDa glucose-regulated protein)	MDATANDVPSPYEVR	16	99
26	spt|P30101|PDIA3_HUMAN	Protein disulfide-isomerase A3 precursor (EC 5.3.4.1) (Disulfide isomerase ER-60) (ERp60) (58 kDa microsomal protein) (p58) (ERp57) (58 kDa glucose-regulated protein)	QAGPASVPLR	11	99
26	spt|P30101|PDIA3_HUMAN	Protein disulfide-isomerase A3 precursor (EC 5.3.4.1) (Disulfide isomerase ER-60) (ERp60) (58 kDa microsomal protein) (p58) (ERp57) (58 kDa glucose-regulated protein)	QAGPASVPLRTEEEFKK	11	99
26	spt|P30101|PDIA3_HUMAN	Protein disulfide-isomerase A3 precursor (EC 5.3.4.1) (Disulfide isomerase ER-60) (ERp60) (58 kDa microsomal protein) (p58) (ERp57) (58 kDa glucose-regulated protein)	RLAPEYEAAATR	9	99
26	spt|P30101|PDIA3_HUMAN	Protein disulfide-isomerase A3 precursor (EC 5.3.4.1) (Disulfide isomerase ER-60) (ERp60) (58 kDa microsomal protein) (p58) (ERp57) (58 kDa glucose-regulated protein)	SDVLELTDDNFESR	19	99
26	spt|P30101|PDIA3_HUMAN	Protein disulfide-isomerase A3 precursor (EC 5.3.4.1) (Disulfide isomerase ER-60) (ERp60) (58 kDa microsomal protein) (p58) (ERp57) (58 kDa glucose-regulated protein)	SEPIPESNDGPVK	14	99
26	spt|P30101|PDIA3_HUMAN	Protein disulfide-isomerase A3 precursor (EC 5.3.4.1) (Disulfide isomerase ER-60) (ERp60) (58 kDa microsomal protein) (p58) (ERp57) (58 kDa glucose-regulated protein)	TADGIVSHLK	9	99
26	spt|P30101|PDIA3_HUMAN	Protein disulfide-isomerase A3 precursor (EC 5.3.4.1) (Disulfide isomerase ER-60) (ERp60) (58 kDa microsomal protein) (p58) (ERp57) (58 kDa glucose-regulated protein)	TADGIVSHLKK	5	99
26	spt|P30101|PDIA3_HUMAN	Protein disulfide-isomerase A3 precursor (EC 5.3.4.1) (Disulfide isomerase ER-60) (ERp60) (58 kDa microsomal protein) (p58) (ERp57) (58 kDa glucose-regulated protein)	TFSHELSDFGLESTAGEIPVVAIR	4	99
26	spt|P30101|PDIA3_HUMAN	Protein disulfide-isomerase A3 precursor (EC 5.3.4.1) (Disulfide isomerase ER-60) (ERp60) (58 kDa microsomal protein) (p58) (ERp57) (58 kDa glucose-regulated protein)	YGVSGYPTLK	7	99
27	trm|Q6FHZ0|Q6FHZ0_HUMAN	MDH2 protein	AGAGSATLSMAYAGAR	15	99
27	trm|Q6FHZ0|Q6FHZ0_HUMAN	MDH2 protein	ANTFVAELK	5	99
27	trm|Q6FHZ0|Q6FHZ0_HUMAN	MDH2 protein	FVFSLVDAMNGK	6	99
27	trm|Q6FHZ0|Q6FHZ0_HUMAN	MDH2 protein	GCDVVVIPAGVPR	11	99
27	trm|Q6FHZ0|Q6FHZ0_HUMAN	MDH2 protein	GYLGPEQLPDCLK	13	99
27	trm|Q6FHZ0|Q6FHZ0_HUMAN	MDH2 protein	IFGVTTLDIVR	11	99
27	trm|Q6FHZ0|Q6FHZ0_HUMAN	MDH2 protein	IQEAGTEVVK	8	99
27	trm|Q6FHZ0|Q6FHZ0_HUMAN	MDH2 protein	LTLYDIAHTPGVAADLSHIETK	7	99
27	trm|Q6FHZ0|Q6FHZ0_HUMAN	MDH2 protein	MISDAIPELK	12	99
27	trm|Q6FHZ0|Q6FHZ0_HUMAN	MDH2 protein	SQETECTYFSTPLLLGK	10	99
27	trm|Q6FHZ0|Q6FHZ0_HUMAN	MDH2 protein	TIIPLISQCTPK	13	99
27	trm|Q6FHZ0|Q6FHZ0_HUMAN	MDH2 protein	VAVLGASGGIGQPLSLLLK	11	99
27	trm|Q6FHZ0|Q6FHZ0_HUMAN	MDH2 protein	VDFPQDQLTALTGR	21	99
27	trm|Q6FHZ0|Q6FHZ0_HUMAN	MDH2 protein	VNVPVIGGHAGK	13	99
28	spt|P11142|HSP7C_HUMAN	Heat shock cognate 71 kDa protein (Heat shock 70 kDa protein 8)	ARFEELNADLFR	6	99
28	spt|P11142|HSP7C_HUMAN	Heat shock cognate 71 kDa protein (Heat shock 70 kDa protein 8)	CNEIINWLDK	4	99
28	spt|P11142|HSP7C_HUMAN	Heat shock cognate 71 kDa protein (Heat shock 70 kDa protein 8)	DAGTIAGLNVLR	16	99
28	spt|P11142|HSP7C_HUMAN	Heat shock cognate 71 kDa protein (Heat shock 70 kDa protein 8)	FEELNADLFR	12	99
28	spt|P11142|HSP7C_HUMAN	Heat shock cognate 71 kDa protein (Heat shock 70 kDa protein 8)	FELTGIPPAPR	9	99
28	spt|P11142|HSP7C_HUMAN	Heat shock cognate 71 kDa protein (Heat shock 70 kDa protein 8)	GPAVGIDLGTTY	6	99
28	spt|P11142|HSP7C_HUMAN	Heat shock cognate 71 kDa protein (Heat shock 70 kDa protein 8)	GTLDPVEK	6	99
28	spt|P11142|HSP7C_HUMAN	Heat shock cognate 71 kDa protein (Heat shock 70 kDa protein 8)	IINEPTAAAIAYGLDK	14	99
28	spt|P11142|HSP7C_HUMAN	Heat shock cognate 71 kDa protein (Heat shock 70 kDa protein 8)	IINEPTAAAIAYGLDKK	11	99
28	spt|P11142|HSP7C_HUMAN	Heat shock cognate 71 kDa protein (Heat shock 70 kDa protein 8)	ITITNDKGR	4	99
28	spt|P11142|HSP7C_HUMAN	Heat shock cognate 71 kDa protein (Heat shock 70 kDa protein 8)	LDKSQIHDIVLVGGSTR	2	99
28	spt|P11142|HSP7C_HUMAN	Heat shock cognate 71 kDa protein (Heat shock 70 kDa protein 8)	LLQDFFNGK	10	99
28	spt|P11142|HSP7C_HUMAN	Heat shock cognate 71 kDa protein (Heat shock 70 kDa protein 8)	LLQDFFNGKELNK	3	99
28	spt|P11142|HSP7C_HUMAN	Heat shock cognate 71 kDa protein (Heat shock 70 kDa protein 8)	LSKEDIER	10	99
28	spt|P11142|HSP7C_HUMAN	Heat shock cognate 71 kDa protein (Heat shock 70 kDa protein 8)	MKEIAEAYLGK	7	99
28	spt|P11142|HSP7C_HUMAN	Heat shock cognate 71 kDa protein (Heat shock 70 kDa protein 8)	MVNHFIAEFK	9	99
28	spt|P11142|HSP7C_HUMAN	Heat shock cognate 71 kDa protein (Heat shock 70 kDa protein 8)	NQTAEKEEFEHQQK	3	99
28	spt|P11142|HSP7C_HUMAN	Heat shock cognate 71 kDa protein (Heat shock 70 kDa protein 8)	NQVAMNPTNTVFDAK	14	99
28	spt|P11142|HSP7C_HUMAN	Heat shock cognate 71 kDa protein (Heat shock 70 kDa protein 8)	NQVAMNPTNTVFDAKR	9	99
28	spt|P11142|HSP7C_HUMAN	Heat shock cognate 71 kDa protein (Heat shock 70 kDa protein 8)	NSLESYAFNMK	10	99
28	spt|P11142|HSP7C_HUMAN	Heat shock cognate 71 kDa protein (Heat shock 70 kDa protein 8)	QATKDAGTIAGLNVLR	10	99
28	spt|P11142|HSP7C_HUMAN	Heat shock cognate 71 kDa protein (Heat shock 70 kDa protein 8)	QTQTFTTYSDNQPGVLIQVYEGER	10	99
28	spt|P11142|HSP7C_HUMAN	Heat shock cognate 71 kDa protein (Heat shock 70 kDa protein 8)	SCVGVFQHGK	3	99
28	spt|P11142|HSP7C_HUMAN	Heat shock cognate 71 kDa protein (Heat shock 70 kDa protein 8)	SFYPEEVSSMVLTK	7	99
28	spt|P11142|HSP7C_HUMAN	Heat shock cognate 71 kDa protein (Heat shock 70 kDa protein 8)	SINPDEAVAYGAAVQAAILSGDK	11	99
28	spt|P11142|HSP7C_HUMAN	Heat shock cognate 71 kDa protein (Heat shock 70 kDa protein 8)	SQIHDIVLVGGSTR	8	99
28	spt|P11142|HSP7C_HUMAN	Heat shock cognate 71 kDa protein (Heat shock 70 kDa protein 8)	STAGDTHLGGED	1	99
28	spt|P11142|HSP7C_HUMAN	Heat shock cognate 71 kDa protein (Heat shock 70 kDa protein 8)	STAGDTHLGGEDFDNR	12	99
28	spt|P11142|HSP7C_HUMAN	Heat shock cognate 71 kDa protein (Heat shock 70 kDa protein 8)	TTPSYVAFTDTER	16	99
28	spt|P11142|HSP7C_HUMAN	Heat shock cognate 71 kDa protein (Heat shock 70 kDa protein 8)	TVTNAVVTVPAYFNDSQR	12	99
28	spt|P11142|HSP7C_HUMAN	Heat shock cognate 71 kDa protein (Heat shock 70 kDa protein 8)	VCNPIITK	10	99
28	spt|P11142|HSP7C_HUMAN	Heat shock cognate 71 kDa protein (Heat shock 70 kDa protein 8)	VEIIANDQGNR	15	99
28	spt|P11142|HSP7C_HUMAN	Heat shock cognate 71 kDa protein (Heat shock 70 kDa protein 8)	VQVEYKGETK	8	99
29	spt|P06396|GELS_HUMAN	Gelsolin precursor (Actin-depolymerizing factor) (ADF) (Brevin) (AGEL)	AGALNSNDAFVLK	16	99
29	spt|P06396|GELS_HUMAN	Gelsolin precursor (Actin-depolymerizing factor) (ADF) (Brevin) (AGEL)	AQPVQVAEGSEPDGFWEALGGK	16	99
29	spt|P06396|GELS_HUMAN	Gelsolin precursor (Actin-depolymerizing factor) (ADF) (Brevin) (AGEL)	DSQEEEKTEALTSAK	4	99
29	spt|P06396|GELS_HUMAN	Gelsolin precursor (Actin-depolymerizing factor) (ADF) (Brevin) (AGEL)	EGGQTAPASTR	14	99
29	spt|P06396|GELS_HUMAN	Gelsolin precursor (Actin-depolymerizing factor) (ADF) (Brevin) (AGEL)	EVQGFESATFLGYFK	5	99
29	spt|P06396|GELS_HUMAN	Gelsolin precursor (Actin-depolymerizing factor) (ADF) (Brevin) (AGEL)	GASQAGAPQGR	8	99
29	spt|P06396|GELS_HUMAN	Gelsolin precursor (Actin-depolymerizing factor) (ADF) (Brevin) (AGEL)	HVVPNEVVVQR	9	99
29	spt|P06396|GELS_HUMAN	Gelsolin precursor (Actin-depolymerizing factor) (ADF) (Brevin) (AGEL)	KGGVASGFK	2	99
29	spt|P06396|GELS_HUMAN	Gelsolin precursor (Actin-depolymerizing factor) (ADF) (Brevin) (AGEL)	LKATQVSK	7	99
29	spt|P06396|GELS_HUMAN	Gelsolin precursor (Actin-depolymerizing factor) (ADF) (Brevin) (AGEL)	NWRDPDQTDGLGLSYLSSHIANVER	2	99
29	spt|P06396|GELS_HUMAN	Gelsolin precursor (Actin-depolymerizing factor) (ADF) (Brevin) (AGEL)	QTQVSVLPEGGETPLFK	7	99
29	spt|P06396|GELS_HUMAN	Gelsolin precursor (Actin-depolymerizing factor) (ADF) (Brevin) (AGEL)	SEDCFILDHGK	5	99
29	spt|P06396|GELS_HUMAN	Gelsolin precursor (Actin-depolymerizing factor) (ADF) (Brevin) (AGEL)	SLVADENPFAQGALK	1	99
29	spt|P06396|GELS_HUMAN	Gelsolin precursor (Actin-depolymerizing factor) (ADF) (Brevin) (AGEL)	TASDFITK	12	99
29	spt|P06396|GELS_HUMAN	Gelsolin precursor (Actin-depolymerizing factor) (ADF) (Brevin) (AGEL)	TGAQELLR	12	99
29	spt|P06396|GELS_HUMAN	Gelsolin precursor (Actin-depolymerizing factor) (ADF) (Brevin) (AGEL)	TPSAAYLWVGTGASEAEK	13	99
29	spt|P06396|GELS_HUMAN	Gelsolin precursor (Actin-depolymerizing factor) (ADF) (Brevin) (AGEL)	VSNGAGTMSVSLVADENPFAQGALK	11	99
29	spt|P06396|GELS_HUMAN	Gelsolin precursor (Actin-depolymerizing factor) (ADF) (Brevin) (AGEL)	VVEHPEFLK	13	99
29	spt|P06396|GELS_HUMAN	Gelsolin precursor (Actin-depolymerizing factor) (ADF) (Brevin) (AGEL)	YIETDPANR	10	99
30	spt|P14625|ENPL_HUMAN	Endoplasmin precursor (Heat shock protein 90 kDa beta member 1) (94 kDa glucose-regulated protein) (GRP94) (gp96 homolog) (Tumor rejection antigen 1)	DDEVDVDGTVEEDLGK	6	99
30	spt|P14625|ENPL_HUMAN	Endoplasmin precursor (Heat shock protein 90 kDa beta member 1) (94 kDa glucose-regulated protein) (GRP94) (gp96 homolog) (Tumor rejection antigen 1)	DISTNYYASQK	6	99
30	spt|P14625|ENPL_HUMAN	Endoplasmin precursor (Heat shock protein 90 kDa beta member 1) (94 kDa glucose-regulated protein) (GRP94) (gp96 homolog) (Tumor rejection antigen 1)	EAESSPFVER	11	99
30	spt|P14625|ENPL_HUMAN	Endoplasmin precursor (Heat shock protein 90 kDa beta member 1) (94 kDa glucose-regulated protein) (GRP94) (gp96 homolog) (Tumor rejection antigen 1)	EEEAIQLDGLNASQIR	15	99
30	spt|P14625|ENPL_HUMAN	Endoplasmin precursor (Heat shock protein 90 kDa beta member 1) (94 kDa glucose-regulated protein) (GRP94) (gp96 homolog) (Tumor rejection antigen 1)	EFEPLLNWMK	6	99
30	spt|P14625|ENPL_HUMAN	Endoplasmin precursor (Heat shock protein 90 kDa beta member 1) (94 kDa glucose-regulated protein) (GRP94) (gp96 homolog) (Tumor rejection antigen 1)	ELISNASDALDK	7	99
30	spt|P14625|ENPL_HUMAN	Endoplasmin precursor (Heat shock protein 90 kDa beta member 1) (94 kDa glucose-regulated protein) (GRP94) (gp96 homolog) (Tumor rejection antigen 1)	ELISNASDALDKIR	9	99
30	spt|P14625|ENPL_HUMAN	Endoplasmin precursor (Heat shock protein 90 kDa beta member 1) (94 kDa glucose-regulated protein) (GRP94) (gp96 homolog) (Tumor rejection antigen 1)	FAFQAEVNR	11	99
30	spt|P14625|ENPL_HUMAN	Endoplasmin precursor (Heat shock protein 90 kDa beta member 1) (94 kDa glucose-regulated protein) (GRP94) (gp96 homolog) (Tumor rejection antigen 1)	GLFDEYGSK	13	99
30	spt|P14625|ENPL_HUMAN	Endoplasmin precursor (Heat shock protein 90 kDa beta member 1) (94 kDa glucose-regulated protein) (GRP94) (gp96 homolog) (Tumor rejection antigen 1)	GVVDSDDLPLNVSR	21	99
30	spt|P14625|ENPL_HUMAN	Endoplasmin precursor (Heat shock protein 90 kDa beta member 1) (94 kDa glucose-regulated protein) (GRP94) (gp96 homolog) (Tumor rejection antigen 1)	IYFMAGSSR	14	99
30	spt|P14625|ENPL_HUMAN	Endoplasmin precursor (Heat shock protein 90 kDa beta member 1) (94 kDa glucose-regulated protein) (GRP94) (gp96 homolog) (Tumor rejection antigen 1)	KEAESSPFVER	4	99
30	spt|P14625|ENPL_HUMAN	Endoplasmin precursor (Heat shock protein 90 kDa beta member 1) (94 kDa glucose-regulated protein) (GRP94) (gp96 homolog) (Tumor rejection antigen 1)	LGVIEDHSNR	8	99
30	spt|P14625|ENPL_HUMAN	Endoplasmin precursor (Heat shock protein 90 kDa beta member 1) (94 kDa glucose-regulated protein) (GRP94) (gp96 homolog) (Tumor rejection antigen 1)	LIINSLYK	1	99
30	spt|P14625|ENPL_HUMAN	Endoplasmin precursor (Heat shock protein 90 kDa beta member 1) (94 kDa glucose-regulated protein) (GRP94) (gp96 homolog) (Tumor rejection antigen 1)	LTESPCALVASQYGWSGNMER	10	99
30	spt|P14625|ENPL_HUMAN	Endoplasmin precursor (Heat shock protein 90 kDa beta member 1) (94 kDa glucose-regulated protein) (GRP94) (gp96 homolog) (Tumor rejection antigen 1)	NLLHVTDTGVGMTR	15	99
30	spt|P14625|ENPL_HUMAN	Endoplasmin precursor (Heat shock protein 90 kDa beta member 1) (94 kDa glucose-regulated protein) (GRP94) (gp96 homolog) (Tumor rejection antigen 1)	PSKEVEEDEYK	2	99
30	spt|P14625|ENPL_HUMAN	Endoplasmin precursor (Heat shock protein 90 kDa beta member 1) (94 kDa glucose-regulated protein) (GRP94) (gp96 homolog) (Tumor rejection antigen 1)	SGTSEFLNK	7	99
30	spt|P14625|ENPL_HUMAN	Endoplasmin precursor (Heat shock protein 90 kDa beta member 1) (94 kDa glucose-regulated protein) (GRP94) (gp96 homolog) (Tumor rejection antigen 1)	SGYLLPDTK	10	99
30	spt|P14625|ENPL_HUMAN	Endoplasmin precursor (Heat shock protein 90 kDa beta member 1) (94 kDa glucose-regulated protein) (GRP94) (gp96 homolog) (Tumor rejection antigen 1)	SILFVPTSAPR	21	99
30	spt|P14625|ENPL_HUMAN	Endoplasmin precursor (Heat shock protein 90 kDa beta member 1) (94 kDa glucose-regulated protein) (GRP94) (gp96 homolog) (Tumor rejection antigen 1)	TDDEVVQREEEAIQLDGLNASQIR	9	99
30	spt|P14625|ENPL_HUMAN	Endoplasmin precursor (Heat shock protein 90 kDa beta member 1) (94 kDa glucose-regulated protein) (GRP94) (gp96 homolog) (Tumor rejection antigen 1)	VEEEPEEEPEETAEDTTEDTEQDEDEEMDVGTDEEEETAK	1	99
30	spt|P14625|ENPL_HUMAN	Endoplasmin precursor (Heat shock protein 90 kDa beta member 1) (94 kDa glucose-regulated protein) (GRP94) (gp96 homolog) (Tumor rejection antigen 1)	VFITDDFHDMMPK	2	99
30	spt|P14625|ENPL_HUMAN	Endoplasmin precursor (Heat shock protein 90 kDa beta member 1) (94 kDa glucose-regulated protein) (GRP94) (gp96 homolog) (Tumor rejection antigen 1)	YSQFINFPIYVWSSK	1	99
31	trm|Q6NUR7|Q6NUR7_HUMAN	Villin 2 (Ezrin)	AKEAQDDLVK	8	99
31	trm|Q6NUR7|Q6NUR7_HUMAN	Villin 2 (Ezrin)	APDFVFYAPR	15	99
31	trm|Q6NUR7|Q6NUR7_HUMAN	Villin 2 (Ezrin)	AQEEAERLEADR	6	99
31	trm|Q6NUR7|Q6NUR7_HUMAN	Villin 2 (Ezrin)	EAQDDLVK	6	99
31	trm|Q6NUR7|Q6NUR7_HUMAN	Villin 2 (Ezrin)	FGDYNKEVHK	2	99
31	trm|Q6NUR7|Q6NUR7_HUMAN	Villin 2 (Ezrin)	FYPEDVAEELIQDITQK	5	99
31	trm|Q6NUR7|Q6NUR7_HUMAN	Villin 2 (Ezrin)	IALLEEAR	13	99
31	trm|Q6NUR7|Q6NUR7_HUMAN	Villin 2 (Ezrin)	IALLEEARR	2	99
31	trm|Q6NUR7|Q6NUR7_HUMAN	Villin 2 (Ezrin)	IGFPWSEIR	11	99
31	trm|Q6NUR7|Q6NUR7_HUMAN	Villin 2 (Ezrin)	KPDTIEVQQMK	3	99
31	trm|Q6NUR7|Q6NUR7_HUMAN	Villin 2 (Ezrin)	QAVDQIKSQEQLAAELAEYTAK	4	99
31	trm|Q6NUR7|Q6NUR7_HUMAN	Villin 2 (Ezrin)	QLLTLSSELSQAR	9	99
31	trm|Q6NUR7|Q6NUR7_HUMAN	Villin 2 (Ezrin)	SGYLSSER	4	99
31	trm|Q6NUR7|Q6NUR7_HUMAN	Villin 2 (Ezrin)	SQEQLAAELAEYTAK	14	99
32	spt|P68363|TBAK_HUMAN	Tubulin alpha-ubiquitous chain (Alpha-tubulin ubiquitous) (Tubulin K- alpha-1)	AVCMLSNTTAIAEAWAR	4	99
32	spt|P68363|TBAK_HUMAN	Tubulin alpha-ubiquitous chain (Alpha-tubulin ubiquitous) (Tubulin K- alpha-1)	AVFVDLEPTVIDEVR	11	99
32	spt|P68363|TBAK_HUMAN	Tubulin alpha-ubiquitous chain (Alpha-tubulin ubiquitous) (Tubulin K- alpha-1)	DLEPTVIDEVR	1	99
32	spt|P68363|TBAK_HUMAN	Tubulin alpha-ubiquitous chain (Alpha-tubulin ubiquitous) (Tubulin K- alpha-1)	DLTEFQTNLVPYPR	1	99
32	spt|P68363|TBAK_HUMAN	Tubulin alpha-ubiquitous chain (Alpha-tubulin ubiquitous) (Tubulin K- alpha-1)	DVNAAIATIK	11	99
32	spt|P68363|TBAK_HUMAN	Tubulin alpha-ubiquitous chain (Alpha-tubulin ubiquitous) (Tubulin K- alpha-1)	EDAANNYAR	7	99
32	spt|P68363|TBAK_HUMAN	Tubulin alpha-ubiquitous chain (Alpha-tubulin ubiquitous) (Tubulin K- alpha-1)	IHFPLATYAPVISAEK	10	99
32	spt|P68363|TBAK_HUMAN	Tubulin alpha-ubiquitous chain (Alpha-tubulin ubiquitous) (Tubulin K- alpha-1)	LSVDYGKK	6	99
32	spt|P68363|TBAK_HUMAN	Tubulin alpha-ubiquitous chain (Alpha-tubulin ubiquitous) (Tubulin K- alpha-1)	NLDIERPTYTNLNR	6	99
32	spt|P68363|TBAK_HUMAN	Tubulin alpha-ubiquitous chain (Alpha-tubulin ubiquitous) (Tubulin K- alpha-1)	NYQPPTVVPGGDLAK	1	99
32	spt|P68363|TBAK_HUMAN	Tubulin alpha-ubiquitous chain (Alpha-tubulin ubiquitous) (Tubulin K- alpha-1)	QLFHPEQLITGK	11	99
32	spt|P68363|TBAK_HUMAN	Tubulin alpha-ubiquitous chain (Alpha-tubulin ubiquitous) (Tubulin K- alpha-1)	QLFHPEQLITGKEDAANNYAR	8	99
32	spt|P68363|TBAK_HUMAN	Tubulin alpha-ubiquitous chain (Alpha-tubulin ubiquitous) (Tubulin K- alpha-1)	SIQFVDWCPTGFK	6	99
32	spt|P68363|TBAK_HUMAN	Tubulin alpha-ubiquitous chain (Alpha-tubulin ubiquitous) (Tubulin K- alpha-1)	TIGGGDDSFNTFF	6	99
32	spt|P68363|TBAK_HUMAN	Tubulin alpha-ubiquitous chain (Alpha-tubulin ubiquitous) (Tubulin K- alpha-1)	TIGGGDDSFNTFFSETGAGK	13	99
32	spt|P68363|TBAK_HUMAN	Tubulin alpha-ubiquitous chain (Alpha-tubulin ubiquitous) (Tubulin K- alpha-1)	TIQFVDWCPTGFK	1	99
32	spt|P68363|TBAK_HUMAN	Tubulin alpha-ubiquitous chain (Alpha-tubulin ubiquitous) (Tubulin K- alpha-1)	VDLEPTVIDEVR	3	99
32	spt|P68363|TBAK_HUMAN	Tubulin alpha-ubiquitous chain (Alpha-tubulin ubiquitous) (Tubulin K- alpha-1)	VDNEAIYDICR	1	99
32	spt|P68363|TBAK_HUMAN	Tubulin alpha-ubiquitous chain (Alpha-tubulin ubiquitous) (Tubulin K- alpha-1)	VGINYQPPTVVPGGDLAK	13	99
33	spt|P22314|UBE1_HUMAN	Ubiquitin-activating enzyme E1 (A1S9 protein)	AAVATFLQSVQVPEFTPK	18	99
33	spt|P22314|UBE1_HUMAN	Ubiquitin-activating enzyme E1 (A1S9 protein)	AENYDIPSADR	9	99
33	spt|P22314|UBE1_HUMAN	Ubiquitin-activating enzyme E1 (A1S9 protein)	AKNGSEADIDEGLYSR	2	99
33	spt|P22314|UBE1_HUMAN	Ubiquitin-activating enzyme E1 (A1S9 protein)	ALPAVQQNNLDEDLIR	12	99
33	spt|P22314|UBE1_HUMAN	Ubiquitin-activating enzyme E1 (A1S9 protein)	DNPGVVTCLDEAR	10	99
33	spt|P22314|UBE1_HUMAN	Ubiquitin-activating enzyme E1 (A1S9 protein)	GGIVSQVK	9	99
33	spt|P22314|UBE1_HUMAN	Ubiquitin-activating enzyme E1 (A1S9 protein)	GGIVSQVKVPK	4	99
33	spt|P22314|UBE1_HUMAN	Ubiquitin-activating enzyme E1 (A1S9 protein)	GLGVEIAK	3	99
33	spt|P22314|UBE1_HUMAN	Ubiquitin-activating enzyme E1 (A1S9 protein)	IHVSDQELQSANASVDDSR	8	99
33	spt|P22314|UBE1_HUMAN	Ubiquitin-activating enzyme E1 (A1S9 protein)	IYDDDFFQNLDGVANALDNVDAR	7	99
33	spt|P22314|UBE1_HUMAN	Ubiquitin-activating enzyme E1 (A1S9 protein)	KPLLESGTLGTK	9	99
33	spt|P22314|UBE1_HUMAN	Ubiquitin-activating enzyme E1 (A1S9 protein)	LAGTQPLEVLEAVQR	20	99
33	spt|P22314|UBE1_HUMAN	Ubiquitin-activating enzyme E1 (A1S9 protein)	LDQPMTEIVSR	18	99
33	spt|P22314|UBE1_HUMAN	Ubiquitin-activating enzyme E1 (A1S9 protein)	LKSDTAAAAVR	11	99
33	spt|P22314|UBE1_HUMAN	Ubiquitin-activating enzyme E1 (A1S9 protein)	LQTSSVLVSGLR	14	99
33	spt|P22314|UBE1_HUMAN	Ubiquitin-activating enzyme E1 (A1S9 protein)	NEEDAAELVALAQAVNAR	16	99
33	spt|P22314|UBE1_HUMAN	Ubiquitin-activating enzyme E1 (A1S9 protein)	NFPNAIEHTLQWAR	5	99
33	spt|P22314|UBE1_HUMAN	Ubiquitin-activating enzyme E1 (A1S9 protein)	NIILGGVK	10	99
33	spt|P22314|UBE1_HUMAN	Ubiquitin-activating enzyme E1 (A1S9 protein)	QFLFRPWDVTK	8	99
33	spt|P22314|UBE1_HUMAN	Ubiquitin-activating enzyme E1 (A1S9 protein)	QLYVLGHEAMK	9	99
33	spt|P22314|UBE1_HUMAN	Ubiquitin-activating enzyme E1 (A1S9 protein)	SIPICTLK	6	99
33	spt|P22314|UBE1_HUMAN	Ubiquitin-activating enzyme E1 (A1S9 protein)	SLVASLAEPDFVVTDFAK	16	99
33	spt|P22314|UBE1_HUMAN	Ubiquitin-activating enzyme E1 (A1S9 protein)	YDGQVAVFGSDLQEK	5	99
34	spt|Q9P2E9|RRBP1_HUMAN	Ribosome-binding protein 1 (Ribosome receptor protein) (180 kDa ribosome receptor homolog) (ES/130-related protein)	AENSQLTER	7	99
34	spt|Q9P2E9|RRBP1_HUMAN	Ribosome-binding protein 1 (Ribosome receptor protein) (180 kDa ribosome receptor homolog) (ES/130-related protein)	AQEQQQQMAELHSK	10	99
34	spt|Q9P2E9|RRBP1_HUMAN	Ribosome-binding protein 1 (Ribosome receptor protein) (180 kDa ribosome receptor homolog) (ES/130-related protein)	DALNQATSQVESK	8	99
34	spt|Q9P2E9|RRBP1_HUMAN	Ribosome-binding protein 1 (Ribosome receptor protein) (180 kDa ribosome receptor homolog) (ES/130-related protein)	DAQDVQASQAEADQQQTR	16	99
34	spt|Q9P2E9|RRBP1_HUMAN	Ribosome-binding protein 1 (Ribosome receptor protein) (180 kDa ribosome receptor homolog) (ES/130-related protein)	EQEITAVQAR	15	99
34	spt|Q9P2E9|RRBP1_HUMAN	Ribosome-binding protein 1 (Ribosome receptor protein) (180 kDa ribosome receptor homolog) (ES/130-related protein)	EVPMVVVPPVGAK	8	99
34	spt|Q9P2E9|RRBP1_HUMAN	Ribosome-binding protein 1 (Ribosome receptor protein) (180 kDa ribosome receptor homolog) (ES/130-related protein)	GQKGEGAQNQGK	1	99
34	spt|Q9P2E9|RRBP1_HUMAN	Ribosome-binding protein 1 (Ribosome receptor protein) (180 kDa ribosome receptor homolog) (ES/130-related protein)	KVEGAPTQGR	3	99
34	spt|Q9P2E9|RRBP1_HUMAN	Ribosome-binding protein 1 (Ribosome receptor protein) (180 kDa ribosome receptor homolog) (ES/130-related protein)	LKGELESSDQVR	2	99
34	spt|Q9P2E9|RRBP1_HUMAN	Ribosome-binding protein 1 (Ribosome receptor protein) (180 kDa ribosome receptor homolog) (ES/130-related protein)	LLATEQEDAAVAK	5	99
34	spt|Q9P2E9|RRBP1_HUMAN	Ribosome-binding protein 1 (Ribosome receptor protein) (180 kDa ribosome receptor homolog) (ES/130-related protein)	LQQENSILR	9	99
34	spt|Q9P2E9|RRBP1_HUMAN	Ribosome-binding protein 1 (Ribosome receptor protein) (180 kDa ribosome receptor homolog) (ES/130-related protein)	LQSSEAEVR	4	99
34	spt|Q9P2E9|RRBP1_HUMAN	Ribosome-binding protein 1 (Ribosome receptor protein) (180 kDa ribosome receptor homolog) (ES/130-related protein)	QLLLESQSQLDAAK	9	99
34	spt|Q9P2E9|RRBP1_HUMAN	Ribosome-binding protein 1 (Ribosome receptor protein) (180 kDa ribosome receptor homolog) (ES/130-related protein)	QVLQLQASHR	11	99
34	spt|Q9P2E9|RRBP1_HUMAN	Ribosome-binding protein 1 (Ribosome receptor protein) (180 kDa ribosome receptor homolog) (ES/130-related protein)	SIEALLEAGQAR	15	99
34	spt|Q9P2E9|RRBP1_HUMAN	Ribosome-binding protein 1 (Ribosome receptor protein) (180 kDa ribosome receptor homolog) (ES/130-related protein)	SILAETEGMLR	8	99
34	spt|Q9P2E9|RRBP1_HUMAN	Ribosome-binding protein 1 (Ribosome receptor protein) (180 kDa ribosome receptor homolog) (ES/130-related protein)	TAGPLESSETEEASQLKER	5	99
34	spt|Q9P2E9|RRBP1_HUMAN	Ribosome-binding protein 1 (Ribosome receptor protein) (180 kDa ribosome receptor homolog) (ES/130-related protein)	TLQEQLENGPNTQLAR	7	99
34	spt|Q9P2E9|RRBP1_HUMAN	Ribosome-binding protein 1 (Ribosome receptor protein) (180 kDa ribosome receptor homolog) (ES/130-related protein)	TLVSTVGSMVFNEGEAQR	9	99
34	spt|Q9P2E9|RRBP1_HUMAN	Ribosome-binding protein 1 (Ribosome receptor protein) (180 kDa ribosome receptor homolog) (ES/130-related protein)	TQLEWTEAILEDEQTQR	15	99
34	spt|Q9P2E9|RRBP1_HUMAN	Ribosome-binding protein 1 (Ribosome receptor protein) (180 kDa ribosome receptor homolog) (ES/130-related protein)	VEGAPTQGR	6	99
34	spt|Q9P2E9|RRBP1_HUMAN	Ribosome-binding protein 1 (Ribosome receptor protein) (180 kDa ribosome receptor homolog) (ES/130-related protein)	VEPAVSSVVNSIQVLTSK	11	99
35	trm|Q6FHP9|Q6FHP9_HUMAN	Triosephosphate isomerase (EC 5.3.1.1) (TIM) (Triose-phosphate isomerase) (Fragment)	DCGATWVVLGHSER	10	99
35	trm|Q6FHP9|Q6FHP9_HUMAN	Triosephosphate isomerase (EC 5.3.1.1) (TIM) (Triose-phosphate isomerase) (Fragment)	ELASQPDVDGFLVGGASLKPEFVDIINAK	6	99
35	trm|Q6FHP9|Q6FHP9_HUMAN	Triosephosphate isomerase (EC 5.3.1.1) (TIM) (Triose-phosphate isomerase) (Fragment)	ELASQPDVDGFLVGGASLKPEFVDIINAKQ	3	99
35	trm|Q6FHP9|Q6FHP9_HUMAN	Triosephosphate isomerase (EC 5.3.1.1) (TIM) (Triose-phosphate isomerase) (Fragment)	FFVGGNWK	10	99
35	trm|Q6FHP9|Q6FHP9_HUMAN	Triosephosphate isomerase (EC 5.3.1.1) (TIM) (Triose-phosphate isomerase) (Fragment)	HVFGESDELIGQK	10	99
35	trm|Q6FHP9|Q6FHP9_HUMAN	Triosephosphate isomerase (EC 5.3.1.1) (TIM) (Triose-phosphate isomerase) (Fragment)	IAVAAQNCYK	10	99
35	trm|Q6FHP9|Q6FHP9_HUMAN	Triosephosphate isomerase (EC 5.3.1.1) (TIM) (Triose-phosphate isomerase) (Fragment)	IIYGGSVTGATCK	21	99
35	trm|Q6FHP9|Q6FHP9_HUMAN	Triosephosphate isomerase (EC 5.3.1.1) (TIM) (Triose-phosphate isomerase) (Fragment)	KFFVGGNWK	6	99
35	trm|Q6FHP9|Q6FHP9_HUMAN	Triosephosphate isomerase (EC 5.3.1.1) (TIM) (Triose-phosphate isomerase) (Fragment)	KQSLGELIGTLNAAK	10	99
35	trm|Q6FHP9|Q6FHP9_HUMAN	Triosephosphate isomerase (EC 5.3.1.1) (TIM) (Triose-phosphate isomerase) (Fragment)	LDEREAGITEK	3	99
35	trm|Q6FHP9|Q6FHP9_HUMAN	Triosephosphate isomerase (EC 5.3.1.1) (TIM) (Triose-phosphate isomerase) (Fragment)	PPTAYIDFAR	2	99
35	trm|Q6FHP9|Q6FHP9_HUMAN	Triosephosphate isomerase (EC 5.3.1.1) (TIM) (Triose-phosphate isomerase) (Fragment)	QSLGELIGTLNAAK	21	99
35	trm|Q6FHP9|Q6FHP9_HUMAN	Triosephosphate isomerase (EC 5.3.1.1) (TIM) (Triose-phosphate isomerase) (Fragment)	SNVSDAVAQSTR	19	99
35	trm|Q6FHP9|Q6FHP9_HUMAN	Triosephosphate isomerase (EC 5.3.1.1) (TIM) (Triose-phosphate isomerase) (Fragment)	TATPQQAQEVHEK	16	99
35	trm|Q6FHP9|Q6FHP9_HUMAN	Triosephosphate isomerase (EC 5.3.1.1) (TIM) (Triose-phosphate isomerase) (Fragment)	VIADNVKDW	2	99
35	trm|Q6FHP9|Q6FHP9_HUMAN	Triosephosphate isomerase (EC 5.3.1.1) (TIM) (Triose-phosphate isomerase) (Fragment)	VIADNVKDWSK	8	99
35	trm|Q6FHP9|Q6FHP9_HUMAN	Triosephosphate isomerase (EC 5.3.1.1) (TIM) (Triose-phosphate isomerase) (Fragment)	VPADTEVVCAPPTAYIDFAR	16	99
35	trm|Q6FHP9|Q6FHP9_HUMAN	Triosephosphate isomerase (EC 5.3.1.1) (TIM) (Triose-phosphate isomerase) (Fragment)	VTNGAFTGEISPGMIK	18	99
35	trm|Q6FHP9|Q6FHP9_HUMAN	Triosephosphate isomerase (EC 5.3.1.1) (TIM) (Triose-phosphate isomerase) (Fragment)	VVLAYEPVWAIGTGK	16	99
36	trm|Q5J7W1|Q5J7W1_HUMAN	Phosphoglycerate kinase (EC 2.7.2.3)	ACANPAAGSVILLENLR	17	99
36	trm|Q5J7W1|Q5J7W1_HUMAN	Phosphoglycerate kinase (EC 2.7.2.3)	AEPAKIEAFR	12	99
36	trm|Q5J7W1|Q5J7W1_HUMAN	Phosphoglycerate kinase (EC 2.7.2.3)	AHSSMVGVNLPQK	15	99
36	trm|Q5J7W1|Q5J7W1_HUMAN	Phosphoglycerate kinase (EC 2.7.2.3)	ALESPERPFLAILGGAK	12	99
36	trm|Q5J7W1|Q5J7W1_HUMAN	Phosphoglycerate kinase (EC 2.7.2.3)	ALMDEVVK	12	99
36	trm|Q5J7W1|Q5J7W1_HUMAN	Phosphoglycerate kinase (EC 2.7.2.3)	DCVGPEVEK	7	99
36	trm|Q5J7W1|Q5J7W1_HUMAN	Phosphoglycerate kinase (EC 2.7.2.3)	FCLDNGAK	9	99
36	trm|Q5J7W1|Q5J7W1_HUMAN	Phosphoglycerate kinase (EC 2.7.2.3)	GCITIIGGGDTATCCAK	4	99
36	trm|Q5J7W1|Q5J7W1_HUMAN	Phosphoglycerate kinase (EC 2.7.2.3)	ITLPVDFVTADK	14	99
36	trm|Q5J7W1|Q5J7W1_HUMAN	Phosphoglycerate kinase (EC 2.7.2.3)	ITLPVDFVTADKFDENAK	11	99
36	trm|Q5J7W1|Q5J7W1_HUMAN	Phosphoglycerate kinase (EC 2.7.2.3)	KYAEAVTR	5	99
36	trm|Q5J7W1|Q5J7W1_HUMAN	Phosphoglycerate kinase (EC 2.7.2.3)	LGDVYVNDAFGTAHR	18	99
36	trm|Q5J7W1|Q5J7W1_HUMAN	Phosphoglycerate kinase (EC 2.7.2.3)	LTLDKLDVK	13	99
36	trm|Q5J7W1|Q5J7W1_HUMAN	Phosphoglycerate kinase (EC 2.7.2.3)	SLLGKDVLFLK	4	99
36	trm|Q5J7W1|Q5J7W1_HUMAN	Phosphoglycerate kinase (EC 2.7.2.3)	SLSNKLTLDKLDVK	5	99
36	trm|Q5J7W1|Q5J7W1_HUMAN	Phosphoglycerate kinase (EC 2.7.2.3)	TGQATVASGIPAGWMGLDCGPESSK	8	99
36	trm|Q5J7W1|Q5J7W1_HUMAN	Phosphoglycerate kinase (EC 2.7.2.3)	VDFNVPMK	11	99
36	trm|Q5J7W1|Q5J7W1_HUMAN	Phosphoglycerate kinase (EC 2.7.2.3)	VDFNVPMKNNQITNNQR	13	99
36	trm|Q5J7W1|Q5J7W1_HUMAN	Phosphoglycerate kinase (EC 2.7.2.3)	VLNNMEIGTSLFDEEGAK	7	99
36	trm|Q5J7W1|Q5J7W1_HUMAN	Phosphoglycerate kinase (EC 2.7.2.3)	VLPGVDALSNI	20	99
36	trm|Q5J7W1|Q5J7W1_HUMAN	Phosphoglycerate kinase (EC 2.7.2.3)	VSHVSTGGGASLELLEGK	10	99
37	spt|P63104|1433Z_HUMAN	14-3-3 protein zeta/delta (Protein kinase C inhibitor protein 1) (KCIP-1)	DICNDVLSLLEK	6	99
37	spt|P63104|1433Z_HUMAN	14-3-3 protein zeta/delta (Protein kinase C inhibitor protein 1) (KCIP-1)	DNLTLWTSDTQGDEAEAGEGGEN	7	99
37	spt|P63104|1433Z_HUMAN	14-3-3 protein zeta/delta (Protein kinase C inhibitor protein 1) (KCIP-1)	DSTLIMQLLR	11	99
37	spt|P63104|1433Z_HUMAN	14-3-3 protein zeta/delta (Protein kinase C inhibitor protein 1) (KCIP-1)	EMQPTHPIR	9	99
37	spt|P63104|1433Z_HUMAN	14-3-3 protein zeta/delta (Protein kinase C inhibitor protein 1) (KCIP-1)	GIVDQSQQAYQEAFEISK	14	99
37	spt|P63104|1433Z_HUMAN	14-3-3 protein zeta/delta (Protein kinase C inhibitor protein 1) (KCIP-1)	GIVDQSQQAYQEAFEISKK	6	99
37	spt|P63104|1433Z_HUMAN	14-3-3 protein zeta/delta (Protein kinase C inhibitor protein 1) (KCIP-1)	MDKNELVQK	10	99
37	spt|P63104|1433Z_HUMAN	14-3-3 protein zeta/delta (Protein kinase C inhibitor protein 1) (KCIP-1)	NLLSVAYK	19	99
37	spt|P63104|1433Z_HUMAN	14-3-3 protein zeta/delta (Protein kinase C inhibitor protein 1) (KCIP-1)	NLLSVAYKNVVGAR	6	99
37	spt|P63104|1433Z_HUMAN	14-3-3 protein zeta/delta (Protein kinase C inhibitor protein 1) (KCIP-1)	SVTEQGAELSNEER	18	99
37	spt|P63104|1433Z_HUMAN	14-3-3 protein zeta/delta (Protein kinase C inhibitor protein 1) (KCIP-1)	TAFDEAIAELDTLSEESYK	7	99
37	spt|P63104|1433Z_HUMAN	14-3-3 protein zeta/delta (Protein kinase C inhibitor protein 1) (KCIP-1)	VVSSIEQK	11	99
37	spt|P63104|1433Z_HUMAN	14-3-3 protein zeta/delta (Protein kinase C inhibitor protein 1) (KCIP-1)	VVSSIEQKTEGAEK	5	99
37	spt|P63104|1433Z_HUMAN	14-3-3 protein zeta/delta (Protein kinase C inhibitor protein 1) (KCIP-1)	YDDMAACMK	2	99
37	spt|P63104|1433Z_HUMAN	14-3-3 protein zeta/delta (Protein kinase C inhibitor protein 1) (KCIP-1)	YLAEVAAGDDK	5	99
37	spt|P63104|1433Z_HUMAN	14-3-3 protein zeta/delta (Protein kinase C inhibitor protein 1) (KCIP-1)	YLAEVAAGDDKK	10	99
38	trm|Q8WUK1|Q8WUK1_HUMAN	IGHM protein	DGFFGNPR	8	99
38	trm|Q8WUK1|Q8WUK1_HUMAN	IGHM protein	EVQLLESGGGLVQPGGSLR	4	99
38	trm|Q8WUK1|Q8WUK1_HUMAN	IGHM protein	FTCTVTHTDLPSPLK	5	99
38	trm|Q8WUK1|Q8WUK1_HUMAN	IGHM protein	LICQATGFSPR	5	99
38	trm|Q8WUK1|Q8WUK1_HUMAN	IGHM protein	NVPLPVIAELPPK	6	99
38	trm|Q8WUK1|Q8WUK1_HUMAN	IGHM protein	QVGSGVTTDQVQAEAK	8	99
38	trm|Q8WUK1|Q8WUK1_HUMAN	IGHM protein	QVQLVESGGGVVQPGR	9	99
38	trm|Q8WUK1|Q8WUK1_HUMAN	IGHM protein	VFAIPPSFASIFLTK	3	99
38	trm|Q8WUK1|Q8WUK1_HUMAN	IGHM protein	VSVFVPPR	7	99
38	trm|Q8WUK1|Q8WUK1_HUMAN	IGHM protein	YVTSAPMPEPQAPGR	8	99
39	spt|P22626|ROA2_HUMAN	Heterogeneous nuclear ribonucleoproteins A2/B1 (hnRNP A2 / hnRNP B1)	DYFEEYGK	6	99
39	spt|P22626|ROA2_HUMAN	Heterogeneous nuclear ribonucleoproteins A2/B1 (hnRNP A2 / hnRNP B1)	EDTEEHHLR	2	99
39	spt|P22626|ROA2_HUMAN	Heterogeneous nuclear ribonucleoproteins A2/B1 (hnRNP A2 / hnRNP B1)	EESGKPGAHVTVK	6	99
39	spt|P22626|ROA2_HUMAN	Heterogeneous nuclear ribonucleoproteins A2/B1 (hnRNP A2 / hnRNP B1)	GFGFVTFDDHDPVDK	6	99
39	spt|P22626|ROA2_HUMAN	Heterogeneous nuclear ribonucleoproteins A2/B1 (hnRNP A2 / hnRNP B1)	GGGGNFGPGPGSN	2	99
39	spt|P22626|ROA2_HUMAN	Heterogeneous nuclear ribonucleoproteins A2/B1 (hnRNP A2 / hnRNP B1)	GGGGNFGPGPGSNFR	7	99
39	spt|P22626|ROA2_HUMAN	Heterogeneous nuclear ribonucleoproteins A2/B1 (hnRNP A2 / hnRNP B1)	GGNFGFGDSR	14	99
39	spt|P22626|ROA2_HUMAN	Heterogeneous nuclear ribonucleoproteins A2/B1 (hnRNP A2 / hnRNP B1)	GGSGGSGGYGGR	1	99
39	spt|P22626|ROA2_HUMAN	Heterogeneous nuclear ribonucleoproteins A2/B1 (hnRNP A2 / hnRNP B1)	GSGGSGGYGGR	1	99
39	spt|P22626|ROA2_HUMAN	Heterogeneous nuclear ribonucleoproteins A2/B1 (hnRNP A2 / hnRNP B1)	IDTIEIITDR	10	99
39	spt|P22626|ROA2_HUMAN	Heterogeneous nuclear ribonucleoproteins A2/B1 (hnRNP A2 / hnRNP B1)	KLFIGGLSFETTEESLR	2	99
39	spt|P22626|ROA2_HUMAN	Heterogeneous nuclear ribonucleoproteins A2/B1 (hnRNP A2 / hnRNP B1)	LTDCVVMR	8	99
39	spt|P22626|ROA2_HUMAN	Heterogeneous nuclear ribonucleoproteins A2/B1 (hnRNP A2 / hnRNP B1)	NQQPSNYGPMK	2	99
39	spt|P22626|ROA2_HUMAN	Heterogeneous nuclear ribonucleoproteins A2/B1 (hnRNP A2 / hnRNP B1)	TLETVPLER	9	99
39	spt|P22626|ROA2_HUMAN	Heterogeneous nuclear ribonucleoproteins A2/B1 (hnRNP A2 / hnRNP B1)	YHTINGHNAEVR	6	99
40	trm|Q6IBN1|Q6IBN1_HUMAN	HNRPK protein (Heterogeneous nuclear ribonucleoprotein K)	ALRTDYNASVSVPDSSGPER	7	99
40	trm|Q6IBN1|Q6IBN1_HUMAN	HNRPK protein (Heterogeneous nuclear ribonucleoprotein K)	DLAGSIIGK	15	99
40	trm|Q6IBN1|Q6IBN1_HUMAN	HNRPK protein (Heterogeneous nuclear ribonucleoprotein K)	DYDDMSPR	6	99
40	trm|Q6IBN1|Q6IBN1_HUMAN	HNRPK protein (Heterogeneous nuclear ribonucleoprotein K)	GGDLMAYDR	13	99
40	trm|Q6IBN1|Q6IBN1_HUMAN	HNRPK protein (Heterogeneous nuclear ribonucleoprotein K)	GSDFDCELR	9	99
40	trm|Q6IBN1|Q6IBN1_HUMAN	HNRPK protein (Heterogeneous nuclear ribonucleoprotein K)	GSYGDLGGPIITTQVTIPK	11	99
40	trm|Q6IBN1|Q6IBN1_HUMAN	HNRPK protein (Heterogeneous nuclear ribonucleoprotein K)	IDEPLEGSEDR	10	99
40	trm|Q6IBN1|Q6IBN1_HUMAN	HNRPK protein (Heterogeneous nuclear ribonucleoprotein K)	IILDLISESPIK	2	99
40	trm|Q6IBN1|Q6IBN1_HUMAN	HNRPK protein (Heterogeneous nuclear ribonucleoprotein K)	IITITGTQDQIQNAQYLLQNSVK	16	99
40	trm|Q6IBN1|Q6IBN1_HUMAN	HNRPK protein (Heterogeneous nuclear ribonucleoprotein K)	LFQECCPHSTDR	3	99
40	trm|Q6IBN1|Q6IBN1_HUMAN	HNRPK protein (Heterogeneous nuclear ribonucleoprotein K)	NAGAVIGK	9	99
40	trm|Q6IBN1|Q6IBN1_HUMAN	HNRPK protein (Heterogeneous nuclear ribonucleoprotein K)	NLPLPPPPPPR	18	99
40	trm|Q6IBN1|Q6IBN1_HUMAN	HNRPK protein (Heterogeneous nuclear ribonucleoprotein K)	NTDEMVELR	13	99
40	trm|Q6IBN1|Q6IBN1_HUMAN	HNRPK protein (Heterogeneous nuclear ribonucleoprotein K)	SADETWDSAIDTWSPSEWQMAYEPQGGSGYDYSYAGGR	1	99
40	trm|Q6IBN1|Q6IBN1_HUMAN	HNRPK protein (Heterogeneous nuclear ribonucleoprotein K)	TDYNASVSVPDSSGPER	14	99
41	trm|Q6FGI1|Q6FGI1_HUMAN	TAGLN2 protein (Transgelin 2)	ANRGPAYGLSR	10	99
41	trm|Q6FGI1|Q6FGI1_HUMAN	TAGLN2 protein (Transgelin 2)	DDGLFSGDPNWFPK	10	99
41	trm|Q6FGI1|Q6FGI1_HUMAN	TAGLN2 protein (Transgelin 2)	GASQAGMTGYGMPR	11	99
41	trm|Q6FGI1|Q6FGI1_HUMAN	TAGLN2 protein (Transgelin 2)	GPAYGLSR	9	99
41	trm|Q6FGI1|Q6FGI1_HUMAN	TAGLN2 protein (Transgelin 2)	IQASTMAFK	6	99
41	trm|Q6FGI1|Q6FGI1_HUMAN	TAGLN2 protein (Transgelin 2)	KIQASTMAFK	2	99
41	trm|Q6FGI1|Q6FGI1_HUMAN	TAGLN2 protein (Transgelin 2)	NFSDNQLQEGK	16	99
41	trm|Q6FGI1|Q6FGI1_HUMAN	TAGLN2 protein (Transgelin 2)	NVIGLQMGTN	7	99
41	trm|Q6FGI1|Q6FGI1_HUMAN	TAGLN2 protein (Transgelin 2)	NVIGLQMGTNR	13	99
41	trm|Q6FGI1|Q6FGI1_HUMAN	TAGLN2 protein (Transgelin 2)	QMEQISQFLQAAER	10	99
41	trm|Q6FGI1|Q6FGI1_HUMAN	TAGLN2 protein (Transgelin 2)	TLMNLGGLAVAR	19	99
41	trm|Q6FGI1|Q6FGI1_HUMAN	TAGLN2 protein (Transgelin 2)	YGINTTDIFQTVDLWEGK	10	99
42	trm|Q6FHB3|Q6FHB3_HUMAN	ANXA5 protein (Hypothetical protein ANXA5) (Fragment)	ALLLLCGEDD	16	99
42	trm|Q6FHB3|Q6FHB3_HUMAN	ANXA5 protein (Hypothetical protein ANXA5) (Fragment)	DLLDDLKSELTGK	1	99
42	trm|Q6FHB3|Q6FHB3_HUMAN	ANXA5 protein (Hypothetical protein ANXA5) (Fragment)	DPDAGIDEAQVEQDAQALFQAGELK	9	99
42	trm|Q6FHB3|Q6FHB3_HUMAN	ANXA5 protein (Hypothetical protein ANXA5) (Fragment)	ETSGNLEQLLLAVVK	5	99
42	trm|Q6FHB3|Q6FHB3_HUMAN	ANXA5 protein (Hypothetical protein ANXA5) (Fragment)	FITIFGTR	12	99
42	trm|Q6FHB3|Q6FHB3_HUMAN	ANXA5 protein (Hypothetical protein ANXA5) (Fragment)	GAGTDDHTLIR	6	99
42	trm|Q6FHB3|Q6FHB3_HUMAN	ANXA5 protein (Hypothetical protein ANXA5) (Fragment)	GLGTDEESILTLLTSR	16	99
42	trm|Q6FHB3|Q6FHB3_HUMAN	ANXA5 protein (Hypothetical protein ANXA5) (Fragment)	GTVTDFPGFDER	18	99
42	trm|Q6FHB3|Q6FHB3_HUMAN	ANXA5 protein (Hypothetical protein ANXA5) (Fragment)	GTVTDFPGFDERADAETLR	9	99
42	trm|Q6FHB3|Q6FHB3_HUMAN	ANXA5 protein (Hypothetical protein ANXA5) (Fragment)	GTVTDFPGFDERADAETLRK	6	99
42	trm|Q6FHB3|Q6FHB3_HUMAN	ANXA5 protein (Hypothetical protein ANXA5) (Fragment)	KNFATSLYSMIK	2	99
42	trm|Q6FHB3|Q6FHB3_HUMAN	ANXA5 protein (Hypothetical protein ANXA5) (Fragment)	LIVALMKPSR	5	99
42	trm|Q6FHB3|Q6FHB3_HUMAN	ANXA5 protein (Hypothetical protein ANXA5) (Fragment)	LYDAYELK	10	99
42	trm|Q6FHB3|Q6FHB3_HUMAN	ANXA5 protein (Hypothetical protein ANXA5) (Fragment)	NFATSLYSMIK	7	99
42	trm|Q6FHB3|Q6FHB3_HUMAN	ANXA5 protein (Hypothetical protein ANXA5) (Fragment)	QEISAAFK	13	99
42	trm|Q6FHB3|Q6FHB3_HUMAN	ANXA5 protein (Hypothetical protein ANXA5) (Fragment)	QVYEEEYGSSLEDDVVGDTSGYYQR	10	99
42	trm|Q6FHB3|Q6FHB3_HUMAN	ANXA5 protein (Hypothetical protein ANXA5) (Fragment)	SEIDLFNIR	14	99
42	trm|Q6FHB3|Q6FHB3_HUMAN	ANXA5 protein (Hypothetical protein ANXA5) (Fragment)	SIPAYLAETLYYAMK	4	99
42	trm|Q6FHB3|Q6FHB3_HUMAN	ANXA5 protein (Hypothetical protein ANXA5) (Fragment)	VLTEIIASR	21	99
43	trm|Q8N1C8|Q8N1C8_HUMAN	Heat shock 70kD protein 9B (Mortalin-2) (Fragment)	AQFEGIVTDLIR	7	99
43	trm|Q8N1C8|Q8N1C8_HUMAN	Heat shock 70kD protein 9B (Mortalin-2) (Fragment)	DAGQISGLNVLR	8	99
43	trm|Q8N1C8|Q8N1C8_HUMAN	Heat shock 70kD protein 9B (Mortalin-2) (Fragment)	LLGQFTLIGIPPAPR	7	99
43	trm|Q8N1C8|Q8N1C8_HUMAN	Heat shock 70kD protein 9B (Mortalin-2) (Fragment)	LYSPSQIGAFVLMK	3	99
43	trm|Q8N1C8|Q8N1C8_HUMAN	Heat shock 70kD protein 9B (Mortalin-2) (Fragment)	NAVITVPAYFNDSQR	5	99
43	trm|Q8N1C8|Q8N1C8_HUMAN	Heat shock 70kD protein 9B (Mortalin-2) (Fragment)	QAASSLQQASLK	4	99
43	trm|Q8N1C8|Q8N1C8_HUMAN	Heat shock 70kD protein 9B (Mortalin-2) (Fragment)	QAVTNPNNTFYATK	8	99
43	trm|Q8N1C8|Q8N1C8_HUMAN	Heat shock 70kD protein 9B (Mortalin-2) (Fragment)	STNGDTFLGGEDFDQALLR	10	99
43	trm|Q8N1C8|Q8N1C8_HUMAN	Heat shock 70kD protein 9B (Mortalin-2) (Fragment)	TTPSVVAFTADGER	11	99
43	trm|Q8N1C8|Q8N1C8_HUMAN	Heat shock 70kD protein 9B (Mortalin-2) (Fragment)	VEAVNMAEGIIHDTETK	5	99
43	trm|Q8N1C8|Q8N1C8_HUMAN	Heat shock 70kD protein 9B (Mortalin-2) (Fragment)	VINEPTAAALAYGLDK	11	99
43	trm|Q8N1C8|Q8N1C8_HUMAN	Heat shock 70kD protein 9B (Mortalin-2) (Fragment)	VLENAEGAR	8	99
43	trm|Q8N1C8|Q8N1C8_HUMAN	Heat shock 70kD protein 9B (Mortalin-2) (Fragment)	VQQTVQDLFGR	9	99
44	spt|P06576|ATPB_HUMAN	"ATP synthase subunit beta, mitochondrial precursor (EC 3.6.3.14) "	AHGGYSVFAGVGER	5	99
44	spt|P06576|ATPB_HUMAN	"ATP synthase subunit beta, mitochondrial precursor (EC 3.6.3.14) "	AIAELGIYPAVD	2	99
44	spt|P06576|ATPB_HUMAN	"ATP synthase subunit beta, mitochondrial precursor (EC 3.6.3.14) "	AIAELGIYPAVDPLDSTSR	18	99
44	spt|P06576|ATPB_HUMAN	"ATP synthase subunit beta, mitochondrial precursor (EC 3.6.3.14) "	FLSQPFQVAEVFTGHMGK	7	99
44	spt|P06576|ATPB_HUMAN	"ATP synthase subunit beta, mitochondrial precursor (EC 3.6.3.14) "	FTQAGSEVSALLGR	11	99
44	spt|P06576|ATPB_HUMAN	"ATP synthase subunit beta, mitochondrial precursor (EC 3.6.3.14) "	IGLFGGAGVGK	8	99
44	spt|P06576|ATPB_HUMAN	"ATP synthase subunit beta, mitochondrial precursor (EC 3.6.3.14) "	IMDPNIVGSEHYDVAR	12	99
44	spt|P06576|ATPB_HUMAN	"ATP synthase subunit beta, mitochondrial precursor (EC 3.6.3.14) "	IMNVIGEPIDER	18	99
44	spt|P06576|ATPB_HUMAN	"ATP synthase subunit beta, mitochondrial precursor (EC 3.6.3.14) "	IPSAVGYQPTLATDMGTMQER	9	99
44	spt|P06576|ATPB_HUMAN	"ATP synthase subunit beta, mitochondrial precursor (EC 3.6.3.14) "	IPVGPETLGR	8	99
44	spt|P06576|ATPB_HUMAN	"ATP synthase subunit beta, mitochondrial precursor (EC 3.6.3.14) "	LVLEVAQHLGESTVR	10	99
44	spt|P06576|ATPB_HUMAN	"ATP synthase subunit beta, mitochondrial precursor (EC 3.6.3.14) "	LVPLKETIK	3	99
44	spt|P06576|ATPB_HUMAN	"ATP synthase subunit beta, mitochondrial precursor (EC 3.6.3.14) "	PAVDPLDSTSR	3	99
44	spt|P06576|ATPB_HUMAN	"ATP synthase subunit beta, mitochondrial precursor (EC 3.6.3.14) "	TIAMDGTEGLVR	15	99
44	spt|P06576|ATPB_HUMAN	"ATP synthase subunit beta, mitochondrial precursor (EC 3.6.3.14) "	TVLIMELINNVAK	7	99
44	spt|P06576|ATPB_HUMAN	"ATP synthase subunit beta, mitochondrial precursor (EC 3.6.3.14) "	VALVYGQMNEPPGAR	17	99
44	spt|P06576|ATPB_HUMAN	"ATP synthase subunit beta, mitochondrial precursor (EC 3.6.3.14) "	VLDSGAPIKIPVGPETLGR	14	99
44	spt|P06576|ATPB_HUMAN	"ATP synthase subunit beta, mitochondrial precursor (EC 3.6.3.14) "	VVDLLAPYAK	9	99
45	trm|Q6N090|Q6N090_HUMAN	Hypothetical protein DKFZp686G21220 (Fragment)	DASGVTFTWTPSSGK	1	99
45	trm|Q6N090|Q6N090_HUMAN	Hypothetical protein DKFZp686G21220 (Fragment)	NFPPSQDASGDLYTTSSQLTLPATQCLAGK	2	99
45	trm|Q6N090|Q6N090_HUMAN	Hypothetical protein DKFZp686G21220 (Fragment)	QEPSQGTTTFAVTSILR	2	99
45	trm|Q6N090|Q6N090_HUMAN	Hypothetical protein DKFZp686G21220 (Fragment)	SAVQGPPER	2	99
45	trm|Q6N090|Q6N090_HUMAN	Hypothetical protein DKFZp686G21220 (Fragment)	TFTCTAAYPESK	1	99
45	trm|Q6N090|Q6N090_HUMAN	Hypothetical protein DKFZp686G21220 (Fragment)	TPLTATLSK	2	99
45	trm|Q6N090|Q6N090_HUMAN	Hypothetical protein DKFZp686G21220 (Fragment)	WLQGSQELPR	2	99
46	spt|Q96KP4|CNDP2_HUMAN	Cytosolic nonspecific dipeptidase (Glutamate carboxypeptidase-like protein 1) (CNDP dipeptidase 2)	DVDYVCISDNYWLGK	2	99
46	spt|Q96KP4|CNDP2_HUMAN	Cytosolic nonspecific dipeptidase (Glutamate carboxypeptidase-like protein 1) (CNDP dipeptidase 2)	EGGSIPVTLTFQEATGK	17	99
46	spt|Q96KP4|CNDP2_HUMAN	Cytosolic nonspecific dipeptidase (Glutamate carboxypeptidase-like protein 1) (CNDP dipeptidase 2)	GNILIPGINEAVAAVTEEEHK	8	99
46	spt|Q96KP4|CNDP2_HUMAN	Cytosolic nonspecific dipeptidase (Glutamate carboxypeptidase-like protein 1) (CNDP dipeptidase 2)	GSTDDKGPVAGWINALEAYQK	8	99
46	spt|Q96KP4|CNDP2_HUMAN	Cytosolic nonspecific dipeptidase (Glutamate carboxypeptidase-like protein 1) (CNDP dipeptidase 2)	LGSDPQKK	5	99
46	spt|Q96KP4|CNDP2_HUMAN	Cytosolic nonspecific dipeptidase (Glutamate carboxypeptidase-like protein 1) (CNDP dipeptidase 2)	LPDGSEIPLPPILLGR	9	99
46	spt|Q96KP4|CNDP2_HUMAN	Cytosolic nonspecific dipeptidase (Glutamate carboxypeptidase-like protein 1) (CNDP dipeptidase 2)	LVPNMTPEVVGEQVTSYLTK	12	99
46	spt|Q96KP4|CNDP2_HUMAN	Cytosolic nonspecific dipeptidase (Glutamate carboxypeptidase-like protein 1) (CNDP dipeptidase 2)	LYDDIDFDIEEFAK	3	99
46	spt|Q96KP4|CNDP2_HUMAN	Cytosolic nonspecific dipeptidase (Glutamate carboxypeptidase-like protein 1) (CNDP dipeptidase 2)	MLAAYLYEVSQLKD	2	99
46	spt|Q96KP4|CNDP2_HUMAN	Cytosolic nonspecific dipeptidase (Glutamate carboxypeptidase-like protein 1) (CNDP dipeptidase 2)	MMEVAAADVK	2	99
46	spt|Q96KP4|CNDP2_HUMAN	Cytosolic nonspecific dipeptidase (Glutamate carboxypeptidase-like protein 1) (CNDP dipeptidase 2)	NVMLLPVGSADDGAHSQNEK	8	99
46	spt|Q96KP4|CNDP2_HUMAN	Cytosolic nonspecific dipeptidase (Glutamate carboxypeptidase-like protein 1) (CNDP dipeptidase 2)	QKLPDGSEIPLPPILLGR	11	99
46	spt|Q96KP4|CNDP2_HUMAN	Cytosolic nonspecific dipeptidase (Glutamate carboxypeptidase-like protein 1) (CNDP dipeptidase 2)	QLGGSVELVDIGK	17	99
46	spt|Q96KP4|CNDP2_HUMAN	Cytosolic nonspecific dipeptidase (Glutamate carboxypeptidase-like protein 1) (CNDP dipeptidase 2)	TGQEIPVNVR	14	99
46	spt|Q96KP4|CNDP2_HUMAN	Cytosolic nonspecific dipeptidase (Glutamate carboxypeptidase-like protein 1) (CNDP dipeptidase 2)	TVFGVEPDLTR	17	99
46	spt|Q96KP4|CNDP2_HUMAN	Cytosolic nonspecific dipeptidase (Glutamate carboxypeptidase-like protein 1) (CNDP dipeptidase 2)	WVAIQSVSAWPEKR	2	99
46	spt|Q96KP4|CNDP2_HUMAN	Cytosolic nonspecific dipeptidase (Glutamate carboxypeptidase-like protein 1) (CNDP dipeptidase 2)	YIDENQDR	5	99
47	spt|O43707|ACTN4_HUMAN	Alpha-actinin-4 (Non-muscle alpha-actinin 4) (F-actin cross-linking protein)	AGTQIENIDEDFR	6	99
47	spt|O43707|ACTN4_HUMAN	Alpha-actinin-4 (Non-muscle alpha-actinin 4) (F-actin cross-linking protein)	AGTQIENIDEDFRDGLK	7	99
47	spt|O43707|ACTN4_HUMAN	Alpha-actinin-4 (Non-muscle alpha-actinin 4) (F-actin cross-linking protein)	ALDFIASK	10	99
47	spt|O43707|ACTN4_HUMAN	Alpha-actinin-4 (Non-muscle alpha-actinin 4) (F-actin cross-linking protein)	CQLEINFNTLQTK	5	99
47	spt|O43707|ACTN4_HUMAN	Alpha-actinin-4 (Non-muscle alpha-actinin 4) (F-actin cross-linking protein)	DGLAFNALIHR	3	99
47	spt|O43707|ACTN4_HUMAN	Alpha-actinin-4 (Non-muscle alpha-actinin 4) (F-actin cross-linking protein)	EAILAIHK	2	99
47	spt|O43707|ACTN4_HUMAN	Alpha-actinin-4 (Non-muscle alpha-actinin 4) (F-actin cross-linking protein)	EGLLLWCQR	5	99
47	spt|O43707|ACTN4_HUMAN	Alpha-actinin-4 (Non-muscle alpha-actinin 4) (F-actin cross-linking protein)	ELPPDQAEYCIAR	13	99
47	spt|O43707|ACTN4_HUMAN	Alpha-actinin-4 (Non-muscle alpha-actinin 4) (F-actin cross-linking protein)	ETTDTDTADQVIASFK	8	99
47	spt|O43707|ACTN4_HUMAN	Alpha-actinin-4 (Non-muscle alpha-actinin 4) (F-actin cross-linking protein)	FAIQDISVEETSAK	3	99
47	spt|O43707|ACTN4_HUMAN	Alpha-actinin-4 (Non-muscle alpha-actinin 4) (F-actin cross-linking protein)	GISQEQMQEFR	8	99
47	spt|O43707|ACTN4_HUMAN	Alpha-actinin-4 (Non-muscle alpha-actinin 4) (F-actin cross-linking protein)	GYEEWLLNEIR	4	99
47	spt|O43707|ACTN4_HUMAN	Alpha-actinin-4 (Non-muscle alpha-actinin 4) (F-actin cross-linking protein)	ICDQWDALGSLTHSR	4	99
47	spt|O43707|ACTN4_HUMAN	Alpha-actinin-4 (Non-muscle alpha-actinin 4) (F-actin cross-linking protein)	ISIEMNGTLEDQLSHLK	9	99
47	spt|O43707|ACTN4_HUMAN	Alpha-actinin-4 (Non-muscle alpha-actinin 4) (F-actin cross-linking protein)	KDDPVTNLNNAFEVAEK	7	99
47	spt|O43707|ACTN4_HUMAN	Alpha-actinin-4 (Non-muscle alpha-actinin 4) (F-actin cross-linking protein)	LMLLLEVISGER	2	99
47	spt|O43707|ACTN4_HUMAN	Alpha-actinin-4 (Non-muscle alpha-actinin 4) (F-actin cross-linking protein)	LSGSNPYTTVTPQIINSK	9	99
47	spt|O43707|ACTN4_HUMAN	Alpha-actinin-4 (Non-muscle alpha-actinin 4) (F-actin cross-linking protein)	LSNRPAFMPSEGK	9	99
47	spt|O43707|ACTN4_HUMAN	Alpha-actinin-4 (Non-muscle alpha-actinin 4) (F-actin cross-linking protein)	MAPYQGPDAVPGALDYK	6	99
47	spt|O43707|ACTN4_HUMAN	Alpha-actinin-4 (Non-muscle alpha-actinin 4) (F-actin cross-linking protein)	MLDAEDIVNTARPDEK	8	99
47	spt|O43707|ACTN4_HUMAN	Alpha-actinin-4 (Non-muscle alpha-actinin 4) (F-actin cross-linking protein)	QFASQANVVGPWIQTK	9	99
47	spt|O43707|ACTN4_HUMAN	Alpha-actinin-4 (Non-muscle alpha-actinin 4) (F-actin cross-linking protein)	QLEAIDQLHLEYAK	6	99
47	spt|O43707|ACTN4_HUMAN	Alpha-actinin-4 (Non-muscle alpha-actinin 4) (F-actin cross-linking protein)	RDHALLEEQSK	6	99
47	spt|O43707|ACTN4_HUMAN	Alpha-actinin-4 (Non-muscle alpha-actinin 4) (F-actin cross-linking protein)	RELPPDQAEYCIAR	2	99
47	spt|O43707|ACTN4_HUMAN	Alpha-actinin-4 (Non-muscle alpha-actinin 4) (F-actin cross-linking protein)	SFSTALYGESDL	13	99
47	spt|O43707|ACTN4_HUMAN	Alpha-actinin-4 (Non-muscle alpha-actinin 4) (F-actin cross-linking protein)	STLPDADRER	5	99
47	spt|O43707|ACTN4_HUMAN	Alpha-actinin-4 (Non-muscle alpha-actinin 4) (F-actin cross-linking protein)	TINEVENQILTR	11	99
47	spt|O43707|ACTN4_HUMAN	Alpha-actinin-4 (Non-muscle alpha-actinin 4) (F-actin cross-linking protein)	VGWEQLLTTIAR	11	99
47	spt|O43707|ACTN4_HUMAN	Alpha-actinin-4 (Non-muscle alpha-actinin 4) (F-actin cross-linking protein)	VLAGDKNFITAEELR	6	99
48	trm|Q5TZY3|Q5TZY3_HUMAN	Glutathione S-transferase pi (GSTP1 protein)	AFLASPEYVNLPINGNGKQ	17	99
48	trm|Q5TZY3|Q5TZY3_HUMAN	Glutathione S-transferase pi (GSTP1 protein)	ALPGQLKPFETLLSQNQGGK	14	99
48	trm|Q5TZY3|Q5TZY3_HUMAN	Glutathione S-transferase pi (GSTP1 protein)	ASCLYGQLPK	14	99
48	trm|Q5TZY3|Q5TZY3_HUMAN	Glutathione S-transferase pi (GSTP1 protein)	DQQEAALVDMVNDGVEDLR	9	99
48	trm|Q5TZY3|Q5TZY3_HUMAN	Glutathione S-transferase pi (GSTP1 protein)	FQDGDLTLYQSNTILR	17	99
48	trm|Q5TZY3|Q5TZY3_HUMAN	Glutathione S-transferase pi (GSTP1 protein)	LKAFLASPEYVNLPINGNGKQ	3	99
48	trm|Q5TZY3|Q5TZY3_HUMAN	Glutathione S-transferase pi (GSTP1 protein)	MPPYTVVYFPVR	3	99
48	trm|Q5TZY3|Q5TZY3_HUMAN	Glutathione S-transferase pi (GSTP1 protein)	PPYTVVYFPVR	18	99
48	trm|Q5TZY3|Q5TZY3_HUMAN	Glutathione S-transferase pi (GSTP1 protein)	PPYTVVYFPVRGR	6	99
48	trm|Q5TZY3|Q5TZY3_HUMAN	Glutathione S-transferase pi (GSTP1 protein)	TLGLYGKDQQEAALVDMVNDGVEDLR	9	99
48	trm|Q5TZY3|Q5TZY3_HUMAN	Glutathione S-transferase pi (GSTP1 protein)	YISLIYTNYEAGKDDYVK	4	99
49	spt|P07237|PDIA1_HUMAN	Protein disulfide-isomerase precursor (EC 5.3.4.1) (PDI) (Prolyl 4- hydroxylase subunit beta) (Cellular thyroid hormone-binding protein) (p55)	ALAPEYAK	8	99
49	spt|P07237|PDIA1_HUMAN	Protein disulfide-isomerase precursor (EC 5.3.4.1) (PDI) (Prolyl 4- hydroxylase subunit beta) (Cellular thyroid hormone-binding protein) (p55)	DAPEEEDHVLVLR	13	99
49	spt|P07237|PDIA1_HUMAN	Protein disulfide-isomerase precursor (EC 5.3.4.1) (PDI) (Prolyl 4- hydroxylase subunit beta) (Cellular thyroid hormone-binding protein) (p55)	DVESDSAK	2	99
49	spt|P07237|PDIA1_HUMAN	Protein disulfide-isomerase precursor (EC 5.3.4.1) (PDI) (Prolyl 4- hydroxylase subunit beta) (Cellular thyroid hormone-binding protein) (p55)	EADDIVNWLK	13	99
49	spt|P07237|PDIA1_HUMAN	Protein disulfide-isomerase precursor (EC 5.3.4.1) (PDI) (Prolyl 4- hydroxylase subunit beta) (Cellular thyroid hormone-binding protein) (p55)	FFPASADR	16	99
49	spt|P07237|PDIA1_HUMAN	Protein disulfide-isomerase precursor (EC 5.3.4.1) (PDI) (Prolyl 4- hydroxylase subunit beta) (Cellular thyroid hormone-binding protein) (p55)	FFRNGDTASPK	9	99
49	spt|P07237|PDIA1_HUMAN	Protein disulfide-isomerase precursor (EC 5.3.4.1) (PDI) (Prolyl 4- hydroxylase subunit beta) (Cellular thyroid hormone-binding protein) (p55)	ILEFFGLK	4	99
49	spt|P07237|PDIA1_HUMAN	Protein disulfide-isomerase precursor (EC 5.3.4.1) (PDI) (Prolyl 4- hydroxylase subunit beta) (Cellular thyroid hormone-binding protein) (p55)	KSNFAEALAAHK	2	99
49	spt|P07237|PDIA1_HUMAN	Protein disulfide-isomerase precursor (EC 5.3.4.1) (PDI) (Prolyl 4- hydroxylase subunit beta) (Cellular thyroid hormone-binding protein) (p55)	LITLEEEMTK	12	99
49	spt|P07237|PDIA1_HUMAN	Protein disulfide-isomerase precursor (EC 5.3.4.1) (PDI) (Prolyl 4- hydroxylase subunit beta) (Cellular thyroid hormone-binding protein) (p55)	LKAEGSEIR	8	99
49	spt|P07237|PDIA1_HUMAN	Protein disulfide-isomerase precursor (EC 5.3.4.1) (PDI) (Prolyl 4- hydroxylase subunit beta) (Cellular thyroid hormone-binding protein) (p55)	MDSTANEVEAVK	9	99
49	spt|P07237|PDIA1_HUMAN	Protein disulfide-isomerase precursor (EC 5.3.4.1) (PDI) (Prolyl 4- hydroxylase subunit beta) (Cellular thyroid hormone-binding protein) (p55)	NNFEGEVTKENLLDFIK	5	99
49	spt|P07237|PDIA1_HUMAN	Protein disulfide-isomerase precursor (EC 5.3.4.1) (PDI) (Prolyl 4- hydroxylase subunit beta) (Cellular thyroid hormone-binding protein) (p55)	QFLQAAEAIDDIPFGITSNSDVFSK	11	99
49	spt|P07237|PDIA1_HUMAN	Protein disulfide-isomerase precursor (EC 5.3.4.1) (PDI) (Prolyl 4- hydroxylase subunit beta) (Cellular thyroid hormone-binding protein) (p55)	TVIDYNGER	13	99
49	spt|P07237|PDIA1_HUMAN	Protein disulfide-isomerase precursor (EC 5.3.4.1) (PDI) (Prolyl 4- hydroxylase subunit beta) (Cellular thyroid hormone-binding protein) (p55)	VDATEESDLAQQYGVR	17	99
49	spt|P07237|PDIA1_HUMAN	Protein disulfide-isomerase precursor (EC 5.3.4.1) (PDI) (Prolyl 4- hydroxylase subunit beta) (Cellular thyroid hormone-binding protein) (p55)	YKPESEELTAER	6	99
49	spt|P07237|PDIA1_HUMAN	Protein disulfide-isomerase precursor (EC 5.3.4.1) (PDI) (Prolyl 4- hydroxylase subunit beta) (Cellular thyroid hormone-binding protein) (p55)	YQLDKDGVVLFK	2	99
50	trm|Q38L19|Q38L19_HUMAN	Heat shock protein 60	ALMLQGVDLLADAVAVTMGPK	9	99
50	trm|Q38L19|Q38L19_HUMAN	Heat shock protein 60	CEFQDAYVLLSEK	6	99
50	trm|Q38L19|Q38L19_HUMAN	Heat shock protein 60	CIPALDSLTPANEDQK	8	99
50	trm|Q38L19|Q38L19_HUMAN	Heat shock protein 60	GANPVEIR	11	99
50	trm|Q38L19|Q38L19_HUMAN	Heat shock protein 60	GYISPYFINTSK	10	99
50	trm|Q38L19|Q38L19_HUMAN	Heat shock protein 60	IQEIIEQLDVTTSEYEK	9	99
50	trm|Q38L19|Q38L19_HUMAN	Heat shock protein 60	ISSIQSIVPALEIANAHR	10	99
50	trm|Q38L19|Q38L19_HUMAN	Heat shock protein 60	LSDGVAVLK	14	99
50	trm|Q38L19|Q38L19_HUMAN	Heat shock protein 60	LVQDVANNTNEEAGDGTTTATVLAR	17	99
50	trm|Q38L19|Q38L19_HUMAN	Heat shock protein 60	NAGVEGSLIVEK	9	99
50	trm|Q38L19|Q38L19_HUMAN	Heat shock protein 60	SIAKEGFEK	4	99
50	trm|Q38L19|Q38L19_HUMAN	Heat shock protein 60	TLKIPAMTIAK	1	99
50	trm|Q38L19|Q38L19_HUMAN	Heat shock protein 60	TLNDELEIIEGMK	10	99
50	trm|Q38L19|Q38L19_HUMAN	Heat shock protein 60	TVIIEQSWGSPK	9	99
50	trm|Q38L19|Q38L19_HUMAN	Heat shock protein 60	VGEVIVTK	3	99
50	trm|Q38L19|Q38L19_HUMAN	Heat shock protein 60	VGGTSDVEVNEK	14	99
50	trm|Q38L19|Q38L19_HUMAN	Heat shock protein 60	VGGTSDVEVNEKKDR	8	99
50	trm|Q38L19|Q38L19_HUMAN	Heat shock protein 60	VGLQVVAVK	4	99
50	trm|Q38L19|Q38L19_HUMAN	Heat shock protein 60	VTDALNATR	15	99
50	trm|Q38L19|Q38L19_HUMAN	Heat shock protein 60	VTKDGVTVAK	4	99
51	spt|P08123|CO1A2_HUMAN	Collagen alpha-2(I) chain precursor	GAAGLPGVAGAPGLPGPR	4	99
51	spt|P08123|CO1A2_HUMAN	Collagen alpha-2(I) chain precursor	GAPGAVGAPGPAGATGDRGEAGAAGPAGPAGPR	4	99
51	spt|P08123|CO1A2_HUMAN	Collagen alpha-2(I) chain precursor	GETGPSGPVGPAGAVGPR	5	99
51	spt|P08123|CO1A2_HUMAN	Collagen alpha-2(I) chain precursor	GEVGPAGPNGFAGPAGAAGQPGAKGER	1	99
51	spt|P08123|CO1A2_HUMAN	Collagen alpha-2(I) chain precursor	GIPGPVGAAGATGAR	6	99
51	spt|P08123|CO1A2_HUMAN	Collagen alpha-2(I) chain precursor	GLHGEFGLPGPAGPR	2	99
51	spt|P08123|CO1A2_HUMAN	Collagen alpha-2(I) chain precursor	GLPGVAGAVGEPGPLGIAGPPGAR	6	99
51	spt|P08123|CO1A2_HUMAN	Collagen alpha-2(I) chain precursor	GPNGDAGRPGEPGLMGPR	4	99
51	spt|P08123|CO1A2_HUMAN	Collagen alpha-2(I) chain precursor	GPNGEAGSAGPPGPPGLR	3	99
51	spt|P08123|CO1A2_HUMAN	Collagen alpha-2(I) chain precursor	GPPGAAGAPGPQGFQGPAGEPGEPGQTGPAGAR	4	99
51	spt|P08123|CO1A2_HUMAN	Collagen alpha-2(I) chain precursor	GPPGAVGSPGVNGAPGEAGR	4	99
51	spt|P08123|CO1A2_HUMAN	Collagen alpha-2(I) chain precursor	GPPGESGAAGPTGPIGSR	4	99
51	spt|P08123|CO1A2_HUMAN	Collagen alpha-2(I) chain precursor	GVGLGPGPMGLMGPR	3	99
51	spt|P08123|CO1A2_HUMAN	Collagen alpha-2(I) chain precursor	GVVGPQGAR	3	99
51	spt|P08123|CO1A2_HUMAN	Collagen alpha-2(I) chain precursor	GYPGNIGPVGAAGAPGPHGPVGPAGK	2	99
51	spt|P08123|CO1A2_HUMAN	Collagen alpha-2(I) chain precursor	RGPNGEAGSAGPPGPPGLR	3	99
51	spt|P08123|CO1A2_HUMAN	Collagen alpha-2(I) chain precursor	TGHPGTVGPAGIR	2	99
51	spt|P08123|CO1A2_HUMAN	Collagen alpha-2(I) chain precursor	TGPPGPSGISGPPGPPGPAGK	4	99
51	spt|P08123|CO1A2_HUMAN	Collagen alpha-2(I) chain precursor	VGAPGPAGAR	4	99
52	trm|Q6ZN40|Q6ZN40_HUMAN	"CDNA FLJ16459 fis, clone BRCAN2002473, moderately similar to Tropomyosin, fibroblast isoform 2 "	AEADVASLNR	12	99
52	trm|Q6ZN40|Q6ZN40_HUMAN	"CDNA FLJ16459 fis, clone BRCAN2002473, moderately similar to Tropomyosin, fibroblast isoform 2 "	AEADVASLNRR	6	99
52	trm|Q6ZN40|Q6ZN40_HUMAN	"CDNA FLJ16459 fis, clone BRCAN2002473, moderately similar to Tropomyosin, fibroblast isoform 2 "	AEDSLLAAEEAAAK	4	99
52	trm|Q6ZN40|Q6ZN40_HUMAN	"CDNA FLJ16459 fis, clone BRCAN2002473, moderately similar to Tropomyosin, fibroblast isoform 2 "	AEQAEADKK	2	99
52	trm|Q6ZN40|Q6ZN40_HUMAN	"CDNA FLJ16459 fis, clone BRCAN2002473, moderately similar to Tropomyosin, fibroblast isoform 2 "	AQKDEEKMEIQEIQLK	6	99
52	trm|Q6ZN40|Q6ZN40_HUMAN	"CDNA FLJ16459 fis, clone BRCAN2002473, moderately similar to Tropomyosin, fibroblast isoform 2 "	ATDAEADVASLNR	10	99
52	trm|Q6ZN40|Q6ZN40_HUMAN	"CDNA FLJ16459 fis, clone BRCAN2002473, moderately similar to Tropomyosin, fibroblast isoform 2 "	ATDAEADVASLNRR	6	99
52	trm|Q6ZN40|Q6ZN40_HUMAN	"CDNA FLJ16459 fis, clone BRCAN2002473, moderately similar to Tropomyosin, fibroblast isoform 2 "	CAELEEELK	7	99
52	trm|Q6ZN40|Q6ZN40_HUMAN	"CDNA FLJ16459 fis, clone BRCAN2002473, moderately similar to Tropomyosin, fibroblast isoform 2 "	CAELEEELKTVTNNLK	8	99
52	trm|Q6ZN40|Q6ZN40_HUMAN	"CDNA FLJ16459 fis, clone BRCAN2002473, moderately similar to Tropomyosin, fibroblast isoform 2 "	HIAEDADR	3	99
52	trm|Q6ZN40|Q6ZN40_HUMAN	"CDNA FLJ16459 fis, clone BRCAN2002473, moderately similar to Tropomyosin, fibroblast isoform 2 "	IQLVEEELDR	13	99
52	trm|Q6ZN40|Q6ZN40_HUMAN	"CDNA FLJ16459 fis, clone BRCAN2002473, moderately similar to Tropomyosin, fibroblast isoform 2 "	IQLVEEELDRAQER	8	99
52	trm|Q6ZN40|Q6ZN40_HUMAN	"CDNA FLJ16459 fis, clone BRCAN2002473, moderately similar to Tropomyosin, fibroblast isoform 2 "	KATDAEADVASLNR	10	99
52	trm|Q6ZN40|Q6ZN40_HUMAN	"CDNA FLJ16459 fis, clone BRCAN2002473, moderately similar to Tropomyosin, fibroblast isoform 2 "	KATDAEADVASLNRR	6	99
52	trm|Q6ZN40|Q6ZN40_HUMAN	"CDNA FLJ16459 fis, clone BRCAN2002473, moderately similar to Tropomyosin, fibroblast isoform 2 "	KLVIIESDLER	7	99
52	trm|Q6ZN40|Q6ZN40_HUMAN	"CDNA FLJ16459 fis, clone BRCAN2002473, moderately similar to Tropomyosin, fibroblast isoform 2 "	KLVIIESDLERAEER	5	99
52	trm|Q6ZN40|Q6ZN40_HUMAN	"CDNA FLJ16459 fis, clone BRCAN2002473, moderately similar to Tropomyosin, fibroblast isoform 2 "	LATALQKLEEAEK	7	99
52	trm|Q6ZN40|Q6ZN40_HUMAN	"CDNA FLJ16459 fis, clone BRCAN2002473, moderately similar to Tropomyosin, fibroblast isoform 2 "	LATALQKLEEAEKAADESER	2	99
52	trm|Q6ZN40|Q6ZN40_HUMAN	"CDNA FLJ16459 fis, clone BRCAN2002473, moderately similar to Tropomyosin, fibroblast isoform 2 "	LDKENALDR	9	99
52	trm|Q6ZN40|Q6ZN40_HUMAN	"CDNA FLJ16459 fis, clone BRCAN2002473, moderately similar to Tropomyosin, fibroblast isoform 2 "	LDKENALDRAEQAEADKK	2	99
52	trm|Q6ZN40|Q6ZN40_HUMAN	"CDNA FLJ16459 fis, clone BRCAN2002473, moderately similar to Tropomyosin, fibroblast isoform 2 "	LEEAEKAADESER	7	99
52	trm|Q6ZN40|Q6ZN40_HUMAN	"CDNA FLJ16459 fis, clone BRCAN2002473, moderately similar to Tropomyosin, fibroblast isoform 2 "	LVIIESDLER	4	99
52	trm|Q6ZN40|Q6ZN40_HUMAN	"CDNA FLJ16459 fis, clone BRCAN2002473, moderately similar to Tropomyosin, fibroblast isoform 2 "	MEIQEIQLK	5	99
52	trm|Q6ZN40|Q6ZN40_HUMAN	"CDNA FLJ16459 fis, clone BRCAN2002473, moderately similar to Tropomyosin, fibroblast isoform 2 "	QLEEDIAAK	11	99
52	trm|Q6ZN40|Q6ZN40_HUMAN	"CDNA FLJ16459 fis, clone BRCAN2002473, moderately similar to Tropomyosin, fibroblast isoform 2 "	RIQLVEEELDR	9	99
52	trm|Q6ZN40|Q6ZN40_HUMAN	"CDNA FLJ16459 fis, clone BRCAN2002473, moderately similar to Tropomyosin, fibroblast isoform 2 "	RIQLVEEELDRAQER	8	99
52	trm|Q6ZN40|Q6ZN40_HUMAN	"CDNA FLJ16459 fis, clone BRCAN2002473, moderately similar to Tropomyosin, fibroblast isoform 2 "	SIDDLEEK	9	99
52	trm|Q6ZN40|Q6ZN40_HUMAN	"CDNA FLJ16459 fis, clone BRCAN2002473, moderately similar to Tropomyosin, fibroblast isoform 2 "	SKQLEEDIAAK	8	99
52	trm|Q6ZN40|Q6ZN40_HUMAN	"CDNA FLJ16459 fis, clone BRCAN2002473, moderately similar to Tropomyosin, fibroblast isoform 2 "	YSQKEDRYEEEIK	3	99
53	trm|Q5JNX2|Q5JNX2_HUMAN	Complement component 4A	ALEILQEEDLIDEDDIPVR	7	99
53	trm|Q5JNX2|Q5JNX2_HUMAN	Complement component 4A	AVGSGATFSHYYYMILSR	3	99
53	trm|Q5JNX2|Q5JNX2_HUMAN	Complement component 4A	DHAVDLIQK	2	99
53	trm|Q5JNX2|Q5JNX2_HUMAN	Complement component 4A	EELVYELNPLDHR	3	99
53	trm|Q5JNX2|Q5JNX2_HUMAN	Complement component 4A	GLQDEDGYR	4	99
53	trm|Q5JNX2|Q5JNX2_HUMAN	Complement component 4A	ITQVLHFTK	3	99
53	trm|Q5JNX2|Q5JNX2_HUMAN	Complement component 4A	STQDTVIALDALSAYWIASHTTEER	1	99
53	trm|Q5JNX2|Q5JNX2_HUMAN	Complement component 4A	TLEIPGNSDPNMIPDGDFNSYVR	6	99
53	trm|Q5JNX2|Q5JNX2_HUMAN	Complement component 4A	TTNIQGINLLFSSR	2	99
53	trm|Q5JNX2|Q5JNX2_HUMAN	Complement component 4A	VGDTLNLNLR	10	99
53	trm|Q5JNX2|Q5JNX2_HUMAN	Complement component 4A	VTASDPLDTLGSEGALSPGGVASLLR	10	99
54	spt|Q06830|PRDX1_HUMAN	Peroxiredoxin-1 (EC 1.11.1.15) (Thioredoxin peroxidase 2) (Thioredoxin-dependent peroxide reductase 2) (Proliferation-associated protein PAG) (Natural killer cell-enhancing factor A) (NKEF-A)	ADEGISFR	12	99
54	spt|Q06830|PRDX1_HUMAN	Peroxiredoxin-1 (EC 1.11.1.15) (Thioredoxin peroxidase 2) (Thioredoxin-dependent peroxide reductase 2) (Proliferation-associated protein PAG) (Natural killer cell-enhancing factor A) (NKEF-A)	ATAVMPDGQFK	9	99
54	spt|Q06830|PRDX1_HUMAN	Peroxiredoxin-1 (EC 1.11.1.15) (Thioredoxin peroxidase 2) (Thioredoxin-dependent peroxide reductase 2) (Proliferation-associated protein PAG) (Natural killer cell-enhancing factor A) (NKEF-A)	GLFIIDDK	15	99
54	spt|Q06830|PRDX1_HUMAN	Peroxiredoxin-1 (EC 1.11.1.15) (Thioredoxin peroxidase 2) (Thioredoxin-dependent peroxide reductase 2) (Proliferation-associated protein PAG) (Natural killer cell-enhancing factor A) (NKEF-A)	GLFIIDDKGILR	4	99
54	spt|Q06830|PRDX1_HUMAN	Peroxiredoxin-1 (EC 1.11.1.15) (Thioredoxin peroxidase 2) (Thioredoxin-dependent peroxide reductase 2) (Proliferation-associated protein PAG) (Natural killer cell-enhancing factor A) (NKEF-A)	IGHPAPNFK	16	99
54	spt|Q06830|PRDX1_HUMAN	Peroxiredoxin-1 (EC 1.11.1.15) (Thioredoxin peroxidase 2) (Thioredoxin-dependent peroxide reductase 2) (Proliferation-associated protein PAG) (Natural killer cell-enhancing factor A) (NKEF-A)	KQGGLGPMNIPLVSDPKR	4	99
54	spt|Q06830|PRDX1_HUMAN	Peroxiredoxin-1 (EC 1.11.1.15) (Thioredoxin peroxidase 2) (Thioredoxin-dependent peroxide reductase 2) (Proliferation-associated protein PAG) (Natural killer cell-enhancing factor A) (NKEF-A)	LVQAFQFTDK	15	99
54	spt|Q06830|PRDX1_HUMAN	Peroxiredoxin-1 (EC 1.11.1.15) (Thioredoxin peroxidase 2) (Thioredoxin-dependent peroxide reductase 2) (Proliferation-associated protein PAG) (Natural killer cell-enhancing factor A) (NKEF-A)	QGGLGPMNIPLVSDPKR	8	99
54	spt|Q06830|PRDX1_HUMAN	Peroxiredoxin-1 (EC 1.11.1.15) (Thioredoxin peroxidase 2) (Thioredoxin-dependent peroxide reductase 2) (Proliferation-associated protein PAG) (Natural killer cell-enhancing factor A) (NKEF-A)	QITVNDLPVGR	19	99
54	spt|Q06830|PRDX1_HUMAN	Peroxiredoxin-1 (EC 1.11.1.15) (Thioredoxin peroxidase 2) (Thioredoxin-dependent peroxide reductase 2) (Proliferation-associated protein PAG) (Natural killer cell-enhancing factor A) (NKEF-A)	TIAQDYGVLK	16	99
54	spt|Q06830|PRDX1_HUMAN	Peroxiredoxin-1 (EC 1.11.1.15) (Thioredoxin peroxidase 2) (Thioredoxin-dependent peroxide reductase 2) (Proliferation-associated protein PAG) (Natural killer cell-enhancing factor A) (NKEF-A)	TIAQDYGVLKADEGISFR	4	99
55	spt|P05164|PERM_HUMAN	Myeloperoxidase precursor (EC 1.11.1.7) (MPO) [Contains: 89 kDa myeloperoxidase; 84 kDa myeloperoxidase; Myeloperoxidase light chain; Myeloperoxidase heavy chain]	FCGLPQPETVGQLGTVLR	1	99
55	spt|P05164|PERM_HUMAN	Myeloperoxidase precursor (EC 1.11.1.7) (MPO) [Contains: 89 kDa myeloperoxidase; 84 kDa myeloperoxidase; Myeloperoxidase light chain; Myeloperoxidase heavy chain]	IANVFTNAFR	2	99
55	spt|P05164|PERM_HUMAN	Myeloperoxidase precursor (EC 1.11.1.7) (MPO) [Contains: 89 kDa myeloperoxidase; 84 kDa myeloperoxidase; Myeloperoxidase light chain; Myeloperoxidase heavy chain]	IGLDLPALNMQR	1	99
55	spt|P05164|PERM_HUMAN	Myeloperoxidase precursor (EC 1.11.1.7) (MPO) [Contains: 89 kDa myeloperoxidase; 84 kDa myeloperoxidase; Myeloperoxidase light chain; Myeloperoxidase heavy chain]	QNQIAVDEIR	1	99
55	spt|P05164|PERM_HUMAN	Myeloperoxidase precursor (EC 1.11.1.7) (MPO) [Contains: 89 kDa myeloperoxidase; 84 kDa myeloperoxidase; Myeloperoxidase light chain; Myeloperoxidase heavy chain]	VVLEGGIDPILR	3	99
56	spt|P07339|CATD_HUMAN	Cathepsin D precursor (EC 3.4.23.5) [Contains: Cathepsin D light chain; Cathepsin D heavy chain]	AIGAVPLIQGEYMIPCEK	11	99
56	spt|P07339|CATD_HUMAN	Cathepsin D precursor (EC 3.4.23.5) [Contains: Cathepsin D light chain; Cathepsin D heavy chain]	FDGILGMAYPR	7	99
56	spt|P07339|CATD_HUMAN	Cathepsin D precursor (EC 3.4.23.5) [Contains: Cathepsin D light chain; Cathepsin D heavy chain]	ISVNNVLPVFDNLMQQK	10	99
56	spt|P07339|CATD_HUMAN	Cathepsin D precursor (EC 3.4.23.5) [Contains: Cathepsin D light chain; Cathepsin D heavy chain]	LSPEDYTLK	10	99
56	spt|P07339|CATD_HUMAN	Cathepsin D precursor (EC 3.4.23.5) [Contains: Cathepsin D light chain; Cathepsin D heavy chain]	QPGITFIAAK	6	99
56	spt|P07339|CATD_HUMAN	Cathepsin D precursor (EC 3.4.23.5) [Contains: Cathepsin D light chain; Cathepsin D heavy chain]	QVFGEATKQPGITFIAAK	7	99
56	spt|P07339|CATD_HUMAN	Cathepsin D precursor (EC 3.4.23.5) [Contains: Cathepsin D light chain; Cathepsin D heavy chain]	VGFAEAAR	5	99
56	spt|P07339|CATD_HUMAN	Cathepsin D precursor (EC 3.4.23.5) [Contains: Cathepsin D light chain; Cathepsin D heavy chain]	VSTLPAITLK	7	99
57	trm|Q8TCD0|Q8TCD0_HUMAN	Hypothetical protein	DVVMTQSPLSLPVTLGQPASISCR	1	99
57	trm|Q8TCD0|Q8TCD0_HUMAN	Hypothetical protein	FSGSGSGTDFTLK	2	99
57	trm|Q8TCD0|Q8TCD0_HUMAN	Hypothetical protein	SGTASVVCLLNNFYPR	1	99
57	trm|Q8TCD0|Q8TCD0_HUMAN	Hypothetical protein	TVAAPSVFIFPPSDEQLK	2	99
57	trm|Q8TCD0|Q8TCD0_HUMAN	Hypothetical protein	VDNALQSGNSQESVTEQDSK	2	99
57	trm|Q8TCD0|Q8TCD0_HUMAN	Hypothetical protein	VDNALQSGNSQESVTEQDSKDSTYSLSSTLTLSK	2	99
57	trm|Q8TCD0|Q8TCD0_HUMAN	Hypothetical protein	VYACEVTHQGLSSPVTK	2	99
58	trm|Q6IPN6|Q6IPN6_HUMAN	Eukaryotic translation elongation factor 1 alpha 1	AAGAGKVTK	5	99
58	trm|Q6IPN6|Q6IPN6_HUMAN	Eukaryotic translation elongation factor 1 alpha 1	EHALLAYTLGVK	11	99
58	trm|Q6IPN6|Q6IPN6_HUMAN	Eukaryotic translation elongation factor 1 alpha 1	IGGIGTVPVGR	19	99
58	trm|Q6IPN6|Q6IPN6_HUMAN	Eukaryotic translation elongation factor 1 alpha 1	IGYNPDTVAFVPI	3	99
58	trm|Q6IPN6|Q6IPN6_HUMAN	Eukaryotic translation elongation factor 1 alpha 1	IGYNPDTVAFVPISGWNGDNMLEPSANMPWFK	4	99
58	trm|Q6IPN6|Q6IPN6_HUMAN	Eukaryotic translation elongation factor 1 alpha 1	LPLQDVYK	12	99
58	trm|Q6IPN6|Q6IPN6_HUMAN	Eukaryotic translation elongation factor 1 alpha 1	QLIVGVNK	9	99
58	trm|Q6IPN6|Q6IPN6_HUMAN	Eukaryotic translation elongation factor 1 alpha 1	QTVAVGVIK	19	99
58	trm|Q6IPN6|Q6IPN6_HUMAN	Eukaryotic translation elongation factor 1 alpha 1	SGDAAIVDMVPGKPMCVESF	2	99
58	trm|Q6IPN6|Q6IPN6_HUMAN	Eukaryotic translation elongation factor 1 alpha 1	SGDAAIVDMVPGKPMCVESFSDYPPLGR	11	99
58	trm|Q6IPN6|Q6IPN6_HUMAN	Eukaryotic translation elongation factor 1 alpha 1	STTTGHLIYK	13	99
58	trm|Q6IPN6|Q6IPN6_HUMAN	Eukaryotic translation elongation factor 1 alpha 1	TFAPVNVTTEVK	2	99
58	trm|Q6IPN6|Q6IPN6_HUMAN	Eukaryotic translation elongation factor 1 alpha 1	THINIVVIGHVDSGK	4	99
58	trm|Q6IPN6|Q6IPN6_HUMAN	Eukaryotic translation elongation factor 1 alpha 1	VETGVLKPGMVVTFAPVNVTTEVK	8	99
58	trm|Q6IPN6|Q6IPN6_HUMAN	Eukaryotic translation elongation factor 1 alpha 1	YYVTIIDAPGHR	4	99
59	trm|Q6S377|Q6S377_HUMAN	Plectin 10	AAEEAEEAR	1	99
59	trm|Q6S377|Q6S377_HUMAN	Plectin 10	ALQALEELR	2	99
59	trm|Q6S377|Q6S377_HUMAN	Plectin 10	ELAEEAAR	1	99
59	trm|Q6S377|Q6S377_HUMAN	Plectin 10	GTQGAEEVLR	2	99
59	trm|Q6S377|Q6S377_HUMAN	Plectin 10	LVASMEEAR	1	99
59	trm|Q6S377|Q6S377_HUMAN	Plectin 10	VLALPEPSPAAPTLR	1	99
60	trm|Q8NF12|Q8NF12_HUMAN	FLJ00390 protein (Fragment)	ALRPPMSQAR	9	99
60	trm|Q8NF12|Q8NF12_HUMAN	FLJ00390 protein (Fragment)	EAVIAAAFAK	12	99
60	trm|Q8NF12|Q8NF12_HUMAN	FLJ00390 protein (Fragment)	GASGIQGLAR	18	99
60	trm|Q8NF12|Q8NF12_HUMAN	FLJ00390 protein (Fragment)	LDRSGDGVVTVDDLR	9	99
60	trm|Q8NF12|Q8NF12_HUMAN	FLJ00390 protein (Fragment)	LGLVLDQAEAEGVCR	14	99
60	trm|Q8NF12|Q8NF12_HUMAN	FLJ00390 protein (Fragment)	MDAVDATMEK	16	99
60	trm|Q8NF12|Q8NF12_HUMAN	FLJ00390 protein (Fragment)	NGSGTLDLEEFLR	9	99
60	trm|Q8NF12|Q8NF12_HUMAN	FLJ00390 protein (Fragment)	SGDGVVTVDDLR	19	99
60	trm|Q8NF12|Q8NF12_HUMAN	FLJ00390 protein (Fragment)	SGEWTEDEVLR	7	99
60	trm|Q8NF12|Q8NF12_HUMAN	FLJ00390 protein (Fragment)	SGEWTEDEVLRR	4	99
60	trm|Q8NF12|Q8NF12_HUMAN	FLJ00390 protein (Fragment)	SLDADEFR	13	99
60	trm|Q8NF12|Q8NF12_HUMAN	FLJ00390 protein (Fragment)	SLDADEFRQGLAK	9	99
61	trm|Q6ZSH5|Q6ZSH5_HUMAN	"CDNA FLJ45525 fis, clone BRTHA2026311, highly similar to Protein disulfide isomerase A6 (EC 5.3.4.1) "	ALDLFSDNAPPPELLEIINEDIAK	5	99
61	trm|Q6ZSH5|Q6ZSH5_HUMAN	"CDNA FLJ45525 fis, clone BRTHA2026311, highly similar to Protein disulfide isomerase A6 (EC 5.3.4.1) "	DGELPVEDDIDLSDVELDDLGKDEL	9	99
61	trm|Q6ZSH5|Q6ZSH5_HUMAN	"CDNA FLJ45525 fis, clone BRTHA2026311, highly similar to Protein disulfide isomerase A6 (EC 5.3.4.1) "	GESPVDYDGGR	8	99
61	trm|Q6ZSH5|Q6ZSH5_HUMAN	"CDNA FLJ45525 fis, clone BRTHA2026311, highly similar to Protein disulfide isomerase A6 (EC 5.3.4.1) "	GSFSEQGINEFLR	10	99
61	trm|Q6ZSH5|Q6ZSH5_HUMAN	"CDNA FLJ45525 fis, clone BRTHA2026311, highly similar to Protein disulfide isomerase A6 (EC 5.3.4.1) "	GSTAPVGGGAFPTIVER	10	99
61	trm|Q6ZSH5|Q6ZSH5_HUMAN	"CDNA FLJ45525 fis, clone BRTHA2026311, highly similar to Protein disulfide isomerase A6 (EC 5.3.4.1) "	GSTAPVGGGAFPTIVEREPWDGR	5	99
61	trm|Q6ZSH5|Q6ZSH5_HUMAN	"CDNA FLJ45525 fis, clone BRTHA2026311, highly similar to Protein disulfide isomerase A6 (EC 5.3.4.1) "	IFQKGESPVDYDGGR	5	99
61	trm|Q6ZSH5|Q6ZSH5_HUMAN	"CDNA FLJ45525 fis, clone BRTHA2026311, highly similar to Protein disulfide isomerase A6 (EC 5.3.4.1) "	LAAVDATVNQVLASR	14	99
61	trm|Q6ZSH5|Q6ZSH5_HUMAN	"CDNA FLJ45525 fis, clone BRTHA2026311, highly similar to Protein disulfide isomerase A6 (EC 5.3.4.1) "	LYSSSDDVIELTPSNFNR	6	99
61	trm|Q6ZSH5|Q6ZSH5_HUMAN	"CDNA FLJ45525 fis, clone BRTHA2026311, highly similar to Protein disulfide isomerase A6 (EC 5.3.4.1) "	NLEPEWAAAASEVK	7	99
61	trm|Q6ZSH5|Q6ZSH5_HUMAN	"CDNA FLJ45525 fis, clone BRTHA2026311, highly similar to Protein disulfide isomerase A6 (EC 5.3.4.1) "	NLEPEWAAAASEVKEQTK	6	99
61	trm|Q6ZSH5|Q6ZSH5_HUMAN	"CDNA FLJ45525 fis, clone BRTHA2026311, highly similar to Protein disulfide isomerase A6 (EC 5.3.4.1) "	TGEAIVDAALSALR	12	99
62	trm|Q5U077|Q5U077_HUMAN	Lactate dehydrogenase B (Transformation-related protein 5)	GLTSVINQK	15	99
62	trm|Q5U077|Q5U077_HUMAN	Lactate dehydrogenase B (Transformation-related protein 5)	IHPVSTMVK	5	99
62	trm|Q5U077|Q5U077_HUMAN	Lactate dehydrogenase B (Transformation-related protein 5)	IVADKDYSVTANSK	9	99
62	trm|Q5U077|Q5U077_HUMAN	Lactate dehydrogenase B (Transformation-related protein 5)	IVVVTAGVR	19	99
62	trm|Q5U077|Q5U077_HUMAN	Lactate dehydrogenase B (Transformation-related protein 5)	LIAPVAEEEATVPNNK	9	99
62	trm|Q5U077|Q5U077_HUMAN	Lactate dehydrogenase B (Transformation-related protein 5)	LKDDEVAQLK	11	99
62	trm|Q5U077|Q5U077_HUMAN	Lactate dehydrogenase B (Transformation-related protein 5)	LKDDEVAQLKK	8	99
62	trm|Q5U077|Q5U077_HUMAN	Lactate dehydrogenase B (Transformation-related protein 5)	MVVESAYEVIK	7	99
62	trm|Q5U077|Q5U077_HUMAN	Lactate dehydrogenase B (Transformation-related protein 5)	QQEGESRLNLVQR	9	99
62	trm|Q5U077|Q5U077_HUMAN	Lactate dehydrogenase B (Transformation-related protein 5)	SADTLWDIQK	12	99
62	trm|Q5U077|Q5U077_HUMAN	Lactate dehydrogenase B (Transformation-related protein 5)	SLADELALVDVLEDK	11	99
62	trm|Q5U077|Q5U077_HUMAN	Lactate dehydrogenase B (Transformation-related protein 5)	VIGSGCNLDSAR	16	99
63	spt|Q15365|PCBP1_HUMAN	Poly(rC)-binding protein 1 (Alpha-CP1) (hnRNP-E1) (Nucleic acid- binding protein SUB2.3)	ESTGAQVQVAGDMLPNSTER	13	99
63	spt|Q15365|PCBP1_HUMAN	Poly(rC)-binding protein 1 (Alpha-CP1) (hnRNP-E1) (Nucleic acid- binding protein SUB2.3)	EVGSIIGK	2	99
63	spt|Q15365|PCBP1_HUMAN	Poly(rC)-binding protein 1 (Alpha-CP1) (hnRNP-E1) (Nucleic acid- binding protein SUB2.3)	IANPVEGSSGR	9	99
63	spt|Q15365|PCBP1_HUMAN	Poly(rC)-binding protein 1 (Alpha-CP1) (hnRNP-E1) (Nucleic acid- binding protein SUB2.3)	IITLTGPTNAIFK	6	99
63	spt|Q15365|PCBP1_HUMAN	Poly(rC)-binding protein 1 (Alpha-CP1) (hnRNP-E1) (Nucleic acid- binding protein SUB2.3)	INISEGNCPER	8	99
63	spt|Q15365|PCBP1_HUMAN	Poly(rC)-binding protein 1 (Alpha-CP1) (hnRNP-E1) (Nucleic acid- binding protein SUB2.3)	LVVPATQCGSLIGK	7	99
63	spt|Q15365|PCBP1_HUMAN	Poly(rC)-binding protein 1 (Alpha-CP1) (hnRNP-E1) (Nucleic acid- binding protein SUB2.3)	STAASRPPVTLR	1	99
63	spt|Q15365|PCBP1_HUMAN	Poly(rC)-binding protein 1 (Alpha-CP1) (hnRNP-E1) (Nucleic acid- binding protein SUB2.3)	VMTIPYQPMPASSPVICAGGQDR	8	99
64	trm|Q6FI10|Q6FI10_HUMAN	Fructose-bisphosphate aldolase	AAQEEYVKR	6	99
64	trm|Q6FI10|Q6FI10_HUMAN	Fructose-bisphosphate aldolase	ADDGRPFPQVIK	16	99
64	trm|Q6FI10|Q6FI10_HUMAN	Fructose-bisphosphate aldolase	ALANSLACQGK	10	99
64	trm|Q6FI10|Q6FI10_HUMAN	Fructose-bisphosphate aldolase	ALQASALK	10	99
64	trm|Q6FI10|Q6FI10_HUMAN	Fructose-bisphosphate aldolase	CPLLKPWALTF	1	99
64	trm|Q6FI10|Q6FI10_HUMAN	Fructose-bisphosphate aldolase	ELSDIAHR	6	99
64	trm|Q6FI10|Q6FI10_HUMAN	Fructose-bisphosphate aldolase	FSHEEIAMATVTALR	7	99
64	trm|Q6FI10|Q6FI10_HUMAN	Fructose-bisphosphate aldolase	GILAADESTGSIAK	17	99
64	trm|Q6FI10|Q6FI10_HUMAN	Fructose-bisphosphate aldolase	GILAADESTGSIAKR	8	99
64	trm|Q6FI10|Q6FI10_HUMAN	Fructose-bisphosphate aldolase	GVVPLAGTNGETTTQGLDGLSER	20	99
64	trm|Q6FI10|Q6FI10_HUMAN	Fructose-bisphosphate aldolase	IGEHTPSALAIMENANVLAR	14	99
64	trm|Q6FI10|Q6FI10_HUMAN	Fructose-bisphosphate aldolase	IVAPGKGILAADESTGSIAK	8	99
64	trm|Q6FI10|Q6FI10_HUMAN	Fructose-bisphosphate aldolase	IVAPGKGILAADESTGSIAKR	1	99
64	trm|Q6FI10|Q6FI10_HUMAN	Fructose-bisphosphate aldolase	KDGADFAK	3	99
64	trm|Q6FI10|Q6FI10_HUMAN	Fructose-bisphosphate aldolase	LQSIGTENTEENR	10	99
64	trm|Q6FI10|Q6FI10_HUMAN	Fructose-bisphosphate aldolase	LQSIGTENTEENRR	11	99
64	trm|Q6FI10|Q6FI10_HUMAN	Fructose-bisphosphate aldolase	PYQYPALTPEQK	8	99
64	trm|Q6FI10|Q6FI10_HUMAN	Fructose-bisphosphate aldolase	QLLLTADDR	8	99
64	trm|Q6FI10|Q6FI10_HUMAN	Fructose-bisphosphate aldolase	RLQSIGTENTEENRR	7	99
64	trm|Q6FI10|Q6FI10_HUMAN	Fructose-bisphosphate aldolase	TVPPAVTGITFLSGGQSEEEASINLNAINK	5	99
64	trm|Q6FI10|Q6FI10_HUMAN	Fructose-bisphosphate aldolase	VDKGVVPLAGTNGETTTQGLDGLSER	13	99
64	trm|Q6FI10|Q6FI10_HUMAN	Fructose-bisphosphate aldolase	YASICQQNGIVPIVEPEILPDGDHDLK	2	99
64	trm|Q6FI10|Q6FI10_HUMAN	Fructose-bisphosphate aldolase	YTPSGQAGAAASESLFVSNHAY	10	99
65	spt|P25705|ATPA_HUMAN	"ATP synthase subunit alpha, mitochondrial precursor (EC 3.6.3.14) "	AVDSLVPIGR	16	99
65	spt|P25705|ATPA_HUMAN	"ATP synthase subunit alpha, mitochondrial precursor (EC 3.6.3.14) "	EAYPGDVFYLHSR	7	99
65	spt|P25705|ATPA_HUMAN	"ATP synthase subunit alpha, mitochondrial precursor (EC 3.6.3.14) "	EVAAFAQFGSDLDAATQQLLSR	10	99
65	spt|P25705|ATPA_HUMAN	"ATP synthase subunit alpha, mitochondrial precursor (EC 3.6.3.14) "	ILGADTSVDLEETGR	13	99
65	spt|P25705|ATPA_HUMAN	"ATP synthase subunit alpha, mitochondrial precursor (EC 3.6.3.14) "	NVQAEEMVEFSSGLK	8	99
65	spt|P25705|ATPA_HUMAN	"ATP synthase subunit alpha, mitochondrial precursor (EC 3.6.3.14) "	QKTGTAEMSSILEER	2	99
65	spt|P25705|ATPA_HUMAN	"ATP synthase subunit alpha, mitochondrial precursor (EC 3.6.3.14) "	TGAIVDVPVGEELLGR	17	99
65	spt|P25705|ATPA_HUMAN	"ATP synthase subunit alpha, mitochondrial precursor (EC 3.6.3.14) "	TGTAEMSSILEER	11	99
65	spt|P25705|ATPA_HUMAN	"ATP synthase subunit alpha, mitochondrial precursor (EC 3.6.3.14) "	VLSIGDGIAR	13	99
66	trm|Q53HU0|Q53HU0_HUMAN	"Chaperonin containing TCP1, subunit 8 (Theta) variant (Fragment) "	AVDDGVNTFK	3	99
66	trm|Q53HU0|Q53HU0_HUMAN	"Chaperonin containing TCP1, subunit 8 (Theta) variant (Fragment) "	DIDEVSSLLR	8	99
66	trm|Q53HU0|Q53HU0_HUMAN	"Chaperonin containing TCP1, subunit 8 (Theta) variant (Fragment) "	DMLEAGILDTYLGK	5	99
66	trm|Q53HU0|Q53HU0_HUMAN	"Chaperonin containing TCP1, subunit 8 (Theta) variant (Fragment) "	ELEVQHPAAK	5	99
66	trm|Q53HU0|Q53HU0_HUMAN	"Chaperonin containing TCP1, subunit 8 (Theta) variant (Fragment) "	FAEAFEAIPR	6	99
66	trm|Q53HU0|Q53HU0_HUMAN	"Chaperonin containing TCP1, subunit 8 (Theta) variant (Fragment) "	IAVYSCPFDGMITETK	4	99
66	trm|Q53HU0|Q53HU0_HUMAN	"Chaperonin containing TCP1, subunit 8 (Theta) variant (Fragment) "	LATNAAVTVLR	7	99
66	trm|Q53HU0|Q53HU0_HUMAN	"Chaperonin containing TCP1, subunit 8 (Theta) variant (Fragment) "	LFVTNDAATILR	10	99
66	trm|Q53HU0|Q53HU0_HUMAN	"Chaperonin containing TCP1, subunit 8 (Theta) variant (Fragment) "	LVPGGGATEIELAK	4	99
66	trm|Q53HU0|Q53HU0_HUMAN	"Chaperonin containing TCP1, subunit 8 (Theta) variant (Fragment) "	QITSYGETCPGLEQYAIK	3	99
66	trm|Q53HU0|Q53HU0_HUMAN	"Chaperonin containing TCP1, subunit 8 (Theta) variant (Fragment) "	TVGATALPR	9	99
67	spt|P11586|C1TC_HUMAN	"C-1-tetrahydrofolate synthase, cytoplasmic (C1-THF synthase) [Includes: Methylenetetrahydrofolate dehydrogenase (EC 1.5.1.5); Methenyltetrahydrofolate cyclohydrolase (EC 3.5.4.9); Formyltetrahydrofolate synthetase (EC 6.3.4.3)] "	ETGVPIAGR	2	99
67	spt|P11586|C1TC_HUMAN	"C-1-tetrahydrofolate synthase, cytoplasmic (C1-THF synthase) [Includes: Methylenetetrahydrofolate dehydrogenase (EC 1.5.1.5); Methenyltetrahydrofolate cyclohydrolase (EC 3.5.4.9); Formyltetrahydrofolate synthetase (EC 6.3.4.3)] "	GALALAQAVQR	4	99
67	spt|P11586|C1TC_HUMAN	"C-1-tetrahydrofolate synthase, cytoplasmic (C1-THF synthase) [Includes: Methylenetetrahydrofolate dehydrogenase (EC 1.5.1.5); Methenyltetrahydrofolate cyclohydrolase (EC 3.5.4.9); Formyltetrahydrofolate synthetase (EC 6.3.4.3)] "	GVPTGFILPIR	4	99
67	spt|P11586|C1TC_HUMAN	"C-1-tetrahydrofolate synthase, cytoplasmic (C1-THF synthase) [Includes: Methylenetetrahydrofolate dehydrogenase (EC 1.5.1.5); Methenyltetrahydrofolate cyclohydrolase (EC 3.5.4.9); Formyltetrahydrofolate synthetase (EC 6.3.4.3)] "	LDIDPETITWQR	3	99
67	spt|P11586|C1TC_HUMAN	"C-1-tetrahydrofolate synthase, cytoplasmic (C1-THF synthase) [Includes: Methylenetetrahydrofolate dehydrogenase (EC 1.5.1.5); Methenyltetrahydrofolate cyclohydrolase (EC 3.5.4.9); Formyltetrahydrofolate synthetase (EC 6.3.4.3)] "	TDTESELDLISR	1	99
67	spt|P11586|C1TC_HUMAN	"C-1-tetrahydrofolate synthase, cytoplasmic (C1-THF synthase) [Includes: Methylenetetrahydrofolate dehydrogenase (EC 1.5.1.5); Methenyltetrahydrofolate cyclohydrolase (EC 3.5.4.9); Formyltetrahydrofolate synthetase (EC 6.3.4.3)] "	VLLSALER	3	99
67	spt|P11586|C1TC_HUMAN	"C-1-tetrahydrofolate synthase, cytoplasmic (C1-THF synthase) [Includes: Methylenetetrahydrofolate dehydrogenase (EC 1.5.1.5); Methenyltetrahydrofolate cyclohydrolase (EC 3.5.4.9); Formyltetrahydrofolate synthetase (EC 6.3.4.3)] "	YVVVTGITPTPLGEGK	2	99
68	trm|Q5TCG3|Q5TCG3_HUMAN	OTTHUMP00000016816	ATEHVNGNGTEEPMDTTSAVIHSENFQTLLDAGLPQK	1	99
68	trm|Q5TCG3|Q5TCG3_HUMAN	OTTHUMP00000016816	DLFEDELVPLFEK	3	99
68	trm|Q5TCG3|Q5TCG3_HUMAN	OTTHUMP00000016816	NLANTVTEEILEK	1	99
68	trm|Q5TCG3|Q5TCG3_HUMAN	OTTHUMP00000016816	TGYTLDVTTGQR	2	99
68	trm|Q5TCG3|Q5TCG3_HUMAN	OTTHUMP00000016816	VWGNVGTVEWADPIEDPDPEVMAK	1	99
69	spt|P07737|PROF1_HUMAN	Profilin-1 (Profilin I)	DSLLQDGEFSMDLR	18	99
69	spt|P07737|PROF1_HUMAN	Profilin-1 (Profilin I)	DSPSVWAAVPGK	7	99
69	spt|P07737|PROF1_HUMAN	Profilin-1 (Profilin I)	EGVHGGLINK	3	99
69	spt|P07737|PROF1_HUMAN	Profilin-1 (Profilin I)	NITPAEVGVLVGK	1	99
69	spt|P07737|PROF1_HUMAN	Profilin-1 (Profilin I)	PAEVGVLVGK	1	99
69	spt|P07737|PROF1_HUMAN	Profilin-1 (Profilin I)	SSFYVNGLTLGGQK	18	99
69	spt|P07737|PROF1_HUMAN	Profilin-1 (Profilin I)	STGGAPTFNVTVTK	8	99
69	spt|P07737|PROF1_HUMAN	Profilin-1 (Profilin I)	TDKTLVLLMGK	3	99
69	spt|P07737|PROF1_HUMAN	Profilin-1 (Profilin I)	TFVNITPAEVGVLVGK	12	99
69	spt|P07737|PROF1_HUMAN	Profilin-1 (Profilin I)	TFVNITPAEVGVLVGKDR	10	99
70	trm|Q53QP9|Q53QP9_HUMAN	"Hypothetical protein CCT4 (Chaperonin containing TCP1, subunit 4) (Delta) "	AFADAMEVIPSTLAENAGLNPISTVTELR	3	99
70	trm|Q53QP9|Q53QP9_HUMAN	"Hypothetical protein CCT4 (Chaperonin containing TCP1, subunit 4) (Delta) "	ALIAGGGAPEIELALR	5	99
70	trm|Q53QP9|Q53QP9_HUMAN	"Hypothetical protein CCT4 (Chaperonin containing TCP1, subunit 4) (Delta) "	DALSDLALHFLNK	4	99
70	trm|Q53QP9|Q53QP9_HUMAN	"Hypothetical protein CCT4 (Chaperonin containing TCP1, subunit 4) (Delta) "	FSNISAAK	6	99
70	trm|Q53QP9|Q53QP9_HUMAN	"Hypothetical protein CCT4 (Chaperonin containing TCP1, subunit 4) (Delta) "	PATATSVDLR	2	99
70	trm|Q53QP9|Q53QP9_HUMAN	"Hypothetical protein CCT4 (Chaperonin containing TCP1, subunit 4) (Delta) "	QMQVLHPAAR	13	99
70	trm|Q53QP9|Q53QP9_HUMAN	"Hypothetical protein CCT4 (Chaperonin containing TCP1, subunit 4) (Delta) "	VIDPATATSVDLR	11	99
70	trm|Q53QP9|Q53QP9_HUMAN	"Hypothetical protein CCT4 (Chaperonin containing TCP1, subunit 4) (Delta) "	VSNSGITR	6	99
70	trm|Q53QP9|Q53QP9_HUMAN	"Hypothetical protein CCT4 (Chaperonin containing TCP1, subunit 4) (Delta) "	VVSQYSSLLSPMSVNAVMK	3	99
71	trm|Q6N0B3|Q6N0B3_HUMAN	Hypothetical protein DKFZp686P03159	AEDGSVIDYELIDQDAR	7	99
71	trm|Q6N0B3|Q6N0B3_HUMAN	Hypothetical protein DKFZp686P03159	ALLYLCGGDD	12	99
71	trm|Q6N0B3|Q6N0B3_HUMAN	Hypothetical protein DKFZp686P03159	AYTNFDAER	6	99
71	trm|Q6N0B3|Q6N0B3_HUMAN	Hypothetical protein DKFZp686P03159	GVDEVTIVNILTNR	11	99
71	trm|Q6N0B3|Q6N0B3_HUMAN	Hypothetical protein DKFZp686P03159	LSLEGDHSTPPSAYGSVK	7	99
71	trm|Q6N0B3|Q6N0B3_HUMAN	Hypothetical protein DKFZp686P03159	QDIAFAYQR	4	99
71	trm|Q6N0B3|Q6N0B3_HUMAN	Hypothetical protein DKFZp686P03159	RAEDGSVIDYELIDQDAR	7	99
71	trm|Q6N0B3|Q6N0B3_HUMAN	Hypothetical protein DKFZp686P03159	STVHEILCK	4	99
71	trm|Q6N0B3|Q6N0B3_HUMAN	Hypothetical protein DKFZp686P03159	TDLEKDIISDTSGDFR	2	99
71	trm|Q6N0B3|Q6N0B3_HUMAN	Hypothetical protein DKFZp686P03159	TNQELQEINR	10	99
71	trm|Q6N0B3|Q6N0B3_HUMAN	Hypothetical protein DKFZp686P03159	WISIMTER	6	99
72	spt|P26038|MOES_HUMAN	Moesin (Membrane-organizing extension spike protein)	ALELEQER	14	99
72	spt|P26038|MOES_HUMAN	Moesin (Membrane-organizing extension spike protein)	ALTSELANAR	14	99
72	spt|P26038|MOES_HUMAN	Moesin (Membrane-organizing extension spike protein)	ALTSELANARDESK	7	99
72	spt|P26038|MOES_HUMAN	Moesin (Membrane-organizing extension spike protein)	APDFVFYAPR	14	99
72	spt|P26038|MOES_HUMAN	Moesin (Membrane-organizing extension spike protein)	AQQELEEQTR	5	99
72	spt|P26038|MOES_HUMAN	Moesin (Membrane-organizing extension spike protein)	EALLQASR	7	99
72	spt|P26038|MOES_HUMAN	Moesin (Membrane-organizing extension spike protein)	EVWFFGLQYQDTK	2	99
72	spt|P26038|MOES_HUMAN	Moesin (Membrane-organizing extension spike protein)	FYPEDVSEELIQDITQR	5	99
72	spt|P26038|MOES_HUMAN	Moesin (Membrane-organizing extension spike protein)	IAQDLEMYGVNYFSIK	3	99
72	spt|P26038|MOES_HUMAN	Moesin (Membrane-organizing extension spike protein)	IGFPWSEIR	12	99
72	spt|P26038|MOES_HUMAN	Moesin (Membrane-organizing extension spike protein)	ISQLEMAR	15	99
72	spt|P26038|MOES_HUMAN	Moesin (Membrane-organizing extension spike protein)	KAQQELEEQTR	6	99
72	spt|P26038|MOES_HUMAN	Moesin (Membrane-organizing extension spike protein)	KESPLLFK	2	99
72	spt|P26038|MOES_HUMAN	Moesin (Membrane-organizing extension spike protein)	KPDTIEVQQMK	3	99
72	spt|P26038|MOES_HUMAN	Moesin (Membrane-organizing extension spike protein)	LKQIEEQTK	5	99
72	spt|P26038|MOES_HUMAN	Moesin (Membrane-organizing extension spike protein)	QEAEEAKEALLQASR	4	99
72	spt|P26038|MOES_HUMAN	Moesin (Membrane-organizing extension spike protein)	TAMSTPHVAEPAENEQDEQDENGAEASADLR	8	99
72	spt|P26038|MOES_HUMAN	Moesin (Membrane-organizing extension spike protein)	TQEQLALEMAELTAR	12	99
73	spt|P04792|HSPB1_HUMAN	Heat-shock protein beta-1 (HspB1) (Heat shock 27 kDa protein) (HSP 27) (Stress-responsive protein 27) (SRP27) (Estrogen-regulated 24 kDa protein) (28 kDa heat shock protein)	AQLGGPEAAK	6	99
73	spt|P04792|HSPB1_HUMAN	Heat-shock protein beta-1 (HspB1) (Heat shock 27 kDa protein) (HSP 27) (Stress-responsive protein 27) (SRP27) (Estrogen-regulated 24 kDa protein) (28 kDa heat shock protein)	AQLGGPEAAKSDETAA	4	99
73	spt|P04792|HSPB1_HUMAN	Heat-shock protein beta-1 (HspB1) (Heat shock 27 kDa protein) (HSP 27) (Stress-responsive protein 27) (SRP27) (Estrogen-regulated 24 kDa protein) (28 kDa heat shock protein)	AQLGGPEAAKSDETAAK	7	99
73	spt|P04792|HSPB1_HUMAN	Heat-shock protein beta-1 (HspB1) (Heat shock 27 kDa protein) (HSP 27) (Stress-responsive protein 27) (SRP27) (Estrogen-regulated 24 kDa protein) (28 kDa heat shock protein)	DGVVEITGK	3	99
73	spt|P04792|HSPB1_HUMAN	Heat-shock protein beta-1 (HspB1) (Heat shock 27 kDa protein) (HSP 27) (Stress-responsive protein 27) (SRP27) (Estrogen-regulated 24 kDa protein) (28 kDa heat shock protein)	IESPAVAAPAYSR	1	99
73	spt|P04792|HSPB1_HUMAN	Heat-shock protein beta-1 (HspB1) (Heat shock 27 kDa protein) (HSP 27) (Stress-responsive protein 27) (SRP27) (Estrogen-regulated 24 kDa protein) (28 kDa heat shock protein)	KYTLPPGVDPTQVSSSLSPEGTLTVEAPMPK	7	99
73	spt|P04792|HSPB1_HUMAN	Heat-shock protein beta-1 (HspB1) (Heat shock 27 kDa protein) (HSP 27) (Stress-responsive protein 27) (SRP27) (Estrogen-regulated 24 kDa protein) (28 kDa heat shock protein)	LATQSNEITIPVTFESR	15	99
73	spt|P04792|HSPB1_HUMAN	Heat-shock protein beta-1 (HspB1) (Heat shock 27 kDa protein) (HSP 27) (Stress-responsive protein 27) (SRP27) (Estrogen-regulated 24 kDa protein) (28 kDa heat shock protein)	LFDQAFGLPR	12	99
73	spt|P04792|HSPB1_HUMAN	Heat-shock protein beta-1 (HspB1) (Heat shock 27 kDa protein) (HSP 27) (Stress-responsive protein 27) (SRP27) (Estrogen-regulated 24 kDa protein) (28 kDa heat shock protein)	LPEEWSQWLGGSSWPGYVR	3	99
73	spt|P04792|HSPB1_HUMAN	Heat-shock protein beta-1 (HspB1) (Heat shock 27 kDa protein) (HSP 27) (Stress-responsive protein 27) (SRP27) (Estrogen-regulated 24 kDa protein) (28 kDa heat shock protein)	PLPPAAIESPAVAAPAYSR	3	99
73	spt|P04792|HSPB1_HUMAN	Heat-shock protein beta-1 (HspB1) (Heat shock 27 kDa protein) (HSP 27) (Stress-responsive protein 27) (SRP27) (Estrogen-regulated 24 kDa protein) (28 kDa heat shock protein)	QDEHGYISR	14	99
73	spt|P04792|HSPB1_HUMAN	Heat-shock protein beta-1 (HspB1) (Heat shock 27 kDa protein) (HSP 27) (Stress-responsive protein 27) (SRP27) (Estrogen-regulated 24 kDa protein) (28 kDa heat shock protein)	QLSSGVSEIR	14	99
73	spt|P04792|HSPB1_HUMAN	Heat-shock protein beta-1 (HspB1) (Heat shock 27 kDa protein) (HSP 27) (Stress-responsive protein 27) (SRP27) (Estrogen-regulated 24 kDa protein) (28 kDa heat shock protein)	VSLDVNHFAPDELTVK	14	99
74	trm|Q53FI1|Q53FI1_HUMAN	L-plastin variant (Fragment)	AACLPLPGYR	1	99
74	trm|Q53FI1|Q53FI1_HUMAN	L-plastin variant (Fragment)	FSLVGIGGQDLNEGNR	6	99
74	trm|Q53FI1|Q53FI1_HUMAN	L-plastin variant (Fragment)	ISTSLPVLDLIDAIQPGSINYDLLK	3	99
74	trm|Q53FI1|Q53FI1_HUMAN	L-plastin variant (Fragment)	MINLSVPDTIDER	10	99
74	trm|Q53FI1|Q53FI1_HUMAN	L-plastin variant (Fragment)	QFVTATDVVR	9	99
74	trm|Q53FI1|Q53FI1_HUMAN	L-plastin variant (Fragment)	VYALPEDLVEVNPK	6	99
75	trm|Q549N7|Q549N7_HUMAN	Mutant beta-globin	EFTPPVQAAYQK	12	99
75	trm|Q549N7|Q549N7_HUMAN	Mutant beta-globin	ESFGDLSTPDAVMGNPK	4	99
75	trm|Q549N7|Q549N7_HUMAN	Mutant beta-globin	FFESFGDLSTPDAV	3	99
75	trm|Q549N7|Q549N7_HUMAN	Mutant beta-globin	FFESFGDLSTPDAVMGN	15	99
75	trm|Q549N7|Q549N7_HUMAN	Mutant beta-globin	FFESFGDLSTPDAVMGNPK	19	99
75	trm|Q549N7|Q549N7_HUMAN	Mutant beta-globin	GDLSTPDAVMGNPK	11	99
75	trm|Q549N7|Q549N7_HUMAN	Mutant beta-globin	GKVNVDEVGGEALGR	2	99
75	trm|Q549N7|Q549N7_HUMAN	Mutant beta-globin	GLAHLDNLK	3	99
75	trm|Q549N7|Q549N7_HUMAN	Mutant beta-globin	GTFATLSELHCDK	6	99
75	trm|Q549N7|Q549N7_HUMAN	Mutant beta-globin	KVLGAFSDGLAHLDNLK	11	99
75	trm|Q549N7|Q549N7_HUMAN	Mutant beta-globin	LHVDPENFR	7	99
75	trm|Q549N7|Q549N7_HUMAN	Mutant beta-globin	LLVVYPWTQR	20	99
75	trm|Q549N7|Q549N7_HUMAN	Mutant beta-globin	PDAVMGNPK	11	99
75	trm|Q549N7|Q549N7_HUMAN	Mutant beta-globin	SAVTALWGK	19	99
75	trm|Q549N7|Q549N7_HUMAN	Mutant beta-globin	SAVTALWGKVNVDEVGGEALGR	8	99
75	trm|Q549N7|Q549N7_HUMAN	Mutant beta-globin	SDGLAHLDNLK	6	99
75	trm|Q549N7|Q549N7_HUMAN	Mutant beta-globin	STPDAVMGNPK	3	99
75	trm|Q549N7|Q549N7_HUMAN	Mutant beta-globin	VDEVGGEALGR	8	99
75	trm|Q549N7|Q549N7_HUMAN	Mutant beta-globin	VHLTPEEK	18	99
75	trm|Q549N7|Q549N7_HUMAN	Mutant beta-globin	VLGAFSDGLAHLDNLK	9	99
75	trm|Q549N7|Q549N7_HUMAN	Mutant beta-globin	VNVDEVGGEAL	9	99
75	trm|Q549N7|Q549N7_HUMAN	Mutant beta-globin	VNVDEVGGEALGR	19	99
75	trm|Q549N7|Q549N7_HUMAN	Mutant beta-globin	VVAGVANALAHK	17	99
75	trm|Q549N7|Q549N7_HUMAN	Mutant beta-globin	VVAGVANALAHKYH	11	99
76	spt|P19338|NUCL_HUMAN	Nucleolin (Protein C23)	ALELTGLK	5	99
76	spt|P19338|NUCL_HUMAN	Nucleolin (Protein C23)	EVFEDAAEIR	3	99
76	spt|P19338|NUCL_HUMAN	Nucleolin (Protein C23)	GFGFVDFNSEEDAK	8	99
76	spt|P19338|NUCL_HUMAN	Nucleolin (Protein C23)	GLSEDTTEETLKESFDGSVR	1	99
76	spt|P19338|NUCL_HUMAN	Nucleolin (Protein C23)	GYAFIEFASFEDAK	2	99
76	spt|P19338|NUCL_HUMAN	Nucleolin (Protein C23)	NDLAVVDVR	10	99
76	spt|P19338|NUCL_HUMAN	Nucleolin (Protein C23)	TGISDVFAK	5	99
76	spt|P19338|NUCL_HUMAN	Nucleolin (Protein C23)	VAVATPAK	7	99
76	spt|P19338|NUCL_HUMAN	Nucleolin (Protein C23)	VEGTEPTTAFNLFVGNLNFNK	3	99
76	spt|P19338|NUCL_HUMAN	Nucleolin (Protein C23)	VTQDELKEVFEDAAEIR	4	99
77	trm|Q5U4P6|Q5U4P6_HUMAN	KHSRP protein	AINQQTGAFVEISR	8	99
77	trm|Q5U4P6|Q5U4P6_HUMAN	KHSRP protein	DAFADAVQR	5	99
77	trm|Q5U4P6|Q5U4P6_HUMAN	KHSRP protein	GGGGPGGGGPGGGSAGGPSQPPGGGGPGIR	15	99
77	trm|Q5U4P6|Q5U4P6_HUMAN	KHSRP protein	GSPQQIDHAK	8	99
77	trm|Q5U4P6|Q5U4P6_HUMAN	KHSRP protein	IGGGIDVPVPR	14	99
77	trm|Q5U4P6|Q5U4P6_HUMAN	KHSRP protein	IGQQPQQPGAPPQQDYTK	6	99
77	trm|Q5U4P6|Q5U4P6_HUMAN	KHSRP protein	IINDLLQSLR	6	99
77	trm|Q5U4P6|Q5U4P6_HUMAN	KHSRP protein	IQFKQDDGTGPEK	4	99
77	trm|Q5U4P6|Q5U4P6_HUMAN	KHSRP protein	MMLDDIVSR	5	99
77	trm|Q5U4P6|Q5U4P6_HUMAN	KHSRP protein	QLEDGDQPESK	9	99
77	trm|Q5U4P6|Q5U4P6_HUMAN	KHSRP protein	SVSLTGAPESVQK	3	99
77	trm|Q5U4P6|Q5U4P6_HUMAN	KHSRP protein	VQISPDSGGLPER	8	99
78	trm|Q53FP8|Q53FP8_HUMAN	"Calponin 1, basic, smooth muscle variant (Fragment) "	DGIILCEFINK	3	99
78	trm|Q53FP8|Q53FP8_HUMAN	"Calponin 1, basic, smooth muscle variant (Fragment) "	EWIEGVTGR	10	99
78	trm|Q53FP8|Q53FP8_HUMAN	"Calponin 1, basic, smooth muscle variant (Fragment) "	FASQQGMTAYGTR	10	99
78	trm|Q53FP8|Q53FP8_HUMAN	"Calponin 1, basic, smooth muscle variant (Fragment) "	GASQAGMTAPGTK	4	99
78	trm|Q53FP8|Q53FP8_HUMAN	"Calponin 1, basic, smooth muscle variant (Fragment) "	GASQAGMTAPGTKR	6	99
78	trm|Q53FP8|Q53FP8_HUMAN	"Calponin 1, basic, smooth muscle variant (Fragment) "	GMTVYGLPR	10	99
78	trm|Q53FP8|Q53FP8_HUMAN	"Calponin 1, basic, smooth muscle variant (Fragment) "	GPAYGLSAEVK	7	99
78	trm|Q53FP8|Q53FP8_HUMAN	"Calponin 1, basic, smooth muscle variant (Fragment) "	IGNNFMDGLK	6	99
78	trm|Q53FP8|Q53FP8_HUMAN	"Calponin 1, basic, smooth muscle variant (Fragment) "	INESTQNWHQLENIGNFIK	4	99
78	trm|Q53FP8|Q53FP8_HUMAN	"Calponin 1, basic, smooth muscle variant (Fragment) "	LGTDQPLDQATISLQMGTNK	6	99
78	trm|Q53FP8|Q53FP8_HUMAN	"Calponin 1, basic, smooth muscle variant (Fragment) "	NIIGLQMGTNK	6	99
79	trm|Q53GL5|Q53GL5_HUMAN	"Isocitrate dehydrogenase 2 (NADP+), mitochondrial variant (Fragment) "	ATDFVADR	9	99
79	trm|Q53GL5|Q53GL5_HUMAN	"Isocitrate dehydrogenase 2 (NADP+), mitochondrial variant (Fragment) "	CATITPDEAR	6	99
79	trm|Q53GL5|Q53GL5_HUMAN	"Isocitrate dehydrogenase 2 (NADP+), mitochondrial variant (Fragment) "	DLAGCIHGLSNVK	6	99
79	trm|Q53GL5|Q53GL5_HUMAN	"Isocitrate dehydrogenase 2 (NADP+), mitochondrial variant (Fragment) "	LIDDMVAQVLK	7	99
79	trm|Q53GL5|Q53GL5_HUMAN	"Isocitrate dehydrogenase 2 (NADP+), mitochondrial variant (Fragment) "	LVPGWTKPITIGR	6	99
79	trm|Q53GL5|Q53GL5_HUMAN	"Isocitrate dehydrogenase 2 (NADP+), mitochondrial variant (Fragment) "	NILGGTVFR	7	99
79	trm|Q53GL5|Q53GL5_HUMAN	"Isocitrate dehydrogenase 2 (NADP+), mitochondrial variant (Fragment) "	TIEAEAAHGTVTR	10	99
79	trm|Q53GL5|Q53GL5_HUMAN	"Isocitrate dehydrogenase 2 (NADP+), mitochondrial variant (Fragment) "	VCVETVESGAMTK	2	99
79	trm|Q53GL5|Q53GL5_HUMAN	"Isocitrate dehydrogenase 2 (NADP+), mitochondrial variant (Fragment) "	YFDLGLPNR	3	99
80	trm|Q5EBM2|Q5EBM2_HUMAN	Hypothetical protein	ALPAPIEK	9	99
80	trm|Q5EBM2|Q5EBM2_HUMAN	Hypothetical protein	APELLGGPSVFLFPPKPK	1	99
80	trm|Q5EBM2|Q5EBM2_HUMAN	Hypothetical protein	CPAPELLGGPSVFLFPPKPK	4	99
80	trm|Q5EBM2|Q5EBM2_HUMAN	Hypothetical protein	DGVEVHNAK	3	99
80	trm|Q5EBM2|Q5EBM2_HUMAN	Hypothetical protein	EPQVYTLPPSR	8	99
80	trm|Q5EBM2|Q5EBM2_HUMAN	Hypothetical protein	EPQVYTLPPSREEMTK	7	99
80	trm|Q5EBM2|Q5EBM2_HUMAN	Hypothetical protein	GPSVFPLAPCSR	8	99
80	trm|Q5EBM2|Q5EBM2_HUMAN	Hypothetical protein	NQVSLTCLVK	4	99
80	trm|Q5EBM2|Q5EBM2_HUMAN	Hypothetical protein	QVQLVQSGAEVK	9	99
80	trm|Q5EBM2|Q5EBM2_HUMAN	Hypothetical protein	SCDTPPPCPR	7	99
80	trm|Q5EBM2|Q5EBM2_HUMAN	Hypothetical protein	STSGGTAALGCLVK	6	99
80	trm|Q5EBM2|Q5EBM2_HUMAN	Hypothetical protein	SVFPLAPCSR	2	99
80	trm|Q5EBM2|Q5EBM2_HUMAN	Hypothetical protein	TPLGDTTHTCPR	4	99
80	trm|Q5EBM2|Q5EBM2_HUMAN	Hypothetical protein	TTPPMLDSDGSFFLYSK	9	99
80	trm|Q5EBM2|Q5EBM2_HUMAN	Hypothetical protein	VVSVLTVLHQDWLNGK	4	99
80	trm|Q5EBM2|Q5EBM2_HUMAN	Hypothetical protein	VVSVLTVLHQDWLNGKEYK	3	99
80	trm|Q5EBM2|Q5EBM2_HUMAN	Hypothetical protein	WYVDGVEVHNAK	4	99
81	spt|P31948|STIP1_HUMAN	Stress-induced-phosphoprotein 1 (STI1) (Hsc70/Hsp90-organizing protein) (Hop) (Transformation-sensitive protein IEF SSP 3521) (NY- REN-11 antigen)	AAALEFLNR	1	99
81	spt|P31948|STIP1_HUMAN	Stress-induced-phosphoprotein 1 (STI1) (Hsc70/Hsp90-organizing protein) (Hop) (Transformation-sensitive protein IEF SSP 3521) (NY- REN-11 antigen)	ALSVGNIDDALQCYSEAIK	2	99
81	spt|P31948|STIP1_HUMAN	Stress-induced-phosphoprotein 1 (STI1) (Hsc70/Hsp90-organizing protein) (Hop) (Transformation-sensitive protein IEF SSP 3521) (NY- REN-11 antigen)	LAYINPDLALEEK	2	99
81	spt|P31948|STIP1_HUMAN	Stress-induced-phosphoprotein 1 (STI1) (Hsc70/Hsp90-organizing protein) (Hop) (Transformation-sensitive protein IEF SSP 3521) (NY- REN-11 antigen)	LMDVGLIAIR	1	99
[truncated: 3,854 more rows]
