# Supplementary material for: Identification of Novel Molecular Targets for Endometrial Cancer Using a Drill-Down LC-MS/MS Approach with iTRAQ
Source: PLoS One. 2011 Jan 31;6(1):e16352. doi: 10.1371/journal.pone.0016352 (PMC3031560; doi:10.1371/journal.pone.0016352)
Supplement: Table S4 — Samples in which each protein from Table 2 has been identified. (XLS) [file pone.0016352.s006.xls]

## Sheet: Table S4
Table S4: Samples in which each protein from Tables 2 and 3 has been identified.
		Set1			Set2			Set3			Set4			Set5			Set6			Set7
Protein	Accession	Iter1	Iter2	Iter3	Iter1	Iter2	Iter3	Iter1	Iter2	Iter3	Iter1	Iter2	Iter3	Iter1	Iter2	Iter3	Iter1	Iter2	Iter3	Iter1	Iter2	Iter3
40S ribosomal protein S25	P62851	X						X		X	X	X						X
Acyl-CoA-binding protein (ACBP) (Diazepam-binding inhibitor) (DBI) (Endozepine) (EP) "Diazepam binding inhibitor, splice form 1c "	P07108					X		X	X	X	X			X	X	X				X	X
Adenosylhomocysteinase (EC 3.3.1.1) (S-adenosyl-L-homocysteine hydrolase) (AdoHcyase)	P23526	X			X												X	X	X	X	X	X
Alpha-1 antitrypsin variant Alpha-1-antitrypsin precursor (Alpha-1 protease inhibitor) (Alpha-1- antiproteinase)	P01009	X		X	X	X	X	X			X	X		X	X	X	X	X	X	X	X	X
Alpha-2-HS-glycoprotein precursor (Fetuin-A) (Alpha-2-Z-globulin) (Ba- alpha-2-glycoprotein) [Contains: Alpha-2-HS-glycoprotein chain A; Alpha-2-HS-glycoprotein chain B]	P02765	X	X	X	X	X		X		X								X	X	X	X	X
Alpha-2-macroglobulin precursor (Alpha-2-M)	P01023	X	X	X	X	X				X		X					X	X	X	X	X	X
AGR2 Anterior gradient protein 2 homolog precursor (Secreted cement gland protein XAG-2 homolog) (AG-2 protein) (hAG-2) (HPC8) Anterior gradient 2 homolog (Fragment)	O95994	X			X	X		X		X	X	X		X		X	X	X	X
Apolipoprotein A-I precursor (Apo-AI) (ApoA-I) [Contains: Apolipoprotein A-I(1-242)]	P02647	X	X	X	X	X	X				X		X				X	X	X	X	X	X
Apolipoprotein A-II precursor (Apo-AII) (ApoA-II) [Contains: Apolipoprotein A-II(1-76)]	P02652				X			X			X						X	X	X	X	X	X
Phosphoprotein enriched in astrocytes 15 Phosphoprotein enriched in astrocytes 15 PEA15 protein Astrocytic phosphoprotein PEA-15 (Phosphoprotein enriched in diabetes) (PED)	Q15121				X			X							X							X
Beta-2-glycoprotein 1 precursor (Beta-2-glycoprotein I) (Apolipoprotein H) (Apo-H) (B2GPI) (Beta(2)GPI) (Activated protein C- binding protein) (APC inhibitor) (Anticardiolipin cofactor)	P02749	X															X	X		X
FLJ00390 protein (Fragment) Calcyphosin (Calcyphosine)	Q13938	X	X	X	X	X	X	X	X	X	X	X		X	X	X	X	X	X	X	X	X
Hypothetical protein CALU Calumenin precursor (Crocalbin) (IEF SSP 9302)	O43852	X				X													X		X
Cathepsin B precursor (EC 3.4.22.1) (Cathepsin B1) (APP secretase) (APPS) [Contains: Cathepsin B light chain; Cathepsin B heavy chain]	P07858	X	X	X	X			X		X						X	X	X	X	X		X
Ceruloplasmin precursor (EC 1.16.3.1) (Ferroxidase) Ceruloplasmin (Fragment)	P00450	X			X												X	X	X	X	X	X
Chaperonin containing TCP1, subunit 7 (Eta) variant (Fragment) T-complex protein 1 subunit eta (TCP-1-eta) (CCT-eta) (HIV-1 Nef- interacting protein)	Q99832	X			X											X		X		X	X
Collagen, type I, alpha 1 Pro alpha 1(I) collagen Collagen alpha-1(I) chain precursor Collagen alpha 1 chain variant (Fragment)	P02452	X	X	X	X	X		X	X	X	X	X				X				X	X	X
Collagen alpha-2(I) chain precursor Prepro-alpha2(I) collagen precursor "Collagen, type I, alpha 2 "	P08123	X		X	X			X								X		X		X
Dihydropyrimidinase-like 2 variant (Fragment) Dihydropyrimidinase-related protein 2 (DRP-2) (Collapsin response mediator protein 2) (CRMP-2) (N2A3) Dihydropyrimidinase-like 2 variant (Fragment)	Q16555	X			X	X	X	X		X		X			X				X	X	X	X
Full-length cDNA clone CS0DL010YH08 of B cells (Ramos cell line) of Homo sapiens (human) Eukaryotic translation initiation factor 2 subunit 1 (Eukaryotic translation initiation factor 2 subunit alpha) (eIF-2-alpha) (EIF- 2alpha) (EIF-2A)	P05198					X		X		X						X		X				X
F-actin capping protein subunit beta (CapZ beta) "Capping protein (Actin filament) muscle Z-line, beta (Fragment) " "Capping protein (Actin filament) muscle Z-line, beta (Fragment) " "Capping protein (Actin filament) muscle Z-line, beta " "Capping protein (Actin filament) muscle Z-line, beta " "Capping protein (Actin filament) muscle Z-line, beta " "Capping protein (Actin filament) muscle Z-line,…	P47756	X			X													X			X
Fibrinogen alpha chain precursor [Contains: Fibrinopeptide A] "Fibrinogen alpha chain (Fibrinogen, alpha chain, isoform alpha preproprotein) "	P02671	X	X	X	X	X	X	X		X			X			X	X	X	X	X	X	X
Fibrinogen beta chain precursor [Contains: Fibrinopeptide B]	P02675	X		X	X	X	X	X		X				X			X	X	X	X	X	X
Fibrinogen, gamma polypeptide Fibrinogen gamma chain precursor	P02679	X			X		X	X									X		X	X
Fibulin-1 precursor	P23142	X						X				X					X		X	X	X
Filamin-C (Gamma-filamin) (Filamin-2) (Protein FLNc) (Actin-binding- like protein) (ABP-L) (ABP-280-like protein)	Q14315	X																X		X	X	X
Haptoglobin precursor [Contains: Haptoglobin alpha chain; Haptoglobin beta chain]	P00738	X			X	X	X	X	X			X	X					X	X	X	X	X
Hemoglobin subunit alpha (Hemoglobin alpha chain) (Alpha-globin)	P69905			X		X	X	X	X	X			X	X	X	X	X	X	X	X	X	X
Inter-alpha (Globulin) inhibitor, H2 polypeptide Inter-alpha-trypsin inhibitor heavy chain H2 precursor (ITI heavy chain H2) (Inter-alpha-inhibitor heavy chain 2) (Inter-alpha-trypsin inhibitor complex component II) (Serum-derived hyaluronan-associated protein) (SHAP) "Inter-alpha (Globulin) inhibitor, H2 polypeptide "	P19823	X				X				X										X	X
Interleukin enhancer-binding factor 3 (Nuclear factor of activated T- cells 90 kDa) (NF-AT-90) (Double-stranded RNA-binding protein 76) (DRBP76) (Translational control protein 80) (TCP80) (Nuclear factor associated with dsRNA) (NFAR) (M-phase phosphoprotein 4) (MPP4)	Q12906	X			X	X												X	X			X
KRT8 protein (Fragment) "Keratin, type II cytoskeletal 8 (Cytokeratin-8) (CK-8) (Keratin-8) (K8) " Hypothetical protein KRT8 (Fragment)	P05787	X	X	X	X	X	X	X	X	X	X	X	X	X	X	X	X	X	X	X	X	X
Macrophage capping protein (Actin-regulatory protein CAP-G) Hypothetical protein CAPG	P40121	X	X	X	X	X	X	X	X	X		X	X		X					X	X
Myristoylated alanine-rich C-kinase substrate (MARCKS) (Protein kinase C substrate, 80 kDa protein, light chain) (PKCSL) (80K-L protein)	P29966				X		X	X	X	X						X				X	X	X
Retinal dehydrogenase 2 (EC 1.2.1.36) (RalDH2) (RALDH 2) (RALDH(II)) (Retinaldehyde-specific dehydrogenase type 2) (Aldehyde dehydrogenase family 1 member A2)	O94788	X				X	X											X		X	X	X
Protein S100-A6 (S100 calcium-binding protein A6) (Calcyclin) (Prolactin receptor-associated protein) (PRA) (Growth factor-inducible protein 2A9) (MLN 4)	P06703	X	X	X			X		X	X							X		X	X	X
Secreted frizzled-related protein 4 "Secreted frizzled-related protein 4 precursor (sFRP-4) (Frizzled protein, human endometrium) (FrpHE) "	Q6FHJ7	X															X	X	X	X
Serpin H1 precursor (Collagen-binding protein) (Colligin) (47 kDa heat shock protein) (Rheumatoid arthritis-related antigen RA-A47) (Arsenic- transactivated protein 3) (AsTP3) (Proliferation-inducing gene 14 protein) "CDNA FLJ16712 fis, clone UTERU2032279, highly similar to 47 kDa HEAT SHOCK PROTEIN "	P50454	X			X	X		X	X	X						X	X	X	X	X	X	X
Serum albumin precursor	P02768	X			X	X	X	X	X	X	X			X			X	X	X	X	X	X
Transferrin variant (Fragment) Serotransferrin precursor (Transferrin) (Siderophilin) (Beta-1-metal- binding globulin)	P02787	X	X	X	X	X	X	X	X	X	X	X	X	X	X	X	X	X	X	X	X	X
Group-specific component (Vitamin D binding protein) Vitamin D-binding protein variant (Fragment) Vitamin D-binding protein precursor (DBP) (Group-specific component) (Gc-globulin) (VDB)	P02774	X			X	X		X										X		X	X	X
